# Supplementary material for: Mapping disparities in education across low- and middle-income countries
Source: PubMed Central journal article supplement (PMC7015853; doi:10.1038/s41586-019-1872-1), 2019-12-25
Supplement: 41586_2019_1872_MOESM1_ESM.pdf [file 41586_2019_1872_MOESM1_ESM.pdf]

**Supplementary information**

---

**Mapping disparities in education across low- and middle-income countries**

---

In the format provided by the authors and unedited

Local Burden of Disease Educational Attainment Collaborators

# Supplementary Information

## Table of Contents

|                                                                                  |            |
|----------------------------------------------------------------------------------|------------|
| <b>Supplementary Figures .....</b>                                               | <b>2</b>   |
| <b>Supplementary Tables .....</b>                                                | <b>4</b>   |
| <b>1.0 GATHER compliance.....</b>                                                | <b>6</b>   |
| <b>2.0 Supplementary discussion .....</b>                                        | <b>9</b>   |
| <b>2.1 International aid and domestic policy.....</b>                            | <b>9</b>   |
| <b>2.2 Relationship between education and health .....</b>                       | <b>9</b>   |
| <b>3.0 Supplementary data.....</b>                                               | <b>10</b>  |
| <b>3.1 Data excluded from model .....</b>                                        | <b>27</b>  |
| <b>4.0 Supplementary covariates .....</b>                                        | <b>36</b>  |
| <b>5.0 Supplementary methods.....</b>                                            | <b>39</b>  |
| <b>5.1 Cluster combination and spatial integration over polygon records.....</b> | <b>39</b>  |
| <b>5.2 Geostatistical model.....</b>                                             | <b>39</b>  |
| 5.2.1 Model geographies.....                                                     | 39         |
| 5.2.2 Ensemble covariate modelling.....                                          | 40         |
| 5.2.3 Model description .....                                                    | 41         |
| 5.2.4 Priors .....                                                               | 43         |
| 5.2.5 Mesh construction.....                                                     | 45         |
| 5.2.6 Model fitting and estimate generation .....                                | 45         |
| 5.2.7 Model Results .....                                                        | 46         |
| <b>5.3 Model validation .....</b>                                                | <b>90</b>  |
| 5.3.1 In-sample metrics.....                                                     | 90         |
| 5.3.2 Metrics of predictive validity.....                                        | 90         |
| 5.3.3 Post estimation calibration to national estimates.....                     | 149        |
| 5.3.4 Aggregation to first- and second-level administrative subdivisions.....    | 165        |
| 5.3.5 Calculating people with zero years of education .....                      | 165        |
| <b>6.0 Supplementary references.....</b>                                         | <b>166</b> |
| <b>7.0 Authors' contributions .....</b>                                          | <b>169</b> |

## Supplementary Figures

|                                                                                                                                                  |     |
|--------------------------------------------------------------------------------------------------------------------------------------------------|-----|
| Supplementary Figure 1. Education data availability in Africa by type and country for women ages 15–49, 1998–2017.....                           | 31  |
| Supplementary Figure 2. Education data availability in Latin America and the Caribbean by type and country for women ages 15–49, 1998–2017.....  | 32  |
| Supplementary Figure 3. Education data availability in the Middle East and Central Asia by type and country for women ages 15–49, 1998–2017..... | 33  |
| Supplementary Figure 4. Education data availability in East and Southeast Asia by type and country for women ages 15–49, 1998–2017.....          | 34  |
| Supplementary Figure 5. Education data availability in South Asia by type and country for women ages 15–49, 1998–2017.....                       | 35  |
| Supplementary Figure 6. Covariates.....                                                                                                          | 38  |
| Supplementary Figure 7. Finite elements mesh.....                                                                                                | 46  |
| Supplementary Figure 8. Zero years, women ages 15–49 posterior means and 95% uncertainty interval, 2017.....                                     | 70  |
| Supplementary Figure 13. 1–5 years, men ages 15–49 posterior means and 95% uncertainty interval, 2017.....                                       | 75  |
| Supplementary Figure 16. 6–11 years, women ages 15–49 posterior means and 95% uncertainty interval, 2017.....                                    | 78  |
| Supplementary Figure 17. 6–11 years, men ages 15–49 posterior means and 95% uncertainty interval, 2017.....                                      | 79  |
| Supplementary Figure 20. 12+ years, women ages 15–49 posterior means and 95% uncertainty interval, 2017.....                                     | 82  |
| Supplementary Figure 21. 12+ years, men ages 15–49 posterior means and 95% uncertainty interval, 2017.....                                       | 83  |
| Supplementary Figure 23. 12+ years, men ages 20–24 posterior means and 95% uncertainty interval, 2017.....                                       | 85  |
| Supplementary Figure 24. Mean years, women ages 15–49 posterior means and 95% uncertainty interval.....                                          | 86  |
| Supplementary Figure 25. Mean years, men ages 15–49 posterior means and 95% uncertainty interval.....                                            | 87  |
| Supplementary Figure 27. Mean years, men ages 20–24 posterior means and 95% uncertainty interval.....                                            | 89  |
| Supplementary Figure 28. Zero years education (women, ages 15–49) admin 0 aggregation.....                                                       | 92  |
| Supplementary Figure 29. Zero years education (women, ages 15–49) admin 1 aggregation.....                                                       | 93  |
| Supplementary Figure 30. Zero years education (women, ages 15–49) admin 2 aggregation.....                                                       | 94  |
| Supplementary Figure 31. Zero years education (men, ages 15–49) admin 0 aggregation.....                                                         | 95  |
| Supplementary Figure 32. Zero years education (men, ages 15–49) admin 1 aggregation.....                                                         | 96  |
| Supplementary Figure 33. Zero years education (men, ages 15–49) admin 2 aggregation.....                                                         | 97  |
| Supplementary Figure 34. Zero years education (women, ages 20–24) admin 0 aggregation.....                                                       | 99  |
| Supplementary Figure 35. Zero years education (women, ages 20–24) admin 1 aggregation.....                                                       | 100 |
| Supplementary Figure 36. Zero years education (women, ages 20–24) admin 2 aggregation.....                                                       | 101 |
| Supplementary Figure 37. Zero years education (men, ages 20–24) admin 0 aggregation.....                                                         | 102 |
| Supplementary Figure 38. Zero years education (men, ages 20–24) admin 1 aggregation.....                                                         | 103 |
| Supplementary Figure 39. Zero years education (men, ages 20–24) admin 2 aggregation.....                                                         | 104 |
| Supplementary Figure 40. 1–5 years education (women, ages 15–49) admin 0 aggregation.....                                                        | 106 |
| Supplementary Figure 41. 1–5 years education (women, ages 15–49) admin 1 aggregation.....                                                        | 107 |
| Supplementary Figure 42. 1–5 years education (women, ages 15–49) admin 2 aggregation.....                                                        | 108 |
| Supplementary Figure 43. 1–5 years education (men, ages 15–49) admin 0 aggregation.....                                                          | 109 |
| Supplementary Figure 44. 1–5 years education (men, ages 15–49) admin 1 aggregation.....                                                          | 110 |
| Supplementary Figure 45. 1–5 years education (men, ages 15–49) admin 2 aggregation.....                                                          | 111 |
| Supplementary Figure 46. 1–5 years education (women, ages 20–24) admin 0 aggregation.....                                                        | 113 |
| Supplementary Figure 47. 1–5 years education (women, ages 20–24) admin 1 aggregation.....                                                        | 114 |
| Supplementary Figure 48. 1–5 years education (women, ages 20–24) admin 2 aggregation.....                                                        | 115 |

|                                                                                                                   |     |
|-------------------------------------------------------------------------------------------------------------------|-----|
| Supplementary Figure 49. 1–5 years education (men, ages 20–24) admin 0 aggregation.....                           | 116 |
| Supplementary Figure 50. 1–5 years education (men, ages 20–24) admin 1 aggregation.....                           | 117 |
| Supplementary Figure 51. 1–5 years education (men, ages 20–24) admin 2 aggregation.....                           | 118 |
| Supplementary Figure 52. 6–11 years education (women, ages 15–49) admin 0 aggregation.....                        | 120 |
| Supplementary Figure 53. 6–11 years education (women, ages 15–49) admin 1 aggregation.....                        | 121 |
| Supplementary Figure 54. 6–11 years education (women, ages 15–49) admin 2 aggregation.....                        | 122 |
| Supplementary Figure 55. 6–11 years education (men, ages 15–49) admin 2 aggregation.....                          | 123 |
| Supplementary Figure 56. 6–11 years education (men, ages 15–49) admin 2 aggregation.....                          | 124 |
| Supplementary Figure 57. 6–11 years education (men, ages 15–49) admin 2 aggregation.....                          | 125 |
| Supplementary Figure 58. 6–11 years education (women, ages 20–24) admin 0 aggregation.....                        | 127 |
| Supplementary Figure 59. 6–11 years education (women, ages 20–24) admin 1 aggregation.....                        | 128 |
| Supplementary Figure 60. 6–11 years education (women, ages 20–24) admin 2 aggregation.....                        | 129 |
| Supplementary Figure 61. 6–11 years education (men, ages 20–24) admin 0 aggregation.....                          | 130 |
| Supplementary Figure 62. 6–11 years education (men, ages 20–24) admin 1 aggregation.....                          | 131 |
| Supplementary Figure 63. 6–11 years education (men, ages 20–24) admin 2 aggregation.....                          | 132 |
| Supplementary Figure 64. Mean years education (women, ages 15–49) admin 0 aggregation .....                       | 134 |
| Supplementary Figure 65. Mean years education (women, ages 15–49) admin 1 aggregation .....                       | 135 |
| Supplementary Figure 66. Mean years education (women, ages 15–49) admin 2 aggregation .....                       | 136 |
| Supplementary Figure 67. Mean years education (men, ages 15–49) admin 0 aggregation .....                         | 137 |
| Supplementary Figure 68. Mean years education (men, ages 15–49) admin 1 aggregation .....                         | 138 |
| Supplementary Figure 69. Mean years education (men, ages 15–49) admin 2 aggregation .....                         | 139 |
| Supplementary Figure 70. Mean years education (women, ages 20–24) admin 0 aggregation .....                       | 141 |
| Supplementary Figure 71. Mean years education (women, ages 20–24) admin 1 aggregation .....                       | 142 |
| Supplementary Figure 72. Mean years education (women, ages 20–24) admin 2 aggregation .....                       | 143 |
| Supplementary Figure 73. Mean years education (men, ages 20–24) admin 0 aggregation .....                         | 144 |
| Supplementary Figure 74. Mean years education (men, ages 20–24) admin 1 aggregation .....                         | 145 |
| Supplementary Figure 75. Mean years education (men, ages 20–24) admin 2 aggregation .....                         | 146 |
| Supplementary Figure 76. Mean years education (women, ages 15–49) comparison to GBD national estimates.<br>.....  | 149 |
| Supplementary Figure 77. Mean years education (men, ages 15–49) comparison to GBD national estimates.<br>.....    | 150 |
| Supplementary Figure 78. Mean years education (women, ages 20–24) comparison to GBD national estimates.<br>.....  | 151 |
| Supplementary Figure 79. Mean years education (men, ages 20–24) comparison to GBD national estimates.<br>.....    | 152 |
| Supplementary Figure 80. Zero years of education (women, ages 15–49) comparison to GBD national<br>estimates..... | 153 |
| Supplementary Figure 81. Zero years of education (men, ages 15–49) comparison to GBD national estimates.<br>..... | 154 |
| Supplementary Figure 82. Zero years of education (women, ages 20–24) comparison to GBD national<br>estimates..... | 155 |
| Supplementary Figure 83. Zero years of education (men, ages 20–24) comparison to GBD national estimates.<br>..... | 156 |
| Supplementary Figure 84. 1–6 years of education (women, ages 15–49) comparison to GBD national<br>estimates.....  | 157 |
| Supplementary Figure 85. 1–6 years of education (men, ages 15–49) comparison to GBD national estimates.<br>.....  | 158 |
| Supplementary Figure 86. 1–6 years of education (women, ages 20–24) comparison to GBD national<br>estimates.....  | 159 |

|                                                                                                                     |     |
|---------------------------------------------------------------------------------------------------------------------|-----|
| Supplementary Figure 87. 1–6 years of education (men, ages 20–24) comparison to GBD national estimates.<br>.....    | 160 |
| Supplementary Figure 88. 6–11 years of education (women, ages 15–49) comparison to GBD national estimates.<br>..... | 161 |
| Supplementary Figure 89. 6–11 years of education (men, ages 15–49) comparison to GBD national estimates.<br>.....   | 162 |
| Supplementary Figure 90. 6–11 years of education (women, ages 20–24) comparison to GBD national estimates.<br>..... | 163 |
| Supplementary Figure 91. 6–11 years of education (men, ages 20–24) comparison to GBD national estimates.<br>.....   | 164 |

## Supplementary Tables

|                                                                                                                                                                    |    |
|--------------------------------------------------------------------------------------------------------------------------------------------------------------------|----|
| Supplementary Table 1. Guidelines for Accurate and Transparent Health Estimates Reporting (GATHER) checklist                                                       | 6  |
| Supplementary Table 2. List of countries included in analysis, stratified by Socio-Demographic Index, as published in the 2017 Global Burden of Disease Study      | 11 |
| Supplementary Table 3. Sources included in analysis                                                                                                                | 13 |
| Supplementary Table 4. Excluded so                                                                                                                                 |    |
| Supplementary Table 1. Guidelines for Accurate and Transparent Health Estimates Reporting (GATHER) checklist.....                                                  | 6  |
| Supplementary Table 2. List of countries included in analysis, stratified by Socio-Demographic Index, as published in the 2017 Global Burden of Disease Study..... | 11 |
| Supplementary Table 3. Sources included in analysis.....                                                                                                           | 13 |
| Supplementary Table 4. Excluded sources.....                                                                                                                       | 28 |
| 35                                                                                                                                                                 |    |
| Supplementary Table 5. Covariates used in mapping.....                                                                                                             | 36 |
| Supplementary Table 6. Spatial hyperparameter priors by region.....                                                                                                | 44 |
| Supplementary Table 7. List of all modeled outcomes and the populations for which they are modelled.....                                                           | 47 |
| Supplementary Table 8. Proportion with zero years, women ages 15–49, fitted parameters.....                                                                        | 48 |
| Supplementary Table 9. Proportion with 1–5 years, women ages 15–49 fitted parameters.....                                                                          | 49 |
| Supplementary Table 10. Proportion with 6–11 years, women ages 15–49 fitted parameters.....                                                                        | 51 |
| Supplementary Table 11. Proportion with zero years, men ages 15–49 fitted parameters.....                                                                          | 52 |
| Supplementary Table 12. Proportion with 1–5 years, men ages 15–49 fitted parameters.....                                                                           | 53 |
| Supplementary Table 13. Proportion with 6–11 years, men ages 15–49 fitted parameters.....                                                                          | 55 |
| Supplementary Table 14. Proportion with zero years, women ages 20–24 fitted parameters.....                                                                        | 56 |
| Supplementary Table 15. Proportion with 1–5 years, women ages 20–24 fitted parameters.....                                                                         | 58 |
| Supplementary Table 16. Proportion with 6–11 years, women ages 20–24 fitted parameters.....                                                                        | 59 |
| Supplementary Table 17. Proportion with zero years, men ages 20–24 fitted parameters.....                                                                          | 60 |
| Supplementary Table 18. Proportion with 1–5 years, men ages 20–24 fitted parameters.....                                                                           | 62 |
| Supplementary Table 19. Proportion with 6–11 years, men ages 20–24 fitted parameters.....                                                                          | 63 |
| Supplementary Table 20. Mean years, women ages 15–49 fitted parameters.....                                                                                        | 64 |
| Supplementary Table 21. Mean years, men ages 15–49 fitted parameters.....                                                                                          | 66 |
| Supplementary Table 22. Mean years, women ages 20–24 fitted parameters.....                                                                                        | 67 |

|                                                                                                                                                                                             |     |
|---------------------------------------------------------------------------------------------------------------------------------------------------------------------------------------------|-----|
| Supplementary Table 23. Mean years, men ages 20–24 fitted parameters .....                                                                                                                  | 68  |
| Supplementary Table 24. In sample predictive metrics for zero years of education (women, ages 15–49),<br>aggregated to different administrative levels (admin 0, admin 1, and admin 2)..... | 91  |
| Supplementary Table 25. In sample predictive metrics for zero years of education (men, ages 15–49),<br>aggregated to different administrative levels (admin 0, admin 1, and admin2).....    | 91  |
| Supplementary Table 26. In sample predictive metrics for zero years of education (women, ages 20–24),<br>aggregated to admin 0, admin 1, and admin 2 .....                                  | 98  |
| Supplementary Table 27. In sample predictive metrics for zero years of education (men, ages 20–24),<br>aggregated to admin 0, admin 1, and admin 2 .....                                    | 98  |
| Supplementary Table 28. In sample predictive metrics for 1–5 years of education (women, ages 15–49),<br>aggregated to admin 0, admin 1, and admin 2 .....                                   | 105 |
| Supplementary Table 29. In sample predictive metrics for 1–5 years of education (men, ages 15–49),<br>aggregated to admin 0, admin 1, and admin 2 .....                                     | 105 |
| Supplementary Table 30. In sample predictive metrics for 1–5 years of education (women, ages 20–24),<br>aggregated to admin 0, admin 1, and admin 2 .....                                   | 112 |
| Supplementary Table 31. In sample predictive metrics for 1–5 years of education (men, ages 20–24),<br>aggregated to admin 0, admin 1, and admin 2 .....                                     | 112 |
| Supplementary Table 32. In sample predictive metrics for 6–11 years of education (women, ages 15–49),<br>aggregated to admin 0, admin 1, and admin 2 .....                                  | 119 |
| Supplementary Table 33. In sample predictive metrics for 6–11 years of education (men, ages 15–49),<br>aggregated to admin 0, admin 1, and admin 2 .....                                    | 119 |
| Supplementary Table 34. In sample predictive metrics for 6–11 years of education (women, ages 20–24),<br>aggregated to admin 0, admin 1, and admin 2 .....                                  | 126 |
| Supplementary Table 35. In sample predictive metrics for 6–11 years of education (men, ages 20–24),<br>aggregated to admin 0, admin 1, and admin 2 .....                                    | 126 |
| Supplementary Table 36. In sample predictive metrics for mean years of education (women, ages 15–49),<br>aggregated to admin 0, admin 1, and admin 2 .....                                  | 133 |
| Supplementary Table 37. In sample predictive metrics for mean years of education (men, ages 15–49),<br>aggregated to admin 0, admin 1, and admin 2 .....                                    | 133 |
| Supplementary Table 38. In sample predictive metrics for mean years of education (women, ages 20–24),<br>aggregated to admin 0, admin 1, and admin 2 .....                                  | 140 |
| Supplementary Table 39. In sample predictive metrics for mean years of education (men, ages 20–24),<br>aggregated to admin 0, admin 1, and admin 2 .....                                    | 140 |
| Supplementary Table 40. Out of sample predictive metrics for zero years of education (women, ages 15–49),<br>aggregated by fold to admin 0, admin 1, and admin 2 .....                      | 147 |
| Supplementary Table 42. Out of sample predictive metrics for mean years of education (women, ages 15–49),<br>aggregated by fold to admin 0, admin 1, and admin 2 .....                      | 148 |
| Supplementary Table 43. Out of sample predictive metrics for mean years of education (women, ages 20–24),<br>aggregated by fold to admin 0, admin 1, and admin 2 .....                      | 148 |
| Supplementary Table 44. Quartiles for raking factors (RF) from MBG to GBD estimates for all indicators                                                                                      | 165 |

## 1.0 GATHER compliance

**Supplementary Table 1. Guidelines for Accurate and Transparent Health Estimates Reporting (GATHER) checklist**

| Item #                                                                                                | Checklist item                                                                                                                                                                                                                                                                                                                                                                            | Reported in                                                                 |
|-------------------------------------------------------------------------------------------------------|-------------------------------------------------------------------------------------------------------------------------------------------------------------------------------------------------------------------------------------------------------------------------------------------------------------------------------------------------------------------------------------------|-----------------------------------------------------------------------------|
| <b>Objectives and funding</b>                                                                         |                                                                                                                                                                                                                                                                                                                                                                                           |                                                                             |
| 1                                                                                                     | Define the indicator(s), populations (including age, sex, and geographic entities), and time period(s) for which estimates were made.                                                                                                                                                                                                                                                     | Main text: Precision public health and education, Main text: Methods        |
| 2                                                                                                     | List the funding sources for the work.                                                                                                                                                                                                                                                                                                                                                    | Main text: Acknowledgements                                                 |
| <b>Data Inputs</b>                                                                                    |                                                                                                                                                                                                                                                                                                                                                                                           |                                                                             |
| <i>For all data inputs from multiple sources that are synthesized as part of the study:</i>           |                                                                                                                                                                                                                                                                                                                                                                                           |                                                                             |
| 3                                                                                                     | Describe how the data were identified and how the data were accessed.                                                                                                                                                                                                                                                                                                                     | Main text: Methods (Analysis)                                               |
| 4                                                                                                     | Specify the inclusion and exclusion criteria. Identify all ad-hoc exclusions.                                                                                                                                                                                                                                                                                                             | Main text: Methods, Supplementary Information: 3.1 Data excluded from model |
| 5                                                                                                     | Provide information on all included data sources and their main characteristics. For each data source used, report reference information or contact name/institution, population represented, data collection method, year(s) of data collection, sex and age range, diagnostic criteria or measurement method, and sample size, as relevant.                                             | Supplementary Information: Extended Data Table 1                            |
| 6                                                                                                     | Identify and describe any categories of input data that have potentially important biases (e.g., based on characteristics listed in item 5).                                                                                                                                                                                                                                              | Main text: Methods                                                          |
| <i>For data inputs that contribute to the analysis but were not synthesized as part of the study:</i> |                                                                                                                                                                                                                                                                                                                                                                                           |                                                                             |
| 7                                                                                                     | Describe and give sources for any other data inputs.                                                                                                                                                                                                                                                                                                                                      | Supplementary Information: 4.0 Supplementary covariates                     |
| <i>For all data inputs:</i>                                                                           |                                                                                                                                                                                                                                                                                                                                                                                           |                                                                             |
| 8                                                                                                     | Provide all data inputs in a file format from which data can be efficiently extracted (e.g., a spreadsheet rather than a PDF), including all relevant meta-data listed in item 5. For any data inputs that cannot be shared because of ethical or legal reasons, such as third-party ownership, provide a contact name or the name of the institution that retains the right to the data. | Supplementary Information: Extended Data Table 1                            |
| <b>Data analysis</b>                                                                                  |                                                                                                                                                                                                                                                                                                                                                                                           |                                                                             |

| <b>Item #</b>                 | <b>Checklist item</b>                                                                                                                                                                                                                                                   | <b>Reported in</b>                                                                                               |
|-------------------------------|-------------------------------------------------------------------------------------------------------------------------------------------------------------------------------------------------------------------------------------------------------------------------|------------------------------------------------------------------------------------------------------------------|
| <b>9</b>                      | Provide a conceptual overview of the data analysis method. A diagram may be helpful.                                                                                                                                                                                    | Main text: Methods (Analysis)                                                                                    |
| <b>10</b>                     | Provide a detailed description of all steps of the analysis, including mathematical formulae. This description should cover, as relevant, data cleaning, data pre-processing, data adjustments and weighting of data sources, and mathematical or statistical model(s). | Main text: Methods, Supplementary Information: 5.2 Geostatistical model                                          |
| <b>11</b>                     | Describe how candidate models were evaluated and how the final model(s) were selected.                                                                                                                                                                                  | Main text: Methods (Model validation), Supplementary Information: 5.2 Geostatistical model, 5.3 Model validation |
| <b>12</b>                     | Provide the results of an evaluation of model performance, if done, as well as the results of any relevant sensitivity analysis.                                                                                                                                        | Main text: Methods (Model validation), Supplementary Information: 5.2 Geostatistical model, 5.3 Model validation |
| <b>13</b>                     | Describe methods for calculating uncertainty of the estimates. State which sources of uncertainty were, and were not, accounted for in the uncertainty analysis.                                                                                                        | Main text: Methods (Model validation), Supplementary Information: 5.2 Geostatistical model, 5.3 Model validation |
| <b>14</b>                     | State how analytic or statistical source code used to generate estimates can be accessed.                                                                                                                                                                               | Available at <a href="http://ghdx.healthdata.org/lbd-data">http://ghdx.healthdata.org/lbd-data</a>               |
| <b>Results and Discussion</b> |                                                                                                                                                                                                                                                                         |                                                                                                                  |
| <b>15</b>                     | Provide published estimates in a file format from which data can be efficiently extracted.                                                                                                                                                                              | Raster files for spatial data and CSVs of estimates available at                                                 |
| <b>16</b>                     | Report a quantitative measure of the uncertainty of the estimates (e.g., uncertainty intervals).                                                                                                                                                                        | Supplementary Information: 5.2 Geostatistical model, 5.3 Model validation                                        |
| <b>17</b>                     | Interpret results in light of existing evidence. If updating a previous set of estimates, describe the reasons for changes in estimates.                                                                                                                                | Main text: Persistent differences in educational attainment, Implications for international goals                |



| <b>Item #</b> | <b>Checklist item</b>                                                                                                                                    | <b>Reported in</b>                                                                                                               |
|---------------|----------------------------------------------------------------------------------------------------------------------------------------------------------|----------------------------------------------------------------------------------------------------------------------------------|
| <b>18</b>     | Discuss limitations of the estimates. Include a discussion of any modelling assumptions or data limitations that affect interpretation of the estimates. | Main text:<br>Discussion, limitations and future work, Supplementary Information: 2.4<br>Limitations of a geographic perspective |

## 2.0 Supplementary discussion

### 2.1 International aid and domestic policy

After years of deprioritization in the global aid portfolio, in 2016 aid to education reached its highest level since 2002<sup>1</sup>. Despite this shift, only 22% of aid to basic education went to low-income countries in 2016 compared to 36% in 2002 (basic education defined as primary and lower-secondary)<sup>2</sup>. This reflects a concerning and persistent pattern of the distribution of aid not aligning with the distribution of greatest need, even at the national level. Beyond international aid, domestic policy is also a critical tool for expanding access to education, especially at higher levels. In sub-Saharan countries such as Ghana, Burundi, Kenya, Malawi, the United Republic of Tanzania, or Uganda, primary enrollment rates increased dramatically after primary education fees were removed<sup>3</sup>. Most low- and middle-income countries (LMICs) are now providing free primary education, but significant monetary obstacles remain in place for accessing secondary and tertiary education. Enrollment rates drop significantly in secondary school and tertiary due to tuition fees and other education costs (e.g., uniforms, school supplies, travel time)<sup>1,4</sup>.

### 2.2 Relationship between education and health

Policy and intervention research has called for an increased focus on mapping the relationships between the different Sustainable Development Goals (SDGs), such as the effect of educational levels and equity on the goals related to child growth failure and mortality<sup>2,5</sup>. In determining risks to development during childhood, the educational attainment of mothers has been repeatedly identified as a critical factor associated with the quality of child care, survival, and healthy growth trajectories<sup>6-11</sup>. This effect operates on the quality of care sought and attained during pregnancy and post-partum, as well as the quality of care for children through the duration of breastfeeding and healthcare-seeking when children are ill<sup>12,13</sup>. Beyond an individual's education, a comprehensive multi-level study demonstrated that increases in the average educational attainment within communities are associated with improved nutrition and survival for all children in that community<sup>14</sup>. Gender inequality is also recognized for its impact on child undernutrition through women's control of their time, household income, and mental health. Around the world, girls are less likely than boys to attend and finish primary school and gender inequality in education inhibits national economic growth<sup>1,15-17</sup>. This robust body of evidence, along with a pattern of inequitable distribution of aid, suggests that precision estimates of educational attainment and inequality therein will provide a powerful tool for advocates and policymakers to achieve cross-cutting progress towards the SDGs.

The SDGs related to education, child mortality, and child nutrition are all framed around the importance of equity in progress towards targets across dimensions such as geography and gender<sup>18,19</sup>. Indicators such as under-5 mortality and stunting have seen dramatic improvement over the past few decades, but recent geospatial analyses find persistent disadvantage remains subnationally<sup>20,21</sup>. The global health agenda is increasingly focused on precision public health

evidence illustrating the subnational distribution of disease and illness<sup>22,23</sup>, but an agenda focused on equity for the future must integrate comparable evidence on the distribution of social determinants of health<sup>20,21,24</sup>.

### 3.0 Supplementary data

We compiled a database of survey and census datasets that contained geocoding of subnational administrative boundaries or GPS coordinates for sampled clusters. These included datasets from 528 sources (see Supplementary Table 2). These sources comprised at least one data source for all but two countries on our list of LMICs: Western Sahara and French Guiana. We chose to exclude these two countries from our analysis. Of the included countries, 42 of 105 have only subnational administrative level data. We extracted demographic, education, and sample design variables. The coding of educational attainment varies across survey families. In some surveys, the precise number of years of attainment is not provided, with attainment instead aggregated into categories such as “primary completion” or “secondary completion”. In such cases, individuals who report “primary completion” may have gone on to complete some portion of secondary education, but these additional years of education are not captured in the underlying data set. Previous efforts to examine trends in mean years of education have either assumed that no additional years of education were completed (i.e., primary education only) or have used the midpoint between primary and secondary education as a proxy<sup>25</sup>. Trends in the single-year data, however, demonstrate that such assumptions introduce bias in the estimation of attainment trends over time and space, as differences in actual drop-out patterns or binning schema can lead to biased mean estimates<sup>26</sup>.

For this analysis, we employed a novel method that selects a training subset of similar surveys across time and space to estimate the unobserved single-year distribution of binned datasets<sup>26</sup>. In comprehensive tests of cross-validation leveraging data where the single-year distribution is observed, this algorithmic approach significantly reduces bias in summary statistics estimated from datasets with binned coding schemes compared to alternatives such as the standard-duration method. The years in all coding schemes were mapped to the country- and year-specific references in the UNESCO International Standard Classification of Education (ISCED) for comparability<sup>27</sup>. We used a top coding of 18 years on all data; this is a common threshold in many surveys that have a cap and it is reasonable to assume that the importance of education for health outcomes (and other related SDGs) greatly diminishes after what is the equivalent of 2 to 3 years of graduate education in most systems.

Data were aggregated to mean years of education attained and the proportions achieving key levels of education. The levels chosen were proportion with zero years, proportion with less than primary school (1–5 years), proportion with at least primary school (6–11 years), and proportion achieving secondary school or higher (12 or more years). A subset of the data for a smaller age-bin (20–24 years) were also examined to more closely track temporal shifts. Equivalent age-bins were aggregated for both women and men in order to examine disparities in mean years of attainment by sex. Where GPS coordinates were available, data were aggregated to a specific

latitude/longitude assuming a simple-random-sample, as the cluster is the primary sampling unit for the stratified design survey families such as the Demographic and Health Survey (DHS) and Multiple Indicator Cluster Survey (MICS). Where only geography information was available at the level of administrative units, data were aggregated with appropriate weighting according to their sample design. Design effects were estimated using a package for analyzing complex survey data in R<sup>28</sup>.

The data sources used to model educational attainment indicators are described in Supplementary Table 3. Supplementary Figures 1–5 display data availability for mean years of education in women 15–49 for 5 broad regions. Data sources are the same between all indicators.

**Supplementary Table 2. List of countries included in analysis, stratified by Socio-Demographic Index, as published in the 2017 Global Burden of Disease Study**

| Low SDI                          | Low Middle SDI        | Middle SDI          | High Middle SDI |
|----------------------------------|-----------------------|---------------------|-----------------|
| Afghanistan                      | Angola                | Algeria             | China           |
| Bangladesh                       | Belize                | Botswana            | Iran            |
| Benin                            | Bhutan                | Brazil              | Libya           |
| Burkina Faso                     | Bolivia               | Colombia            | Malaysia        |
| Burundi                          | Cambodia              | Costa Rica          |                 |
| Central African Republic         | Cameroon              | Cuba                |                 |
| Chad                             | Cape Verde            | Ecuador             |                 |
| Comoros                          | Djibouti              | Equatorial Guinea   |                 |
| Côte d'Ivoire                    | Dominican Republic    | Gabon               |                 |
| Democratic Republic of the Congo | Egypt                 | Indonesia           |                 |
| Eritrea                          | El Salvador           | Jamaica             |                 |
| Ethiopia                         | Ghana                 | Jordan              |                 |
| Guinea                           | Guatemala             | Mexico              |                 |
| Guinea-Bissau                    | Guyana                | Mongolia            |                 |
| Haiti                            | Honduras              | Namibia             |                 |
| Liberia                          | India                 | Panama              |                 |
| Madagascar                       | Iraq                  | Paraguay            |                 |
| Malawi                           | Kenya                 | Peru                |                 |
| Mali                             | Kyrgyzstan            | Philippines         |                 |
| Mozambique                       | Laos                  | South Africa        |                 |
| Nepal                            | Lesotho               | Sri Lanka           |                 |
| Niger                            | Mauritania            | Suriname            |                 |
| Papua New Guinea                 | Morocco               | Syria               |                 |
| Rwanda                           | Myanmar               | Thailand            |                 |
| Senegal                          | Nicaragua             | Trinidad and Tobago |                 |
| Sierra Leone                     | Nigeria               | Tunisia             |                 |
| Somalia                          | Pakistan              | Turkmenistan        |                 |
| South Sudan                      | Palestine             | Uzbekistan          |                 |
| Tanzania                         | Republic of the Congo | Venezuela           |                 |
| The Gambia                       | São Tomé and Príncipe | Vietnam             |                 |
| Togo                             | Sudan                 |                     |                 |
| Uganda                           | Swaziland             |                     |                 |
| Yemen                            | Tajikistan            |                     |                 |
|                                  | Timor-Leste           |                     |                 |

|          |
|----------|
| Zambia   |
| Zimbabwe |

**Supplementary Table 3. Sources included in analysis**

| Country            | Source Year | Source           | Sample Size | Number of geo-positioned clusters | Number of polygons | GHDx ID* | In Last Paper |
|--------------------|-------------|------------------|-------------|-----------------------------------|--------------------|----------|---------------|
| <b>Afghanistan</b> | 2006        | Country-specific | 24,561      | 708                               | 29                 | 18468†   | No            |
| <b>Afghanistan</b> | 2010        | UNICEF MICS      | 45,191      | 914                               | 34                 | 56830    | No            |
| <b>Algeria</b>     | 2012        | UNICEF MICS      | 84,574      | 1,909                             | 7                  | 210614   | Yes           |
| <b>Angola</b>      | 2001        | UNICEF MICS      | 13,002      | 1,503                             | 18                 | 687      | Yes           |
| <b>Angola</b>      | 2007        | DHS MIS          | 2,953       | 115                               | 0                  | 672      | No            |
| <b>Angola</b>      | 2015        | DHS              | 27,806      | 625                               | 0                  | 218555   | Yes           |
| <b>Bangladesh</b>  | 2001        | Country-specific | 260,832     | 208                               | 64                 | 18920    | No            |
| <b>Bangladesh</b>  | 2001        | Country-specific | 5,517,658   | 466                               | 457                | 105319   | No            |
| <b>Bangladesh</b>  | 2004        | DHS              | 27,972      | 359                               | 0                  | 18902    | No            |
| <b>Bangladesh</b>  | 2006        | UNICEF MICS      | 152,860     | 207                               | 64                 | 951      | No            |
| <b>Bangladesh</b>  | 2007        | DHS              | 27,433      | 361                               | 0                  | 18913    | No            |
| <b>Bangladesh</b>  | 2011        | DHS              | 42,205      | 600                               | 0                  | 55956    | No            |
| <b>Bangladesh</b>  | 2012        | UNICEF MICS      | 118,561     | 208                               | 64                 | 151086   | No            |
| <b>Bangladesh</b>  | 2014        | DHS              | 41,543      | 178                               | 7                  | 157021   | No            |
| <b>Belize</b>      | 2006        | UNICEF MICS      | 3,730       | 30                                | 6                  | 1089     | No            |
| <b>Belize</b>      | 2011        | UNICEF MICS      | 7,468       | 30                                | 6                  | 76699    | No            |
| <b>Belize</b>      | 2013        | Country-specific | 8,959       | 30                                | 6                  | 314646   | No            |
| <b>Belize</b>      | 2015        | UNICEF MICS      | 9,457       | 30                                | 6                  | 264910   | No            |
| <b>Benin</b>       | 2002        | Census           | 293,300     | 183                               | 76                 | 367347   | No            |
| <b>Benin</b>       | 2013        | Census           | 447,851     | 183                               | 76                 | 367419   | No            |
| <b>Benin</b>       | 2001        | DHS              | 30,417      | 247                               | 0                  | 18950    | Yes           |
| <b>Benin</b>       | 2006        | DHS              | 90,650      | 0                                 | 12                 | 18959    | Yes           |
| <b>Benin</b>       | 2011        | DHS              | 88,174      | 750                               | 0                  | 79839    | Yes           |
| <b>Bhutan</b>      | 2005        | Country-specific | 43,911      | 47                                | 0                  | 1175†    | No            |
| <b>Bhutan</b>      | 2010        | UNICEF MICS      | 33,300      | 59                                | 20                 | 40028    | No            |
| <b>Bhutan</b>      | 2017        | Country-specific | 6,748       | 61                                | 20                 | 394652†  | No            |
| <b>Bolivia</b>     | 2000        | UNICEF MICS      | 8,718       | 1,317                             | 3                  | 1289     | No            |
| <b>Bolivia</b>     | 2001        | Census           | 396,370     | 1,355                             | 83                 | 1362     | No            |
| <b>Bolivia</b>     | 2012        | Country-specific | 5,899       | 7                                 | 4                  | 298261   | No            |
| <b>Bolivia</b>     | 2016        | Country-specific | 23,968      | 1,320                             | 9                  | 323944   | No            |
| <b>Botswana</b>    | 2000        | UNICEF MICS      | 13,731      | 705                               | 14                 | 1404     | Yes           |
| <b>Botswana</b>    | 2001        | Country-specific | 2,946       | 645                               | 21                 | 22112    | No            |
| <b>Botswana</b>    | 2001        | Census           | 86,820      | 707                               | 22                 | 294205   | No            |
| <b>Botswana</b>    | 2004        | Country-specific | 7,917       | 396                               | 0                  | 22114    | No            |
| <b>Botswana</b>    | 2008        | Country-specific | 8,932       | 395                               | 0                  | 22116    | No            |
| <b>Botswana</b>    | 2011        | Census           | 109,473     | 707                               | 22                 | 294235   | No            |
| <b>Botswana</b>    | 2013        | Country-specific | 6,182       | 292                               | 0                  | 134753   | No            |
| <b>Brazil</b>      | 2000        | Country-specific | 10,749,064  | 12,841                            | 5,217              | 1590†    | No            |

| Country             | Source Year | Source           | Sample Size | Number of geo-positioned clusters | Number of polygons | GHDx ID* | In Last Paper |
|---------------------|-------------|------------------|-------------|-----------------------------------|--------------------|----------|---------------|
| <b>Brazil</b>       | 2000        | Census           | 4,411,453   | 8,279                             | 1,986              | 38230    | No            |
| <b>Brazil</b>       | 2001        | Country-specific | 205,512     | 10,108                            | 27                 | 1477     | No            |
| <b>Brazil</b>       | 2002        | Country-specific | 209,641     | 10,108                            | 27                 | 1488     | No            |
| <b>Brazil</b>       | 2002        | Country-specific | 92,617      | 10,108                            | 27                 | 33019    | No            |
| <b>Brazil</b>       | 2003        | Country-specific | 210,168     | 10,108                            | 27                 | 1489     | No            |
| <b>Brazil</b>       | 2004        | Country-specific | 217,623     | 10,108                            | 27                 | 1490     | No            |
| <b>Brazil</b>       | 2005        | Country-specific | 222,787     | 10,108                            | 27                 | 80311    | No            |
| <b>Brazil</b>       | 2006        | Country-specific | 223,835     | 10,108                            | 27                 | 93528    | No            |
| <b>Brazil</b>       | 2006        | Country-specific | 31,030      | 10,094                            | 5                  | 141948   | No            |
| <b>Brazil</b>       | 2007        | Country-specific | 217,841     | 10,108                            | 27                 | 93490    | No            |
| <b>Brazil</b>       | 2008        | Country-specific | 213,243     | 10,108                            | 27                 | 93487    | No            |
| <b>Brazil</b>       | 2009        | Country-specific | 217,307     | 10,108                            | 27                 | 93522    | No            |
| <b>Brazil</b>       | 2010        | Census           | 5,271,618   | 11,345                            | 2,424              | 105322   | No            |
| <b>Brazil</b>       | 2011        | Country-specific | 194,871     | 10,108                            | 27                 | 106724   | No            |
| <b>Brazil</b>       | 2012        | Country-specific | 195,575     | 10,108                            | 27                 | 156581   | No            |
| <b>Brazil</b>       | 2013        | Country-specific | 194,816     | 10,108                            | 27                 | 156583   | No            |
| <b>Brazil</b>       | 2014        | Country-specific | 193,934     | 10,108                            | 27                 | 238441   | No            |
| <b>Brazil</b>       | 2015        | Country-specific | 189,690     | 10,108                            | 27                 | 281548   | No            |
| <b>Burkina Faso</b> | 1998        | DHS              | 12,756      | 208                               | 0                  | 19076    | Yes           |
| <b>Burkina Faso</b> | 2003        | DHS              | 24,633      | 397                               | 0                  | 19088    | Yes           |
| <b>Burkina Faso</b> | 2006        | UNICEF MICS      | 15,521      | 195                               | 0                  | 1927     | Yes           |
| <b>Burkina Faso</b> | 2006        | Census           | 369,435     | 378                               | 236                | 105403   | Yes           |
| <b>Burkina Faso</b> | 2010        | DHS              | 30,851      | 541                               | 0                  | 19133    | Yes           |
| <b>Burkina Faso</b> | 2014        | DHS MIS          | 7,968       | 248                               | 0                  | 188785   | No            |
| <b>Burundi</b>      | 2000        | UNICEF MICS      | 9,127       | 39                                | 17                 | 1994     | Yes           |
| <b>Burundi</b>      | 2005        | UNICEF MICS      | 17,948      | 39                                | 17                 | 1981     | Yes           |
| <b>Burundi</b>      | 2010        | DHS              | 18,853      | 376                               | 0                  | 30431    | Yes           |
| <b>Burundi</b>      | 2012        | DHS MIS          | 10,217      | 200                               | 0                  | 108080   | No            |
| <b>Burundi</b>      | 2016        | DHS              | 33,115      | 552                               | 0                  | 286766   | No            |
| <b>Cambodia</b>     | 2000        | DHS              | 30,583      | 470                               | 0                  | 19156    | No            |
| <b>Cambodia</b>     | 2000        | Country-specific | 14,003      | 226                               | 24                 | 282112   | No            |
| <b>Cambodia</b>     | 2001        | Country-specific | 13,979      | 224                               | 23                 | 2003     | No            |
| <b>Cambodia</b>     | 2005        | DHS              | 34,841      | 548                               | 0                  | 19167    | No            |
| <b>Cambodia</b>     | 2008        | Census           | 1,235,351   | 301                               | 164                | 35329    | No            |
| <b>Cambodia</b>     | 2010        | DHS              | 39,768      | 607                               | 0                  | 30379    | No            |
| <b>Cambodia</b>     | 2013        | Country-specific | 68,211      | 226                               | 24                 | 164729†  | No            |
| <b>Cambodia</b>     | 2014        | DHS              | 37,278      | 611                               | 0                  | 157024   | No            |
| <b>Cameroon</b>     | 1998        | DHS              | 11,735      | 553                               | 10                 | 19198    | Yes           |
| <b>Cameroon</b>     | 2000        | UNICEF MICS      | 11,105      | 553                               | 10                 | 2053     | Yes           |

| Country                  | Source Year | Source           | Sample Size | Number of geo-positioned clusters | Number of polygons | GHDx ID* | In Last Paper |
|--------------------------|-------------|------------------|-------------|-----------------------------------|--------------------|----------|---------------|
| Cameroon                 | 2005        | Census           | 777,045     | 538                               | 209                | 105800   | Yes           |
| Cameroon                 | 2006        | UNICEF MICS      | 19,018      | 753                               | 191                | 2063     | Yes           |
| Cameroon                 | 2014        | UNICEF MICS      | 20,174      | 531                               | 206                | 244455   | No            |
| Cameroon                 | 2004        | DHS              | 51,976      | 465                               | 0                  | 19211    | Yes           |
| Cameroon                 | 2011        | DHS              | 72,622      | 578                               | 0                  | 19274    | Yes           |
| Cape Verde               | 1998        | CDC RHS          | 6,250       | 12                                | 12                 | 27511    | No            |
| Central African Republic | 2000        | UNICEF MICS      | 37,252      | 702                               | 17                 | 2209     | Yes           |
| Central African Republic | 2006        | UNICEF MICS      | 26,753      | 646                               | 16                 | 2223     | Yes           |
| Central African Republic | 2010        | UNICEF MICS      | 25,324      | 702                               | 17                 | 82832    | Yes           |
| Chad                     | 2000        | UNICEF MICS      | 11,572      | 1,462                             | 15                 | 2244     | Yes           |
| Chad                     | 2004        | DHS              | 12,476      | 1,466                             | 9                  | 19315    | Yes           |
| Chad                     | 2010        | UNICEF MICS      | 36,464      | 1,453                             | 60                 | 76701    | Yes           |
| Chad                     | 2014        | DHS              | 36,100      | 624                               | 0                  | 157025   | Yes           |
| China                    | 2000        | Census           | 6,651,846   | 13,159                            | 339                | 294255   | No            |
| China                    | 2004        | Country-specific | 25,747      | 13,014                            | 31                 | 120994†  | No            |
| China                    | 2007        | WHO              | 9,109       | 1,874                             | 8                  | 60405†   | No            |
| China                    | 2007        | Country-specific | 38,195      | 13,014                            | 31                 | 111916†  | No            |
| China                    | 2010        | Country-specific | 67,468      | 13,014                            | 31                 | 103981†  | No            |
| China                    | 2010        | Census           | 718,432,187 | 5,611                             | 21                 | 124067†  | No            |
| China                    | 2010        | Country-specific | 20,110      | 6,579                             | 25                 | 283812   | No            |
| China                    | 2011        | Country-specific | 14,064      | 333                               | 98                 | 397821†  | No            |
| China                    | 2012        | Country-specific | 12,201      | 9,683                             | 27                 | 283815   | No            |
| China                    | 2012        | Country-specific | 3,724       | 27                                | 1                  | 298372   | No            |
| China                    | 2013        | Country-specific | 21,317      | 2,129                             | 96                 | 397820†  | No            |
| China                    | 2014        | Country-specific | 8,650       | 8,789                             | 26                 | 283816   | No            |
| China                    | 2015        | Country-specific | 21,931      | 404                               | 132                | 394660†  | No            |
| Colombia                 | 2000        | DHS              | 24,498      | 673                               | 23                 | 19359    | No            |
| Colombia                 | 2004        | DHS              | 79,166      | 1,318                             | 33                 | 19324    | No            |
| Colombia                 | 2005        | Census           | 1,947,305   | 1,582                             | 487                | 3029     | No            |
| Colombia                 | 2007        | Country-specific | 29,141      | 1,321                             | 33                 | 3100†    | No            |
| Colombia                 | 2009        | DHS              | 56,658      | 2,695                             | 0                  | 21281    | No            |
| Colombia                 | 2016        | DHS              | 80,291      | 1,321                             | 33                 | 218566   | No            |
| Comoros                  | 2000        | UNICEF MICS      | 10,690      | 4                                 | 3                  | 3114     | No            |
| Comoros                  | 2012        | DHS              | 10,567      | 242                               | 0                  | 76850    | Yes           |
| Costa Rica               | 2000        | Census           | 204,185     | 104                               | 63                 | 3243     | No            |
| Costa Rica               | 2011        | UNICEF MICS      | 11,092      | 63                                | 7                  | 125596   | No            |
| Costa Rica               | 2011        | Census           | 236,795     | 104                               | 64                 | 227111   | No            |



| Country                          | Source Year | Source           | Sample Size | Number of geo-positioned clusters | Number of polygons | GHDx ID* | In Last Paper |
|----------------------------------|-------------|------------------|-------------|-----------------------------------|--------------------|----------|---------------|
| Costa Rica                       | 2015        | Country-specific | 19,812      | 64                                | 6                  | 238431   | No            |
| Côte d'Ivoire                    | 1998        | DHS              | 6,435       | 140                               | 0                  | 18531    | Yes           |
| Côte d'Ivoire                    | 2000        | UNICEF MICS      | 22,889      | 384                               | 11                 | 26444    | Yes           |
| Côte d'Ivoire                    | 2005        | DHS AIS          | 11,774      | 384                               | 11                 | 56148    | No            |
| Côte d'Ivoire                    | 2006        | UNICEF MICS      | 24,540      | 282                               | 52                 | 26433    | Yes           |
| Côte d'Ivoire                    | 2011        | DHS              | 21,963      | 341                               | 0                  | 18533    | Yes           |
| Côte d'Ivoire                    | 2016        | UNICEF MICS      | 24,602      | 384                               | 11                 | 218611   | No            |
| Cuba                             | 2002        | Census           | 598,939     | 142                               | 15                 | 3317     | No            |
| Cuba                             | 2006        | UNICEF MICS      | 16,311      | 137                               | 4                  | 3310     | No            |
| Cuba                             | 2010        | UNICEF MICS      | 17,589      | 143                               | 15                 | 60935    | No            |
| Cuba                             | 2014        | UNICEF MICS      | 16,451      | 137                               | 4                  | 169975   | No            |
| Democratic Republic of the Congo | 2001        | UNICEF MICS      | 24,791      | 2,717                             | 11                 | 3161     | Yes           |
| Democratic Republic of the Congo | 2007        | DHS              | 20,454      | 293                               | 0                  | 19381    | Yes           |
| Democratic Republic of the Congo | 2010        | UNICEF MICS      | 24,599      | 357                               | 0                  | 26998    | Yes           |
| Democratic Republic of the Congo | 2013        | DHS              | 34,666      | 492                               | 0                  | 76878    | Yes           |
| Djibouti                         | 2006        | UNICEF MICS      | 14,641      | 36                                | 1                  | 3404     | Yes           |
| Dominican Republic               | 1999        | DHS              | 2,817       | 62                                | 8                  | 19431    | No            |
| Dominican Republic               | 2000        | UNICEF MICS      | 8,399       | 75                                | 30                 | 27069    | No            |
| Dominican Republic               | 2002        | DHS              | 51,429      | 76                                | 32                 | 19444    | No            |
| Dominican Republic               | 2002        | Census           | 348,280     | 91                                | 78                 | 151296   | No            |
| Dominican Republic               | 2007        | DHS              | 58,180      | 1,425                             | 0                  | 19456    | No            |
| Dominican Republic               | 2007        | Country-specific | 3,351       | 23                                | 9                  | 21198    | No            |
| Dominican Republic               | 2010        | Census           | 483,543     | 97                                | 83                 | 151304   | No            |
| Dominican Republic               | 2013        | DHS              | 20,581      | 524                               | 0                  | 77819    | No            |
| Dominican Republic               | 2013        | Country-specific | 3,881       | 114                               | 0                  | 165645   | No            |
| Dominican Republic               | 2014        | UNICEF MICS      | 58,195      | 63                                | 10                 | 200697   | No            |
| Ecuador                          | 1999        | CDC RHS          | 14,095      | 279                               | 21                 | 27621    | No            |
| Ecuador                          | 2001        | Census           | 617,412     | 358                               | 133                | 3549     | No            |

| Country           | Source Year | Source           | Sample Size | Number of geo-positioned clusters | Number of polygons | GHDx ID* | In Last Paper |
|-------------------|-------------|------------------|-------------|-----------------------------------|--------------------|----------|---------------|
| Ecuador           | 2004        | CDC RHS          | 10,268      | 690                               | 0                  | 27630    | No            |
| Ecuador           | 2010        | Census           | 725,472     | 360                               | 140                | 105801   | No            |
| Egypt             | 2000        | DHS              | 46,487      | 997                               | 0                  | 19511    | Yes           |
| Egypt             | 2003        | DHS              | 24,597      | 924                               | 0                  | 19529    | No            |
| Egypt             | 2005        | DHS              | 56,711      | 1,298                             | 0                  | 19521    | Yes           |
| Egypt             | 2006        | Census           | 3,993,131   | 1,136                             | 316                | 35578    | Yes           |
| Egypt             | 2008        | DHS              | 47,652      | 1,244                             | 0                  | 26842    | Yes           |
| Egypt             | 2013        | UNICEF MICS      | 16,026      | 27                                | 6                  | 159617   | No            |
| Egypt             | 2014        | DHS              | 60,038      | 1,817                             | 0                  | 154897   | Yes           |
| El Salvador       | 1998        | CDC RHS          | 12,634      | 22                                | 9                  | 27590    | No            |
| El Salvador       | 2007        | Census           | 285,613     | 106                               | 103                | 56476    | No            |
| El Salvador       | 2008        | CDC RHS          | 12,008      | 32                                | 14                 | 27606    | No            |
| El Salvador       | 2014        | UNICEF MICS      | 27,268      | 32                                | 14                 | 200636   | No            |
| Equatorial Guinea | 2000        | UNICEF MICS      | 8,312       | 35                                | 7                  | 3655     | No            |
| Eritrea           | 2002        | DHS              | 18,464      | 148                               | 6                  | 19539    | Yes           |
| Ethiopia          | 2000        | DHS              | 31,427      | 533                               | 0                  | 19571    | Yes           |
| Ethiopia          | 2004        | Country-specific | 79,637      | 1,302                             | 10                 | 34085†   | No            |
| Ethiopia          | 2005        | DHS              | 29,557      | 528                               | 0                  | 19557    | Yes           |
| Ethiopia          | 2010        | DHS              | 32,611      | 571                               | 0                  | 21301    | Yes           |
| Ethiopia          | 2014        | Country-specific | 6,537       | 1,340                             | 11                 | 153503   | No            |
| Ethiopia          | 2014        | DHS              | 18,182      | 1,339                             | 11                 | 153507†  | No            |
| Ethiopia          | 2014        | Country-specific | 6,537       | 1,340                             | 11                 | 256175   | No            |
| Ethiopia          | 2015        | Country-specific | 6,753       | 1,340                             | 11                 | 256176   | No            |
| Ethiopia          | 2016        | DHS              | 30,798      | 622                               | 0                  | 218568   | Yes           |
| Ethiopia          | 2007        | Census           | 7,434,086   | 0                                 | 631                | 227133   | Yes           |
| Gabon             | 2000        | DHS              | 13,727      | 298                               | 40                 | 19579    | Yes           |
| Gabon             | 2012        | DHS              | 16,781      | 331                               | 0                  | 76706    | Yes           |
| Ghana             | 1998        | DHS              | 9,909       | 400                               | 0                  | 19614    | Yes           |
| Ghana             | 2000        | Census           | 883,037     | 329                               | 110                | 38508    | Yes           |
| Ghana             | 2003        | DHS              | 11,308      | 410                               | 0                  | 19627    | Yes           |
| Ghana             | 2006        | UNICEF MICS      | 11,958      | 286                               | 10                 | 4694     | Yes           |
| Ghana             | 2007        | Country-specific | 9,651       | 338                               | 338                | 21173    | No            |
| Ghana             | 2007        | UNICEF MICS      | 23,387      | 129                               | 4                  | 160576†  | Yes           |
| Ghana             | 2008        | DHS              | 20,747      | 404                               | 0                  | 21188    | Yes           |
| Ghana             | 2010        | UNICEF MICS      | 2,689       | 5                                 | 0                  | 56241    | No            |
| Ghana             | 2010        | Census           | 1,217,176   | 366                               | 169                | 151306   | Yes           |
| Ghana             | 2011        | UNICEF MICS      | 19,387      | 741                               | 0                  | 63993    | Yes           |
| Ghana             | 2012        | Country-specific | 25,661      | 286                               | 10                 | 165101   | No            |
| Ghana             | 2014        | DHS              | 18,917      | 423                               | 0                  | 157027   | Yes           |

| Country       | Source Year | Source           | Sample Size | Number of geo-positioned clusters | Number of polygons | GHDx ID* | In Last Paper |
|---------------|-------------|------------------|-------------|-----------------------------------|--------------------|----------|---------------|
| Ghana         | 2016        | DHS MIS          | 4,934       | 192                               | 0                  | 286788   | No            |
| Ghana         | 2017        | DHS              | 49,231      | 897                               | 0                  | 218572   | No            |
| Guatemala     | 1998        | DHS              | 6,021       | 136                               | 8                  | 19656    | No            |
| Guatemala     | 2008        | CDC RHS          | 19,934      | 142                               | 22                 | 4779     | No            |
| Guatemala     | 2015        | DHS              | 49,309      | 853                               | 0                  | 157031   | No            |
| Guinea        | 1999        | DHS              | 13,663      | 293                               | 0                  | 19670    | Yes           |
| Guinea        | 2005        | DHS              | 14,602      | 291                               | 0                  | 19683    | Yes           |
| Guinea        | 2012        | DHS              | 17,351      | 300                               | 0                  | 69761    | Yes           |
| Guinea        | 2016        | UNICEF MICS      | 19,426      | 294                               | 8                  | 303458   | No            |
| Guinea-Bissau | 2006        | UNICEF MICS      | 18,308      | 43                                | 9                  | 4818     | Yes           |
| Guinea-Bissau | 2010        | UNICEF MICS      | 8,642       | 44                                | 9                  | 27215    | No            |
| Guinea-Bissau | 2000        | UNICEF MICS      | 35,060      | 0                                 | 9                  | 4808     | Yes           |
| Guyana        | 2000        | UNICEF MICS      | 9,695       | 164                               | 10                 | 4916     | No            |
| Guyana        | 2005        | DHS AIS          | 5,366       | 123                               | 9                  | 4837     | No            |
| Guyana        | 2006        | UNICEF MICS      | 10,194      | 164                               | 10                 | 4926     | No            |
| Guyana        | 2009        | DHS              | 9,819       | 312                               | 0                  | 21348    | No            |
| Guyana        | 2014        | UNICEF MICS      | 10,795      | 250                               | 0                  | 200598   | No            |
| Haiti         | 2000        | DHS              | 20,447      | 317                               | 0                  | 19708    | No            |
| Haiti         | 2003        | Census           | 423,707     | 54                                | 42                 | 106473   | No            |
| Haiti         | 2005        | DHS              | 20,550      | 332                               | 0                  | 19720    | No            |
| Haiti         | 2012        | DHS              | 27,806      | 437                               | 0                  | 65118    | No            |
| Haiti         | 2016        | Country-specific | 27,683      | 450                               | 0                  | 218574   | No            |
| Honduras      | 2001        | CDC RHS          | 8,362       | 122                               | 16                 | 27551    | No            |
| Honduras      | 2001        | Census           | 284,269     | 184                               | 111                | 367563   | No            |
| Honduras      | 2005        | DHS              | 42,752      | 123                               | 16                 | 19728    | No            |
| Honduras      | 2011        | DHS              | 48,459      | 1,127                             | 0                  | 95440    | No            |
| India         | 1998        | DHS              | 262,816     | 3,212                             | 440                | 19950    | No            |
| India         | 1999        | Census           | 310,057     | 4,096                             | 505                | 5294     | No            |
| India         | 2004        | Country-specific | 111,951     | 3,009                             | 363                | 26919    | No            |
| India         | 2004        | Census           | 317,120     | 4,157                             | 582                | 152602   | No            |
| India         | 2005        | DHS              | 275,927     | 3,982                             | 29                 | 19963    | No            |
| India         | 2007        | Country-specific | 240,192     | 3,629                             | 34                 | 80778†   | No            |
| India         | 2009        | Country-specific | 248,714     | 3,581                             | 574                | 74309†   | No            |
| India         | 2009        | Census           | 252,381     | 4,177                             | 608                | 294537   | No            |
| India         | 2011        | Country-specific | 249,185     | 3,718                             | 585                | 129718†  | No            |
| India         | 2014        | Country-specific | 177,150     | 4,226                             | 624                | 225626†  | No            |
| India         | 2015        | DHS              | 1,474,786   | 28,392                            | 0                  | 157050   | No            |
| Indonesia     | 2002        | DHS              | 77,331      | 1,318                             | 0                  | 20011    | No            |
| Indonesia     | 2002        | Country-specific | 77,149      | 1,315                             | 0                  | 20040    | No            |

| Country    | Source Year | Source           | Sample Size | Number of geo-positioned clusters | Number of polygons | GHDx ID* | In Last Paper |
|------------|-------------|------------------|-------------|-----------------------------------|--------------------|----------|---------------|
| Indonesia  | 2005        | Census           | 602,727     | 2,338                             | 413                | 56573    | No            |
| Indonesia  | 2007        | DHS              | 94,683      | 2,191                             | 33                 | 20021    | No            |
| Indonesia  | 2010        | Census           | 12,982,214  | 2,450                             | 492                | 56558    | No            |
| Indonesia  | 2012        | DHS              | 97,326      | 2,191                             | 33                 | 76705    | No            |
| Indonesia  | 2014        | Country-specific | 518,893     | 2,283                             | 444                | 165186†  | No            |
| Indonesia  | 2015        | Country-specific | 519,674     | 2,357                             | 448                | 238332†  | No            |
| Indonesia  | 2016        | Country-specific | 531,330     | 2,366                             | 449                | 282087†  | No            |
| Indonesia  | 2011        | UNICEF MICS      | 5,324       | 51                                | 3                  | 104042   | No            |
| Indonesia  | 2011        | UNICEF MICS      | 5,653       | 206                               | 3                  | 104043   | No            |
| Iran       | 2006        | Census           | 758,931     | 2,404                             | 332                | 39396    | No            |
| Iran       | 2011        | Census           | 871,433     | 2,433                             | 391                | 294570   | No            |
| Iran       | 2016        | Country-specific | 901,570     | 2,452                             | 429                | 299134†  | No            |
| Iraq       | 2000        | UNICEF MICS      | 45,695      | 599                               | 18                 | 7054     | No            |
| Iraq       | 2006        | UNICEF MICS      | 55,760      | 609                               | 18                 | 7028     | No            |
| Iraq       | 2006        | Country-specific | 61,818      | 536                               | 19                 | 34524    | No            |
| Iraq       | 2011        | UNICEF MICS      | 114,043     | 612                               | 48                 | 76707    | No            |
| Jamaica    | 2001        | Census           | 100,631     | 19                                | 14                 | 39450    | No            |
| Jamaica    | 2002        | CDC RHS          | 7,080       | 19                                | 14                 | 7161†    | No            |
| Jamaica    | 2005        | UNICEF MICS      | 7,708       | 19                                | 14                 | 7149     | No            |
| Jamaica    | 2011        | UNICEF MICS      | 9,769       | 19                                | 14                 | 141336   | No            |
| Jordan     | 2002        | DHS              | 23,195      | 495                               | 0                  | 20073    | No            |
| Jordan     | 2007        | DHS              | 42,395      | 926                               | 0                  | 20083    | No            |
| Jordan     | 2009        | DHS              | 38,154      | 127                               | 12                 | 21206    | No            |
| Jordan     | 2012        | DHS              | 41,999      | 806                               | 0                  | 77517    | No            |
| Kenya      | 1998        | DHS              | 16,146      | 526                               | 0                  | 20132    | Yes           |
| Kenya      | 1999        | Country-specific | 1,343,800   | 6,590                             | 0                  | 153943   | No            |
| Kenya      | 2000        | UNICEF MICS      | 19,071      | 870                               | 0                  | 7387     | Yes           |
| Kenya      | 2003        | DHS              | 17,357      | 399                               | 0                  | 20145    | Yes           |
| Kenya      | 2005        | Country-specific | 31,005      | 1,339                             | 0                  | 7375†    | No            |
| Kenya      | 2007        | Country-specific | 14,698      | 385                               | 0                  | 133219   | No            |
| Kenya      | 2008        | UNICEF MICS      | 30,220      | 590                               | 0                  | 7401     | No            |
| Kenya      | 2008        | DHS              | 16,853      | 397                               | 0                  | 21365    | Yes           |
| Kenya      | 2009        | Census           | 1,811,545   | 725                               | 158                | 106512   | No            |
| Kenya      | 2010        | Country-specific | 6,442       | 119                               | 0                  | 157397   | No            |
| Kenya      | 2012        | Country-specific | 10,703      | 365                               | 0                  | 133304   | No            |
| Kenya      | 2014        | DHS              | 66,501      | 1,584                             | 0                  | 157057   | Yes           |
| Kenya      | 2011        | UNICEF MICS      | 11,479      | 264                               | 0                  | 135416   | No            |
| Kyrgyzstan | 2005        | UNICEF MICS      | 13,082      | 306                               | 8                  | 7540     | No            |
| Kyrgyzstan | 2009        | Census           | 316,765     | 334                               | 56                 | 106520   | No            |

| Country           | Source Year | Source           | Sample Size | Number of geo-positioned clusters | Number of polygons | GHDx ID* | In Last Paper |
|-------------------|-------------|------------------|-------------|-----------------------------------|--------------------|----------|---------------|
| <b>Kyrgyzstan</b> | 2012        | DHS              | 16,227      | 314                               | 0                  | 77518    | No            |
| <b>Kyrgyzstan</b> | 2014        | UNICEF MICS      | 13,897      | 307                               | 9                  | 162283   | No            |
| <b>Laos</b>       | 2000        | UNICEF MICS      | 17,403      | 265                               | 0                  | 7618     | No            |
| <b>Laos</b>       | 2006        | UNICEF MICS      | 15,400      | 300                               | 0                  | 7629     | No            |
| <b>Laos</b>       | 2011        | UNICEF MICS      | 47,017      | 294                               | 17                 | 103973   | No            |
| <b>Laos</b>       | 2017        | UNICEF MICS      | 51,897      | 294                               | 18                 | 375362   | No            |
| <b>Lesotho</b>    | 2000        | UNICEF MICS      | 15,029      | 44                                | 10                 | 7721     | No            |
| <b>Lesotho</b>    | 2004        | DHS              | 18,459      | 381                               | 0                  | 20167    | Yes           |
| <b>Lesotho</b>    | 2006        | Census           | 94,211      | 81                                | 63                 | 367585   | No            |
| <b>Lesotho</b>    | 2009        | DHS              | 21,326      | 395                               | 0                  | 21382    | Yes           |
| <b>Lesotho</b>    | 2014        | DHS              | 19,132      | 399                               | 0                  | 157058   | Yes           |
| <b>Liberia</b>    | 2006        | DHS              | 14,274      | 291                               | 0                  | 20191    | Yes           |
| <b>Liberia</b>    | 2008        | Census           | 170,930     | 121                               | 15                 | 151310   | Yes           |
| <b>Liberia</b>    | 2011        | DHS MIS          | 3,938       | 150                               | 0                  | 56828    | No            |
| <b>Liberia</b>    | 2013        | DHS              | 19,878      | 322                               | 0                  | 77385    | Yes           |
| <b>Liberia</b>    | 2016        | DHS MIS          | 4,113       | 150                               | 0                  | 286768   | No            |
| <b>Libya</b>      | 2007        | Country-specific | 64,609      | 1,034                             | 22                 | 107340†  | No            |
| <b>Madagascar</b> | 2003        | DHS              | 17,232      | 732                               | 6                  | 20223    | Yes           |
| <b>Madagascar</b> | 2008        | DHS              | 35,938      | 585                               | 0                  | 21409    | Yes           |
| <b>Madagascar</b> | 2011        | DHS MIS          | 8,154       | 266                               | 0                  | 69806    | No            |
| <b>Madagascar</b> | 2016        | DHS MIS          | 10,655      | 743                               | 22                 | 218580   | No            |
| <b>Madagascar</b> | 2012        | UNICEF MICS      | 15,556      | 127                               | 0                  | 125594   | Yes           |
| <b>Malawi</b>     | 1998        | Census           | 459,872     | 246                               | 211                | 40179    | Yes           |
| <b>Malawi</b>     | 2000        | DHS              | 27,603      | 559                               | 0                  | 20252    | Yes           |
| <b>Malawi</b>     | 2004        | DHS              | 24,770      | 520                               | 0                  | 20263    | Yes           |
| <b>Malawi</b>     | 2008        | Census           | 626,890     | 260                               | 225                | 40186    | Yes           |
| <b>Malawi</b>     | 2010        | DHS              | 46,806      | 827                               | 0                  | 21393    | Yes           |
| <b>Malawi</b>     | 2012        | DHS MIS          | 2,906       | 140                               | 0                  | 77387    | No            |
| <b>Malawi</b>     | 2013        | UNICEF MICS      | 50,323      | 127                               | 31                 | 161662   | Yes           |
| <b>Malawi</b>     | 2013        | LSMS             | 9,382       | 908                               | 0                  | 224223   | No            |
| <b>Malawi</b>     | 2015        | DHS              | 50,488      | 850                               | 0                  | 218581   | No            |
| <b>Malawi</b>     | 2017        | DHS MIS          | 3,809       | 148                               | 0                  | 286769   | No            |
| <b>Malaysia</b>   | 2000        | Census           | 222,947     | 455                               | 133                | 40785    | No            |
| <b>Mali</b>       | 1998        | Census           | 397,809     | 1,140                             | 243                | 40235    | Yes           |
| <b>Mali</b>       | 2001        | DHS              | 586         | 1,023                             | 9                  | 20315    | Yes           |
| <b>Mali</b>       | 2006        | DHS              | 29,011      | 405                               | 0                  | 20274    | Yes           |
| <b>Mali</b>       | 2009        | Census           | 606,397     | 1,143                             | 244                | 151311   | Yes           |
| <b>Mali</b>       | 2012        | DHS              | 21,571      | 413                               | 0                  | 77388    | Yes           |
| <b>Mali</b>       | 2015        | DHS MIS          | 7,758       | 177                               | 0                  | 218587   | No            |

| Country           | Source Year | Source           | Sample Size | Number of geo-positioned clusters | Number of polygons | GHDx ID* | In Last Paper |
|-------------------|-------------|------------------|-------------|-----------------------------------|--------------------|----------|---------------|
| <b>Mauritania</b> | 2000        | DHS              | 15,569      | 771                               | 13                 | 20322    | Yes           |
| <b>Mauritania</b> | 2007        | UNICEF MICS      | 23,792      | 709                               | 197                | 8115     | No            |
| <b>Mauritania</b> | 2011        | UNICEF MICS      | 24,852      | 769                               | 194                | 152783   | Yes           |
| <b>Mauritania</b> | 2015        | UNICEF MICS      | 26,627      | 771                               | 13                 | 267343   | No            |
| <b>Mexico</b>     | 2000        | Country-specific | 4,928,871   | 4,220                             | 2,437              | 8634     | No            |
| <b>Mexico</b>     | 2002        | Country-specific | 1,078       | 442                               | 152                | 8672     | No            |
| <b>Mexico</b>     | 2005        | Country-specific | 103,651     | 1,508                             | 579                | 8618     | No            |
| <b>Mexico</b>     | 2005        | Census           | 5,361,887   | 4,178                             | 2,454              | 43776    | No            |
| <b>Mexico</b>     | 2006        | Country-specific | 71,412      | 2,492                             | 32                 | 23982    | No            |
| <b>Mexico</b>     | 2008        | Country-specific | 13,010      | 2,496                             | 32                 | 105286   | No            |
| <b>Mexico</b>     | 2009        | Country-specific | 180,372     | 2,493                             | 32                 | 24006    | No            |
| <b>Mexico</b>     | 2011        | Country-specific | 96,386      | 1,725                             | 710                | 81748    | No            |
| <b>Mexico</b>     | 2011        | Country-specific | 9,655       | 2,162                             | 26                 | 105291   | No            |
| <b>Mexico</b>     | 2015        | Census           | 5,788,035   | 4,139                             | 2,447              | 294574   | No            |
| <b>Mexico</b>     | 2015        | Country-specific | 235,574     | 2,692                             | 1,291              | 317752   | No            |
| <b>Mexico</b>     | 2016        | Country-specific | 10,664      | 375                               | 0                  | 316736   | No            |
| <b>Mongolia</b>   | 2000        | Census           | 132,808     | 2,137                             | 63                 | 40796    | No            |
| <b>Mongolia</b>   | 2005        | UNICEF MICS      | 15,003      | 2,113                             | 22                 | 8777     | No            |
| <b>Mongolia</b>   | 2008        | Country-specific | 3,575       | 3                                 | 1                  | 125230   | No            |
| <b>Mongolia</b>   | 2010        | UNICEF MICS      | 19,028      | 1,507                             | 217                | 76704    | No            |
| <b>Mongolia</b>   | 2012        | UNICEF MICS      | 3,639       | 190                               | 23                 | 189045   | No            |
| <b>Mongolia</b>   | 2013        | UNICEF MICS      | 26,401      | 798                               | 527                | 150866   | No            |
| <b>Mongolia</b>   | 2016        | UNICEF MICS      | 4,221       | 190                               | 23                 | 335994   | No            |
| <b>Morocco</b>    | 2003        | DHS              | 33,874      | 480                               | 0                  | 20361    | Yes           |
| <b>Morocco</b>    | 2004        | Census           | 800,887     | 942                               | 60                 | 56492    | Yes           |
| <b>Mozambique</b> | 2003        | DHS              | 27,239      | 959                               | 11                 | 20394    | Yes           |
| <b>Mozambique</b> | 2007        | Census           | 878,780     | 1,109                             | 337                | 227143   | Yes           |
| <b>Mozambique</b> | 2011        | DHS              | 25,659      | 609                               | 0                  | 55975    | Yes           |
| <b>Myanmar</b>    | 2000        | UNICEF MICS      | 70,574      | 841                               | 16                 | 8932     | No            |
| <b>Myanmar</b>    | 2009        | UNICEF MICS      | 70,639      | 841                               | 17                 | 90696†   | No            |
| <b>Myanmar</b>    | 2015        | DHS              | 26,487      | 441                               | 0                  | 157061   | No            |
| <b>Namibia</b>    | 2000        | DHS              | 14,459      | 259                               | 0                  | 20417    | Yes           |
| <b>Namibia</b>    | 2006        | DHS              | 19,879      | 491                               | 0                  | 20428    | Yes           |
| <b>Namibia</b>    | 2013        | DHS              | 19,929      | 549                               | 0                  | 150382   | Yes           |
| <b>Nepal</b>      | 2001        | DHS              | 21,415      | 251                               | 0                  | 20450    | No            |
| <b>Nepal</b>      | 2006        | DHS              | 20,203      | 260                               | 0                  | 20462    | No            |
| <b>Nepal</b>      | 2010        | UNICEF MICS      | 14,449      | 93                                | 24                 | 39999    | No            |
| <b>Nepal</b>      | 2011        | DHS              | 23,631      | 289                               | 0                  | 21240    | No            |
| <b>Nepal</b>      | 2014        | UNICEF MICS      | 27,236      | 510                               | 0                  | 162317   | No            |

| Country                 | Source Year | Source           | Sample Size | Number of geo-positioned clusters | Number of polygons | GHDx ID* | In Last Paper |
|-------------------------|-------------|------------------|-------------|-----------------------------------|--------------------|----------|---------------|
| <b>Nepal</b>            | 2016        | DHS              | 23,145      | 383                               | 0                  | 286782   | No            |
| <b>Nicaragua</b>        | 2001        | DHS              | 28,775      | 224                               | 132                | 20487    | No            |
| <b>Nicaragua</b>        | 2005        | Census           | 262,017     | 193                               | 93                 | 56520    | No            |
| <b>Nicaragua</b>        | 2006        | CDC RHS          | 14,116      | 226                               | 140                | 9270     | No            |
| <b>Nicaragua</b>        | 2011        | Country-specific | 46,952      | 211                               | 133                | 126952   | No            |
| <b>Niger</b>            | 1998        | DHS              | 14,837      | 268                               | 0                  | 20537    | Yes           |
| <b>Niger</b>            | 2000        | UNICEF MICS      | 11,040      | 1,123                             | 8                  | 9439     | Yes           |
| <b>Niger</b>            | 2006        | DHS              | 17,754      | 1,123                             | 8                  | 20499    | Yes           |
| <b>Niger</b>            | 2012        | DHS              | 21,903      | 1,123                             | 8                  | 74393    | Yes           |
| <b>Nigeria</b>          | 1999        | UNICEF MICS      | 36,017      | 1,094                             | 31                 | 9506     | No            |
| <b>Nigeria</b>          | 2003        | DHS              | 15,909      | 360                               | 0                  | 20567    | Yes           |
| <b>Nigeria</b>          | 2007        | UNICEF MICS      | 54,390      | 1,097                             | 37                 | 9516     | Yes           |
| <b>Nigeria</b>          | 2007        | Census           | 37,777      | 1,097                             | 37                 | 151312   | Yes           |
| <b>Nigeria</b>          | 2008        | DHS              | 66,679      | 886                               | 0                  | 21433    | Yes           |
| <b>Nigeria</b>          | 2008        | Census           | 37,202      | 1,097                             | 37                 | 151313   | Yes           |
| <b>Nigeria</b>          | 2009        | Census           | 47,618      | 1,097                             | 37                 | 151314   | Yes           |
| <b>Nigeria</b>          | 2010        | DHS MIS          | 12,546      | 239                               | 0                  | 30991    | No            |
| <b>Nigeria</b>          | 2010        | Census           | 35,260      | 1,259                             | 626                | 151315   | No            |
| <b>Nigeria</b>          | 2010        | Census           | 34,232      | 1,097                             | 37                 | 151317   | Yes           |
| <b>Nigeria</b>          | 2011        | UNICEF MICS      | 63,833      | 1,097                             | 37                 | 76703    | No            |
| <b>Nigeria</b>          | 2013        | DHS              | 75,764      | 889                               | 0                  | 77390    | Yes           |
| <b>Nigeria</b>          | 2015        | DHS MIS          | 15,673      | 322                               | 0                  | 218590   | No            |
| <b>Nigeria</b>          | 2016        | UNICEF MICS      | 67,553      | 2,150                             | 0                  | 218613   | No            |
| <b>Pakistan</b>         | 1998        | Country-specific | 2,481       | 1,162                             | 7                  | 9658†    | No            |
| <b>Pakistan</b>         | 1998        | Census           | 5,975,006   | 1,036                             | 27                 | 41099    | No            |
| <b>Pakistan</b>         | 2001        | Country-specific | 14,368      | 1,124                             | 6                  | 9720†    | No            |
| <b>Pakistan</b>         | 2006        | DHS              | 33,089      | 956                               | 0                  | 20595    | No            |
| <b>Pakistan</b>         | 2011        | UNICEF MICS      | 298,466     | 337                               | 145                | 104236   | No            |
| <b>Pakistan</b>         | 2012        | DHS              | 46,512      | 1,109                             | 6                  | 77521    | No            |
| <b>Pakistan</b>         | 2014        | UNICEF MICS      | 121,646     | 297                               | 36                 | 236266   | No            |
| <b>Pakistan</b>         | 2017        | DHS              | 40,066      | 995                               | 123                | 286783   | No            |
| <b>Palestine</b>        | 2004        | Country-specific | 15,337      | 9                                 | 2                  | 20596†   | No            |
| <b>Palestine</b>        | 2010        | UNICEF MICS      | 39,814      | 18                                | 16                 | 125591   | No            |
| <b>Palestine</b>        | 2014        | UNICEF MICS      | 28,366      | 18                                | 16                 | 161590   | No            |
| <b>Panama</b>           | 2000        | Census           | 149,425     | 105                               | 38                 | 40907    | No            |
| <b>Panama</b>           | 2010        | Census           | 179,003     | 106                               | 39                 | 106529   | No            |
| <b>Panama</b>           | 2013        | UNICEF MICS      | 18,960      | 90                                | 12                 | 161587   | No            |
| <b>Papua New Guinea</b> | 2000        | Country-specific | 2,569,236   | 549                               | 20                 | 58191†   | No            |

| Country                      | Source Year | Source           | Sample Size | Number of geo-positioned clusters | Number of polygons | GHDx ID* | In Last Paper |
|------------------------------|-------------|------------------|-------------|-----------------------------------|--------------------|----------|---------------|
| <b>Papua New Guinea</b>      | 2000        | Census           | 257,478     | 589                               | 87                 | 367640   | No            |
| <b>Papua New Guinea</b>      | 2006        | DHS              | 22,344      | 654                               | 0                  | 44870†   | No            |
| <b>Paraguay</b>              | 2002        | Census           | 250,883     | 524                               | 96                 | 227167   | No            |
| <b>Paraguay</b>              | 2016        | UNICEF MICS      | 15,317      | 476                               | 9                  | 324470   | No            |
| <b>Peru</b>                  | 2000        | DHS              | 62,235      | 1,408                             | 0                  | 20649    | No            |
| <b>Peru</b>                  | 2003        | DHS              | 69,409      | 1,409                             | 0                  | 275090   | No            |
| <b>Peru</b>                  | 2007        | Census           | 1,456,206   | 1,609                             | 175                | 41267    | No            |
| <b>Peru</b>                  | 2009        | DHS              | 51,622      | 1,131                             | 0                  | 270404   | No            |
| <b>Peru</b>                  | 2010        | DHS              | 49,849      | 1,536                             | 24                 | 270469   | No            |
| <b>Peru</b>                  | 2011        | DHS              | 48,474      | 1,536                             | 24                 | 270470   | No            |
| <b>Peru</b>                  | 2012        | DHS              | 51,269      | 1,536                             | 24                 | 270471   | No            |
| <b>Peru</b>                  | 2013        | DHS              | 48,677      | 1,536                             | 24                 | 146860   | No            |
| <b>Peru</b>                  | 2013        | DHS              | 48,731      | 1,535                             | 25                 | 210231   | No            |
| <b>Peru</b>                  | 2014        | DHS              | 52,859      | 1,536                             | 24                 | 209930   | No            |
| <b>Peru</b>                  | 2014        | DHS              | 52,867      | 1,241                             | 0                  | 210182   | No            |
| <b>Philippines</b>           | 1998        | DHS              | 31,562      | 386                               | 82                 | 20683    | No            |
| <b>Philippines</b>           | 2000        | Census           | 3,613,086   | 1,291                             | 1,235              | 41296    | No            |
| <b>Philippines</b>           | 2003        | DHS              | 30,571      | 815                               | 0                  | 20699    | No            |
| <b>Philippines</b>           | 2008        | DHS              | 30,285      | 789                               | 0                  | 21421    | No            |
| <b>Philippines</b>           | 2010        | Census           | 4,900,544   | 1,355                             | 1,308              | 367607   | No            |
| <b>Philippines</b>           | 2013        | DHS              | 35,860      | 350                               | 17                 | 142943   | No            |
| <b>Philippines</b>           | 2017        | DHS              | 56,473      | 1,212                             | 0                  | 337877   | No            |
| <b>Republic of the Congo</b> | 2005        | DHS              | 15,007      | 406                               | 12                 | 19391    | Yes           |
| <b>Republic of the Congo</b> | 2009        | DHS AIS          | 13,363      | 406                               | 12                 | 3133     | No            |
| <b>Republic of the Congo</b> | 2011        | DHS              | 22,063      | 406                               | 12                 | 56151    | Yes           |
| <b>Republic of the Congo</b> | 2014        | UNICEF MICS      | 22,785      | 369                               | 11                 | 234733   | No            |
| <b>Rwanda</b>                | 2000        | DHS              | 20,023      | 36                                | 12                 | 20722    | Yes           |
| <b>Rwanda</b>                | 2000        | UNICEF MICS      | 9,450       | 36                                | 12                 | 26930    | Yes           |
| <b>Rwanda</b>                | 2002        | Census           | 364,889     | 107                               | 104                | 42432    | Yes           |
| <b>Rwanda</b>                | 2005        | DHS              | 21,280      | 456                               | 0                  | 20740    | Yes           |
| <b>Rwanda</b>                | 2010        | DHS              | 25,859      | 492                               | 0                  | 56040    | Yes           |
| <b>Rwanda</b>                | 2011        | Country-specific | 3,448       | 31                                | 5                  | 56426    | No            |
| <b>Rwanda</b>                | 2012        | DHS MIS          | 5,118       | 31                                | 5                  | 77391    | No            |
| <b>Rwanda</b>                | 2012        | Census           | 477,969     | 41                                | 29                 | 367645   | No            |
| <b>Rwanda</b>                | 2014        | DHS              | 25,563      | 492                               | 0                  | 157063   | Yes           |
| <b>Rwanda</b>                | 2017        | DHS MIS          | 5,008       | 43                                | 30                 | 350836   | No            |



| Country                      | Source Year | Source           | Sample Size | Number of geo-positioned clusters | Number of polygons | GHDx ID* | In Last Paper |
|------------------------------|-------------|------------------|-------------|-----------------------------------|--------------------|----------|---------------|
| <b>São Tomé and Príncipe</b> | 2000        | UNICEF MICS      | 6,352       | 4                                 | 4                  | 27055    | Yes           |
| <b>São Tomé and Príncipe</b> | 2008        | DHS              | 5,807       | 7                                 | 7                  | 26866    | Yes           |
| <b>São Tomé and Príncipe</b> | 2014        | UNICEF MICS      | 5,811       | 7                                 | 7                  | 214640   | Yes           |
| <b>Senegal</b>               | 1999        | DHS              | 17,188      | 165                               | 10                 | 20786    | No            |
| <b>Senegal</b>               | 2000        | UNICEF MICS      | 25,780      | 241                               | 10                 | 27044    | Yes           |
| <b>Senegal</b>               | 2002        | Census           | 471,859     | 254                               | 34                 | 43142    | Yes           |
| <b>Senegal</b>               | 2005        | DHS              | 28,417      | 366                               | 0                  | 26855    | Yes           |
| <b>Senegal</b>               | 2006        | DHS MIS          | 6,639       | 243                               | 11                 | 11516    | No            |
| <b>Senegal</b>               | 2009        | DHS MIS          | 19,297      | 319                               | 0                  | 11540    | No            |
| <b>Senegal</b>               | 2010        | DHS              | 30,888      | 385                               | 0                  | 56063    | Yes           |
| <b>Senegal</b>               | 2012        | DHS              | 17,231      | 200                               | 0                  | 111432   | Yes           |
| <b>Senegal</b>               | 2014        | DHS              | 15,876      | 197                               | 0                  | 191270   | Yes           |
| <b>Senegal</b>               | 2015        | DHS              | 16,637      | 214                               | 0                  | 218592   | Yes           |
| <b>Senegal</b>               | 2016        | DHS              | 16,567      | 214                               | 0                  | 286772   | Yes           |
| <b>Sierra Leone</b>          | 2000        | UNICEF MICS      | 10,764      | 86                                | 4                  | 11639    | Yes           |
| <b>Sierra Leone</b>          | 2004        | Census           | 234,719     | 136                               | 100                | 11661    | Yes           |
| <b>Sierra Leone</b>          | 2005        | UNICEF MICS      | 18,478      | 93                                | 14                 | 11649    | No            |
| <b>Sierra Leone</b>          | 2008        | DHS              | 15,720      | 350                               | 0                  | 21258    | Yes           |
| <b>Sierra Leone</b>          | 2010        | UNICEF MICS      | 29,820      | 93                                | 14                 | 76700    | Yes           |
| <b>Sierra Leone</b>          | 2013        | DHS              | 31,760      | 435                               | 0                  | 131467   | Yes           |
| <b>Sierra Leone</b>          | 2016        | DHS MIS          | 8,463       | 93                                | 14                 | 286773   | No            |
| <b>Somalia</b>               | 2006        | UNICEF MICS      | 13,529      | 751                               | 18                 | 11774    | Yes           |
| <b>Somalia</b>               | 2011        | UNICEF MICS      | 11,969      | 245                               | 0                  | 91507    | Yes           |
| <b>Somalia</b>               | 2011        | UNICEF MICS      | 10,782      | 276                               | 0                  | 91508    | No            |
| <b>South Africa</b>          | 1998        | Country-specific | 41,551      | 1,609                             | 9                  | 12105    | No            |
| <b>South Africa</b>          | 1998        | DHS              | 23,502      | 1,609                             | 9                  | 20796    | Yes           |
| <b>South Africa</b>          | 2001        | Census           | 24,330,578  | 1,785                             | 354                | 12144†   | No            |
| <b>South Africa</b>          | 2001        | Census           | 1,994,695   | 1,635                             | 53                 | 43152    | Yes           |
| <b>South Africa</b>          | 2002        | Country-specific | 53,175      | 1,609                             | 9                  | 115481   | No            |
| <b>South Africa</b>          | 2003        | Country-specific | 68,433      | 1,609                             | 9                  | 11787    | No            |
| <b>South Africa</b>          | 2004        | Country-specific | 51,149      | 1,609                             | 9                  | 11788    | No            |
| <b>South Africa</b>          | 2005        | Country-specific | 55,627      | 1,609                             | 9                  | 11789    | No            |
| <b>South Africa</b>          | 2006        | Country-specific | 55,213      | 1,609                             | 9                  | 115486   | No            |
| <b>South Africa</b>          | 2007        | Country-specific | 56,909      | 1,609                             | 9                  | 11790    | No            |
| <b>South Africa</b>          | 2007        | Census           | 500,790     | 1,632                             | 52                 | 43158    | Yes           |
| <b>South Africa</b>          | 2008        | Country-specific | 49,139      | 1,609                             | 9                  | 115488   | No            |
| <b>South Africa</b>          | 2009        | Country-specific | 48,561      | 1,609                             | 9                  | 115489   | No            |
| <b>South Africa</b>          | 2010        | Country-specific | 49,421      | 1,609                             | 9                  | 115490   | No            |

| Country      | Source Year | Source           | Sample Size | Number of geo-positioned clusters | Number of polygons | GHDx ID* | In Last Paper |
|--------------|-------------|------------------|-------------|-----------------------------------|--------------------|----------|---------------|
| South Africa | 2011        | Census           | 2,332,162   | 1,631                             | 52                 | 227194   | Yes           |
| South Africa | 2013        | Country-specific | 40,494      | 1,609                             | 9                  | 162652   | No            |
| South Africa | 2014        | Country-specific | 45,845      | 1,609                             | 9                  | 238485   | No            |
| South Africa | 2016        | DHS              | 19,156      | 741                               | 0                  | 157064   | No            |
| South Africa | 2016        | Country-specific | 1,699,197   | 1,718                             | 212                | 280803   | No            |
| South Africa | 2016        | Country-specific | 36,984      | 1,609                             | 9                  | 317089   | No            |
| South Sudan  | 2010        | UNICEF MICS      | 20,531      | 748                               | 10                 | 32189    | No            |
| Sudan        | 2008        | Census           | 542,765     | 0                                 | 72                 | 106548   | Yes           |
| Sudan        | 2000        | UNICEF MICS      | 65,449      | 2,257                             | 16                 | 12243    | No            |
| Sudan        | 2008        | Census           | 2,253,065   | 2,291                             | 126                | 43167    | No            |
| Sudan        | 2010        | UNICEF MICS      | 35,181      | 2,244                             | 15                 | 153643   | No            |
| Sudan        | 2014        | UNICEF MICS      | 40,931      | 2,272                             | 18                 | 200617   | No            |
| Suriname     | 1999        | UNICEF MICS      | 8,736       | 118                               | 10                 | 12280    | No            |
| Suriname     | 2010        | UNICEF MICS      | 13,479      | 118                               | 10                 | 81203    | No            |
| Swaziland    | 2000        | UNICEF MICS      | 10,177      | 24                                | 4                  | 12320    | Yes           |
| Swaziland    | 2006        | DHS              | 9,941       | 270                               | 0                  | 20829    | Yes           |
| Swaziland    | 2010        | UNICEF MICS      | 9,150       | 24                                | 4                  | 30325    | Yes           |
| Swaziland    | 2014        | UNICEF MICS      | 9,597       | 24                                | 4                  | 200707   | No            |
| Tajikistan   | 1999        | Country-specific | 4,961       | 213                               | 5                  | 12455    | No            |
| Tajikistan   | 2000        | UNICEF MICS      | 12,421      | 213                               | 5                  | 12595    | No            |
| Tajikistan   | 2005        | UNICEF MICS      | 20,685      | 213                               | 5                  | 12608    | No            |
| Tajikistan   | 2007        | Country-specific | 14,866      | 261                               | 0                  | 12584    | No            |
| Tajikistan   | 2012        | DHS              | 18,876      | 343                               | 0                  | 74460    | No            |
| Tajikistan   | 2017        | DHS              | 21,576      | 365                               | 0                  | 341838   | No            |
| Tanzania     | 1999        | DHS              | 8,217       | 173                               | 0                  | 20865    | Yes           |
| Tanzania     | 2002        | Census           | 1,719,577   | 1,112                             | 129                | 43212    | Yes           |
| Tanzania     | 2003        | DHS AIS          | 14,167      | 345                               | 0                  | 12630    | No            |
| Tanzania     | 2004        | DHS              | 21,513      | 1,061                             | 26                 | 20875    | Yes           |
| Tanzania     | 2008        | DHS AIS          | 18,901      | 466                               | 0                  | 12644    | No            |
| Tanzania     | 2009        | DHS              | 20,629      | 458                               | 0                  | 21331    | Yes           |
| Tanzania     | 2011        | DHS AIS          | 21,950      | 573                               | 0                  | 77395    | No            |
| Tanzania     | 2012        | Census           | 2,054,046   | 1,129                             | 169                | 294725   | No            |
| Tanzania     | 2015        | DHS              | 27,670      | 608                               | 0                  | 218593   | Yes           |
| Thailand     | 2000        | Census           | 347,465     | 659                               | 76                 | 43231    | No            |
| Thailand     | 2005        | UNICEF MICS      | 70,730      | 623                               | 4                  | 12732    | No            |
| Thailand     | 2012        | UNICEF MICS      | 42,441      | 623                               | 5                  | 148649   | No            |
| Thailand     | 2015        | UNICEF MICS      | 49,442      | 623                               | 5                  | 296646   | No            |
| Thailand     | 2016        | UNICEF MICS      | 5,804       | 2                                 | 1                  | 331377   | No            |
| The Gambia   | 2000        | UNICEF MICS      | 10,047      | 17                                | 7                  | 3922     | Yes           |

| Country                    | Source Year | Source           | Sample Size | Number of geo-positioned clusters | Number of polygons | GHDx ID* | In Last Paper |
|----------------------------|-------------|------------------|-------------|-----------------------------------|--------------------|----------|---------------|
| <b>The Gambia</b>          | 2010        | UNICEF MICS      | 22,549      | 13                                | 5                  | 91506    | No            |
| <b>The Gambia</b>          | 2013        | DHS              | 19,751      | 36                                | 36                 | 77384    | Yes           |
| <b>Timor-Leste</b>         | 2001        | Country-specific | 1,411       | 3                                 | 2                  | 12863    | No            |
| <b>Timor-Leste</b>         | 2003        | DHS              | 10,749      | 379                               | 92                 | 20888†   | No            |
| <b>Timor-Leste</b>         | 2009        | DHS              | 27,914      | 23                                | 13                 | 21274    | No            |
| <b>Timor-Leste</b>         | 2016        | DHS              | 26,425      | 455                               | 0                  | 286785   | No            |
| <b>Togo</b>                | 2000        | UNICEF MICS      | 24,485      | 0                                 | 30                 | 12886    | Yes           |
| <b>Togo</b>                | 1998        | DHS              | 17,777      | 287                               | 0                  | 20909    | Yes           |
| <b>Togo</b>                | 2006        | UNICEF MICS      | 13,862      | 70                                | 6                  | 12896    | Yes           |
| <b>Togo</b>                | 2010        | UNICEF MICS      | 13,214      | 70                                | 6                  | 40021    | Yes           |
| <b>Togo</b>                | 2013        | DHS              | 19,238      | 330                               | 0                  | 77515    | Yes           |
| <b>Trinidad and Tobago</b> | 2000        | Census           | 59,322      | 16                                | 15                 | 294806   | No            |
| <b>Trinidad and Tobago</b> | 2006        | UNICEF MICS      | 10,000      | 15                                | 15                 | 12950    | No            |
| <b>Trinidad and Tobago</b> | 2011        | Census           | 60,902      | 16                                | 15                 | 294807   | No            |
| <b>Trinidad and Tobago</b> | 2011        | UNICEF MICS      | 9,016       | 8                                 | 5                  | 332558   | No            |
| <b>Tunisia</b>             | 2011        | UNICEF MICS      | 20,596      | 223                               | 9                  | 76709    | Yes           |
| <b>Turkmenistan</b>        | 2006        | UNICEF MICS      | 13,859      | 709                               | 6                  | 13064    | No            |
| <b>Turkmenistan</b>        | 2015        | UNICEF MICS      | 15,019      | 709                               | 6                  | 264583   | No            |
| <b>Uganda</b>              | 2000        | DHS              | 14,120      | 270                               | 0                  | 20993    | Yes           |
| <b>Uganda</b>              | 2002        | Country-specific | 1,087,339   | 318                               | 161                | 43328    | Yes           |
| <b>Uganda</b>              | 2004        | DHS AIS          | 20,039      | 256                               | 55                 | 13084†   | No            |
| <b>Uganda</b>              | 2006        | DHS              | 16,206      | 336                               | 0                  | 21014    | Yes           |
| <b>Uganda</b>              | 2011        | DHS AIS          | 20,707      | 470                               | 0                  | 55973    | No            |
| <b>Uganda</b>              | 2011        | DHS              | 18,266      | 400                               | 0                  | 56021    | Yes           |
| <b>Uganda</b>              | 2014        | DHS MIS          | 5,227       | 208                               | 0                  | 157065   | No            |
| <b>Uganda</b>              | 2016        | DHS              | 36,805      | 685                               | 0                  | 286780   | No            |
| <b>Uzbekistan</b>          | 2000        | UNICEF MICS      | 15,464      | 678                               | 5                  | 13436    | No            |
| <b>Uzbekistan</b>          | 2002        | Country-specific | 11,457      | 218                               | 0                  | 21039    | No            |
| <b>Uzbekistan</b>          | 2006        | UNICEF MICS      | 28,484      | 678                               | 6                  | 13445    | No            |
| <b>Venezuela</b>           | 2001        | Census           | 1,216,987   | 1,130                             | 237                | 43412    | No            |
| <b>Vietnam</b>             | 1999        | Census           | 1,277,625   | 429                               | 61                 | 43718    | No            |
| <b>Vietnam</b>             | 2000        | UNICEF MICS      | 18,652      | 403                               | 8                  | 13708    | No            |
| <b>Vietnam</b>             | 2002        | DHS              | 17,216      | 273                               | 41                 | 21058    | No            |
| <b>Vietnam</b>             | 2004        | Country-specific | 18,657      | 431                               | 64                 | 13693†   | No            |
| <b>Vietnam</b>             | 2005        | DHS AIS          | 14,631      | 431                               | 64                 | 13544    | No            |
| <b>Vietnam</b>             | 2006        | UNICEF MICS      | 20,230      | 405                               | 8                  | 13719    | No            |
| <b>Vietnam</b>             | 2009        | Census           | 8,192,555   | 827                               | 673                | 43726    | No            |

| Country  | Source Year | Source           | Sample Size | Number of geo-positioned clusters | Number of polygons | GHDx ID* | In Last Paper |
|----------|-------------|------------------|-------------|-----------------------------------|--------------------|----------|---------------|
| Vietnam  | 2010        | UNICEF MICS      | 24,102      | 226                               | 6                  | 57999    | No            |
| Vietnam  | 2013        | UNICEF MICS      | 20,342      | 508                               | 508                | 152735   | No            |
| Yemen    | 2006        | UNICEF MICS      | 11,917      | 175                               | 21                 | 13816    | Yes           |
| Yemen    | 2012        | Country-specific | 62,650      | 165                               | 19                 | 249499   | No            |
| Yemen    | 2013        | DHS              | 55,227      | 175                               | 21                 | 112500   | No            |
| Zambia   | 1999        | UNICEF MICS      | 18,627      | 892                               | 70                 | 14122    | No            |
| Zambia   | 2000        | Country-specific | 459,953     | 968                               | 150                | 151325   | Yes           |
| Zambia   | 2001        | DHS              | 519         | 896                               | 9                  | 21102    | Yes           |
| Zambia   | 2002        | DHS              | 11,048      | 929                               | 72                 | 27898†   | No            |
| Zambia   | 2007        | DHS              | 14,922      | 319                               | 0                  | 21117    | No            |
| Zambia   | 2010        | Country-specific | 579,018     | 968                               | 150                | 151326   | Yes           |
| Zambia   | 2013        | DHS              | 34,371      | 719                               | 0                  | 77516    | Yes           |
| Zimbabwe | 1999        | DHS              | 12,204      | 221                               | 0                  | 21151    | Yes           |
| Zimbabwe | 2005        | DHS              | 18,798      | 396                               | 0                  | 21163    | Yes           |
| Zimbabwe | 2009        | UNICEF MICS      | 23,995      | 486                               | 10                 | 35493    | Yes           |
| Zimbabwe | 2010        | DHS              | 17,967      | 393                               | 0                  | 55992    | Yes           |
| Zimbabwe | 2012        | Census           | 312,911     | 537                               | 88                 | 367747   | No            |
| Zimbabwe | 2014        | UNICEF MICS      | 29,221      | 486                               | 10                 | 152720   | Yes           |
| Zimbabwe | 2015        | DHS              | 19,947      | 400                               | 0                  | 157066   | Yes           |

\* GHDx ID = Data source unique identifier in the Global Health Data Exchange (<http://ghdx.healthdata.org/>). Additional information about each data source is available via the GHDx, including information about the data provider and links to where the data can be accessed or requested (where available). NIDs can be entered in the search bar to retrieve the record for a particular source.

† Data source is not publicly available due to restrictions by the data provider and was used under license for the current study.

### 3.1 Data excluded from model

Select data sources that were identified to contain years of education within the geographic area of interest were excluded for the following reasons: missing survey weights for areal data, missing gender variable, incomplete sampling (e.g., only a specific age range), high rates of missingness in education variables, implausible education data values, or untrustworthy data (as determined by the survey administrator or by inspection). This source was removed due to implausibly high educational attainment values around the capital city and expert opinion regarding the quality of the data. Within each source, administrative units with a sample size of one were excluded. We define high missingness as 50% of respondents missing a response for the relevant education variable. A survey was determined to have an implausible value if its spread of data for any indicator modelled was highly disparate from other surveys in the same location and similar years. A source identified for exclusion was excluded for all indicator and all age-sex combinations. All exclusions are listed in Supplementary Table 4.

**Supplementary Table 4. Excluded sources**

| Country         | Source                   | Year      | Reason for Exclusion                                                                                   | GHDx ID* |
|-----------------|--------------------------|-----------|--------------------------------------------------------------------------------------------------------|----------|
| <b>All</b>      | Gallup World Poll        | 1998–2017 | Non-representative below national level                                                                | 367574   |
| <b>All</b>      | ISSP                     | 1998–2017 | Survey dates unclear, not usable                                                                       | 142405   |
| <b>All</b>      | Afrobarometer            | 1998–2017 | Very small sample sizes, non-representative                                                            | 340004   |
| <b>All</b>      | Eurobarometer            | 1998–2017 | No stage 1 or 2 country data                                                                           | 96291    |
| <b>All</b>      | WHS                      | 1998–2017 | Geographic data unusable                                                                               | 542      |
| <b>Bhutan</b>   | Bhutan Census            | 2005      | Dropped for missingness in indicator responses                                                         | 1175     |
| <b>Brazil</b>   | National Health Survey   | 2013      | Dropped for missing weights                                                                            | 195010   |
| <b>Cambodia</b> | IPUMS Census             | 1998      | Small sample size, indicator measures not consistent with rest of data                                 | 35322    |
| <b>Cambodia</b> | IPUMS Census             | 2008      | Small sample size, indicator measures not consistent with rest of data                                 | 35329    |
| <b>Cambodia</b> | Intercensal Pop Survey   | 2004      | Small sample size, indicator measures not consistent with rest of data                                 | 2002     |
| <b>Cambodia</b> | Labor Force Survey       | 2000      | Mean educational attainment estimates unrealistically high                                             | 282112   |
| <b>Cambodia</b> | IPUMS Census             | 1998      | Zero proportion estimate unrealistically high                                                          | 35322    |
| <b>China</b>    | WB STEP Household Survey | 2012      | Dropped for missing weights                                                                            | 298372   |
| <b>China</b>    | IPUMS Census             | 2000      | Mean educational attainment estimates unrealistically low                                              | 294255   |
| <b>Ethiopia</b> | IPUMS Census             | 2007      | Dropped for missingness in indicator responses                                                         | 227133   |
| <b>Ethiopia</b> | PMA                      | 2014      | Extremely small sample size, indicator estimates non-representative/missingness in indicator responses | 153503   |
| <b>Ethiopia</b> | PMA                      | 2014      | Extremely small sample size, indicator estimates non-representative                                    | 256175   |
| <b>Ethiopia</b> | PMA                      | 2015      | Extremely small sample size, indicator estimates non-representative                                    | 256176   |
| <b>India</b>    | Longitudinal Aging Study | 2010      | Dropped for missing weights                                                                            | 174154   |

| Country           | Source                                      | Year | Reason for Exclusion                                                   | GHDx ID* |
|-------------------|---------------------------------------------|------|------------------------------------------------------------------------|----------|
| <b>India</b>      | District Level Household Survey             | 2007 | Dropped for missingness in indicator responses                         | 23258    |
| <b>India</b>      | Global Adult Tobacco Survey                 | 2009 | Mean educational attainment estimates unrealistically high             | 21988    |
| <b>India</b>      | District Level Household Survey             | 2012 | Mean educational attainment estimates unrealistically low              | 165390   |
| <b>India</b>      | District Level Household Survey             | 2012 | Dropped for incomplete age ranges                                      | 165390   |
| <b>Indonesia</b>  | IPUMS Census                                | 2000 | Zero proportion/NA estimate unrealistically high                       | 56554    |
| <b>Indonesia</b>  | UNICEF MICS                                 | 2000 | Missingness in education variable                                      | 27009    |
| <b>Iraq</b>       | Socioeconomic Survey                        | 2012 | Dropped for missingness in indicator responses                         | 235348   |
| <b>Kenya</b>      | UNICEF MICS                                 | 2007 | Small sample size, indicator measures not consistent with rest of data | 155335   |
| <b>Kenya</b>      | Kenya AIDS Indicator Survey                 | 2012 | Dropped for incomplete age ranges                                      | 133304   |
| <b>Kenya</b>      | Kenya AIDS Indicator Survey                 | 2007 | Dropped for incomplete age ranges                                      | 133219   |
| <b>Kyrgyzstan</b> | WB LSMS                                     | 1998 | Dropped for missingness in indicator responses                         | 45989    |
| <b>Kyrgyzstan</b> | IPUMS Census                                | 1999 | Dropped for missingness in indicator responses                         | 39466    |
| <b>Kyrgyzstan</b> | UNICEF MICS                                 | 2014 | Dropped for missing weights                                            | 162283   |
| <b>Laos</b>       | UNICEF MICS                                 | 2006 | Mean educational attainment estimates unrealistically high             | 7629     |
| <b>Madagascar</b> | UNICEF MICS                                 | 2012 | Dropped for missingness in indicator responses                         | 125594   |
| <b>Malawi</b>     | WB LSMS                                     | 2013 | Inconsistent w/ Country's time trend                                   | 224223   |
| <b>Mexico</b>     | Mexico National Addiction Survey            | 2002 | Dropped for incomplete age ranges                                      | 8672     |
| <b>Mexico</b>     | IPUMS Census                                | 2005 | Dropped for incomplete age ranges                                      | 43776    |
| <b>Mexico</b>     | Mexico National Addiction Survey            | 2008 | Dropped for incomplete age ranges                                      | 105286   |
| <b>Mexico</b>     | Income and Household Expenditure Survey     | 2010 | Mean educational attainment estimates unrealistically low              | 93321    |
| <b>Nigeria</b>    | Household School and Health Facility Survey | 2005 | Mean educational attainment estimates unrealistically low              | 50393    |

| Country             | Source       | Year | Reason for Exclusion                                       | GHDx ID* |
|---------------------|--------------|------|------------------------------------------------------------|----------|
| <b>Palestine</b>    | IPUMS Census | 2007 | Dropped for missing weights                                | 41088    |
| <b>South Sudan</b>  | IPUMS Census | 2008 | Dropped for missingness in indicator responses             | 106548   |
| <b>Swaziland</b>    | UNICEF MICS  | 2000 | Mean educational attainment estimates unrealistically high | 12320    |
| <b>Tanzania</b>     | WB LSMS      | 2010 | Inconsistent w/ Country's time trend                       | 93807    |
| <b>Turkmenistan</b> | UNICEF MICS  | 2015 | Dropped for missing weights                                | 264583   |
| <b>Vietnam</b>      | WB LSMS      | 2004 | Mean educational attainment estimates unrealistically low  | 13693    |

\* GHDx ID = Data source unique identifier in the Global Health Data Exchange (<http://ghdx.healthdata.org/>). Additional information about each data source is available via the GHDx, including information about the data provider and links to where the data can be accessed or requested (where available). NIDs can be entered in the search bar to retrieve the record for a particular source.

a

Education: Africa

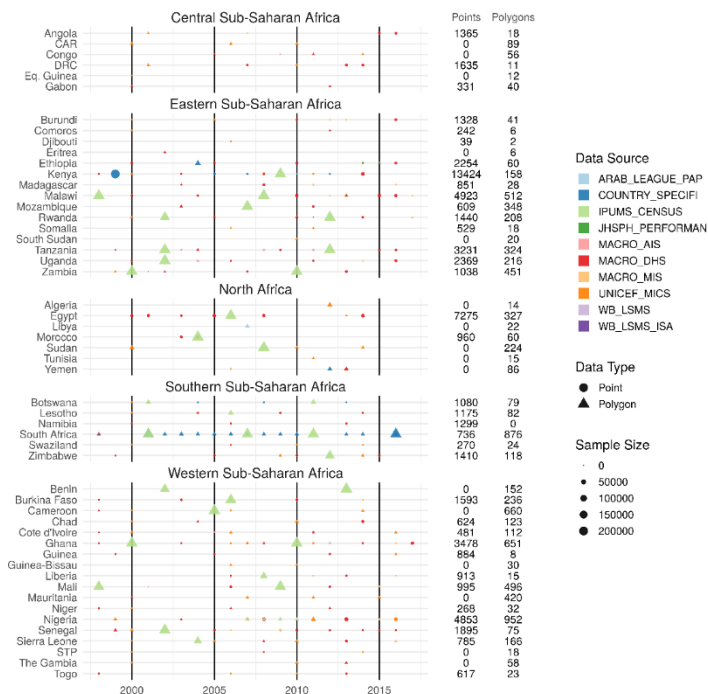

b

1998-2002

2003-2007

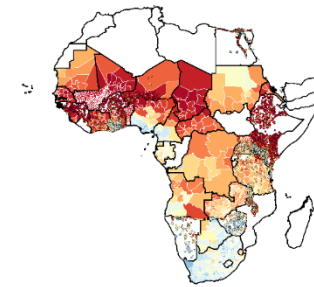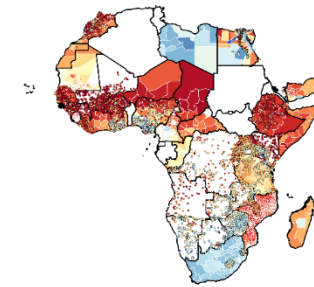

2008-2012

2013-2017

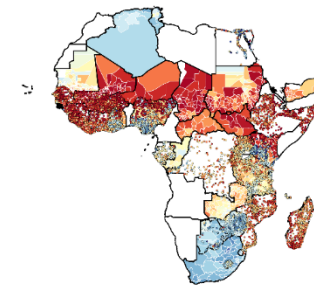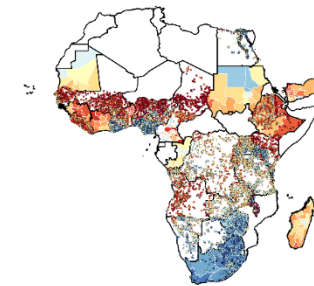

Mean Years

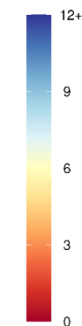

N: 32,297,632  
Points: 67,199  
Polygons: 8,778  
03/17/2019

**Supplementary Figure 1. Education data availability in Africa by type and country for women ages 15–49, 1998–2017**

5 Data are shown by country and year of survey and mapped at their corresponding geopositioned coordinate or area. All points and polygons (areal) for each country are plotted by data source, type, and sample size (a). Sample size represents the number of individual microdata records for each survey. Mean years of attainment for the input coordinate or area are mapped (b). This database consists of 67,199 clusters and 8,778 polygons.



**a**

Education: Latin America and Caribbean

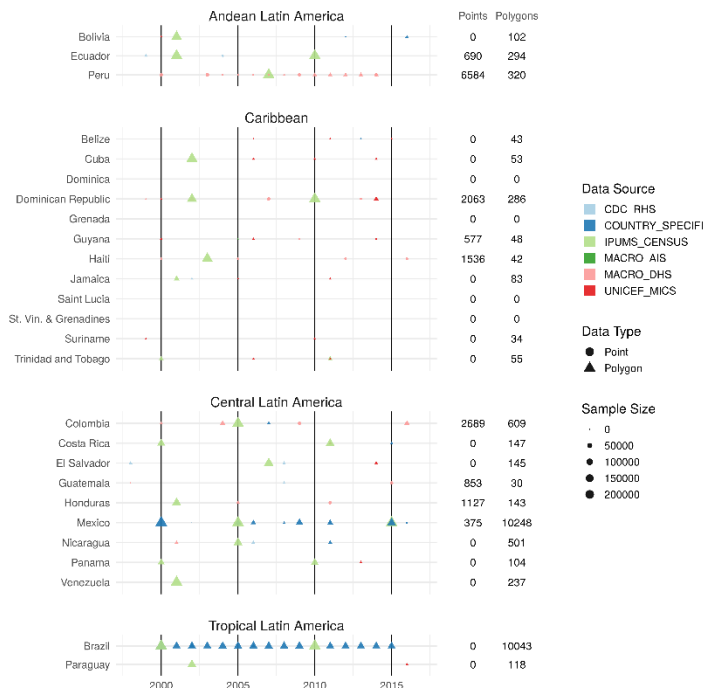

**b**

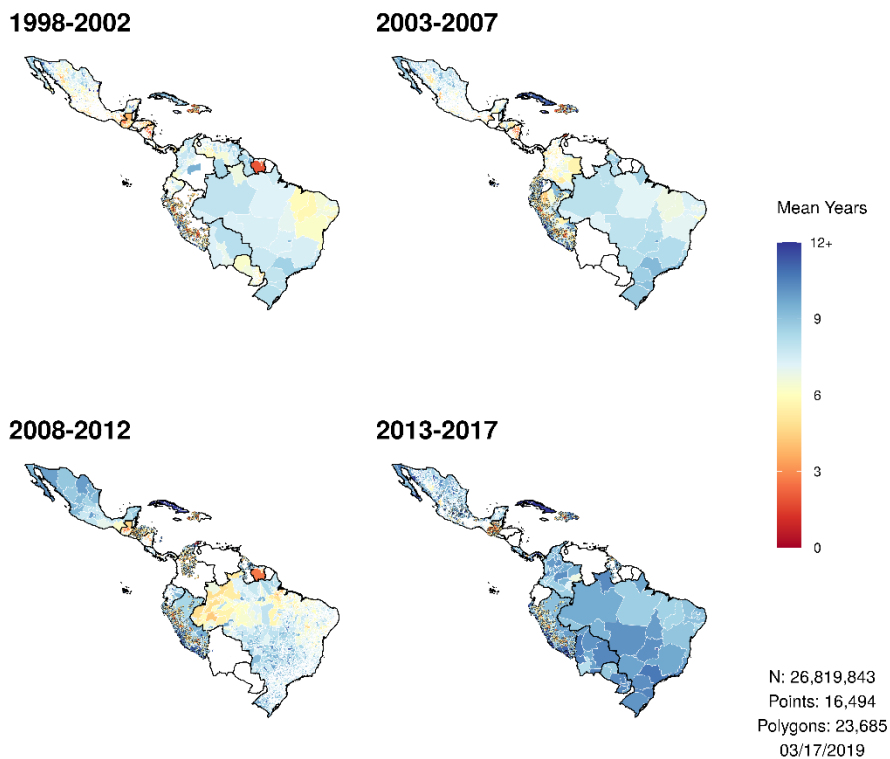

**Supplementary Figure 2. Education data availability in Latin America and the Caribbean by type and country for women ages 15–49, 1998–2017**

Data are shown by country and year of survey and mapped at their corresponding geopositioned coordinate or area. The total number of points and polygons (areal) for each country are plotted by data source, type, and sample size (a). Sample size represents the number of individual microdata records for each survey. Mean years of attainment for the input coordinate or area are mapped (b). This database consists of 16,494 clusters and 23,685 polygons.

a

## Education: Middle East and Central Asia

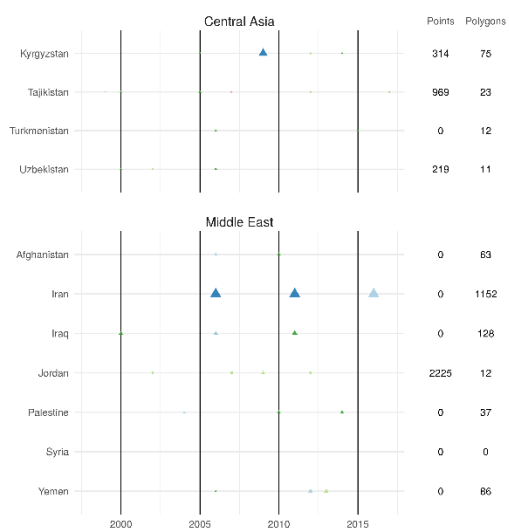

b

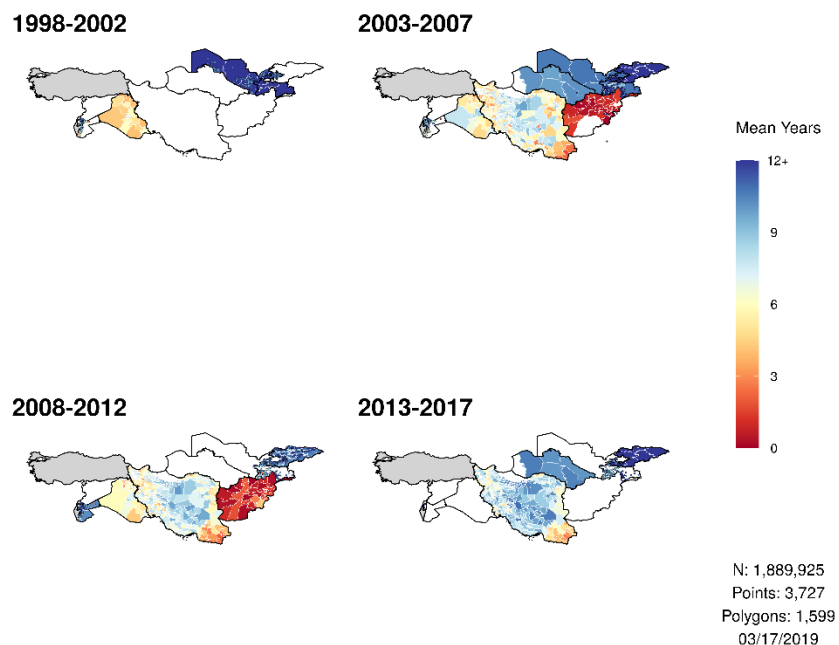

**Supplementary Figure 3. Education data availability in the Middle East and Central Asia by type and country for women ages 15–49, 1998–2017**

25 Data are shown by country and year of survey and mapped at their corresponding geopositioned coordinate or area. The total number of points and polygons (areal) for each country are plotted by data source, type, and sample size (a). Sample size represents the number of individual microdata records for each survey. Mean years of attainment for the input coordinate or area are mapped (b). This database consists of 3,727 clusters and 1,599 polygons.

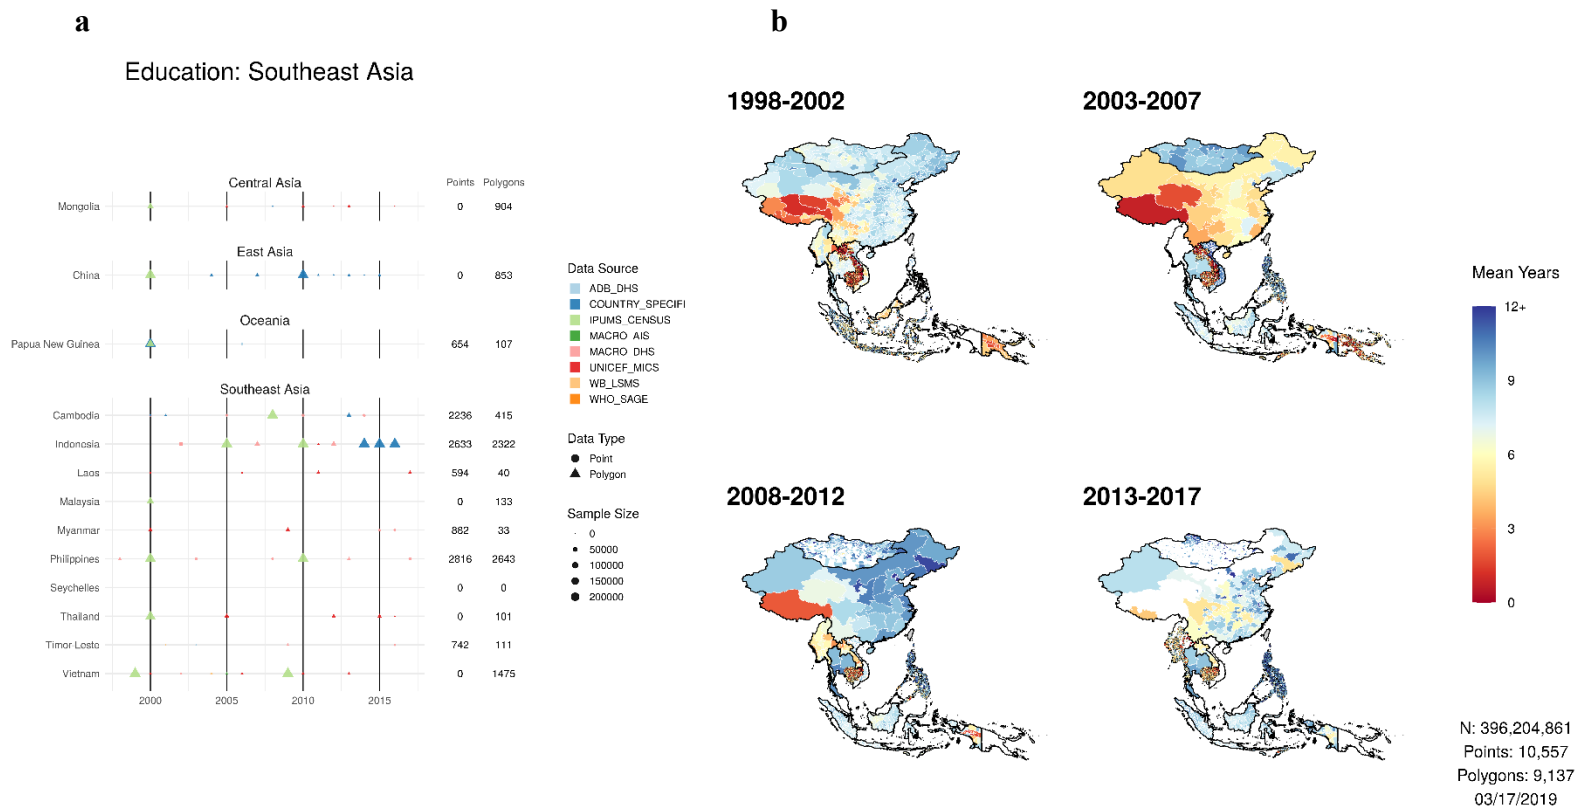

30 **Supplementary Figure 4. Education data availability in East and Southeast Asia by type and country for women ages 15–49, 1998–2017**  
 Data are shown by country and year of survey and mapped at their corresponding geopositioned coordinate or area. All points and polygons (areal) for each country are plotted by data source, type, and sample size (a). Sample size represents the number of individual microdata records for each survey. Mean years of attainment for the input coordinate or area are mapped (b). This database consists of 10,557 clusters and 9,137 polygons.

35

**a**

**b**

## Education: South Asia

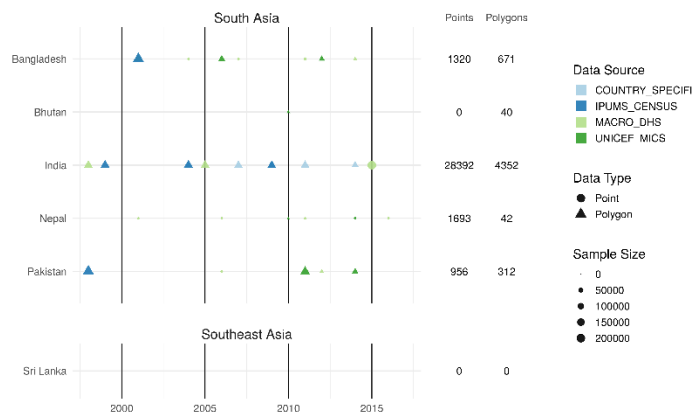

1998-2002

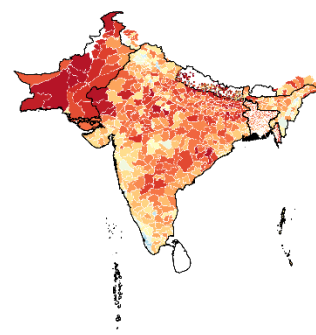

2003-2007

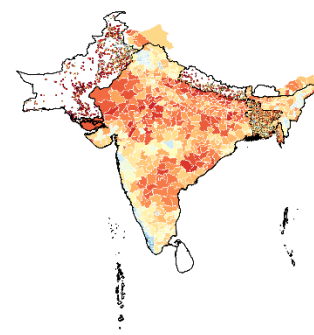

2008-2012

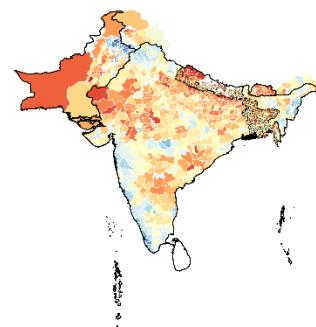

2013-2017

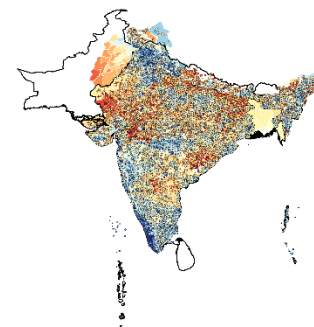

Mean Years

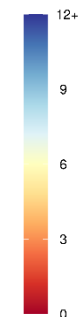

N: 8,343,276  
 Points: 32,361  
 Polygons: 5,417  
 03/17/2019

### Supplementary Figure 5. Education data availability in South Asia by type and country for women ages 15–49, 1998–2017

Data are shown by country and year of survey and mapped at their corresponding geopositioned coordinate or area. All points and polygons (areal) for each country are plotted by data source, type, and sample size (a). Sample size represents the number of individual microdata records for each survey. Mean years of attainment for the input coordinate or area are mapped (b). This database consists of 32,361 clusters and 5,417 polygons.

## 4.0 Supplementary covariates

50

A variety of socioeconomic and environmental variables were used to predict educational attainment. Where available, the finest spatio-temporal resolution of gridded data sets was used.

55

The most recent year available was substituted in for annual covariates without availability through the entire studied time period (2000–2017); the temporal availability of covariates is listed in Supplementary Table 5. One covariate raster brick, the population estimates from WorldPop, are only made available for the years 2000, 2005, 2010, and 2015. Because our model is indexed by individual year between 2000 and 2015, it is necessary for us to interpolate these population estimates between reported years. We use the exponential population growth rate calculated between each pair of years to interpolate to missing years between.

60

**Supplementary Table 5. Covariates used in mapping**

| Covariate        | Temporal resolution | Source                                     | Reference                                                                                                                                                                                                                                                                                                                                                                                                                                                  |
|------------------|---------------------|--------------------------------------------|------------------------------------------------------------------------------------------------------------------------------------------------------------------------------------------------------------------------------------------------------------------------------------------------------------------------------------------------------------------------------------------------------------------------------------------------------------|
| Aridity          | Annual (2000–2017)  | Climatic Research Unit Time-Series (CRUTS) | Harris, I., Jones, P. d., Osborn, T. j. & Lister, D. h. Updated high-resolution grids of monthly climatic observations – the CRU TS3.10 dataset. <i>Int. J. Climatol.</i> <b>34</b> , 623–642 (2014).<br><br>University of East Anglia. Climatic Research Unit TS v. 3.24 dataset. Available at: <a href="https://crudata.uea.ac.uk/cru/data/hrg/cru_ts_3.24.01/">https://crudata.uea.ac.uk/cru/data/hrg/cru_ts_3.24.01/</a> . (Accessed: 24th July 2017). |
| Irrigation       | Static              | University of Frankfurt                    | Goethe-Universität. Generation of a digital global map of irrigation areas. Available at: <a href="https://www.uni-frankfurt.de/45218039/Global_Irrigation_Map">https://www.uni-frankfurt.de/45218039/Global_Irrigation_Map</a> . (Accessed: 25th July 2017)                                                                                                                                                                                               |
| Nighttime lights | Annual (2000–2013)  | NOAA DMSP                                  | NOAA. Version 4 DMSP-OLS nighttime lights time series dataset. Available at: <a href="https://www.ngdc.noaa.gov/eog/dmsp/downloadV4composites.html">https://www.ngdc.noaa.gov/eog/dmsp/downloadV4composites.html</a> . (Accessed: 25th July 2017)                                                                                                                                                                                                          |
| Population       | Annual (2000–2017)  | WorldPop                                   | Lloyd, C. T., Sorichetta, A. & Tatem, A. J. High resolution global gridded data for use in population studies. <i>Sci. Data</i> <b>4</b> , sdata20171 (2017).<br><br>World Pop. Get data. Available at: <a href="http://www.worldpop.org.uk/data/get_data/">http://www.worldpop.org.uk/data/get_data/</a> . (Accessed: 25th July 2017)                                                                                                                     |

| Covariate                                             | Temporal resolution | Source                                                                                           | Reference                                                                                                                                                                                                                                                                                                                                                                                                                                                                                                                                                                                                                                                                                                                                                                                                                                                                                                                                                                                                                                   |
|-------------------------------------------------------|---------------------|--------------------------------------------------------------------------------------------------|---------------------------------------------------------------------------------------------------------------------------------------------------------------------------------------------------------------------------------------------------------------------------------------------------------------------------------------------------------------------------------------------------------------------------------------------------------------------------------------------------------------------------------------------------------------------------------------------------------------------------------------------------------------------------------------------------------------------------------------------------------------------------------------------------------------------------------------------------------------------------------------------------------------------------------------------------------------------------------------------------------------------------------------------|
| Travel time to nearest settlement >50,000 inhabitants | Static              | Malaria Atlas Project, Big Data Institute, Nuffield Department of Medicine, University of Oxford | Weiss, D. J. <i>et al.</i> A global map of travel time to cities to assess inequalities in accessibility in 2015. <i>Nature</i> <b>533</b> , 333–336 (2018).                                                                                                                                                                                                                                                                                                                                                                                                                                                                                                                                                                                                                                                                                                                                                                                                                                                                                |
| Urbanicity                                            | Annual (2000–2016)  | European Commission/ GHS                                                                         | Pesaresi, M. <i>et al.</i> Operating procedure for the production of the Global Human Settlement Layer from Landsat data of the epochs 1975, 1990, 2000, and 2014. (Publications Office of the European Union, 2016).                                                                                                                                                                                                                                                                                                                                                                                                                                                                                                                                                                                                                                                                                                                                                                                                                       |
| Elevation                                             | Static              | NOAA                                                                                             | Hastings, David A., and Paula K. Dunbar. Global Land One-kilometer Base Elevation (GLOBE) Digital Elevation Model, Documentation, Volume 1.0. Key to Geophysical Records Documentation (KGRD) 34. National Oceanic and Atmospheric Administration, National Geophysical Data Center, 325 Broadway, Boulder, Colorado 80303, U.S.A (1999)<br><br>GLOBE Task Team and others (Hastings, David A., Paula K. Dunbar, Gerald M. Elphinstone, Mark Bootz, Hiroshi Murakami, Hiroshi Maruyama, Hiroshi Masaharu, Peter Holland, John Payne, Nevin A. Bryant, Thomas L. Logan, J.-P. Muller, Gunter Schreier, and John S. MacDonald), eds., 1999. The Global Land One-kilometer Base Elevation (GLOBE) Digital Elevation Model, Version 1.0. National Oceanic and Atmospheric Administration, National Geophysical Data Center, 325 Broadway, Boulder, Colorado 80303, U.S.A. Available at: <a href="https://www.ngdc.noaa.gov/mgg/topo/globe.html">https://www.ngdc.noaa.gov/mgg/topo/globe.html</a> . (Accessed: 16 <sup>th</sup> February 2017). |
| Growing Season Length                                 | Static              | FAO (derived)                                                                                    | FAO. GAEZ - Global Agro-Ecological Zones data portal. Available at: <a href="http://www.fao.org/nr/gaez/about-data-portal/en/">http://www.fao.org/nr/gaez/about-data-portal/en/</a> . (Accessed: 3/20/2018).                                                                                                                                                                                                                                                                                                                                                                                                                                                                                                                                                                                                                                                                                                                                                                                                                                |

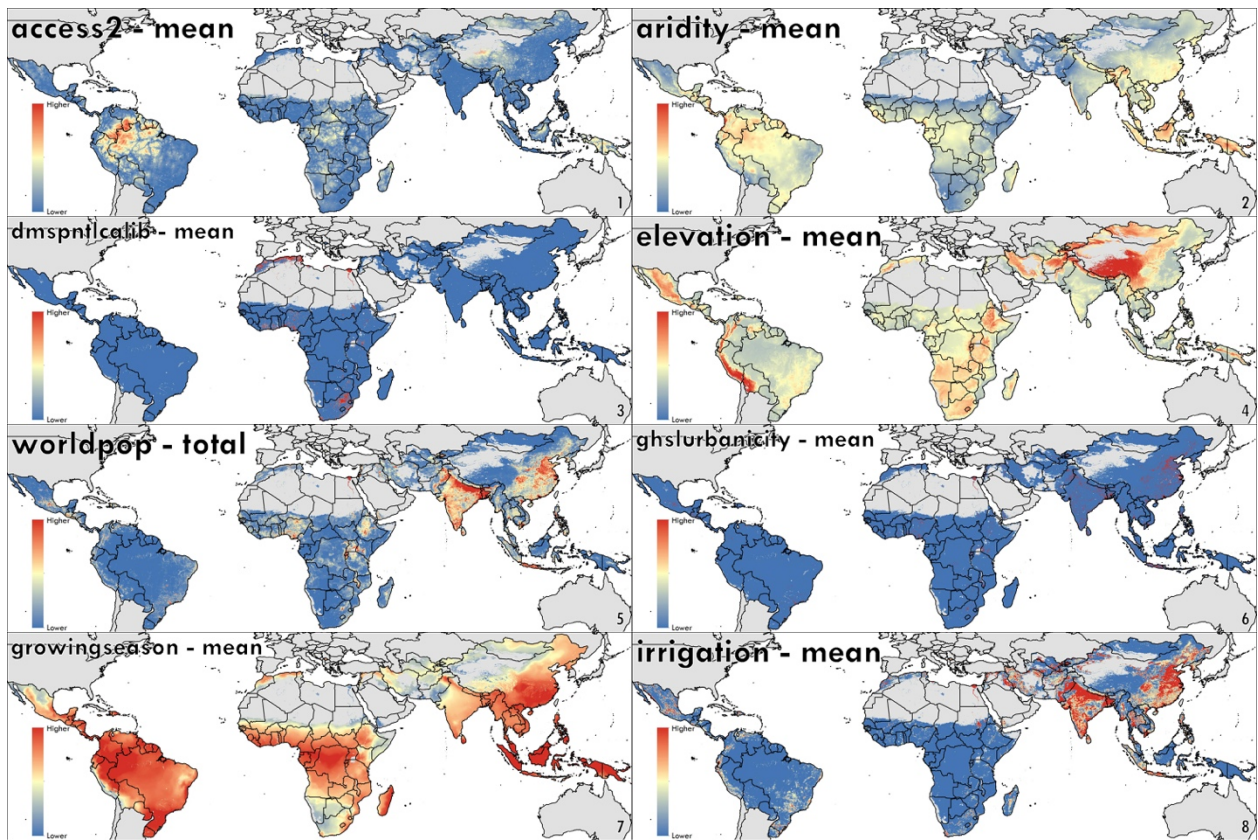

65 **Supplementary Figure 6. Covariates**

Eight covariate raster layers of possible socioeconomic and environmental correlates of educational attainment in LMICs were used as inputs for the stacking modelling process; **1** – travel time to nearest settlement; **2** – aridity; **3** – nighttime lights; **4** – elevation; **5** – population; **6** – urbanicity; **7** – growing season length; **8** – irrigation. Time-varying covariates are presented for the most recent available year.

70 The year of production of non-time-varying covariates is provided in the individual covariate citation in Supplementary Table 3.

## 5.0 Supplementary methods

### 5.1 Cluster combination and spatial integration over polygon records

Our individual-level data were collapsed (summarised) into clusters if they could be georeferenced to latitude-longitude pairs. Otherwise, we collapsed our individual-level data to the smallest polygon that could be referenced. We used survey weights and the survey package in R to account for non-equal sampling probabilities due to non-simple-random sampling<sup>29</sup>.

Data without latitude and longitude, but that could be geolocated to an administrative area, were resampled to generate candidate point locations based on the underlying population of the administrative area. The main concept is to leverage covariate values across the polygon when performing the regression, while simultaneously accounting for a population-driven survey design. The methods used for the resampling are consistent with those used in geospatial modelling of under-5 mortality, published previously.

For each polygon-level observation, 10,000 points were randomly sampled from within the polygon (regardless of the polygon's area) using the WorldPop total population raster<sup>30</sup> to weight the locations of the draws. K-means clustering was performed on the candidate points to generate integration points (1 per 1,000 pixels) used in the modelling. Weights were assigned to each integration point proportionally to the number of candidate points that entered into the k-means cluster, such that the weight of each point represented the number of population-sampled locations contained within the K-means cluster location, divided by the number of sampled points generated (10,000). Each point generated by this process was assigned the mean attainment or relevant proportion of schooling observed from the survey for that polygon. These sample weights were used directly in the likelihood evaluation during model fitting<sup>20</sup>.

### 5.2 Geostatistical model

#### 5.2.1 Model geographies

Models were run for each indicator in fourteen continuous geographic regions within all LMICs chosen to align with the regions used in the Global Burden of Disease (GBD) study, which determines regions based on epidemiological homogeneity, sociodemographic similarity and geographic contiguity (see Supplementary Fig. 1–5 for lists of regions and countries). Minor changes were made to the GBD regions to ensure spatial contiguity within regions (see Extended Data Fig. 1 for an illustration of the modelling regions). All data within the spatial region, and within a one-degree buffer from the boundaries of each region, were included in each model to minimise edge effects.



### 5.2.2 Ensemble covariate modelling

An ensemble covariate modelling method was implemented in order to both select covariates and capture possible non-linear effects and complex interactions between them<sup>31</sup>. For each region, three sub-models were fit to our dataset, using all of our covariate data as explanatory predictors: generalised additive models, boosted regression trees, and lasso regression using the `mgcv`, `glmnet`, `dismo`, and `caret` packages in R. Sample weights are used in sub-models, where applicable, such that cluster locations with latitude and longitude had a sample weight of 1, while cluster locations where the latitude and longitude was generated by the polygon resampling process had a weight based on the K-means clustering process (see section 5.1, Cluster combination and spatial integration over polygon records).

Each sub-model is fit using five-fold cross-validation to avoid overfitting. The out-of-sample predictions from across the five holdouts are compiled into a single comprehensive set of predictions from that model. Additionally, the same sub-models were also run using 100% of the data, and a full set of in-sample predictions were created. The five sets of out-of-sample sub-model predictions are fed into the full geostatistical model as the explanatory covariates when performing the model fit. The in-sample predictions from the sub-models are used as the covariates when generating predictions using the fitted full geostatistical model. A recent study has shown that this ensemble approach can improve predictive validity by up to 25% over an individual model<sup>31</sup>.

Predictions from each sub-model are generated based on patterns and relationships between the raw covariates and attainment data, while predictions from the full geostatistical model are generated based on patterns and relationships between the predictions from the ensemble of sub-models and attainment data. To discover the relationships between the sub-model prediction layers (used as covariates in the full geostatistical model) and the attainment data, the only values of the covariates (sub-model prediction layers) “seen” by the model are the values underlying the locations of surveys. As such, it is possible that estimates will be generated in areas where the values of the covariates exceed the minimum and maximum values observed by the model. In these areas, the estimates are generated by extrapolating from the patterns observed within the range of covariates underlying the survey and census data.

### 5.2.3 Model description

Gaussian and binomial data are modeled within a Bayesian hierarchical modelling framework using a spatially and temporally explicit hierarchical generalized linear regression model to fit mean years of education attainment and proportion of population achieving key bins of school in 14 regions across all LMICs as defined in the GBD study (see Extended Data Fig. 1)<sup>32</sup>. This means we fit 14 independent models for each indicator (i.e., the proportion of women with zero years of schooling). The GBD study design sought to create regions on the basis of three primary criteria: epidemiological homogeneity, sociodemographic similarity and geographic contiguity<sup>32</sup>. For each Gaussian indicator, we modelled the expected mean years of attainment in location  $i$  and time  $t$  using observed means in each cluster  $d$  as indicated by  $edu_d$ . Each cluster ( $d$ ) is located precisely in time ( $t$ ) and space ( $i$ ). We model the mean years of attainment as Gaussian data given fixed precision  $\tau$  and a scaling parameter  $s_i$  (defined by the sample size in the observed cluster mean).

$$edu_d | \mu_{i(d),t(d)}, s_d, \tau \sim \text{Normal}(\mu_{i(d),t(d)}, \tau * s_d)$$

$$\mu_{i,t} = \beta_0 + \mathbf{X}_{i,t}\boldsymbol{\beta} + Z_{i,t} + \epsilon_{ctr(i)} + \epsilon_{i,t}$$

For each binomial indicator, we modelled the expected probability of attaining that level of educational attainment in location  $i$  and time  $t$  using the observed number of women in cluster  $d$ , among an observed sample size  $N_d$ , who reported that level as indicated by binomial count data  $C_d$ .

$$C_d | p_{i(d),t(d)}, N_d \sim \text{Binomial}(p_{i(d),t(d)}, N_d)$$

$$\text{logit}(p_{i,t}) = \beta_0 + \mathbf{X}_{i,t}\boldsymbol{\beta} + Z_{i,t} + \epsilon_{ctr(i)} + \epsilon_{i,t}$$

We used a continuation-ratio modelling approach to account for the ordinal data structure of the binomial indicators<sup>33</sup>. To do this, the proportion of population with zero years of education was modelled using a binomial model. The proportion with less than primary education was modelled as those with less than primary education of those that have more than zero years of education. The same method followed for the proportion of population completing primary education. The proportion achieving secondary school or higher was estimated as the complement of sum of the three binomial models.

The remaining parameters were consistent between all indicators in both binomial and Gaussian models:

$$\sum_{h=1}^3 \beta_h = 1$$

$$\epsilon_{ctr} \sim \text{iid Normal}(0, \gamma^2)$$

$$\epsilon_{i,t} \sim \text{iid Normal}(0, \sigma^2)$$

$$\mathbf{Z} \sim \text{GP}(0, \Sigma^{\text{space}} \otimes \Sigma^{\text{time}})$$

$$\Sigma^{\text{space}} = \frac{\omega^2}{\Gamma(\nu)2^{\nu-1}} \times (\kappa D)^\nu \times K_\nu(\kappa D)$$

$$\Sigma_{j,k}^{\text{time}} = \rho^{|k-j|}$$

For indices  $d$ ,  $i$ , and  $t$ ,  $*$ (index) is the value of  $*$  at that index. The probabilities  $p_{i,t}$  represent both the annual proportions at the space-time location and the probability that an individual had that level of attainment given that they lived at that particular location. The annual probability  $p_{i,t}$  of each indicator (or  $\mu_{i,t}$  for the mean indicators) was modelled as a linear combination of the three sub-models (generalised additive model (GAM), boosted regression trees (BRT), and lasso regression), rasterized covariate values  $X_{i,t}$ , a correlated spatiotemporal error term  $Z_{i,t}$ , country random effects  $\epsilon_{ctr(i)}$  with one unstructured country random effect fit for each country in the modelling region and all sharing a common variance parameter,  $\gamma^2$ , and an independent nugget effect  $\epsilon_{i,t}$  with variance parameter  $\sigma^2$ . Coefficients  $\beta_h$  in the three sub-models  $h = 1, 2, 3$  represent their respective predictive weighting in the mean logit link, while the joint error term  $Z_{i,t}$  accounts for residual spatiotemporal autocorrelation between individual data points that remains after accounting for the predictive effect of the sub-model covariates, the country-level random effect  $\epsilon_{ctr(i)}$ , and the nugget independent error term,  $\epsilon_{i,t}$ . The purpose of the country-level random effect is to capture spatially unstructured, unobserved country-specific variables, as there are often sharp discontinuities in educational attainment between adjacent countries due to systematic differences in governance, infrastructure, and social policy.

The residuals  $Z_{i,t}$  are modelled as a three-dimensional Gaussian process (GP) in space-time centered at zero and with a covariance matrix constructed from a Kronecker product of spatial and temporal covariance kernels. The spatial covariance  $\Sigma^{\text{space}}$  is modelled using an isotropic and stationary Matérn function<sup>34</sup> and temporal covariance  $\Sigma^{\text{time}}$  as an annual autoregressive (AR1) function over the 18 years represented in the model. In the stationary Matérn function,  $\Gamma$  is the Gamma function,  $K_\nu$  is the modified Bessel function of order  $\nu > 0$ ,  $\kappa > 0$  is a scaling parameter,  $D$  denotes the Euclidean distance, and  $\omega^2$  is the marginal variance. The scaling parameter,  $\kappa$ , is defined to be  $\kappa = \sqrt{8\nu}/\delta$  where  $\delta$  is a range parameter (which is about the distance where the covariance function approaches 0.1) and  $\nu$  is a scaling constant, which is set to 2 rather than fit from the data<sup>35</sup>. This parameter is difficult to reliably fit, as documented by many other analyses that set this to  $2^{35-37}$ . The number of rows and the number of columns of the spatial Matérn covariance matrix are equal to the number of spatial mesh points for a given modeling region. In the AR1 function,  $\rho$  is the autocorrelation function (ACF), and  $k$  and  $j$  are points in the time series where  $|k - j|$  defines the lag. The number of rows and the number of columns of the AR1 covariance matrix are equal to the number of temporal mesh points<sup>37</sup>. The number of rows and the number of columns of the space-time covariance matrix  $\Sigma^{\text{space}} \otimes \Sigma^{\text{time}}$  for a given modeling region are both equal to: (the number of spatial mesh points  $\times$  the number of temporal mesh points).

This approach leveraged the data's residual correlation structure to more accurately predict estimates for locations with no data, while also propagating the dependence in the data through

to uncertainty estimates. The posterior distributions were fit using computationally efficient and accurate approximations in R-integrated nested Laplace approximation (INLA) with the stochastic partial differential equations (SPDE) approximation to the Gaussian process residuals using R project version 3.5.1. The SPDE approach using INLA has been demonstrated elsewhere, including the estimation of health indicators, particulate air matter, and population age structure<sup>20,21,38,39</sup>. Uncertainty intervals (UIs) were generated from 1,000 draws (i.e., statistically plausible candidate maps)<sup>40</sup> created from the posterior-estimated distributions of modelled parameters.

To transform grid cell-level estimates into a range of information useful to a wide constituency of potential users, these estimates were aggregated from the 1,000 candidate maps up to district, provincial, and national levels using  $5 \times 5$ -km<sup>2</sup> population data<sup>6</sup>. This aggregation also allowed for calibration of estimates to national GBD estimates for 2000–2017. This was achieved by calculating the ratio of the posterior mean national-level estimate from each candidate map draw in the analysis to the posterior mean national estimates from GBD, and then multiplying each cell in the posterior sample by this ratio. National level estimates from this analysis with GBD estimates can be found in Supplementary Table 44.

#### 5.2.4 Priors

The following priors were used for all sixteen of our education models:

- $\log\left(\frac{1+\rho}{1-\rho}\right) \sim Normal(\mu = 0, \sigma^2 = 1/0.15)$ ,
- $\theta_1 = \log(\tau) \sim Normal(\mu_{\theta_1}, \sigma_{\theta_1}^2)$
- $\theta_2 = \log(\kappa) \sim Normal(\mu_2, \sigma_{\theta_2}^2)$
- $\beta_0 \sim N(\mu = 0, \sigma^2 = 3^2)$ ,
- $\beta_h \sim N(\mu = 0, \sigma^2 = 3^2)$ ,
- $\left(\frac{1}{\sigma_{nugget}^2}\right) \sim gamma(\alpha = 1, \gamma = 2)$ .
- $\left(\frac{1}{\sigma_{country}^2}\right) \sim gamma(\alpha = 1, \gamma = 2)$ .

Given that our covariates used in INLA, i.e., the predicted outputs from the ensemble models, should be on the same scale as our predictive target, we believe that the intercept in our model should be close to zero and that the regression coefficients should sum to one. As such, we have chosen the prior for our intercept to be  $N(0, \sigma^2 = 3^2)$ , and the prior for the fixed effect coefficients to be  $N\left(\frac{1}{\# \text{ ensemble models}}, \sigma^2 = 3^2\right)$ . The prior on the temporal correlation parameter  $\rho$  is chosen to be mean 0.91, with a 95% range of  $\rho$  falling between 0.86 and 0.93. This high correlation prior is justified by a lack of large changes over short periods of time in education, suggesting high correlation of values over time. The priors on the random effects variances were chosen to be relatively loose given that we believe our fixed effects covariates should be well correlated with our outcome of interest, which might suggest relatively small random effects values. The priors used for the nugget and the country random effects are the default in INLA. We have run a series of sensitivity tests comparing our predictions between the default INLA gamma priors and the uniform prior. Due to close concordance in predictions (=0.97) and no meaningful difference identified in the fit statistics, we have decided to maintain the default

priors. At the same time, we wanted to avoid using a prior that was so diffuse as to actually put high prior weight on large random effect variances. For stability, we used the uncorrelated multivariate normal priors that INLA automatically determines (based on the finite elements mesh) for the log-transformed spatial hyperparameters  $\kappa$  and  $\tau$ . The mean and variance parameters for the hyperpriors selected by INLA for the meshes in each region can be found in Supplementary Table 4. In our parameterization we represent  $\alpha$  and  $\gamma$  in the *gamma* distribution as scale and shape, respectively.

After fitting each model, we generated 1,000 draws of all model parameters from the approximated joint posterior distribution using the `inla.posterior.sample()` function in R-INLA. For each binomial indicator draw  $s$  of the model parameters we constructed a draw of  $p_i$  as:

$$p_i^{(s)} = \text{logit}^{-1}\left(\beta_0^{(s)} + \beta_1^{(s)}\mathbf{X}_i + \epsilon_i^{\text{CTRY}(s)} + \epsilon_i^{\text{GP}(s)} + \epsilon_i^{\text{nug}(s)}\right)$$

The construction of draws for Gaussian indicators is similar:

$$p_i^{(s)} = \beta_0^{(s)} + \beta_1^{(s)}\mathbf{X}_i + \epsilon_i^{\text{CTRY}(s)} + \epsilon_i^{\text{GP}(s)} + \epsilon_i^{\text{nug}(s)}$$

Additional processing of the output from `inla.posterior.sample()` is required for the spatial-temporal random effect ( $\epsilon_i^{\text{GP}(s)}$ ) and the nugget effect ( $\epsilon_i^{\text{nug}(s)}$ ) prior to constructing  $p_i^{(s)}$  according to the equation above. Specifically, for  $\epsilon_i^{\text{GP}(s)}$ , draws are generated initially only at vertices of the finite element mesh, so we project from this mesh to each location-year combination of  $(i)$  desired for prediction, i.e., the centroid of each grid cell on a  $5 \times 5$ -km<sup>2</sup> grid as well as all years from 2000 to 2017. For the nugget effect, we generate  $\epsilon_i^{\text{nug}(s)}$  for each location-year combination of  $(i)$  by sampling from Normal  $\left(0, \sigma_{\text{nugget}}^2(s)\right)$ . At the end of this process, we have 1,000 draws of  $p_i$  for each grid cell and year combination.

**Supplementary Table 6. Spatial hyperparameter priors by region**

| Region                      | $\mu_{\theta_1}$ | $\sigma_{\theta_1}^2$ | $\mu_2$    | $\sigma_{\theta_2}^2$ |
|-----------------------------|------------------|-----------------------|------------|-----------------------|
| East Asia                   | 0.3779940        | 10                    | -1.6435062 | 10                    |
| Southeast Asia              | -0.3667678       | 10                    | -0.8987443 | 10                    |
| Oceania                     | 0.5420207        | 10                    | -1.8075328 | 10                    |
| South Asia                  | 0.2314676        | 10                    | -1.4969797 | 10                    |
| Tropical South America      | 0.1287355        | 10                    | -1.3942477 | 10                    |
| Andean South America        | 0.0516064        | 10                    | -1.3171185 | 10                    |
| Central America & Caribbean | 0.3250544        | 10                    | -1.5905666 | 10                    |
| North Africa                | 0.2997445        | 10                    | -1.5652567 | 10                    |
| West Sub-Saharan Africa     | 0.2006548        | 10                    | -1.4661669 | 10                    |
| Central Sub-Saharan Africa  | -0.2024953       | 10                    | -1.0630168 | 10                    |
| Eastern Sub-Saharan Africa  | 0.1372834        | 10                    | -1.4027955 | 10                    |
| Southern Sub-Saharan Africa | -0.1459584       | 10                    | -1.1195537 | 10                    |
| Middle East                 | -0.2211790       | 10                    | -1.0443331 | 10                    |

|                     |            |    |            |    |
|---------------------|------------|----|------------|----|
| <b>Central Asia</b> | -0.2064342 | 10 | -1.0590779 | 10 |
|---------------------|------------|----|------------|----|

### 5.2.5 Mesh construction

We constructed the finite elements mesh for the stochastic partial differential equation approximation to the Gaussian process regression using a simplified polygon boundary (in which coastlines and complex boundaries were smoothed) for each of the regions within our model<sup>20</sup>. This paper uses an improved mesh that is constructed on the S2 domain. This allows distance to be calculated along the sphere instead of using Euclidean distance between latitude and longitude coordinates. This mesh also generates denser vertices in data rich areas. We set the minimum triangle edge length to 25 kilometers, the maximum triangle length to 1000 kilometers, with the mesh extending 500 kilometers past the region's boundary. An example of finite elements mesh-constructed for East Asia mesh can be found in Supplementary Fig. 7.

### 5.2.6 Model fitting and estimate generation

Models were fit in INLA with methods consistent with those used in geospatial modelling of under-5 mortality, published previously<sup>21</sup>.

Resampling K-means weights (Supplementary Methods 5.2) were used within the INLA fit by multiplying the corresponding log-likelihood evaluation for the specific observation by the observation's K-means weight. Data points that could be georeferenced to latitude-longitude locations were assigned a weight of 1. For cluster locations generated based on the polygon resampling process, the log-likelihood of those points contributed proportionate to the K-means weights, effectively diffusing the evaluation of the observation across the polygon.

As part of the ensemble modelling process, prediction surfaces from the out-of-sample ensemble sub-models were used as covariates in the spatiotemporal model. Estimates of the fixed effects beta coefficients derived from the contribution of each of the sub-models to INLA's predicted prevalence estimates, in conjunction with parameter estimates of the contribution of location and time (based on estimated parameters described in model description in the Supplementary Methods 5.3.3), were generated and can be found in Supplementary Tables 5–7. To create final estimates, the in-sample prediction surfaces of prevalence from the sub-models (serving as covariates) were used to calculate estimates of prevalence for each pixel in each year.

All estimates were generated by taking 1,000 draws from the posterior distribution, which yielded 1,000 candidate maps used to summarise the pixel- and aggregated-level statistics. For estimates at the pixel level, these draws were used directly to generate estimates and uncertainty. Aggregated estimates, in which estimates at the pixel level were summarised to administrative boundaries, were generated by creating population-weighted averages for each administrative boundary, for each draw.

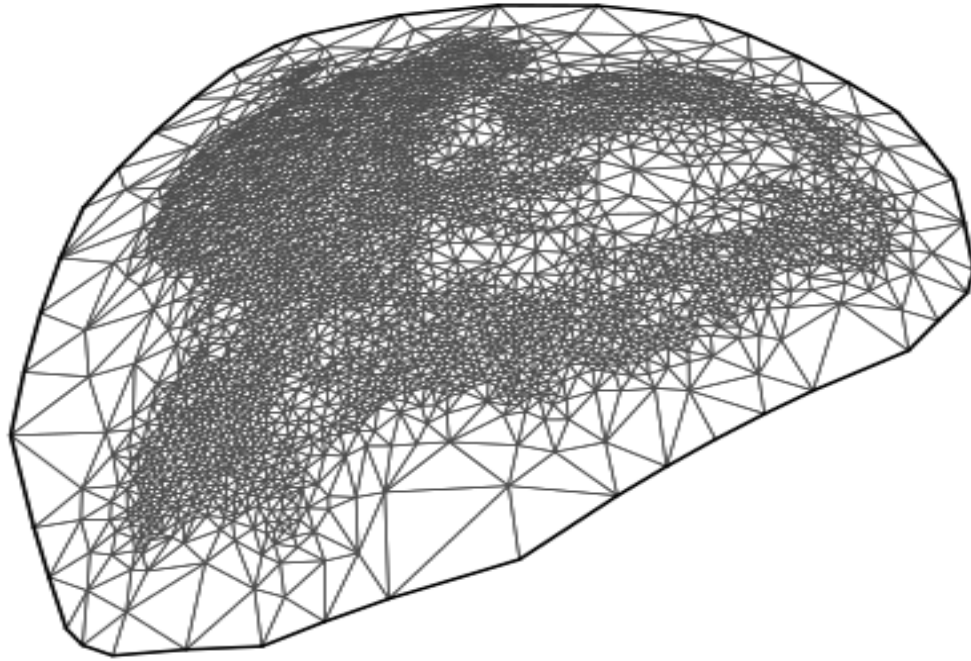

#### Supplementary Figure 7. Finite elements mesh

The finite elements mesh used to fit the space-time correlated error for the East Asia (EAAS) region. Both the fine-scale mesh over land in the modelling region and the coarser buffer region mesh are shown.

#### 5.2.7 Model Results

Fitted parameters and hyperparameters, as well as their 95% uncertainty intervals are shown by indicator and region in Supplementary Tables 8–23. Spatial hyperparameters ( $\tau$  and  $\kappa$ ) and their uncertainties have been transformed into more interpretable nominal variance and range parameters. Nominal variance, approximating the variance at any single point, is calculated as  $nom. var = 4\pi\kappa^2\tau^2$ , and nominal range, approximating the distance before spatial correlation decays by 90%, as  $range = \sqrt{8/\kappa}$ .<sup>†</sup>

**Supplementary Table 7. List of all modeled outcomes and the populations for which they are modelled**

| <b>Indicator</b>                                                                                                                                   | <b>Population</b> |
|----------------------------------------------------------------------------------------------------------------------------------------------------|-------------------|
| <b>Proportion of population with zero years of education</b>                                                                                       | Women, age 15–49  |
|                                                                                                                                                    | Men, age 15–49    |
|                                                                                                                                                    | Women, age 20–24  |
|                                                                                                                                                    | Men, age 20–24    |
| <b>Proportion of population with 1–5 years of education</b>                                                                                        | Women, age 15–49  |
|                                                                                                                                                    | Men, age 15–49    |
|                                                                                                                                                    | Women, age 20–24  |
|                                                                                                                                                    | Men, age 20–24    |
| <b>Proportion of population with 6–11 years of education</b>                                                                                       | Women, age 15–49  |
|                                                                                                                                                    | Men, age 15–49    |
|                                                                                                                                                    | Women, age 20–24  |
|                                                                                                                                                    | Men, age 20–24    |
| <b>Proportion of population with 12+ years of education</b><br><i>*This is indirectly estimated as the complement of the sum of indicators 1–3</i> | Women, age 15–49  |
|                                                                                                                                                    | Men, age 15–49    |
|                                                                                                                                                    | Women, age 20–24  |
|                                                                                                                                                    | Men, age 20–24    |
| <b>Mean years of educational attainment</b>                                                                                                        | Women, age 15–49  |
|                                                                                                                                                    | Men, age 15–49    |
|                                                                                                                                                    | Women, age 20–24  |
|                                                                                                                                                    | Men, age 20–24    |



**Supplementary Table 8. Proportion with zero years, women ages 15–49, fitted parameters**

Lower, median, and upper quantiles (0.025%, 0.50%, 0.975%) are displayed for the main parameters by region. The fixed effects covariates corresponding to the predicted ensemble rasters are shown in the first four columns, while fitted values for the spatiotemporal field hyperparameters and the precisions (inverse variance) for our random effects are shown in the last five columns.

|                             |       | int    | gam    | gbm    | lasso  | Nominal Range | Nominal Variance | AR1 rho | Precision for IID.ID | Precision for CTRY.ID |
|-----------------------------|-------|--------|--------|--------|--------|---------------|------------------|---------|----------------------|-----------------------|
| Central sub-Saharan Africa  | 0.025 | -1.749 | 2.151  | 1.163  | -3.645 | 0.050         | 1.156            | 0.945   | 8.090                | 1.677                 |
|                             | 0.5   | -1.359 | 2.502  | 1.675  | -3.177 | 0.056         | 1.404            | 0.961   | 8.964                | 3.873                 |
|                             | 0.975 | -0.970 | 2.853  | 2.186  | -2.710 | 0.063         | 1.848            | 0.982   | 10.924               | 8.058                 |
| Eastern sub-Saharan Africa  | 0.025 | -3.239 | -0.150 | 0.628  | -0.389 | 0.068         | 2.214            | 0.938   | 5.752                | 0.051                 |
|                             | 0.5   | -2.474 | 0.023  | 0.987  | -0.010 | 0.077         | 2.731            | 0.947   | 5.981                | 0.845                 |
|                             | 0.975 | -1.709 | 0.196  | 1.345  | 0.369  | 0.084         | 3.226            | 0.953   | 6.235                | 4.358                 |
| Northern Africa             | 0.025 | -1.330 | 0.218  | 1.512  | -1.433 | 0.046         | 0.785            | 0.932   | 5.222                | 1.202                 |
|                             | 0.5   | -0.948 | 0.440  | 1.733  | -1.173 | 0.049         | 0.882            | 0.939   | 5.333                | 5.245                 |
|                             | 0.975 | -0.566 | 0.661  | 1.953  | -0.912 | 0.053         | 1.007            | 0.949   | 5.472                | 15.918                |
| Southern sub-Saharan Africa | 0.025 | -3.125 | 0.208  | -0.550 | 0.441  | 0.099         | 1.637            | 0.942   | 20.048               | 0.504                 |
|                             | 0.5   | -2.238 | 0.524  | -0.265 | 0.741  | 0.112         | 2.115            | 0.952   | 21.237               | 2.103                 |
|                             | 0.975 | -1.351 | 0.840  | 0.019  | 1.041  | 0.128         | 2.725            | 0.960   | 22.256               | 5.162                 |
| Western sub-Saharan Africa  | 0.025 | -2.359 | 1.184  | -0.958 | -0.233 | 0.042         | 0.629            | 0.916   | 22.834               | 0.298                 |
|                             | 0.5   | -1.507 | 1.386  | -0.552 | 0.165  | 0.048         | 0.750            | 0.928   | 24.625               | 0.886                 |
|                             | 0.975 | -0.655 | 1.589  | -0.146 | 0.564  | 0.054         | 0.896            | 0.940   | 26.934               | 2.540                 |
| Middle East                 | 0.025 | -4.140 | 2.041  | 0.887  | -3.116 | 0.089         | 4.321            | 0.989   | 5.141                | 4.113                 |
|                             | 0.5   | -2.901 | 2.378  | 1.332  | -2.709 | 0.107         | 6.305            | 0.993   | 5.316                | 5.874                 |
|                             | 0.975 | -1.663 | 2.715  | 1.776  | -2.304 | 0.130         | 9.127            | 0.994   | 5.515                | 9.663                 |
| Central Asia                | 0.025 | -2.669 | 2.121  | -1.060 | -1.524 | 0.053         | 1.176            | 0.876   | 1.846                | 0.399                 |
|                             | 0.5   | -1.976 | 2.621  | -0.635 | -0.985 | 0.058         | 1.393            | 0.899   | 1.913                | 1.133                 |
|                             | 0.975 | -1.284 | 3.120  | -0.211 | -0.445 | 0.066         | 1.738            | 0.922   | 1.983                | 2.734                 |
| South Asia                  | 0.025 | -1.527 | 0.692  | 0.425  | -0.634 | 0.081         | 2.889            | 0.958   | 4.770                | 1.233                 |
|                             | 0.5   | -0.893 | 0.816  | 0.636  | -0.451 | 0.087         | 3.340            | 0.963   | 4.912                | 2.252                 |
|                             | 0.975 | -0.260 | 0.939  | 0.847  | -0.269 | 0.096         | 3.976            | 0.968   | 5.073                | 4.772                 |
| East Asia                   | 0.025 | -2.312 | 1.725  | 1.683  | -3.406 | 0.154         | 3.418            | 0.982   | 4.153                | 0.300                 |
|                             | 0.5   | -0.770 | 2.031  | 2.024  | -3.054 | 0.197         | 5.479            | 0.987   | 4.322                | 0.713                 |
|                             | 0.975 | 0.771  | 2.337  | 2.364  | -2.703 | 0.264         | 9.683            | 0.992   | 4.456                | 1.741                 |
| Southeast Asia              | 0.025 | -2.312 | 1.725  | 1.683  | -3.406 | 0.154         | 3.418            | 0.982   | 4.153                | 0.300                 |
|                             | 0.5   | -0.770 | 2.031  | 2.024  | -3.054 | 0.197         | 5.479            | 0.987   | 4.322                | 0.713                 |
|                             | 0.975 | 0.771  | 2.337  | 2.364  | -2.703 | 0.264         | 9.683            | 0.992   | 4.456                | 1.741                 |
| Oceania                     | 0.025 | -2.312 | 1.725  | 1.683  | -3.406 | 0.154         | 3.418            | 0.982   | 4.153                | 0.300                 |
|                             | 0.5   | -0.770 | 2.031  | 2.024  | -3.054 | 0.197         | 5.479            | 0.987   | 4.322                | 0.713                 |
|                             | 0.975 | 0.771  | 2.337  | 2.364  | -2.703 | 0.264         | 9.683            | 0.992   | 4.456                | 1.741                 |
|                             | 0.025 | -2.312 | 1.725  | 1.683  | -3.406 | 0.154         | 3.418            | 0.982   | 4.153                | 0.300                 |
|                             | 0.5   | -0.770 | 2.031  | 2.024  | -3.054 | 0.197         | 5.479            | 0.987   | 4.322                | 0.713                 |

|                                         |       | int    | gam   | gbm    | lasso  | Nominal Range | Nominal Variance | AR1 rho | Precision for IID.ID | Precision for CTRY.ID |
|-----------------------------------------|-------|--------|-------|--------|--------|---------------|------------------|---------|----------------------|-----------------------|
| Andean South America quantiles          | 0.975 | 0.771  | 2.337 | 2.364  | -2.703 | 0.264         | 9.683            | 0.992   | 4.456                | 1.741                 |
| Tropical South America quantiles        | 0.025 | -3.606 | 0.117 | -0.083 | 0.198  | 0.067         | 0.594            | 0.887   | 1.630                | 0.077                 |
|                                         | 0.5   | -2.129 | 0.330 | 0.185  | 0.485  | 0.087         | 0.906            | 0.926   | 1.742                | 0.241                 |
|                                         | 0.975 | -0.654 | 0.543 | 0.453  | 0.771  | 0.105         | 1.272            | 0.948   | 1.825                | 0.639                 |
| Central America and Caribbean quantiles | 0.025 | -3.765 | 3.671 | 2.935  | -7.868 | 0.070         | 1.140            | 0.906   | 13.623               | 0.367                 |
|                                         | 0.5   | -3.097 | 4.163 | 3.819  | -6.981 | 0.076         | 1.300            | 0.916   | 14.932               | 0.989                 |
|                                         | 0.975 | -2.431 | 4.653 | 4.702  | -6.095 | 0.085         | 1.553            | 0.929   | 15.874               | 2.547                 |

### Supplementary Table 9. Proportion with 1–5 years, women ages 15–49 fitted parameters

Lower, median, and upper quantiles (0.025%, 0.50%, 0.975%) are displayed for the main parameters by region. The fixed effects covariates corresponding to the predicted ensemble rasters are shown in the first four columns, while fitted values for the spatiotemporal field hyperparameters and the precisions (inverse variance) for our random effects are shown in the last five columns.

|                                       |       | int    | gam    | gbm    | lasso  | Nominal Range | Nominal Variance | AR1 rho | Precision for IID.ID | Precision for CTRY.ID |
|---------------------------------------|-------|--------|--------|--------|--------|---------------|------------------|---------|----------------------|-----------------------|
| Central sub-Saharan Africa quantiles  | 0.025 | -1.048 | 1.461  | 1.667  | -3.276 | 0.045         | 0.683            | 0.918   | 5.271                | 0.660                 |
|                                       | 0.5   | -0.619 | 1.782  | 2.090  | -2.873 | 0.053         | 0.849            | 0.936   | 5.688                | 1.564                 |
|                                       | 0.975 | -0.191 | 2.103  | 2.514  | -2.470 | 0.062         | 1.073            | 0.951   | 6.044                | 3.069                 |
| Eastern sub-Saharan Africa quantiles  | 0.025 | -2.920 | 1.410  | 2.415  | -4.713 | 0.131         | 3.562            | 0.981   | 11.000               | 1.782                 |
|                                       | 0.5   | -1.817 | 1.802  | 3.202  | -4.004 | 0.151         | 4.681            | 0.985   | 11.471               | 6.097                 |
|                                       | 0.975 | -0.716 | 2.194  | 3.988  | -3.296 | 0.180         | 6.516            | 0.988   | 12.052               | 25.315                |
| Northern Africa quantiles             | 0.025 | -1.839 | 0.387  | 1.396  | -1.782 | 0.057         | 0.589            | 0.886   | 9.186                | 1.461                 |
|                                       | 0.5   | -1.385 | 0.602  | 1.780  | -1.381 | 0.063         | 0.702            | 0.904   | 9.554                | 4.151                 |
|                                       | 0.975 | -0.931 | 0.816  | 2.163  | -0.981 | 0.071         | 0.870            | 0.925   | 9.964                | 14.198                |
| Southern sub-Saharan Africa quantiles | 0.025 | -2.575 | -0.004 | -1.964 | 1.447  | 0.094         | 0.977            | 0.969   | 34.790               | 0.584                 |
|                                       | 0.5   | -1.739 | 0.528  | -1.485 | 1.957  | 0.110         | 1.307            | 0.976   | 37.092               | 1.538                 |
|                                       | 0.975 | -0.903 | 1.059  | -1.006 | 2.467  | 0.127         | 1.783            | 0.982   | 39.145               | 3.520                 |
| Western sub-Saharan Africa quantiles  | 0.025 | -2.145 | 0.715  | -0.022 | -0.998 | 0.066         | 0.747            | 0.920   | 30.750               | 2.941                 |
|                                       | 0.5   | -1.643 | 1.075  | 0.446  | -0.521 | 0.078         | 1.010            | 0.935   | 33.503               | 22.946                |
|                                       | 0.975 | -1.142 | 1.436  | 0.914  | -0.044 | 0.091         | 1.359            | 0.948   | 36.685               | 174.247               |
|                                       | 0.025 | -2.684 | 2.169  | 0.038  | -2.159 | 0.114         | 3.840            | 0.990   | 6.301                | 0.713                 |

|                                         |       | int    | gam    | gbm    | lasso  | Nominal Range | Nominal Variance | AR1 rho | Precision for IID.ID | Precision for CTRY.ID |
|-----------------------------------------|-------|--------|--------|--------|--------|---------------|------------------|---------|----------------------|-----------------------|
| Middle East quantiles                   | 0.5   | -1.351 | 2.477  | 0.388  | -1.865 | 0.133         | 5.269            | 0.992   | 6.512                | 2.067                 |
|                                         | 0.975 | -0.019 | 2.785  | 0.737  | -1.571 | 0.155         | 7.105            | 0.994   | 6.704                | 4.907                 |
| Central Asia quantiles                  | 0.025 | -1.859 | 1.960  | 0.022  | -1.758 | 0.047         | 0.617            | 0.903   | 7.421                | 0.420                 |
|                                         | 0.5   | -1.213 | 2.217  | 0.268  | -1.486 | 0.054         | 0.792            | 0.923   | 7.933                | 1.139                 |
|                                         | 0.975 | -0.568 | 2.474  | 0.514  | -1.213 | 0.065         | 1.076            | 0.943   | 8.372                | 2.632                 |
| South Asia quantiles                    | 0.025 | -1.859 | 1.960  | 0.022  | -1.758 | 0.047         | 0.617            | 0.903   | 7.421                | 0.420                 |
|                                         | 0.5   | -1.213 | 2.217  | 0.268  | -1.486 | 0.054         | 0.792            | 0.923   | 7.933                | 1.139                 |
|                                         | 0.975 | -0.568 | 2.474  | 0.514  | -1.213 | 0.065         | 1.076            | 0.943   | 8.372                | 2.632                 |
| East Asia quantiles                     | 0.025 | -1.676 | 0.176  | 0.438  | -0.874 | 0.053         | 0.217            | 0.804   | 11.553               | 0.406                 |
|                                         | 0.5   | -1.149 | 0.545  | 0.894  | -0.439 | 0.066         | 0.272            | 0.887   | 12.633               | 0.946                 |
|                                         | 0.975 | -0.623 | 0.914  | 1.350  | -0.004 | 0.077         | 0.335            | 0.918   | 14.654               | 1.919                 |
| Southeast Asia quantiles                | 0.025 | -1.273 | 1.563  | 1.678  | -3.085 | 0.089         | 0.866            | 0.899   | 9.902                | 1.268                 |
|                                         | 0.5   | -0.841 | 1.781  | 1.996  | -2.777 | 0.102         | 1.118            | 0.918   | 10.394               | 2.431                 |
|                                         | 0.975 | -0.409 | 1.998  | 2.316  | -2.470 | 0.118         | 1.523            | 0.937   | 11.042               | 4.292                 |
| Oceania quantiles                       | 0.025 | -1.273 | 1.563  | 1.678  | -3.085 | 0.089         | 0.866            | 0.899   | 9.902                | 1.268                 |
|                                         | 0.5   | -0.841 | 1.781  | 1.996  | -2.777 | 0.102         | 1.118            | 0.918   | 10.394               | 2.431                 |
|                                         | 0.975 | -0.409 | 1.998  | 2.316  | -2.470 | 0.118         | 1.523            | 0.937   | 11.042               | 4.292                 |
| Andean South America quantiles          | 0.025 | -2.303 | -4.980 | -0.127 | 0.948  | 0.161         | 1.921            | 0.669   | 87.974               | 0.576                 |
|                                         | 0.5   | -1.529 | -2.589 | 0.313  | 3.277  | 0.186         | 2.537            | 0.753   | 93.858               | 1.612                 |
|                                         | 0.975 | -0.755 | -0.200 | 0.750  | 5.604  | 0.209         | 3.238            | 0.815   | 99.985               | 4.113                 |
| Tropical South America quantiles        | 0.025 | -3.492 | 1.272  | -0.226 | -1.314 | 0.127         | 0.857            | 0.853   | 5.103                | 0.234                 |
|                                         | 0.5   | -2.319 | 1.691  | 0.151  | -0.841 | 0.174         | 1.540            | 0.916   | 5.458                | 0.931                 |
|                                         | 0.975 | -1.146 | 2.111  | 0.524  | -0.369 | 0.241         | 2.830            | 0.952   | 5.814                | 2.839                 |
| Central America and Caribbean quantiles | 0.025 | -2.155 | 1.255  | 0.589  | -1.606 | 0.058         | 0.651            | 0.915   | 16.379               | 0.623                 |
|                                         | 0.5   | -1.783 | 1.413  | 0.903  | -1.317 | 0.066         | 0.806            | 0.930   | 17.343               | 3.216                 |
|                                         | 0.975 | -1.411 | 1.572  | 1.217  | -1.028 | 0.073         | 0.960            | 0.940   | 18.196               | 9.507                 |

**Supplementary Table 10. Proportion with 6–11 years, women ages 15–49 fitted parameters**

Lower, median, and upper quantiles (0.025%, 0.50%, 0.975%) are displayed for the main parameters by region. The fixed effects covariates corresponding to the predicted ensemble rasters are shown in the first four columns, while fitted values for the spatiotemporal field hyperparameters and the precisions (inverse variance) for our random effects are shown in the last five columns.

|                             |       | int    | gam    | gbm    | lasso   | Nominal Range | Nominal Variance | AR1 rho | Precision for IID.ID | Precision for CTRY.ID |
|-----------------------------|-------|--------|--------|--------|---------|---------------|------------------|---------|----------------------|-----------------------|
| Central sub-Saharan Africa  | 0.025 | 1.229  | 4.391  | 4.636  | -10.613 | 0.037         | 0.281            | 0.925   | 2.852                | 2.184                 |
|                             | 0.5   | 1.507  | 5.193  | 5.527  | -9.720  | 0.046         | 0.352            | 0.950   | 3.056                | 4.491                 |
|                             | 0.975 | 1.785  | 5.995  | 6.417  | -8.828  | 0.059         | 0.455            | 0.974   | 3.271                | 10.561                |
| Eastern sub-Saharan Africa  | 0.025 | -0.590 | -2.100 | 1.419  | 0.925   | 0.104         | 1.475            | 0.968   | 12.431               | 0.139                 |
|                             | 0.5   | 0.693  | -1.897 | 1.674  | 1.223   | 0.128         | 2.124            | 0.977   | 12.999               | 0.471                 |
|                             | 0.975 | 1.975  | -1.694 | 1.929  | 1.522   | 0.153         | 2.964            | 0.983   | 13.512               | 1.434                 |
| Northern Africa             | 0.025 | 0.342  | 2.102  | 2.241  | -4.206  | 0.039         | 0.283            | 0.741   | 6.140                | 1.667                 |
|                             | 0.5   | 0.612  | 2.329  | 2.554  | -3.883  | 0.044         | 0.340            | 0.813   | 6.340                | 8.005                 |
|                             | 0.975 | 0.882  | 2.556  | 2.866  | -3.561  | 0.048         | 0.391            | 0.847   | 6.503                | 24.527                |
| Southern sub-Saharan Africa | 0.025 | 0.345  | -0.665 | -0.171 | 1.090   | 0.083         | 0.602            | 0.967   | 44.009               | 0.716                 |
|                             | 0.5   | 1.103  | -0.445 | 0.064  | 1.381   | 0.104         | 0.970            | 0.981   | 46.242               | 1.976                 |
|                             | 0.975 | 1.860  | -0.226 | 0.299  | 1.673   | 0.122         | 1.343            | 0.986   | 48.770               | 4.471                 |
| Western sub-Saharan Africa  | 0.025 | -0.206 | 0.529  | 0.673  | -1.274  | 0.041         | 0.209            | 0.902   | 39.380               | 5.646                 |
|                             | 0.5   | 0.034  | 0.812  | 1.064  | -0.876  | 0.047         | 0.259            | 0.920   | 43.680               | 29.229                |
|                             | 0.975 | 0.274  | 1.095  | 1.455  | -0.480  | 0.054         | 0.323            | 0.936   | 48.713               | 150.100               |
| Middle East                 | 0.025 | -1.432 | 1.214  | 0.637  | -1.807  | 0.139         | 6.502            | 0.994   | 6.484                | 0.946                 |
|                             | 0.5   | 0.480  | 1.520  | 0.965  | -1.485  | 0.164         | 9.069            | 0.996   | 6.651                | 2.323                 |
|                             | 0.975 | 2.390  | 1.826  | 1.292  | -1.163  | 0.195         | 13.155           | 0.997   | 6.785                | 5.765                 |
| Central Asia                | 0.025 | 0.216  | -4.613 | 2.008  | 2.114   | 0.066         | 0.452            | 0.811   | 13.550               | 1.538                 |
|                             | 0.5   | 0.664  | -4.084 | 2.287  | 2.797   | 0.082         | 0.663            | 0.864   | 14.473               | 3.993                 |
|                             | 0.975 | 1.111  | -3.556 | 2.567  | 3.480   | 0.104         | 1.000            | 0.904   | 15.384               | 9.810                 |
| South Asia                  | 0.025 | 1.036  | 3.866  | 0.074  | -3.897  | 0.056         | 1.110            | 0.963   | 4.511                | 1.683                 |
|                             | 0.5   | 1.449  | 4.180  | 0.377  | -3.556  | 0.065         | 1.470            | 0.972   | 4.674                | 2.550                 |
|                             | 0.975 | 1.861  | 4.493  | 0.680  | -3.216  | 0.079         | 2.004            | 0.979   | 4.801                | 4.113                 |
| East Asia                   | 0.025 | -0.536 | 1.172  | 1.004  | -2.412  | 0.177         | 1.157            | 0.965   | 7.836                | 1363.578              |
|                             | 0.5   | 0.380  | 1.598  | 1.378  | -1.976  | 0.248         | 2.138            | 0.980   | 8.522                | 12361.429             |
|                             | 0.975 | 1.300  | 2.020  | 1.750  | -1.540  | 0.424         | 5.790            | 0.993   | 9.200                | 111000.000            |
| Southeast Asia              | 0.025 | 0.666  | 2.891  | 3.478  | -6.574  | 0.086         | 0.478            | 0.832   | 8.613                | 1.745                 |
|                             | 0.5   | 0.963  | 3.307  | 3.885  | -6.192  | 0.102         | 0.619            | 0.868   | 9.051                | 4.596                 |
|                             | 0.975 | 1.261  | 3.722  | 4.292  | -5.811  | 0.123         | 0.847            | 0.902   | 9.600                | 8.991                 |
| Oceania                     | 0.025 | 0.666  | 2.891  | 3.478  | -6.574  | 0.086         | 0.478            | 0.832   | 8.613                | 1.745                 |
|                             | 0.5   | 0.963  | 3.307  | 3.885  | -6.192  | 0.102         | 0.619            | 0.868   | 9.051                | 4.596                 |
|                             | 0.975 | 1.261  | 3.722  | 4.292  | -5.811  | 0.123         | 0.847            | 0.902   | 9.600                | 8.991                 |
| Andean South America        | 0.025 | 0.152  | 2.630  | 1.039  | -5.683  | 0.069         | 0.411            | -0.304  | 73.312               | 1.250                 |
|                             | 0.5   | 0.498  | 3.505  | 1.843  | -4.348  | 0.075         | 0.476            | 0.216   | 77.804               | 3.561                 |
|                             | 0.975 | 0.845  | 4.380  | 2.647  | -3.016  | 0.080         | 0.528            | 0.471   | 84.941               | 8.403                 |

|                                         |       | int    | gam   | gbm    | lasso  | Nominal Range | Nominal Variance | AR1 rho | Precision for IID.ID | Precision for CTRY.ID |
|-----------------------------------------|-------|--------|-------|--------|--------|---------------|------------------|---------|----------------------|-----------------------|
| Tropical South America quantiles        | 0.025 | 0.072  | 0.424 | 1.473  | -2.543 | 0.054         | 0.353            | 0.909   | 6.640                | 4.856                 |
|                                         | 0.5   | 0.483  | 0.870 | 2.019  | -1.889 | 0.074         | 0.583            | 0.945   | 7.498                | 9.511                 |
|                                         | 0.975 | 0.895  | 1.315 | 2.565  | -1.236 | 0.108         | 1.039            | 0.970   | 8.119                | 18.778                |
| Central America and Caribbean quantiles | 0.025 | -0.597 | 1.662 | -0.308 | -1.365 | 0.154         | 2.053            | 0.969   | 12.293               | 0.701                 |
|                                         | 0.5   | 0.435  | 1.943 | 0.080  | -1.023 | 0.179         | 2.787            | 0.976   | 13.003               | 1.859                 |
|                                         | 0.975 | 1.467  | 2.224 | 0.468  | -0.682 | 0.210         | 3.951            | 0.983   | 14.371               | 4.361                 |

**Supplementary Table 11. Proportion with zero years, men ages 15–49 fitted parameters**

Lower, median, and upper quantiles (0.025%, 0.50%, 0.975%) are displayed for the main parameters by region. The fixed effects covariates corresponding to the predicted ensemble rasters are shown in the first four columns, while fitted values for the spatiotemporal field hyperparameters and the precisions (inverse variance) for our random effects are shown in the last five columns.

|                                       |       | int    | gam    | gbm    | lasso  | Nominal Range | Nominal Variance | AR1 rho | Precision for IID.ID | Precision for CTRY.ID |
|---------------------------------------|-------|--------|--------|--------|--------|---------------|------------------|---------|----------------------|-----------------------|
| Central sub-Saharan Africa quantiles  | 0.025 | -2.588 | 2.598  | 1.866  | -5.588 | 0.067         | 1.349            | 0.959   | 13.215               | 1.844                 |
|                                       | 0.5   | -2.044 | 3.167  | 2.649  | -4.815 | 0.080         | 1.817            | 0.970   | 14.446               | 4.099                 |
|                                       | 0.975 | -1.502 | 3.735  | 3.430  | -4.043 | 0.094         | 2.515            | 0.979   | 16.185               | 8.920                 |
| Eastern sub-Saharan Africa quantiles  | 0.025 | -3.484 | -0.235 | 1.395  | -1.346 | 0.050         | 1.291            | 0.925   | 5.911                | 0.747                 |
|                                       | 0.5   | -2.853 | -0.006 | 1.867  | -0.861 | 0.058         | 1.680            | 0.943   | 6.224                | 2.531                 |
|                                       | 0.975 | -2.223 | 0.223  | 2.338  | -0.377 | 0.065         | 2.041            | 0.953   | 6.796                | 9.800                 |
| Northern Africa quantiles             | 0.025 | -2.165 | 0.272  | 0.971  | -1.268 | 0.049         | 0.650            | 0.904   | 5.895                | 1.242                 |
|                                       | 0.5   | -1.701 | 0.522  | 1.349  | -0.870 | 0.053         | 0.737            | 0.914   | 6.091                | 3.464                 |
|                                       | 0.975 | -1.239 | 0.770  | 1.726  | -0.472 | 0.056         | 0.815            | 0.922   | 6.235                | 9.762                 |
| Southern sub-Saharan Africa quantiles | 0.025 | -3.050 | -0.144 | -0.813 | 0.890  | 0.102         | 1.727            | 0.946   | 21.804               | 0.660                 |
|                                       | 0.5   | -2.108 | 0.240  | -0.474 | 1.234  | 0.116         | 2.237            | 0.956   | 23.067               | 2.225                 |
|                                       | 0.975 | -1.166 | 0.624  | -0.135 | 1.577  | 0.134         | 2.978            | 0.964   | 24.347               | 5.520                 |
| Western sub-Saharan Africa quantiles  | 0.025 | -3.242 | 1.599  | -1.014 | -1.784 | 0.038         | 0.398            | 0.904   | 27.657               | 0.222                 |
|                                       | 0.5   | -2.320 | 2.072  | -0.143 | -0.928 | 0.042         | 0.476            | 0.919   | 31.013               | 0.662                 |
|                                       | 0.975 | -1.398 | 2.544  | 0.728  | -0.074 | 0.047         | 0.576            | 0.935   | 34.542               | 1.803                 |
| Middle East quantiles                 | 0.025 | -5.123 | 1.462  | 2.295  | -4.310 | 0.140         | 9.462            | 0.997   | 6.464                | 2.451                 |
|                                       | 0.5   | -2.665 | 1.893  | 2.875  | -3.767 | 0.176         | 14.899           | 0.998   | 6.649                | 4.655                 |
|                                       | 0.975 | -0.209 | 2.323  | 3.455  | -3.226 | 0.224         | 24.514           | 0.998   | 6.890                | 7.040                 |
|                                       | 0.025 | -3.362 | 1.182  | -0.907 | -1.044 | 0.079         | 1.401            | 0.885   | 2.117                | 0.503                 |

|                                         |       | int    | gam    | gbm    | lasso  | Nominal Range | Nominal Variance | AR1 rho | Precision for IID.ID | Precision for CTRY.ID |
|-----------------------------------------|-------|--------|--------|--------|--------|---------------|------------------|---------|----------------------|-----------------------|
| Central Asia quantiles                  | 0.5   | -2.515 | 1.791  | -0.365 | -0.424 | 0.095         | 1.864            | 0.911   | 2.196                | 1.375                 |
|                                         | 0.975 | -1.669 | 2.399  | 0.176  | 0.195  | 0.110         | 2.447            | 0.933   | 2.262                | 3.529                 |
| South Asia quantiles                    | 0.025 | -2.431 | 0.673  | 0.242  | -0.556 | 0.106         | 3.839            | 0.963   | 4.922                | 1.026                 |
|                                         | 0.5   | -1.470 | 0.839  | 0.494  | -0.333 | 0.120         | 4.777            | 0.969   | 5.054                | 1.974                 |
|                                         | 0.975 | -0.510 | 1.005  | 0.746  | -0.110 | 0.131         | 5.670            | 0.972   | 5.221                | 4.479                 |
| East Asia quantiles                     | 0.025 | -3.081 | 2.131  | 0.778  | -3.371 | 0.161         | 2.842            | 0.979   | 5.410                | 0.580                 |
|                                         | 0.5   | -1.516 | 2.611  | 1.226  | -2.837 | 0.213         | 5.024            | 0.988   | 5.771                | 1.111                 |
|                                         | 0.975 | 0.048  | 3.090  | 1.673  | -2.303 | 0.292         | 9.200            | 0.993   | 6.063                | 2.370                 |
| Southeast Asia quantiles                | 0.025 | -1.407 | 1.901  | 0.553  | -2.206 | 0.074         | 1.315            | 0.886   | 2.165                | 1.760                 |
|                                         | 0.5   | -0.959 | 2.091  | 0.839  | -1.930 | 0.083         | 1.534            | 0.909   | 2.204                | 2.271                 |
|                                         | 0.975 | -0.511 | 2.280  | 1.124  | -1.654 | 0.090         | 1.771            | 0.922   | 2.261                | 3.037                 |
| Oceania quantiles                       | 0.025 | -1.407 | 1.901  | 0.553  | -2.206 | 0.074         | 1.315            | 0.886   | 2.165                | 1.760                 |
|                                         | 0.5   | -0.959 | 2.091  | 0.839  | -1.930 | 0.083         | 1.534            | 0.909   | 2.204                | 2.271                 |
|                                         | 0.975 | -0.511 | 2.280  | 1.124  | -1.654 | 0.090         | 1.771            | 0.922   | 2.261                | 3.037                 |
| Andean South America quantiles          | 0.025 | -3.880 | -1.577 | -0.323 | -0.629 | 0.136         | 1.756            | 0.789   | 109.194              | 0.238                 |
|                                         | 0.5   | -2.995 | -0.105 | 0.250  | 0.856  | 0.152         | 2.177            | 0.827   | 115.886              | 0.641                 |
|                                         | 0.975 | -2.111 | 1.366  | 0.822  | 2.339  | 0.174         | 2.719            | 0.856   | 125.628              | 1.653                 |
| Tropical South America quantiles        | 0.025 | -3.737 | 0.151  | -0.236 | -0.011 | 0.041         | 0.356            | 0.847   | 5.191                | 0.093                 |
|                                         | 0.5   | -2.497 | 0.450  | 0.159  | 0.392  | 0.049         | 0.455            | 0.894   | 5.420                | 0.300                 |
|                                         | 0.975 | -1.258 | 0.749  | 0.553  | 0.794  | 0.061         | 0.566            | 0.922   | 5.687                | 0.722                 |
| Central America and Caribbean quantiles | 0.025 | -4.045 | 2.190  | 2.961  | -7.429 | 0.076         | 0.960            | 0.922   | 14.841               | 0.474                 |
|                                         | 0.5   | -3.431 | 2.692  | 4.373  | -6.065 | 0.089         | 1.251            | 0.942   | 15.858               | 1.292                 |
|                                         | 0.975 | -2.818 | 3.194  | 5.783  | -4.702 | 0.109         | 1.801            | 0.963   | 16.878               | 3.089                 |

**Supplementary Table 12. Proportion with 1–5 years, men ages 15–49 fitted parameters**

Lower, median, and upper quantiles (0.025%, 0.50%, 0.975%) are displayed for the main parameters by region. The fixed effects covariates corresponding to the predicted ensemble rasters are shown in the first four columns, while fitted values for the spatiotemporal field hyperparameters and the precisions (inverse variance) for our random effects are shown in the last five columns.

|                                      |       | int    | gam   | gbm   | lasso  | Nominal Range | Nominal Variance | AR1 rho | Precision for IID.ID | Precision for CTRY.ID |
|--------------------------------------|-------|--------|-------|-------|--------|---------------|------------------|---------|----------------------|-----------------------|
| Central sub-Saharan Africa quantiles | 0.025 | -1.489 | 1.683 | 1.277 | -3.132 | 0.053         | 0.811            | 0.932   | 8.416                | 1.072                 |
|                                      | 0.5   | -1.074 | 2.000 | 1.694 | -2.694 | 0.063         | 1.093            | 0.954   | 9.500                | 2.421                 |
|                                      | 0.975 | -0.659 | 2.317 | 2.111 | -2.257 | 0.079         | 1.704            | 0.978   | 10.333               | 5.212                 |
| Eastern sub-Saharan                  | 0.025 | -3.035 | 1.070 | 4.191 | -5.714 | 0.123         | 2.767            | 0.973   | 10.562               | 6.322                 |
|                                      | 0.5   | -2.038 | 1.329 | 4.809 | -5.138 | 0.146         | 3.931            | 0.981   | 11.194               | 12.713                |
|                                      | 0.975 | -1.041 | 1.588 | 5.426 | -4.562 | 0.174         | 5.450            | 0.985   | 11.693               | 34.822                |

|                                                |       | int    | gam    | gbm    | lasso  | Nominal Range | Nominal Variance | ARI rho | Precision for IID.ID | Precision for CTRY.ID |
|------------------------------------------------|-------|--------|--------|--------|--------|---------------|------------------|---------|----------------------|-----------------------|
| <b>Africa quantiles</b>                        |       |        |        |        |        |               |                  |         |                      |                       |
| <b>Northern Africa quantiles</b>               | 0.025 | -1.826 | 0.595  | 0.828  | -1.566 | 0.059         | 0.566            | 0.892   | 7.326                | 0.589                 |
|                                                | 0.5   | -1.466 | 0.852  | 1.259  | -1.110 | 0.064         | 0.660            | 0.906   | 7.686                | 3.258                 |
|                                                | 0.975 | -1.106 | 1.108  | 1.690  | -0.655 | 0.071         | 0.789            | 0.920   | 7.961                | 14.658                |
| <b>Southern sub-Saharan Africa quantiles</b>   | 0.025 | -2.351 | -0.053 | -1.005 | 0.797  | 0.085         | 0.899            | 0.969   | 37.365               | 0.823                 |
|                                                | 0.5   | -1.633 | 0.355  | -0.586 | 1.231  | 0.097         | 1.184            | 0.975   | 39.502               | 2.126                 |
|                                                | 0.975 | -0.916 | 0.761  | -0.166 | 1.664  | 0.113         | 1.634            | 0.981   | 42.022               | 4.893                 |
| <b>Western sub-Saharan quantiles</b>           | 0.025 | -2.314 | 0.291  | 0.687  | -1.597 | 0.067         | 0.528            | 0.899   | 39.429               | 1086.605              |
|                                                | 0.5   | -1.960 | 0.796  | 1.240  | -1.030 | 0.078         | 0.674            | 0.918   | 43.600               | 11800.000             |
|                                                | 0.975 | -1.610 | 1.300  | 1.789  | -0.471 | 0.091         | 0.896            | 0.937   | 48.180               | 76273.200             |
| <b>Middle East quantiles</b>                   | 0.025 | -3.620 | 1.778  | 0.489  | -2.217 | 0.153         | 7.816            | 0.997   | 6.881                | 1.427                 |
|                                                | 0.5   | -1.334 | 2.090  | 0.840  | -1.930 | 0.187         | 11.634           | 0.998   | 7.079                | 3.136                 |
|                                                | 0.975 | 0.950  | 2.401  | 1.191  | -1.644 | 0.234         | 18.449           | 0.998   | 7.236                | 8.616                 |
| <b>Central Asia quantiles</b>                  | 0.025 | -2.183 | 0.982  | -0.051 | -0.698 | 0.052         | 0.677            | 0.921   | 6.845                | 0.422                 |
|                                                | 0.5   | -1.416 | 1.246  | 0.212  | -0.459 | 0.069         | 1.090            | 0.942   | 7.472                | 1.055                 |
|                                                | 0.975 | -0.649 | 1.510  | 0.476  | -0.219 | 0.090         | 1.705            | 0.958   | 7.907                | 2.702                 |
| <b>South Asia quantiles</b>                    | 0.025 | -2.183 | 0.982  | -0.051 | -0.698 | 0.052         | 0.677            | 0.921   | 6.845                | 0.422                 |
|                                                | 0.5   | -1.416 | 1.246  | 0.212  | -0.459 | 0.069         | 1.090            | 0.942   | 7.472                | 1.055                 |
|                                                | 0.975 | -0.649 | 1.510  | 0.476  | -0.219 | 0.090         | 1.705            | 0.958   | 7.907                | 2.702                 |
| <b>East Asia quantiles</b>                     | 0.025 | -1.835 | -0.044 | 0.370  | -0.597 | 0.050         | 0.153            | 0.844   | 10.801               | 0.564                 |
|                                                | 0.5   | -1.366 | 0.325  | 0.839  | -0.164 | 0.063         | 0.226            | 0.893   | 11.693               | 1.252                 |
|                                                | 0.975 | -0.899 | 0.693  | 1.309  | 0.270  | 0.077         | 0.298            | 0.921   | 12.981               | 2.613                 |
| <b>Southeast Asia quantiles</b>                | 0.025 | -1.835 | -0.044 | 0.370  | -0.597 | 0.050         | 0.153            | 0.844   | 10.801               | 0.564                 |
|                                                | 0.5   | -1.366 | 0.325  | 0.839  | -0.164 | 0.063         | 0.226            | 0.893   | 11.693               | 1.252                 |
|                                                | 0.975 | -0.899 | 0.693  | 1.309  | 0.270  | 0.077         | 0.298            | 0.921   | 12.981               | 2.613                 |
| <b>Oceania quantiles</b>                       | 0.025 | -1.835 | -0.044 | 0.370  | -0.597 | 0.050         | 0.153            | 0.844   | 10.801               | 0.564                 |
|                                                | 0.5   | -1.366 | 0.325  | 0.839  | -0.164 | 0.063         | 0.226            | 0.893   | 11.693               | 1.252                 |
|                                                | 0.975 | -0.899 | 0.693  | 1.309  | 0.270  | 0.077         | 0.298            | 0.921   | 12.981               | 2.613                 |
| <b>Andean South America quantiles</b>          | 0.025 | -2.497 | 1.048  | -0.915 | -2.495 | 0.166         | 1.990            | 0.770   | 120.364              | 0.381                 |
|                                                | 0.5   | -1.588 | 2.341  | -0.352 | -0.989 | 0.191         | 2.635            | 0.820   | 128.681              | 0.995                 |
|                                                | 0.975 | -0.680 | 3.633  | 0.210  | 0.516  | 0.218         | 3.416            | 0.858   | 137.869              | 2.355                 |
| <b>Tropical South America quantiles</b>        | 0.025 | -3.432 | 0.326  | -0.280 | -0.693 | 0.107         | 0.421            | 0.676   | 7.355                | 0.309                 |
|                                                | 0.5   | -2.461 | 0.875  | 0.204  | -0.077 | 0.172         | 1.031            | 0.885   | 7.879                | 1.090                 |
|                                                | 0.975 | -1.492 | 1.424  | 0.683  | 0.539  | 0.287         | 2.748            | 0.966   | 8.549                | 3.413                 |
| <b>Central America and Caribbean quantiles</b> | 0.025 | -2.220 | 1.084  | 0.442  | -1.246 | 0.059         | 0.622            | 0.914   | 15.666               | 1.069                 |
|                                                | 0.5   | -1.829 | 1.223  | 0.749  | -0.972 | 0.066         | 0.745            | 0.927   | 16.554               | 3.243                 |
|                                                | 0.975 | -1.438 | 1.361  | 1.056  | -0.697 | 0.074         | 0.897            | 0.939   | 17.336               | 8.374                 |

**Supplementary Table 13. Proportion with 6–11 years, men ages 15–49 fitted parameters**

Lower, median, and upper quantiles (0.025%, 0.50%, 0.975%) are displayed for the main parameters by region. The fixed effects covariates corresponding to the predicted ensemble rasters are shown in the first four columns, while fitted values for the spatiotemporal field hyperparameters and the precisions (inverse variance) for our random effects are shown in the last five columns.

|                             |       | int    | gam    | gbm    | lasso  | Nominal Range | Nominal Variance | AR1 rho | Precision for IID.ID | Precision for CTRY.ID |
|-----------------------------|-------|--------|--------|--------|--------|---------------|------------------|---------|----------------------|-----------------------|
| Central sub-Saharan Africa  | 0.025 | 0.649  | 2.992  | 3.150  | -6.857 | 0.043         | 0.231            | 0.884   | 5.533                | 5.079                 |
|                             | 0.5   | 0.867  | 3.548  | 3.737  | -6.284 | 0.053         | 0.285            | 0.914   | 5.970                | 7.611                 |
|                             | 0.975 | 1.084  | 4.103  | 4.322  | -5.711 | 0.074         | 0.366            | 0.943   | 6.478                | 12.046                |
| Eastern sub-Saharan Africa  | 0.025 | -0.572 | -2.196 | 1.874  | 0.609  | 0.088         | 0.906            | 0.960   | 12.607               | 0.199                 |
|                             | 0.5   | 0.475  | -1.995 | 2.110  | 0.885  | 0.103         | 1.208            | 0.970   | 13.172               | 0.636                 |
|                             | 0.975 | 1.522  | -1.794 | 2.346  | 1.161  | 0.126         | 1.756            | 0.980   | 13.828               | 1.878                 |
| Northern Africa             | 0.025 | 0.286  | 2.413  | 3.469  | -5.987 | 0.035         | 0.159            | 0.694   | 6.460                | 3.329                 |
|                             | 0.5   | 0.570  | 2.729  | 3.854  | -5.582 | 0.038         | 0.177            | 0.748   | 6.594                | 9.447                 |
|                             | 0.975 | 0.855  | 3.044  | 4.238  | -5.178 | 0.042         | 0.203            | 0.814   | 6.776                | 38.892                |
| Southern sub-Saharan Africa | 0.025 | 0.027  | -0.895 | -0.212 | 1.358  | 0.097         | 0.655            | 0.965   | 44.773               | 1.065                 |
|                             | 0.5   | 0.742  | -0.666 | 0.021  | 1.646  | 0.115         | 0.934            | 0.974   | 47.104               | 2.787                 |
|                             | 0.975 | 1.456  | -0.437 | 0.253  | 1.933  | 0.134         | 1.272            | 0.979   | 50.766               | 6.545                 |
| Western sub-Saharan Africa  | 0.025 | -0.324 | 1.196  | 0.036  | -1.311 | 0.041         | 0.162            | 0.915   | 46.092               | 6.625                 |
|                             | 0.5   | -0.103 | 1.507  | 0.406  | -0.913 | 0.047         | 0.201            | 0.931   | 51.269               | 31.698                |
|                             | 0.975 | 0.117  | 1.817  | 0.777  | -0.516 | 0.053         | 0.251            | 0.944   | 56.645               | 152.982               |
| Middle East                 | 0.025 | -0.662 | 2.041  | -0.023 | -2.019 | 0.108         | 4.059            | 0.995   | 6.475                | 1.655                 |
|                             | 0.5   | 0.726  | 2.355  | 0.344  | -1.699 | 0.132         | 5.957            | 0.996   | 6.826                | 4.041                 |
|                             | 0.975 | 2.112  | 2.670  | 0.710  | -1.379 | 0.161         | 8.874            | 0.998   | 7.044                | 9.353                 |
| Central Asia                | 0.025 | 0.130  | 1.637  | 0.938  | -2.595 | 0.081         | 0.657            | 0.776   | 15.241               | 1.510                 |
|                             | 0.5   | 0.669  | 2.023  | 1.290  | -2.313 | 0.103         | 1.023            | 0.837   | 16.208               | 3.929                 |
|                             | 0.975 | 1.207  | 2.408  | 1.642  | -2.031 | 0.131         | 1.618            | 0.884   | 17.468               | 9.577                 |
| South Asia                  | 0.025 | 0.130  | 1.637  | 0.938  | -2.595 | 0.081         | 0.657            | 0.776   | 15.241               | 1.510                 |
|                             | 0.5   | 0.669  | 2.023  | 1.290  | -2.313 | 0.103         | 1.023            | 0.837   | 16.208               | 3.929                 |
|                             | 0.975 | 1.207  | 2.408  | 1.642  | -2.031 | 0.131         | 1.618            | 0.884   | 17.468               | 9.577                 |
| East Asia                   | 0.025 | 0.130  | 1.637  | 0.938  | -2.595 | 0.081         | 0.657            | 0.776   | 15.241               | 1.510                 |
|                             | 0.5   | 0.669  | 2.023  | 1.290  | -2.313 | 0.103         | 1.023            | 0.837   | 16.208               | 3.929                 |
|                             | 0.975 | 1.207  | 2.408  | 1.642  | -2.031 | 0.131         | 1.618            | 0.884   | 17.468               | 9.577                 |
| Southeast Asia              | 0.025 | 0.130  | 1.637  | 0.938  | -2.595 | 0.081         | 0.657            | 0.776   | 15.241               | 1.510                 |
|                             | 0.5   | 0.669  | 2.023  | 1.290  | -2.313 | 0.103         | 1.023            | 0.837   | 16.208               | 3.929                 |
|                             | 0.975 | 1.207  | 2.408  | 1.642  | -2.031 | 0.131         | 1.618            | 0.884   | 17.468               | 9.577                 |
| Oceania                     | 0.025 | 0.130  | 1.637  | 0.938  | -2.595 | 0.081         | 0.657            | 0.776   | 15.241               | 1.510                 |
|                             | 0.5   | 0.669  | 2.023  | 1.290  | -2.313 | 0.103         | 1.023            | 0.837   | 16.208               | 3.929                 |
|                             | 0.975 | 1.207  | 2.408  | 1.642  | -2.031 | 0.131         | 1.618            | 0.884   | 17.468               | 9.577                 |
| Andean South                | 0.025 | 0.130  | 1.637  | 0.938  | -2.595 | 0.081         | 0.657            | 0.776   | 15.241               | 1.510                 |
|                             | 0.5   | 0.669  | 2.023  | 1.290  | -2.313 | 0.103         | 1.023            | 0.837   | 16.208               | 3.929                 |
|                             | 0.975 | 1.207  | 2.408  | 1.642  | -2.031 | 0.131         | 1.618            | 0.884   | 17.468               | 9.577                 |



|                                         |       | int    | gam   | gbm    | lasso  | Nominal Range | Nominal Variance | AR1 rho | Precision for IID.ID | Precision for CTRY.ID |
|-----------------------------------------|-------|--------|-------|--------|--------|---------------|------------------|---------|----------------------|-----------------------|
| America quantiles                       |       |        |       |        |        |               |                  |         |                      |                       |
| Tropical South                          | 0.025 | -0.004 | 0.042 | 1.382  | -2.062 | 0.051         | 0.278            | 0.923   | 7.015                | 5.267                 |
| America quantiles                       | 0.5   | 0.349  | 0.513 | 1.931  | -1.444 | 0.075         | 0.519            | 0.961   | 7.524                | 18.079                |
|                                         | 0.975 | 0.702  | 0.984 | 2.479  | -0.826 | 0.128         | 1.188            | 0.985   | 8.041                | 73.510                |
| Central America and Caribbean quantiles | 0.025 | -0.087 | 1.410 | -0.688 | -0.762 | 0.109         | 1.453            | 0.966   | 10.611               | 0.721                 |
|                                         | 0.5   | 0.640  | 1.681 | -0.284 | -0.396 | 0.126         | 1.965            | 0.975   | 11.383               | 1.785                 |
|                                         | 0.975 | 1.367  | 1.950 | 0.119  | -0.031 | 0.162         | 3.186            | 0.987   | 11.928               | 4.722                 |

**Supplementary Table 14. Proportion with zero years, women ages 20–24 fitted parameters**

Lower, median, and upper quantiles (0.025%, 0.50%, 0.975%) are displayed for the main parameters by region. The fixed effects covariates corresponding to the predicted ensemble rasters are shown in the first four columns, while fitted values for the spatiotemporal field hyperparameters and the precisions (inverse variance) for our random effects are shown in the last five columns.

|                                       |       | int    | gam    | gbm    | lasso  | Nominal Range | Nominal Variance | AR1 rho | Precision for IID.ID | Precision for CTRY.ID |
|---------------------------------------|-------|--------|--------|--------|--------|---------------|------------------|---------|----------------------|-----------------------|
| Central sub-Saharan Africa quantiles  | 0.025 | -2.355 | 1.501  | 0.817  | -3.368 | 0.067         | 1.389            | 0.959   | 18.561               | 1.144                 |
|                                       | 0.5   | -1.730 | 2.014  | 1.613  | -2.625 | 0.082         | 2.013            | 0.973   | 23.993               | 2.548                 |
|                                       | 0.975 | -1.105 | 2.527  | 2.404  | -1.882 | 0.100         | 2.850            | 0.981   | 28.764               | 5.555                 |
| Eastern sub-Saharan Africa quantiles  | 0.025 | -3.842 | -0.364 | 1.030  | -1.066 | 0.054         | 1.509            | 0.919   | 6.613                | 0.547                 |
|                                       | 0.5   | -3.168 | -0.099 | 1.608  | -0.509 | 0.063         | 1.935            | 0.940   | 7.202                | 2.198                 |
|                                       | 0.975 | -2.496 | 0.167  | 2.185  | 0.048  | 0.071         | 2.389            | 0.954   | 7.935                | 8.488                 |
| Northern Africa quantiles             | 0.025 | -2.160 | -0.363 | 1.419  | -1.266 | 0.043         | 1.188            | 0.905   | 10.788               | 4.802                 |
|                                       | 0.5   | -1.810 | -0.036 | 1.829  | -0.792 | 0.049         | 1.360            | 0.918   | 11.858               | 21.478                |
|                                       | 0.975 | -1.461 | 0.291  | 2.239  | -0.320 | 0.054         | 1.567            | 0.930   | 14.024               | 118.098               |
| Southern sub-Saharan Africa quantiles | 0.025 | -4.003 | 0.146  | -1.492 | -0.051 | 0.119         | 2.284            | 0.944   | 19.357               | 0.371                 |
|                                       | 0.5   | -2.618 | 0.965  | -0.712 | 0.748  | 0.146         | 3.349            | 0.959   | 21.176               | 0.988                 |
|                                       | 0.975 | -1.234 | 1.785  | 0.068  | 1.541  | 0.180         | 5.190            | 0.973   | 23.587               | 2.360                 |
| Western sub-Saharan Africa quantiles  | 0.025 | -3.163 | 0.276  | -1.717 | -1.650 | 0.047         | 0.634            | 0.903   | 1958.978             | 0.139                 |
|                                       | 0.5   | -2.120 | 0.746  | 0.099  | 0.156  | 0.056         | 0.838            | 0.927   | 15900.000            | 0.506                 |
|                                       | 0.975 | -1.082 | 1.216  | 1.916  | 1.956  | 0.064         | 1.041            | 0.950   | 77657.443            | 1.337                 |
|                                       | 0.025 | -5.741 | 2.155  | 1.107  | -4.781 | 0.167         | 14.290           | 0.992   | 4.873                | 1.924                 |

|                                                |       | int    | gam    | gbm    | lasso   | Nominal Range | Nominal Variance | ARI rho | Precision for IID.ID | Precision for CTRY.ID |
|------------------------------------------------|-------|--------|--------|--------|---------|---------------|------------------|---------|----------------------|-----------------------|
| <b>Middle East quantiles</b>                   | 0.5   | -2.650 | 2.948  | 1.999  | -3.946  | 0.222         | 26.122           | 0.997   | 5.165                | 6.742                 |
|                                                | 0.975 | 0.438  | 3.740  | 2.894  | -3.117  | 0.335         | 69.330           | 0.999   | 5.506                | 25.736                |
| <b>Central Asia quantiles</b>                  | 0.025 | -3.688 | 2.112  | -1.263 | -2.049  | 0.064         | 1.690            | 0.836   | 1.741                | 0.300                 |
|                                                | 0.5   | -2.672 | 2.839  | -0.571 | -1.264  | 0.089         | 2.615            | 0.887   | 1.843                | 0.836                 |
|                                                | 0.975 | -1.657 | 3.565  | 0.118  | -0.483  | 0.112         | 3.724            | 0.918   | 1.928                | 2.094                 |
| <b>South Asia quantiles</b>                    | 0.025 | -2.063 | 0.320  | 0.874  | -0.810  | 0.092         | 3.859            | 0.977   | 11.094               | 0.641                 |
|                                                | 0.5   | -1.153 | 0.457  | 1.127  | -0.585  | 0.105         | 4.939            | 0.981   | 11.797               | 1.285                 |
|                                                | 0.975 | -0.244 | 0.594  | 1.380  | -0.359  | 0.122         | 6.515            | 0.985   | 12.396               | 2.591                 |
| <b>East Asia quantiles</b>                     | 0.025 | -2.402 | 1.217  | 1.431  | -3.017  | 0.081         | 1.289            | 0.956   | 4.566                | 0.153                 |
|                                                | 0.5   | -1.410 | 1.651  | 1.872  | -2.523  | 0.121         | 2.519            | 0.977   | 4.800                | 0.506                 |
|                                                | 0.975 | -0.419 | 2.085  | 2.313  | -2.029  | 0.168         | 4.525            | 0.986   | 5.146                | 1.231                 |
| <b>Southeast Asia quantiles</b>                | 0.025 | -1.131 | 2.290  | 0.382  | -2.479  | 0.075         | 2.052            | 0.945   | 5.062                | 0.850                 |
|                                                | 0.5   | -0.557 | 2.513  | 0.686  | -2.199  | 0.082         | 2.472            | 0.956   | 5.310                | 1.852                 |
|                                                | 0.975 | 0.018  | 2.736  | 0.990  | -1.919  | 0.090         | 2.904            | 0.962   | 5.645                | 3.377                 |
| <b>Oceania quantiles</b>                       | 0.025 | -1.131 | 2.290  | 0.382  | -2.479  | 0.075         | 2.052            | 0.945   | 5.062                | 0.850                 |
|                                                | 0.5   | -0.557 | 2.513  | 0.686  | -2.199  | 0.082         | 2.472            | 0.956   | 5.310                | 1.852                 |
|                                                | 0.975 | 0.018  | 2.736  | 0.990  | -1.919  | 0.090         | 2.904            | 0.962   | 5.645                | 3.377                 |
| <b>Andean South America quantiles</b>          | 0.025 | -3.700 | -0.245 | 0.284  | 0.159   | 0.109         | 2.175            | 0.062   | 66.883               | 0.232                 |
|                                                | 0.5   | -2.813 | 0.066  | 0.552  | 0.382   | 0.123         | 2.717            | 0.274   | 74.146               | 0.653                 |
|                                                | 0.975 | -1.931 | 0.377  | 0.820  | 0.605   | 0.134         | 3.205            | 0.535   | 79.813               | 1.981                 |
| <b>Tropical South America quantiles</b>        | 0.025 | -4.007 | 0.048  | -0.184 | -0.085  | 0.049         | 0.715            | 0.862   | 1.928                | 0.085                 |
|                                                | 0.5   | -2.595 | 0.350  | 0.267  | 0.384   | 0.063         | 1.031            | 0.922   | 2.096                | 0.271                 |
|                                                | 0.975 | -1.184 | 0.652  | 0.717  | 0.852   | 0.076         | 1.409            | 0.952   | 2.246                | 0.778                 |
| <b>Central America and Caribbean quantiles</b> | 0.025 | -4.424 | 3.635  | 7.365  | -16.247 | 0.070         | 1.131            | 0.856   | 10.902               | 0.681                 |
|                                                | 0.5   | -3.919 | 4.773  | 9.921  | -13.692 | 0.084         | 1.478            | 0.906   | 12.900               | 2.533                 |
|                                                | 0.975 | -3.414 | 5.907  | 12.473 | -11.136 | 0.111         | 2.142            | 0.954   | 14.795               | 8.887                 |

**Supplementary Table 15. Proportion with 1–5 years, women ages 20–24 fitted parameters**

Lower, median, and upper quantiles (0.025%, 0.50%, 0.975%) are displayed for the main parameters by region. The fixed effects covariates corresponding to the predicted ensemble rasters are shown in the first four columns, while fitted values for the spatiotemporal field hyperparameters and the precisions (inverse variance) for our random effects are shown in the last five columns.

|                                    |       | <b>int</b> | <b>gam</b> | <b>gbm</b> | <b>lasso</b> | <b>Nominal Range</b> | <b>Nominal Variance</b> | <b>AR1 rho</b> | <b>Precision for IID.ID</b> | <b>Precision for CTRY.ID</b> |
|------------------------------------|-------|------------|------------|------------|--------------|----------------------|-------------------------|----------------|-----------------------------|------------------------------|
| <b>Central sub-Saharan Africa</b>  | 0.025 | -1.361     | 1.933      | 0.901      | -3.473       | 0.040                | 0.577                   | 0.906          | 13.977                      | 0.915                        |
|                                    | 0.5   | -0.949     | 2.378      | 1.514      | -2.893       | 0.052                | 0.729                   | 0.935          | 17.301                      | 1.970                        |
|                                    | 0.975 | -0.538     | 2.824      | 2.129      | -2.316       | 0.063                | 0.923                   | 0.952          | 25.541                      | 4.345                        |
| <b>Eastern sub-Saharan Africa</b>  | 0.025 | -5.721     | 1.702      | 1.927      | -5.518       | 0.292                | 19.621                  | 0.996          | 11.511                      | 27.606                       |
|                                    | 0.5   | -1.368     | 2.309      | 3.130      | -4.439       | 0.384                | 34.174                  | 0.998          | 12.521                      | 65.516                       |
|                                    | 0.975 | 2.981      | 2.915      | 4.333      | -3.361       | 0.516                | 62.652                  | 0.999          | 13.605                      | 338.168                      |
| <b>Northern Africa</b>             | 0.025 | -2.553     | -0.098     | 1.579      | -1.941       | 0.055                | 0.790                   | 0.837          | 28.437                      | 0.548                        |
|                                    | 0.5   | -1.979     | 0.212      | 2.143      | -1.355       | 0.061                | 0.932                   | 0.864          | 32.368                      | 1.919                        |
|                                    | 0.975 | -1.405     | 0.522      | 2.707      | -0.769       | 0.068                | 1.130                   | 0.894          | 36.976                      | 5.499                        |
| <b>Southern sub-Saharan Africa</b> | 0.025 | -3.323     | 1.221      | -2.410     | -1.537       | 0.094                | 1.381                   | 0.981          | 20.447                      | 0.297                        |
|                                    | 0.5   | -2.156     | 2.396      | -1.239     | -0.150       | 0.124                | 2.332                   | 0.989          | 22.515                      | 0.960                        |
|                                    | 0.975 | -0.990     | 3.569      | -0.070     | 1.228        | 0.167                | 4.145                   | 0.994          | 24.863                      | 2.225                        |
| <b>Western sub-Saharan Africa</b>  | 0.025 | -2.783     | 0.441      | -1.400     | -0.237       | 0.051                | 0.826                   | 0.864          | 111.925                     | 1.143                        |
|                                    | 0.5   | -2.145     | 0.952      | -0.564     | 0.614        | 0.075                | 1.293                   | 0.917          | 234.303                     | 9.209                        |
|                                    | 0.975 | -1.507     | 1.462      | 0.262      | 1.471        | 0.094                | 1.792                   | 0.939          | 623.105                     | 72.769                       |
| <b>Middle East</b>                 | 0.025 | -5.226     | 1.331      | 0.724      | -2.547       | 0.222                | 19.353                  | 0.996          | 6.593                       | 0.929                        |
|                                    | 0.5   | -1.327     | 1.816      | 1.240      | -2.056       | 0.274                | 29.524                  | 0.997          | 6.956                       | 2.744                        |
|                                    | 0.975 | 2.569      | 2.301      | 1.755      | -1.566       | 0.353                | 50.819                  | 0.999          | 7.279                       | 6.795                        |
| <b>Central Asia</b>                | 0.025 | -2.680     | 2.603      | 0.243      | -3.119       | 0.038                | 0.562                   | 0.873          | 8.530                       | 0.137                        |
|                                    | 0.5   | -1.860     | 3.062      | 0.609      | -2.671       | 0.054                | 0.898                   | 0.919          | 9.307                       | 0.560                        |
|                                    | 0.975 | -1.041     | 3.521      | 0.974      | -2.224       | 0.070                | 1.306                   | 0.944          | 10.110                      | 1.374                        |
| <b>South Asia</b>                  | 0.025 | -2.680     | 2.603      | 0.243      | -3.119       | 0.038                | 0.562                   | 0.873          | 8.530                       | 0.137                        |
|                                    | 0.5   | -1.860     | 3.062      | 0.609      | -2.671       | 0.054                | 0.898                   | 0.919          | 9.307                       | 0.560                        |
|                                    | 0.975 | -1.041     | 3.521      | 0.974      | -2.224       | 0.070                | 1.306                   | 0.944          | 10.110                      | 1.374                        |
| <b>East Asia</b>                   | 0.025 | -2.157     | 0.312      | 0.061      | -1.391       | 0.072                | 0.300                   | 0.749          | 9.630                       | 0.260                        |
|                                    | 0.5   | -1.493     | 0.897      | 0.816      | -0.712       | 0.105                | 0.466                   | 0.834          | 11.263                      | 0.656                        |
|                                    | 0.975 | -0.829     | 1.482      | 1.570      | -0.035       | 0.138                | 0.664                   | 0.891          | 12.781                      | 1.475                        |
| <b>Southeast Asia</b>              | 0.025 | -1.629     | 1.669      | 1.425      | -3.284       | 0.094                | 0.790                   | 0.902          | 16.382                      | 1.412                        |
|                                    | 0.5   | -1.058     | 1.974      | 1.879      | -2.853       | 0.131                | 1.390                   | 0.940          | 18.752                      | 2.614                        |
|                                    | 0.975 | -0.488     | 2.278      | 2.336      | -2.425       | 0.183                | 2.513                   | 0.965          | 21.478                      | 4.748                        |
| <b>Oceania</b>                     | 0.025 | -1.629     | 1.669      | 1.425      | -3.284       | 0.094                | 0.790                   | 0.902          | 16.382                      | 1.412                        |
|                                    | 0.5   | -1.058     | 1.974      | 1.879      | -2.853       | 0.131                | 1.390                   | 0.940          | 18.752                      | 2.614                        |
|                                    | 0.975 | -0.488     | 2.278      | 2.336      | -2.425       | 0.183                | 2.513                   | 0.965          | 21.478                      | 4.748                        |
|                                    | 0.025 | -2.949     | -0.606     | -0.194     | 0.588        | 0.066                | 0.850                   | 0.686          | 24.134                      | 0.302                        |
|                                    | 0.5   | -2.347     | -0.152     | 0.070      | 1.083        | 0.074                | 1.013                   | 0.777          | 25.717                      | 1.114                        |

|                                         |       | int    | gam   | gbm    | lasso  | Nominal Range | Nominal Variance | AR1 rho | Precision for IID.ID | Precision for CTRY.ID |
|-----------------------------------------|-------|--------|-------|--------|--------|---------------|------------------|---------|----------------------|-----------------------|
| Andean South America quantiles          | 0.975 | -1.747 | 0.302 | 0.331  | 1.578  | 0.083         | 1.216            | 0.842   | 27.693               | 2.851                 |
| Tropical South America quantiles        | 0.025 | -3.751 | 1.390 | -0.353 | -2.116 | 0.128         | 1.105            | 0.925   | 4.363                | 0.099                 |
|                                         | 0.5   | -2.573 | 2.014 | 0.314  | -1.324 | 0.181         | 2.017            | 0.963   | 4.921                | 12.044                |
|                                         | 0.975 | -1.396 | 2.638 | 0.964  | -0.527 | 0.267         | 4.122            | 0.986   | 5.569                | 155.288               |
| Central America and Caribbean quantiles | 0.025 | -3.071 | 2.057 | 1.390  | -3.857 | 0.092         | 1.721            | 0.963   | 16.075               | 1.016                 |
|                                         | 0.5   | -2.401 | 2.332 | 1.981  | -3.313 | 0.116         | 2.684            | 0.984   | 17.572               | 3.566                 |
|                                         | 0.975 | -1.732 | 2.607 | 2.571  | -2.770 | 0.172         | 5.551            | 0.997   | 18.838               | 11.121                |

**Supplementary Table 16. Proportion with 6–11 years, women ages 20–24 fitted parameters**

Lower, median, and upper quantiles (0.025%, 0.50%, 0.975%) are displayed for the main parameters by region. The fixed effects covariates corresponding to the predicted ensemble rasters are shown in the first four columns, while fitted values for the spatiotemporal field hyperparameters and the precisions (inverse variance) for our random effects are shown in the last five columns.

|                                       |       | int    | gam    | gbm    | lasso  | Nominal Range | Nominal Variance | AR1 rho | Precision for IID.ID | Precision for CTRY.ID |
|---------------------------------------|-------|--------|--------|--------|--------|---------------|------------------|---------|----------------------|-----------------------|
| Central sub-Saharan Africa quantiles  | 0.025 | 1.095  | 2.222  | 2.827  | -6.600 | 0.028         | 0.375            | 0.890   | 5.165                | 2.667                 |
|                                       | 0.5   | 1.347  | 3.023  | 3.667  | -5.690 | 0.038         | 0.474            | 0.926   | 6.097                | 6.450                 |
|                                       | 0.975 | 1.599  | 3.822  | 4.507  | -4.780 | 0.049         | 0.615            | 0.955   | 7.527                | 16.589                |
| Eastern sub-Saharan Africa quantiles  | 0.025 | -1.291 | 0.196  | 0.630  | -0.667 | 0.126         | 2.552            | 0.985   | 12.270               | 0.103                 |
|                                       | 0.5   | 0.212  | 0.421  | 0.932  | -0.353 | 0.158         | 3.931            | 0.990   | 13.016               | 0.404                 |
|                                       | 0.975 | 1.713  | 0.645  | 1.233  | -0.038 | 0.203         | 6.494            | 0.993   | 13.756               | 1.179                 |
| Northern Africa quantiles             | 0.025 | -0.085 | 1.278  | 1.978  | -3.300 | 0.039         | 0.331            | 0.735   | 17.254               | 1.349                 |
|                                       | 0.5   | 0.250  | 1.552  | 2.351  | -2.902 | 0.044         | 0.392            | 0.787   | 19.296               | 5.605                 |
|                                       | 0.975 | 0.584  | 1.825  | 2.723  | -2.506 | 0.049         | 0.452            | 0.822   | 21.780               | 18.279                |
| Southern sub-Saharan Africa quantiles | 0.025 | 0.305  | -0.172 | -0.121 | 0.461  | 0.057         | 0.370            | 0.955   | 37.259               | 0.538                 |
|                                       | 0.5   | 0.902  | 0.109  | 0.137  | 0.754  | 0.067         | 0.498            | 0.966   | 40.344               | 1.439                 |
|                                       | 0.975 | 1.499  | 0.389  | 0.395  | 1.048  | 0.079         | 0.682            | 0.974   | 43.311               | 3.331                 |
| Western sub-Saharan Africa quantiles  | 0.025 | -0.749 | 0.802  | 0.397  | -1.566 | 0.043         | 0.313            | 0.883   | 60.767               | 2.034                 |
|                                       | 0.5   | -0.387 | 1.136  | 0.906  | -1.042 | 0.050         | 0.392            | 0.910   | 82.730               | 12.575                |
|                                       | 0.975 | -0.025 | 1.470  | 1.415  | -0.519 | 0.059         | 0.494            | 0.932   | 113.272              | 118.979               |
|                                       | 0.025 | -1.339 | 1.313  | 0.213  | -1.662 | 0.134         | 6.277            | 0.995   | 8.099                | 0.838                 |
|                                       | 0.5   | 0.493  | 1.654  | 0.630  | -1.284 | 0.164         | 9.476            | 0.996   | 8.419                | 2.153                 |

|                                         |       | int    | gam    | gbm    | lasso  | Nominal Range | Nominal Variance | AR1 rho | Precision for IID.ID | Precision for CTRY.ID |
|-----------------------------------------|-------|--------|--------|--------|--------|---------------|------------------|---------|----------------------|-----------------------|
| Middle East quantiles                   | 0.975 | 2.323  | 1.995  | 1.046  | -0.906 | 0.217         | 17.309           | 0.998   | 8.686                | 4.826                 |
| Central Asia quantiles                  | 0.025 | -0.114 | 2.094  | 0.385  | -2.591 | 0.042         | 0.285            | 0.739   | 11.592               | 1.446                 |
|                                         | 0.5   | 0.226  | 2.476  | 0.757  | -2.233 | 0.050         | 0.367            | 0.812   | 12.498               | 4.230                 |
|                                         | 0.975 | 0.565  | 2.857  | 1.129  | -1.874 | 0.062         | 0.490            | 0.877   | 13.801               | 9.878                 |
| South Asia quantiles                    | 0.025 | -0.114 | 2.094  | 0.385  | -2.591 | 0.042         | 0.285            | 0.739   | 11.592               | 1.446                 |
|                                         | 0.5   | 0.226  | 2.476  | 0.757  | -2.233 | 0.050         | 0.367            | 0.812   | 12.498               | 4.230                 |
|                                         | 0.975 | 0.565  | 2.857  | 1.129  | -1.874 | 0.062         | 0.490            | 0.877   | 13.801               | 9.878                 |
| East Asia quantiles                     | 0.025 | -0.572 | 1.933  | 0.718  | -3.613 | 0.157         | 0.465            | 0.858   | 24.146               | 1.445                 |
|                                         | 0.5   | 0.019  | 2.639  | 1.276  | -2.914 | 0.226         | 0.816            | 0.918   | 27.838               | 7.522                 |
|                                         | 0.975 | 0.610  | 3.344  | 1.833  | -2.216 | 0.345         | 1.585            | 0.960   | 32.490               | 57.642                |
| Southeast Asia quantiles                | 0.025 | 0.166  | 2.287  | 2.306  | -4.937 | 0.103         | 0.602            | 0.880   | 14.088               | 1.768                 |
|                                         | 0.5   | 0.644  | 2.768  | 2.753  | -4.521 | 0.134         | 0.944            | 0.920   | 15.757               | 3.683                 |
|                                         | 0.975 | 1.121  | 3.248  | 3.201  | -4.105 | 0.176         | 1.500            | 0.948   | 17.913               | 7.259                 |
| Oceania quantiles                       | 0.025 | 0.166  | 2.287  | 2.306  | -4.937 | 0.103         | 0.602            | 0.880   | 14.088               | 1.768                 |
|                                         | 0.5   | 0.644  | 2.768  | 2.753  | -4.521 | 0.134         | 0.944            | 0.920   | 15.757               | 3.683                 |
|                                         | 0.975 | 1.121  | 3.248  | 3.201  | -4.105 | 0.176         | 1.500            | 0.948   | 17.913               | 7.259                 |
| Andean South America quantiles          | 0.025 | -0.567 | -0.130 | -0.042 | -0.203 | 0.076         | 0.628            | -0.848  | 95.774               | 1.166                 |
|                                         | 0.5   | -0.141 | 0.281  | 0.388  | 0.332  | 0.096         | 0.887            | 0.150   | 103.969              | 3.548                 |
|                                         | 0.975 | 0.285  | 0.691  | 0.817  | 0.866  | 0.110         | 1.104            | 0.663   | 111.272              | 10.622                |
| Tropical South America quantiles        | 0.025 | -0.423 | 0.418  | 0.612  | -1.814 | 0.063         | 0.427            | 0.905   | 8.970                | 1.794                 |
|                                         | 0.5   | 0.046  | 0.924  | 1.201  | -1.125 | 0.086         | 0.687            | 0.945   | 11.018               | 7.664                 |
|                                         | 0.975 | 0.514  | 1.429  | 1.790  | -0.437 | 0.121         | 1.310            | 0.976   | 12.889               | 25.633                |
| Central America and Caribbean quantiles | 0.025 | -0.423 | 0.418  | 0.612  | -1.814 | 0.063         | 0.427            | 0.905   | 8.970                | 1.794                 |
|                                         | 0.5   | 0.046  | 0.924  | 1.201  | -1.125 | 0.086         | 0.687            | 0.945   | 11.018               | 7.664                 |
|                                         | 0.975 | 0.514  | 1.429  | 1.790  | -0.437 | 0.121         | 1.310            | 0.976   | 12.889               | 25.633                |

**Supplementary Table 17. Proportion with zero years, men ages 20–24 fitted parameters**

Lower, median, and upper quantiles (0.025%, 0.50%, 0.975%) are displayed for the main parameters by region. The fixed effects covariates corresponding to the predicted ensemble rasters are shown in the first four columns, while fitted values for the spatiotemporal field hyperparameters and the precisions (inverse variance) for our random effects are shown in the last five columns.

|                     |       | int    | gam   | gbm    | lasso  | Nominal Range | Nominal Variance | AR1 rho | Precision for IID.ID | Precision for CTRY.ID |
|---------------------|-------|--------|-------|--------|--------|---------------|------------------|---------|----------------------|-----------------------|
| Central sub-Saharan | 0.025 | -3.217 | 2.242 | -0.395 | -4.313 | 0.122         | 1.549            | 0.961   | 19.928               | 1.912                 |
|                     | 0.5   | -2.225 | 3.172 | 0.873  | -3.043 | 0.157         | 2.446            | 0.976   | 23.879               | 4.535                 |
|                     | 0.975 | -1.234 | 4.102 | 2.139  | -1.777 | 0.207         | 4.258            | 0.986   | 30.630               | 10.275                |

|                                              |       | int    | gam    | gbm    | lasso   | Nominal Range | Nominal Variance | AR1 rho | Precision for IID.ID | Precision for CTRY.ID |
|----------------------------------------------|-------|--------|--------|--------|---------|---------------|------------------|---------|----------------------|-----------------------|
| <b>Africa quantiles</b>                      |       |        |        |        |         |               |                  |         |                      |                       |
| <b>Eastern sub-Saharan Africa quantiles</b>  | 0.025 | -3.744 | -0.305 | 1.139  | -1.475  | 0.044         | 0.948            | 0.943   | 7.377                | 0.848                 |
|                                              | 0.5   | -3.217 | 0.035  | 1.809  | -0.844  | 0.054         | 1.247            | 0.957   | 8.076                | 3.399                 |
|                                              | 0.975 | -2.690 | 0.374  | 2.480  | -0.214  | 0.063         | 1.559            | 0.969   | 9.084                | 11.824                |
| <b>Northern Africa quantiles</b>             | 0.025 | -2.872 | -0.383 | 0.991  | -1.643  | 0.046         | 0.802            | 0.887   | 14.160               | 1.114                 |
|                                              | 0.5   | -2.381 | 0.041  | 1.783  | -0.824  | 0.053         | 0.982            | 0.912   | 15.643               | 3.450                 |
|                                              | 0.975 | -1.891 | 0.465  | 2.575  | -0.006  | 0.060         | 1.176            | 0.929   | 17.793               | 10.420                |
| <b>Southern sub-Saharan Africa quantiles</b> | 0.025 | -3.685 | -0.930 | -2.080 | 1.112   | 0.107         | 1.947            | 0.939   | 26.783               | 0.408                 |
|                                              | 0.5   | -2.368 | 0.052  | -1.143 | 2.094   | 0.131         | 3.171            | 0.964   | 29.513               | 1.192                 |
|                                              | 0.975 | -1.052 | 1.033  | -0.204 | 3.065   | 0.159         | 4.716            | 0.975   | 31.770               | 2.826                 |
| <b>Western sub-Saharan Africa quantiles</b>  | 0.025 | -3.581 | 1.103  | -2.727 | -5.581  | 0.048         | 0.289            | 0.891   | 1931.458             | 0.234                 |
|                                              | 0.5   | -2.679 | 2.313  | 0.778  | -2.087  | 0.058         | 0.379            | 0.926   | 15391.062            | 0.721                 |
|                                              | 0.975 | -1.780 | 3.520  | 4.340  | 1.340   | 0.072         | 0.517            | 0.951   | 73400.000            | 2.020                 |
| <b>Middle East quantiles</b>                 | 0.025 | -5.562 | 1.300  | 2.341  | -5.648  | 0.181         | 12.462           | 0.994   | 6.195                | 4.288                 |
|                                              | 0.5   | -2.380 | 2.225  | 3.436  | -4.658  | 0.229         | 19.735           | 0.996   | 6.985                | 17.661                |
|                                              | 0.975 | 0.800  | 3.148  | 4.533  | -3.676  | 0.294         | 32.744           | 0.997   | 7.530                | 94.822                |
| <b>Central Asia quantiles</b>                | 0.025 | -3.984 | 0.373  | -1.050 | -2.044  | 0.088         | 1.383            | 0.859   | 2.295                | 0.268                 |
|                                              | 0.5   | -3.010 | 1.609  | 0.131  | -0.732  | 0.106         | 1.922            | 0.905   | 2.561                | 0.790                 |
|                                              | 0.975 | -2.038 | 2.842  | 1.304  | 0.576   | 0.134         | 2.858            | 0.944   | 2.751                | 2.095                 |
| <b>South Asia quantiles</b>                  | 0.025 | -2.769 | 0.290  | 0.743  | -0.933  | 0.103         | 3.440            | 0.967   | 14.197               | 1.165                 |
|                                              | 0.5   | -1.854 | 0.502  | 1.104  | -0.606  | 0.120         | 4.650            | 0.974   | 15.010               | 2.549                 |
|                                              | 0.975 | -0.940 | 0.714  | 1.465  | -0.280  | 0.141         | 6.599            | 0.981   | 16.137               | 4.959                 |
| <b>East Asia quantiles</b>                   | 0.025 | -2.809 | 1.648  | 1.210  | -4.370  | 0.092         | 1.112            | 0.939   | 6.524                | 0.379                 |
|                                              | 0.5   | -2.018 | 2.510  | 1.943  | -3.453  | 0.127         | 1.947            | 0.969   | 7.223                | 0.930                 |
|                                              | 0.975 | -1.228 | 3.372  | 2.676  | -2.537  | 0.209         | 4.730            | 0.992   | 7.908                | 3.309                 |
| <b>Southeast Asia quantiles</b>              | 0.025 | -1.819 | 1.898  | 0.655  | -2.483  | 0.079         | 1.708            | 0.935   | 6.282                | 1.009                 |
|                                              | 0.5   | -1.229 | 2.129  | 1.019  | -2.147  | 0.090         | 2.206            | 0.953   | 6.611                | 1.962                 |
|                                              | 0.975 | -0.639 | 2.359  | 1.382  | -1.813  | 0.104         | 2.753            | 0.964   | 7.088                | 3.654                 |
| <b>Oceania quantiles</b>                     | 0.025 | -1.819 | 1.898  | 0.655  | -2.483  | 0.079         | 1.708            | 0.935   | 6.282                | 1.009                 |
|                                              | 0.5   | -1.229 | 2.129  | 1.019  | -2.147  | 0.090         | 2.206            | 0.953   | 6.611                | 1.962                 |
|                                              | 0.975 | -0.639 | 2.359  | 1.382  | -1.813  | 0.104         | 2.753            | 0.964   | 7.088                | 3.654                 |
| <b>Andean South America quantiles</b>        | 0.025 | -1.819 | 1.898  | 0.655  | -2.483  | 0.079         | 1.708            | 0.935   | 6.282                | 1.009                 |
|                                              | 0.5   | -1.229 | 2.129  | 1.019  | -2.147  | 0.090         | 2.206            | 0.953   | 6.611                | 1.962                 |
|                                              | 0.975 | -0.639 | 2.359  | 1.382  | -1.813  | 0.104         | 2.753            | 0.964   | 7.088                | 3.654                 |
| <b>Tropical South America quantiles</b>      | 0.025 | -4.183 | 0.273  | -0.804 | -0.385  | 0.052         | 0.505            | 0.879   | 4.509                | 0.120                 |
|                                              | 0.5   | -2.936 | 0.783  | -0.101 | 0.321   | 0.069         | 0.745            | 0.935   | 5.077                | 0.368                 |
|                                              | 0.975 | -1.689 | 1.292  | 0.604  | 1.017   | 0.086         | 1.064            | 0.967   | 5.670                | 1.067                 |
| <b>Central America and</b>                   | 0.025 | -4.351 | 2.080  | 7.016  | -14.610 | 0.073         | 0.793            | 0.862   | 13.833               | 0.696                 |
|                                              | 0.5   | -3.825 | 3.051  | 9.856  | -11.906 | 0.093         | 1.200            | 0.926   | 16.068               | 2.352                 |
|                                              | 0.975 | -3.299 | 4.019  | 12.696 | -9.206  | 0.121         | 1.890            | 0.963   | 20.264               | 6.495                 |

|                     | int | gam | gbm | lasso | Nominal Range | Nominal Variance | AR1 rho | Precision for IID.ID | Precision for CTRY.ID |
|---------------------|-----|-----|-----|-------|---------------|------------------|---------|----------------------|-----------------------|
| Caribbean quantiles |     |     |     |       |               |                  |         |                      |                       |

**Supplementary Table 18. Proportion with 1–5 years, men ages 20–24 fitted parameters**

Lower, median, and upper quantiles (0.025%, 0.50%, 0.975%) are displayed for the main parameters by region. The fixed effects covariates corresponding to the predicted ensemble rasters are shown in the first four columns, while fitted values for the spatiotemporal field hyperparameters and the precisions (inverse variance) for our random effects are shown in the last five columns.

|                                       | int   | gam    | gbm    | lasso  | Nominal Range | Nominal Variance | AR1 rho | Precision for IID.ID | Precision for CTRY.ID |           |
|---------------------------------------|-------|--------|--------|--------|---------------|------------------|---------|----------------------|-----------------------|-----------|
| Central sub-Saharan Africa quantiles  | 0.025 | -1.772 | 1.761  | 0.402  | -2.963        | 0.058            | 0.580   | 0.896                | 28.927                | 1.835     |
|                                       | 0.5   | -1.405 | 2.227  | 1.041  | -2.269        | 0.072            | 0.820   | 0.929                | 37.571                | 4.495     |
|                                       | 0.975 | -1.039 | 2.694  | 1.683  | -1.578        | 0.091            | 1.104   | 0.952                | 50.190                | 10.452    |
| Eastern sub-Saharan Africa quantiles  | 0.025 | -5.678 | 1.370  | 4.347  | -7.015        | 0.309            | 16.102  | 0.995                | 11.428                | 1017.872  |
|                                       | 0.5   | -1.324 | 1.752  | 5.336  | -6.088        | 0.419            | 29.546  | 0.997                | 12.291                | 4791.368  |
|                                       | 0.975 | 3.027  | 2.133  | 6.324  | -5.161        | 0.585            | 57.237  | 0.998                | 13.150                | 16698.411 |
| Northern Africa quantiles             | 0.025 | -2.736 | -0.198 | 1.168  | -1.667        | 0.075            | 0.915   | 0.875                | 29.948                | 0.613     |
|                                       | 0.5   | -2.104 | 0.176  | 1.811  | -0.987        | 0.087            | 1.204   | 0.903                | 34.637                | 2.218     |
|                                       | 0.975 | -1.473 | 0.549  | 2.453  | -0.307        | 0.100            | 1.508   | 0.920                | 39.051                | 6.688     |
| Southern sub-Saharan Africa quantiles | 0.025 | -2.710 | -0.299 | -0.176 | -1.048        | 0.077            | 0.807   | 0.978                | 27.941                | 0.616     |
|                                       | 0.5   | -1.958 | 0.544  | 0.607  | -0.148        | 0.097            | 1.252   | 0.986                | 30.596                | 1.694     |
|                                       | 0.975 | -1.206 | 1.388  | 1.391  | 0.740         | 0.137            | 2.201   | 0.992                | 33.816                | 3.871     |
| Western sub-Saharan Africa quantiles  | 0.025 | -2.872 | -0.373 | 0.285  | -2.225        | 0.082            | 0.749   | 0.855                | 1810.944              | 2255.081  |
|                                       | 0.5   | -2.370 | 0.361  | 1.570  | -0.928        | 0.100            | 1.000   | 0.893                | 15300.000             | 17800.000 |
|                                       | 0.975 | -1.863 | 1.093  | 2.849  | 0.369         | 0.119            | 1.353   | 0.922                | 83981.503             | 93530.334 |
| Middle East quantiles                 | 0.025 | -5.573 | 1.550  | 0.917  | -2.968        | 0.282            | 30.095  | 0.998                | 7.657                 | 1.862     |
|                                       | 0.5   | -0.519 | 2.038  | 1.441  | -2.479        | 0.376            | 53.347  | 0.999                | 8.105                 | 4.042     |
|                                       | 0.975 | 4.532  | 2.526  | 1.965  | -1.991        | 0.499            | 96.435  | 0.999                | 8.577                 | 8.551     |
| Central Asia quantiles                | 0.025 | -2.734 | 1.299  | -0.122 | -1.432        | 0.042            | 0.565   | 0.911                | 9.343                 | 0.244     |
|                                       | 0.5   | -1.883 | 1.718  | 0.298  | -1.015        | 0.051            | 0.780   | 0.940                | 10.157                | 0.628     |
|                                       | 0.975 | -1.033 | 2.137  | 0.718  | -0.600        | 0.066            | 1.107   | 0.961                | 11.201                | 1.500     |
| South Asia quantiles                  | 0.025 | -2.734 | 1.299  | -0.122 | -1.432        | 0.042            | 0.565   | 0.911                | 9.343                 | 0.244     |
|                                       | 0.5   | -1.883 | 1.718  | 0.298  | -1.015        | 0.051            | 0.780   | 0.940                | 10.157                | 0.628     |
|                                       | 0.975 | -1.033 | 2.137  | 0.718  | -0.600        | 0.066            | 1.107   | 0.961                | 11.201                | 1.500     |
| East Asia quantiles                   | 0.025 | -2.019 | 0.311  | -0.073 | -1.207        | 0.073            | 0.231   | 0.777                | 11.400                | 0.328     |
|                                       | 0.5   | -1.549 | 0.925  | 0.635  | -0.560        | 0.110            | 0.382   | 0.863                | 13.065                | 1.334     |
|                                       | 0.975 | -1.079 | 1.538  | 1.344  | 0.085         | 0.153            | 0.582   | 0.910                | 14.954                | 3.620     |

|                                      | int   | gam    | gbm    | lasso  | Nominal Range | Nominal Variance | ARI rho | Precision for IID.ID | Precision for CTRY.ID |        |
|--------------------------------------|-------|--------|--------|--------|---------------|------------------|---------|----------------------|-----------------------|--------|
| <b>Southeast Asia</b>                | 0.025 | -2.112 | 1.646  | 1.001  | -3.086        | 0.113            | 0.837   | 0.909                | 17.887                | 1.412  |
| <b>quantiles</b>                     | 0.5   | -1.458 | 2.029  | 1.537  | -2.566        | 0.155            | 1.475   | 0.944                | 20.534                | 2.761  |
|                                      | 0.975 | -0.805 | 2.411  | 2.080  | -2.053        | 0.214            | 2.679   | 0.967                | 23.758                | 5.133  |
| <b>Oceania</b>                       | 0.025 | -2.112 | 1.646  | 1.001  | -3.086        | 0.113            | 0.837   | 0.909                | 17.887                | 1.412  |
| <b>quantiles</b>                     | 0.5   | -1.458 | 2.029  | 1.537  | -2.566        | 0.155            | 1.475   | 0.944                | 20.534                | 2.761  |
|                                      | 0.975 | -0.805 | 2.411  | 2.080  | -2.053        | 0.214            | 2.679   | 0.967                | 23.758                | 5.133  |
| <b>Andean South America</b>          | 0.025 | -2.928 | -0.706 | -1.210 | 0.240         | 0.155            | 0.881   | 0.820                | 27541.651             | 0.301  |
| <b>quantiles</b>                     | 0.5   | -2.089 | 0.136  | -0.422 | 1.290         | 0.182            | 1.180   | 0.865                | 63216.340             | 0.820  |
|                                      | 0.975 | -1.250 | 0.975  | 0.357  | 2.340         | 0.216            | 1.590   | 0.901                | 143000.000            | 2.030  |
| <b>Tropical South America</b>        | 0.025 | -4.966 | -0.703 | -1.066 | -0.100        | 0.207            | 1.458   | 0.940                | 9.848                 | 0.340  |
| <b>quantiles</b>                     | 0.5   | -2.409 | 0.166  | -0.179 | 1.026         | 0.361            | 4.576   | 0.984                | 12.139                | 2.041  |
|                                      | 0.975 | 0.146  | 1.033  | 0.660  | 2.172         | 0.807            | 22.704  | 0.998                | 15.008                | 10.842 |
| <b>Central America and Caribbean</b> | 0.025 | -3.094 | 1.721  | 0.956  | -2.876        | 0.091            | 1.304   | 0.941                | 14.380                | 0.745  |
| <b>quantiles</b>                     | 0.5   | -2.479 | 1.956  | 1.470  | -2.426        | 0.106            | 1.771   | 0.957                | 15.642                | 2.450  |
|                                      | 0.975 | -1.863 | 2.190  | 1.984  | -1.976        | 0.130            | 2.547   | 0.971                | 16.712                | 6.743  |

**Supplementary Table 19. Proportion with 6–11 years, men ages 20–24 fitted parameters**

Lower, median, and upper quantiles (0.025%, 0.50%, 0.975%) are displayed for the main parameters by region. The fixed effects covariates corresponding to the predicted ensemble rasters are shown in the first four columns, while fitted values for the spatiotemporal field hyperparameters and the precisions (inverse variance) for our random effects are shown in the last five columns.

|                                   | int   | gam    | gbm    | lasso  | Nominal Range | Nominal Variance | ARI rho | Precision for IID.ID | Precision for CTRY.ID |        |
|-----------------------------------|-------|--------|--------|--------|---------------|------------------|---------|----------------------|-----------------------|--------|
| <b>Central sub-Saharan Africa</b> | 0.025 | 0.718  | 1.118  | 2.371  | -4.859        | 0.041            | 0.394   | 0.860                | 10.158                | 2.798  |
| <b>quantiles</b>                  | 0.5   | 0.968  | 1.826  | 3.157  | -3.983        | 0.051            | 0.501   | 0.906                | 13.482                | 7.772  |
|                                   | 0.975 | 1.218  | 2.532  | 3.943  | -3.107        | 0.064            | 0.660   | 0.935                | 16.661                | 22.624 |
| <b>Eastern sub-Saharan Africa</b> | 0.025 | -1.340 | 0.143  | 0.853  | -0.868        | 0.142            | 2.302   | 0.984                | 12.835                | 0.129  |
| <b>quantiles</b>                  | 0.5   | 0.177  | 0.392  | 1.170  | -0.562        | 0.177            | 3.496   | 0.989                | 13.451                | 0.437  |
|                                   | 0.975 | 1.694  | 0.641  | 1.487  | -0.256        | 0.231            | 5.835   | 0.993                | 14.320                | 1.315  |
| <b>Northern Africa</b>            | 0.025 | -0.206 | 0.917  | 2.998  | -4.338        | 0.043            | 0.260   | 0.574                | 26.201                | 0.628  |
| <b>quantiles</b>                  | 0.5   | 0.283  | 1.273  | 3.498  | -3.772        | 0.049            | 0.310   | 0.666                | 29.334                | 2.196  |
|                                   | 0.975 | 0.772  | 1.630  | 3.999  | -3.207        | 0.055            | 0.355   | 0.727                | 32.877                | 6.018  |
| <b>Southern sub-Saharan</b>       | 0.025 | 0.100  | -0.285 | -0.258 | 0.658         | 0.062            | 0.334   | 0.948                | 39.634                | 0.957  |
| <b>quantiles</b>                  | 0.5   | 0.596  | 0.003  | 0.015  | 0.981         | 0.076            | 0.479   | 0.962                | 42.919                | 2.601  |
|                                   | 0.975 | 1.092  | 0.292  | 0.288  | 1.305         | 0.094            | 0.717   | 0.973                | 46.447                | 6.147  |



|                                                |       | int    | gam    | gbm    | lasso  | Nominal Range | Nominal Variance | AR1 rho | Precision for HD.ID | Precision for CTRY.ID |
|------------------------------------------------|-------|--------|--------|--------|--------|---------------|------------------|---------|---------------------|-----------------------|
| <b>Africa quantiles</b>                        |       |        |        |        |        |               |                  |         |                     |                       |
| <b>Western sub-Saharan quantiles</b>           | 0.025 | -0.604 | 1.041  | 0.061  | -1.531 | 0.048         | 0.252            | 0.898   | 105.570             | 12.885                |
|                                                | 0.5   | -0.359 | 1.398  | 0.580  | -0.978 | 0.057         | 0.332            | 0.923   | 149.667             | 123.037               |
|                                                | 0.975 | -0.114 | 1.754  | 1.099  | -0.425 | 0.068         | 0.434            | 0.943   | 222.815             | 2192.364              |
| <b>Middle East quantiles</b>                   | 0.025 | -0.521 | 1.214  | 0.514  | -1.957 | 0.096         | 3.592            | 0.994   | 9.184               | 1.087                 |
|                                                | 0.5   | 0.624  | 1.586  | 0.965  | -1.550 | 0.116         | 5.136            | 0.995   | 9.638               | 3.132                 |
|                                                | 0.975 | 1.769  | 1.958  | 1.415  | -1.144 | 0.150         | 8.305            | 0.997   | 9.995               | 7.344                 |
| <b>Central Asia quantiles</b>                  | 0.025 | 0.124  | 1.338  | 0.938  | -2.503 | 0.040         | 0.275            | 0.463   | 12.114              | 1.370                 |
|                                                | 0.5   | 0.469  | 1.787  | 1.384  | -2.171 | 0.048         | 0.343            | 0.638   | 13.233              | 3.823                 |
|                                                | 0.975 | 0.813  | 2.235  | 1.830  | -1.840 | 0.060         | 0.437            | 0.755   | 14.274              | 8.920                 |
| <b>South Asia quantiles</b>                    | 0.025 | 0.124  | 1.338  | 0.938  | -2.503 | 0.040         | 0.275            | 0.463   | 12.114              | 1.370                 |
|                                                | 0.5   | 0.469  | 1.787  | 1.384  | -2.171 | 0.048         | 0.343            | 0.638   | 13.233              | 3.823                 |
|                                                | 0.975 | 0.813  | 2.235  | 1.830  | -1.840 | 0.060         | 0.437            | 0.755   | 14.274              | 8.920                 |
| <b>East Asia quantiles</b>                     | 0.025 | -0.896 | 0.792  | 0.925  | -2.679 | 0.192         | 0.463            | 0.873   | 38.058              | 1.636                 |
|                                                | 0.5   | 0.074  | 1.482  | 1.542  | -2.024 | 0.317         | 1.105            | 0.943   | 45.137              | 7.166                 |
|                                                | 0.975 | 1.043  | 2.172  | 2.159  | -1.371 | 0.523         | 2.579            | 0.974   | 52.868              | 38.834                |
| <b>Southeast Asia quantiles</b>                | 0.025 | -0.140 | 1.377  | 2.107  | -3.732 | 0.120         | 0.642            | 0.874   | 16.595              | 1.505                 |
|                                                | 0.5   | 0.423  | 1.831  | 2.505  | -3.336 | 0.166         | 1.135            | 0.920   | 18.458              | 3.140                 |
|                                                | 0.975 | 0.985  | 2.285  | 2.903  | -2.940 | 0.242         | 2.190            | 0.954   | 20.592              | 6.220                 |
| <b>Oceania quantiles</b>                       | 0.025 | -0.140 | 1.377  | 2.107  | -3.732 | 0.120         | 0.642            | 0.874   | 16.595              | 1.505                 |
|                                                | 0.5   | 0.423  | 1.831  | 2.505  | -3.336 | 0.166         | 1.135            | 0.920   | 18.458              | 3.140                 |
|                                                | 0.975 | 0.985  | 2.285  | 2.903  | -2.940 | 0.242         | 2.190            | 0.954   | 20.592              | 6.220                 |
| <b>Andean South America quantiles</b>          | 0.025 | -0.570 | 0.509  | -0.575 | -0.440 | 0.054         | 0.342            | -0.506  | 122.050             | 0.752                 |
|                                                | 0.5   | 0.000  | 0.954  | -0.196 | 0.242  | 0.091         | 0.820            | 0.511   | 130.606             | 1.963                 |
|                                                | 0.975 | 0.569  | 1.399  | 0.182  | 0.924  | 0.118         | 1.276            | 0.798   | 138.658             | 6.597                 |
| <b>Tropical South America quantiles</b>        | 0.025 | -0.287 | -0.176 | 0.884  | -1.684 | 0.057         | 0.298            | 0.852   | 7.893               | 3.558                 |
|                                                | 0.5   | 0.062  | 0.391  | 1.531  | -0.922 | 0.077         | 0.475            | 0.916   | 9.195               | 19.078                |
|                                                | 0.975 | 0.410  | 0.958  | 2.177  | -0.160 | 0.109         | 0.785            | 0.955   | 10.467              | 81.096                |
| <b>Central America and Caribbean quantiles</b> | 0.025 | -0.431 | 1.753  | 0.685  | -2.575 | 0.110         | 1.297            | 0.943   | 11.487              | 0.553                 |
|                                                | 0.5   | 0.336  | 2.028  | 1.129  | -2.157 | 0.130         | 1.786            | 0.958   | 12.382              | 1.395                 |
|                                                | 0.975 | 1.102  | 2.303  | 1.572  | -1.740 | 0.159         | 2.596            | 0.971   | 13.827              | 3.544                 |

**Supplementary Table 20. Mean years, women ages 15–49 fitted parameters**

Lower, median, and upper quantiles (0.025%, 0.50%, 0.975%) are displayed for the main parameters by region. The fixed effects covariates corresponding to the predicted ensemble rasters are shown in the first four columns, while fitted values for the spatiotemporal field hyperparameters and the precisions (inverse variance) for our random effects are shown in the last five columns.

|                                       |       | int    | gam   | gbm    | lasso | Nominal Range | Nominal Variance | ARI rho | Precision for IID.ID | Precision for CTRY.ID |
|---------------------------------------|-------|--------|-------|--------|-------|---------------|------------------|---------|----------------------|-----------------------|
| Central sub-Saharan Africa quantiles  | 0.025 | -0.752 | 0.348 | 0.163  | 0.304 | 0.067         | 1.426            | 0.961   | 4.722                | 0.930                 |
|                                       | 0.5   | -0.186 | 0.395 | 0.238  | 0.367 | 0.083         | 2.007            | 0.974   | 5.516                | 2.360                 |
|                                       | 0.975 | 0.380  | 0.443 | 0.313  | 0.430 | 0.106         | 3.070            | 0.984   | 7.397                | 5.520                 |
| Eastern sub-Saharan Africa quantiles  | 0.025 | -0.753 | 0.526 | 0.180  | 0.154 | 0.017         | 1.323            | 0.985   | 4.078                | 0.616                 |
|                                       | 0.5   | -0.188 | 0.557 | 0.237  | 0.206 | 0.031         | 2.038            | 0.992   | 4.375                | 2.341                 |
|                                       | 0.975 | 0.376  | 0.588 | 0.294  | 0.257 | 0.041         | 2.647            | 0.995   | 4.685                | 7.749                 |
| Northern Africa quantiles             | 0.025 | -0.666 | 0.393 | -0.004 | 0.508 | 0.042         | 1.774            | 0.917   | 6.480                | 0.913                 |
|                                       | 0.5   | -0.135 | 0.418 | 0.037  | 0.546 | 0.049         | 2.169            | 0.932   | 6.997                | 3.463                 |
|                                       | 0.975 | 0.394  | 0.442 | 0.078  | 0.583 | 0.055         | 2.619            | 0.944   | 7.656                | 12.674                |
| Southern sub-Saharan Africa quantiles | 0.025 | -1.696 | 0.929 | -0.494 | 0.419 | 0.104         | 2.910            | 0.971   | 6.255                | 0.140                 |
|                                       | 0.5   | -0.597 | 0.972 | -0.449 | 0.477 | 0.129         | 4.329            | 0.982   | 6.601                | 0.392                 |
|                                       | 0.975 | 0.502  | 1.015 | -0.403 | 0.535 | 0.152         | 6.071            | 0.987   | 6.988                | 0.895                 |
| Western sub-Saharan Africa quantiles  | 0.025 | -1.416 | 0.644 | -0.051 | 0.269 | 0.031         | 1.705            | 0.937   | 9.517                | 0.166                 |
|                                       | 0.5   | -0.523 | 0.683 | -0.003 | 0.320 | 0.035         | 1.993            | 0.952   | 13.151               | 0.613                 |
|                                       | 0.975 | 0.369  | 0.722 | 0.044  | 0.372 | 0.040         | 2.341            | 0.966   | 16.962               | 2.607                 |
| Middle East quantiles                 | 0.025 | -1.381 | 0.495 | 0.104  | 0.260 | 0.152         | 30.654           | 0.999   | 2.948                | 0.325                 |
|                                       | 0.5   | -0.013 | 0.529 | 0.160  | 0.311 | 0.236         | 73.899           | 0.999   | 3.081                | 0.915                 |
|                                       | 0.975 | 1.355  | 0.563 | 0.216  | 0.362 | 0.349         | 161.160          | 1.000   | 3.232                | 2.523                 |
| Central Asia quantiles                | 0.025 | -0.602 | 0.613 | 0.037  | 0.163 | 0.034         | 1.211            | 0.949   | 2.448                | 0.176                 |
|                                       | 0.5   | 0.220  | 0.656 | 0.108  | 0.236 | 0.041         | 1.623            | 0.966   | 2.621                | 0.460                 |
|                                       | 0.975 | 1.042  | 0.699 | 0.178  | 0.309 | 0.052         | 2.199            | 0.979   | 2.797                | 1.099                 |
| South Asia quantiles                  | 0.025 | -1.180 | 0.214 | 0.208  | 0.496 | 0.147         | 15.591           | 0.991   | 4.564                | 0.296                 |
|                                       | 0.5   | 0.059  | 0.234 | 0.242  | 0.525 | 0.175         | 22.281           | 0.993   | 4.848                | 0.596                 |
|                                       | 0.975 | 1.297  | 0.253 | 0.275  | 0.553 | 0.219         | 34.530           | 0.995   | 5.419                | 1.076                 |
| East Asia quantiles                   | 0.025 | -0.936 | 0.345 | -0.003 | 0.503 | 0.070         | 2.941            | 0.976   | 1.279                | 0.134                 |
|                                       | 0.5   | -0.053 | 0.391 | 0.050  | 0.559 | 0.089         | 4.125            | 0.985   | 1.371                | 0.365                 |
|                                       | 0.975 | 0.830  | 0.437 | 0.102  | 0.616 | 0.110         | 5.900            | 0.991   | 1.452                | 0.906                 |
| Southeast Asia quantiles              | 0.025 | -0.162 | 0.287 | 0.033  | 0.571 | 0.086         | 2.596            | 0.962   | 4.171                | 0.646                 |
|                                       | 0.5   | 0.573  | 0.311 | 0.078  | 0.612 | 0.104         | 3.764            | 0.972   | 4.523                | 1.306                 |
|                                       | 0.975 | 1.308  | 0.334 | 0.123  | 0.652 | 0.128         | 5.345            | 0.979   | 4.874                | 2.463                 |
| Oceania quantiles                     | 0.025 | -0.162 | 0.287 | 0.033  | 0.571 | 0.086         | 2.596            | 0.962   | 4.171                | 0.646                 |
|                                       | 0.5   | 0.573  | 0.311 | 0.078  | 0.612 | 0.104         | 3.764            | 0.972   | 4.523                | 1.306                 |
|                                       | 0.975 | 1.308  | 0.334 | 0.123  | 0.652 | 0.128         | 5.345            | 0.979   | 4.874                | 2.463                 |
| Andean South America quantiles        | 0.025 | -0.563 | 0.978 | -0.267 | 0.221 | 0.206         | 2.089            | 0.014   | 84.569               | 1099.152              |
|                                       | 0.5   | -0.048 | 0.996 | -0.244 | 0.248 | 0.239         | 2.695            | 0.481   | 98.598               | 11896.816             |
|                                       | 0.975 | 0.467  | 1.014 | -0.221 | 0.276 | 0.287         | 3.546            | 0.844   | 115.700              | 60201.968             |
| Tropical South America quantiles      | 0.025 | -0.896 | 0.176 | -0.035 | 0.649 | 0.045         | 1.456            | 0.884   | 1218.805             | 0.052                 |
|                                       | 0.5   | 0.151  | 0.222 | 0.044  | 0.734 | 0.067         | 1.980            | 0.939   | 13600.000            | 0.207                 |
|                                       | 0.975 | 1.200  | 0.268 | 0.123  | 0.819 | 0.088         | 2.780            | 0.965   | 68500.000            | 0.536                 |
|                                       | 0.025 | -0.519 | 0.741 | -0.012 | 0.125 | 0.064         | 2.667            | 0.938   | 3.923                | 0.690                 |

|                                         |       | int   | gam   | gbm   | lasso | Nominal Range | Nominal Variance | AR1 rho | Precision for IID.ID | Precision for CTRY.ID |
|-----------------------------------------|-------|-------|-------|-------|-------|---------------|------------------|---------|----------------------|-----------------------|
| Central America and Caribbean quantiles | 0.5   | 0.068 | 0.778 | 0.039 | 0.183 | 0.071         | 3.225            | 0.949   | 4.209                | 2.494                 |
|                                         | 0.975 | 0.654 | 0.816 | 0.089 | 0.241 | 0.080         | 4.038            | 0.960   | 4.489                | 8.752                 |

**Supplementary Table 21. Mean years, men ages 15–49 fitted parameters**

Lower, median, and upper quantiles (0.025%, 0.50%, 0.975%) are displayed for the main parameters by region. The fixed effects covariates corresponding to the predicted ensemble rasters are shown in the first four columns, while fitted values for the spatiotemporal field hyperparameters and the precisions (inverse variance) for our random effects are shown in the last five columns.

|                                       |       | int    | gam   | gbm    | lasso | Nominal Range | Nominal Variance | AR1 rho | Precision for IID.ID | Precision for CTRY.ID |
|---------------------------------------|-------|--------|-------|--------|-------|---------------|------------------|---------|----------------------|-----------------------|
| Central sub-Saharan Africa quantiles  | 0.025 | -0.838 | 0.421 | 0.069  | 0.308 | 0.060         | 1.121            | 0.962   | 5.386                | 0.577                 |
|                                       | 0.5   | -0.265 | 0.476 | 0.149  | 0.375 | 0.077         | 1.627            | 0.976   | 6.196                | 1.369                 |
|                                       | 0.975 | 0.307  | 0.530 | 0.229  | 0.442 | 0.098         | 2.355            | 0.985   | 7.058                | 3.117                 |
| Eastern sub-Saharan Africa quantiles  | 0.025 | -0.794 | 0.728 | 0.011  | 0.119 | 0.032         | 1.110            | 0.988   | 4.382                | 0.676                 |
|                                       | 0.5   | -0.232 | 0.765 | 0.066  | 0.169 | 0.038         | 1.369            | 0.992   | 5.214                | 2.183                 |
|                                       | 0.975 | 0.330  | 0.803 | 0.121  | 0.219 | 0.049         | 1.755            | 0.994   | 5.714                | 7.074                 |
| Northern Africa quantiles             | 0.025 | -0.995 | 0.348 | -0.010 | 0.530 | 0.052         | 1.578            | 0.924   | 6.712                | 0.473                 |
|                                       | 0.5   | -0.375 | 0.376 | 0.044  | 0.580 | 0.058         | 1.871            | 0.935   | 8.027                | 1.631                 |
|                                       | 0.975 | 0.245  | 0.403 | 0.097  | 0.631 | 0.067         | 2.297            | 0.947   | 8.852                | 4.694                 |
| Southern sub-Saharan Africa quantiles | 0.025 | -1.636 | 0.986 | -0.470 | 0.360 | 0.098         | 3.060            | 0.980   | 6.504                | 0.231                 |
|                                       | 0.5   | -0.578 | 1.026 | -0.431 | 0.405 | 0.121         | 4.616            | 0.987   | 6.957                | 0.605                 |
|                                       | 0.975 | 0.480  | 1.065 | -0.391 | 0.451 | 0.151         | 7.422            | 0.992   | 7.469                | 1.452                 |
| Western sub-Saharan Africa quantiles  | 0.025 | -1.253 | 0.624 | -0.055 | 0.272 | 0.027         | 0.665            | 0.923   | 15.851               | 0.180                 |
|                                       | 0.5   | -0.482 | 0.671 | -0.001 | 0.329 | 0.034         | 0.885            | 0.943   | 21.750               | 0.751                 |
|                                       | 0.975 | 0.289  | 0.718 | 0.054  | 0.386 | 0.040         | 1.105            | 0.959   | 30.816               | 2.595                 |
| Middle East quantiles                 | 0.025 | -1.375 | 0.535 | 0.018  | 0.311 | 0.208         | 44.042           | 0.999   | 3.226                | 0.501                 |
|                                       | 0.5   | -0.005 | 0.571 | 0.072  | 0.357 | 0.273         | 75.594           | 1.000   | 3.377                | 1.597                 |
|                                       | 0.975 | 1.364  | 0.606 | 0.126  | 0.404 | 0.373         | 143.783          | 1.000   | 3.541                | 4.663                 |
| Central Asia quantiles                | 0.025 | -0.559 | 0.536 | 0.067  | 0.225 | 0.040         | 1.072            | 0.948   | 3.149                | 0.222                 |
|                                       | 0.5   | 0.205  | 0.582 | 0.131  | 0.287 | 0.049         | 1.447            | 0.965   | 3.399                | 0.607                 |
|                                       | 0.975 | 0.968  | 0.628 | 0.195  | 0.349 | 0.063         | 2.087            | 0.980   | 3.633                | 1.511                 |
| South Asia quantiles                  | 0.025 | -1.255 | 0.235 | 0.202  | 0.471 | 0.168         | 19.088           | 0.994   | 4.559                | 0.321                 |
|                                       | 0.5   | 0.056  | 0.257 | 0.240  | 0.503 | 0.211         | 30.257           | 0.996   | 4.806                | 0.628                 |
|                                       | 0.975 | 1.367  | 0.280 | 0.278  | 0.534 | 0.258         | 45.091           | 0.997   | 5.198                | 1.165                 |
|                                       | 0.025 | -1.135 | 0.227 | 0.012  | 0.575 | 0.080         | 2.959            | 0.979   | 1.851                | 0.217                 |
|                                       | 0.5   | -0.243 | 0.283 | 0.074  | 0.643 | 0.111         | 5.022            | 0.988   | 2.015                | 0.689                 |

|                                         |       | int    | gam   | gbm    | lasso | Nominal Range | Nominal Variance | AR1 rho | Precision for IID.ID | Precision for CTRY.ID |
|-----------------------------------------|-------|--------|-------|--------|-------|---------------|------------------|---------|----------------------|-----------------------|
| East Asia quantiles                     | 0.975 | 0.648  | 0.339 | 0.136  | 0.711 | 0.149         | 8.369            | 0.993   | 2.152                | 1.827                 |
| Southeast Asia quantiles                | 0.025 | -0.188 | 0.281 | 0.056  | 0.538 | 0.077         | 2.152            | 0.963   | 3.458                | 0.414                 |
|                                         | 0.5   | 0.584  | 0.304 | 0.109  | 0.587 | 0.099         | 3.641            | 0.979   | 3.678                | 0.799                 |
|                                         | 0.975 | 1.356  | 0.328 | 0.162  | 0.635 | 0.124         | 5.399            | 0.985   | 3.965                | 1.491                 |
| Oceania quantiles                       | 0.025 | -0.188 | 0.281 | 0.056  | 0.538 | 0.077         | 2.152            | 0.963   | 3.458                | 0.414                 |
|                                         | 0.5   | 0.584  | 0.304 | 0.109  | 0.587 | 0.099         | 3.641            | 0.979   | 3.678                | 0.799                 |
|                                         | 0.975 | 1.356  | 0.328 | 0.162  | 0.635 | 0.124         | 5.399            | 0.985   | 3.965                | 1.491                 |
| Andean South America quantiles          | 0.025 | -0.090 | 0.417 | -0.654 | 1.105 | 0.115         | 0.705            | 0.631   | 11.315               | 1356.584              |
|                                         | 0.5   | 0.281  | 0.444 | -0.603 | 1.159 | 0.143         | 1.006            | 0.824   | 12.116               | 12965.278             |
|                                         | 0.975 | 0.652  | 0.470 | -0.552 | 1.213 | 0.181         | 1.473            | 0.915   | 13.150               | 69925.585             |
| Tropical South America quantiles        | 0.025 | -1.144 | 0.167 | -0.045 | 0.643 | 0.052         | 0.873            | 0.835   | 6.924                | 0.083                 |
|                                         | 0.5   | -0.098 | 0.220 | 0.045  | 0.734 | 0.070         | 1.385            | 0.914   | 13.960               | 0.237                 |
|                                         | 0.975 | 0.948  | 0.274 | 0.135  | 0.826 | 0.109         | 2.117            | 0.963   | 41.711               | 0.645                 |
| Central America and Caribbean quantiles | 0.025 | -0.562 | 0.637 | -0.187 | 0.380 | 0.068         | 2.031            | 0.936   | 3.896                | 0.382                 |
|                                         | 0.5   | 0.052  | 0.676 | -0.125 | 0.448 | 0.076         | 2.438            | 0.947   | 4.142                | 1.240                 |
|                                         | 0.975 | 0.665  | 0.716 | -0.062 | 0.516 | 0.090         | 3.103            | 0.960   | 4.471                | 3.019                 |

**Supplementary Table 22. Mean years, women ages 20–24 fitted parameters**

Lower, median, and upper quantiles (0.025%, 0.50%, 0.975%) are displayed for the main parameters by region. The fixed effects covariates corresponding to the predicted ensemble rasters are shown in the first four columns, while fitted values for the spatiotemporal field hyperparameters and the precisions (inverse variance) for our random effects are shown in the last five columns.

|                                      |       | int    | gam   | gbm    | lasso | Nominal Range | Nominal Variance | AR1 rho | Precision for IID.ID | Precision for CTRY.ID |
|--------------------------------------|-------|--------|-------|--------|-------|---------------|------------------|---------|----------------------|-----------------------|
| Central sub-Saharan Africa quantiles | 0.025 | -0.769 | 0.303 | 0.121  | 0.360 | 0.060         | 1.680            | 0.954   | 3.834                | 0.533                 |
|                                      | 0.5   | -0.155 | 0.355 | 0.210  | 0.435 | 0.076         | 2.377            | 0.970   | 4.465                | 1.412                 |
|                                      | 0.975 | 0.459  | 0.407 | 0.298  | 0.510 | 0.097         | 3.411            | 0.981   | 5.154                | 3.361                 |
| Eastern sub-Saharan Africa quantiles | 0.025 | -0.672 | 0.593 | -0.058 | 0.316 | 0.032         | 1.574            | 0.979   | 5.123                | 0.439                 |
|                                      | 0.5   | -0.045 | 0.628 | -0.001 | 0.373 | 0.040         | 2.209            | 0.986   | 5.623                | 1.745                 |
|                                      | 0.975 | 0.582  | 0.664 | 0.056  | 0.429 | 0.047         | 2.830            | 0.990   | 6.117                | 6.040                 |
| Northern Africa quantiles            | 0.025 | -0.640 | 0.305 | 0.004  | 0.550 | 0.044         | 2.631            | 0.894   | 4.383                | 0.487                 |
|                                      | 0.5   | -0.063 | 0.335 | 0.061  | 0.604 | 0.049         | 3.092            | 0.911   | 4.772                | 2.659                 |
|                                      | 0.975 | 0.514  | 0.366 | 0.118  | 0.657 | 0.056         | 3.740            | 0.928   | 5.274                | 10.781                |
| Southern sub-Saharan                 | 0.025 | -1.776 | 0.922 | -0.355 | 0.280 | 0.077         | 1.704            | 0.975   | 10.038               | 0.093                 |
|                                      | 0.5   | -0.775 | 0.966 | -0.307 | 0.341 | 0.092         | 2.391            | 0.982   | 10.690               | 0.271                 |
|                                      | 0.975 | 0.226  | 1.010 | -0.260 | 0.402 | 0.108         | 3.415            | 0.988   | 11.528               | 0.615                 |

|                                                |       | int    | gam   | gbm    | lasso | Nominal Range | Nominal Variance | AR1 rho | Precision for IID.ID | Precision for CTRY.ID |
|------------------------------------------------|-------|--------|-------|--------|-------|---------------|------------------|---------|----------------------|-----------------------|
| <b>Africa quantiles</b>                        |       |        |       |        |       |               |                  |         |                      |                       |
| <b>Western sub-Saharan quantiles</b>           | 0.025 | -1.889 | 0.400 | -0.082 | 0.517 | 0.031         | 1.444            | 0.950   | 20.779               | 0.057                 |
|                                                | 0.5   | -0.794 | 0.445 | -0.026 | 0.581 | 0.036         | 1.764            | 0.967   | 38.708               | 0.188                 |
|                                                | 0.975 | 0.299  | 0.490 | 0.030  | 0.645 | 0.042         | 2.263            | 0.977   | 110.729              | 0.547                 |
| <b>Middle East quantiles</b>                   | 0.025 | -1.228 | 0.405 | 0.089  | 0.355 | 0.081         | 8.324            | 0.993   | 2.941                | 0.279                 |
|                                                | 0.5   | -0.159 | 0.445 | 0.148  | 0.407 | 0.098         | 12.102           | 0.995   | 3.093                | 0.916                 |
|                                                | 0.975 | 0.909  | 0.484 | 0.207  | 0.460 | 0.126         | 19.678           | 0.997   | 3.219                | 2.319                 |
| <b>Central Asia quantiles</b>                  | 0.025 | -0.663 | 0.619 | 0.102  | 0.065 | 0.034         | 1.450            | 0.898   | 1.891                | 0.129                 |
|                                                | 0.5   | 0.237  | 0.665 | 0.184  | 0.151 | 0.044         | 2.028            | 0.936   | 2.034                | 0.342                 |
|                                                | 0.975 | 1.137  | 0.711 | 0.266  | 0.237 | 0.054         | 2.708            | 0.956   | 2.184                | 0.809                 |
| <b>South Asia quantiles</b>                    | 0.025 | -0.663 | 0.619 | 0.102  | 0.065 | 0.034         | 1.450            | 0.898   | 1.891                | 0.129                 |
|                                                | 0.5   | 0.237  | 0.665 | 0.184  | 0.151 | 0.044         | 2.028            | 0.936   | 2.034                | 0.342                 |
|                                                | 0.975 | 1.137  | 0.711 | 0.266  | 0.237 | 0.054         | 2.708            | 0.956   | 2.184                | 0.809                 |
| <b>East Asia quantiles</b>                     | 0.025 | -1.136 | 0.223 | -0.017 | 0.619 | 0.052         | 3.138            | 0.981   | 1.282                | 0.066                 |
|                                                | 0.5   | -0.109 | 0.276 | 0.039  | 0.685 | 0.073         | 4.479            | 0.988   | 1.390                | 0.159                 |
|                                                | 0.975 | 0.918  | 0.329 | 0.095  | 0.750 | 0.091         | 6.114            | 0.992   | 1.505                | 0.408                 |
| <b>Southeast Asia quantiles</b>                | 0.025 | -0.267 | 0.230 | 0.105  | 0.547 | 0.096         | 4.406            | 0.965   | 2.877                | 0.414                 |
|                                                | 0.5   | 0.654  | 0.254 | 0.154  | 0.592 | 0.118         | 6.574            | 0.975   | 3.152                | 0.829                 |
|                                                | 0.975 | 1.574  | 0.277 | 0.204  | 0.637 | 0.149         | 9.795            | 0.982   | 3.412                | 1.610                 |
| <b>Oceania quantiles</b>                       | 0.025 | -0.267 | 0.230 | 0.105  | 0.547 | 0.096         | 4.406            | 0.965   | 2.877                | 0.414                 |
|                                                | 0.5   | 0.654  | 0.254 | 0.154  | 0.592 | 0.118         | 6.574            | 0.975   | 3.152                | 0.829                 |
|                                                | 0.975 | 1.574  | 0.277 | 0.204  | 0.637 | 0.149         | 9.795            | 0.982   | 3.412                | 1.610                 |
| <b>Andean South America quantiles</b>          | 0.025 | -0.962 | 0.957 | -0.293 | 0.248 | 0.170         | 2.945            | 0.047   | 46.963               | 1209.715              |
|                                                | 0.5   | -0.405 | 0.982 | -0.265 | 0.283 | 0.199         | 3.761            | 0.383   | 54.302               | 14318.265             |
|                                                | 0.975 | 0.152  | 1.007 | -0.237 | 0.318 | 0.229         | 4.886            | 0.663   | 62.993               | 72811.134             |
| <b>Tropical South America quantiles</b>        | 0.025 | -0.952 | 0.214 | -0.045 | 0.553 | 0.052         | 1.477            | 0.896   | 1103.715             | 0.070                 |
|                                                | 0.5   | 0.102  | 0.267 | 0.067  | 0.666 | 0.065         | 1.940            | 0.939   | 11000.000            | 0.224                 |
|                                                | 0.975 | 1.160  | 0.319 | 0.179  | 0.780 | 0.081         | 2.710            | 0.970   | 63600.000            | 0.595                 |
| <b>Central America and Caribbean quantiles</b> | 0.025 | -0.673 | 0.727 | 0.011  | 0.079 | 0.053         | 2.520            | 0.926   | 4.390                | 0.807                 |
|                                                | 0.5   | -0.214 | 0.778 | 0.068  | 0.154 | 0.058         | 2.964            | 0.939   | 4.745                | 4.908                 |
|                                                | 0.975 | 0.245  | 0.829 | 0.126  | 0.229 | 0.065         | 3.601            | 0.952   | 5.099                | 21.510                |

**Supplementary Table 23. Mean years, men ages 20–24 fitted parameters**

Lower, median, and upper quantiles (0.025%, 0.50%, 0.975%) are displayed for the main parameters by region. The fixed effects covariates corresponding to the predicted ensemble rasters are shown in the first four columns, while fitted values for the spatiotemporal field hyperparameters and the precisions (inverse variance) for our random effects are shown in the last five columns.

|                                       |       | int    | gam   | gbm    | lasso | Nominal Range | Nominal Variance | AR1 rho | Precision for IID.ID | Precision for CTRY.ID |
|---------------------------------------|-------|--------|-------|--------|-------|---------------|------------------|---------|----------------------|-----------------------|
| Central sub-Saharan Africa quantiles  | 0.025 | -0.822 | 0.358 | 0.009  | 0.381 | 0.065         | 1.121            | 0.943   | 5.300                | 0.560                 |
|                                       | 0.5   | -0.261 | 0.420 | 0.110  | 0.469 | 0.081         | 1.533            | 0.965   | 6.259                | 1.367                 |
|                                       | 0.975 | 0.300  | 0.482 | 0.212  | 0.557 | 0.111         | 2.202            | 0.983   | 7.961                | 3.531                 |
| Eastern sub-Saharan Africa quantiles  | 0.025 | -0.808 | 0.726 | -0.096 | 0.211 | 0.041         | 1.252            | 0.982   | 5.750                | 0.368                 |
|                                       | 0.5   | -0.094 | 0.769 | -0.038 | 0.269 | 0.052         | 1.828            | 0.987   | 6.234                | 1.220                 |
|                                       | 0.975 | 0.620  | 0.812 | 0.019  | 0.328 | 0.064         | 2.473            | 0.990   | 6.806                | 4.022                 |
| Northern Africa quantiles             | 0.025 | -0.885 | 0.207 | 0.019  | 0.568 | 0.057         | 2.112            | 0.902   | 6.086                | 0.262                 |
|                                       | 0.5   | -0.153 | 0.244 | 0.105  | 0.651 | 0.064         | 2.522            | 0.917   | 6.667                | 0.957                 |
|                                       | 0.975 | 0.579  | 0.282 | 0.191  | 0.733 | 0.075         | 3.169            | 0.935   | 7.549                | 2.614                 |
| Southern sub-Saharan Africa quantiles | 0.025 | -1.567 | 0.941 | -0.357 | 0.291 | 0.068         | 1.471            | 0.977   | 10.107               | 0.187                 |
|                                       | 0.5   | -0.642 | 0.983 | -0.319 | 0.337 | 0.091         | 2.482            | 0.986   | 11.023               | 0.519                 |
|                                       | 0.975 | 0.283  | 1.024 | -0.282 | 0.382 | 0.117         | 4.005            | 0.992   | 12.331               | 1.188                 |
| Western sub-Saharan Africa quantiles  | 0.025 | -1.758 | 0.340 | -0.092 | 0.562 | 0.025         | 0.701            | 0.887   | 801.415              | 0.130                 |
|                                       | 0.5   | -0.867 | 0.391 | -0.027 | 0.636 | 0.044         | 0.990            | 0.934   | 10100.000            | 0.499                 |
|                                       | 0.975 | 0.023  | 0.443 | 0.038  | 0.710 | 0.058         | 1.270            | 0.955   | 59800.000            | 1.740                 |
| Middle East quantiles                 | 0.025 | -1.324 | 0.412 | 0.061  | 0.376 | 0.095         | 10.104           | 0.995   | 3.367                | 0.731                 |
|                                       | 0.5   | -0.160 | 0.453 | 0.119  | 0.428 | 0.118         | 15.763           | 0.997   | 3.651                | 2.351                 |
|                                       | 0.975 | 1.003  | 0.495 | 0.177  | 0.479 | 0.151         | 25.554           | 0.998   | 3.859                | 6.889                 |
| Central Asia quantiles                | 0.025 | -0.832 | 0.561 | 0.087  | 0.124 | 0.034         | 1.092            | 0.878   | 2.690                | 0.196                 |
|                                       | 0.5   | 0.022  | 0.614 | 0.170  | 0.216 | 0.056         | 1.874            | 0.937   | 2.895                | 0.510                 |
|                                       | 0.975 | 0.875  | 0.667 | 0.254  | 0.307 | 0.074         | 2.786            | 0.960   | 3.215                | 1.344                 |
| South Asia quantiles                  | 0.025 | -0.384 | 0.186 | 0.157  | 0.542 | 0.066         | 3.514            | 0.975   | 4.721                | 0.302                 |
|                                       | 0.5   | 0.343  | 0.214 | 0.205  | 0.582 | 0.079         | 4.798            | 0.982   | 5.073                | 0.578                 |
|                                       | 0.975 | 1.070  | 0.241 | 0.252  | 0.621 | 0.102         | 7.163            | 0.988   | 5.433                | 1.080                 |
| East Asia quantiles                   | 0.025 | -1.279 | 0.113 | -0.021 | 0.714 | 0.065         | 2.321            | 0.981   | 2.255                | 0.165                 |
|                                       | 0.5   | -0.461 | 0.169 | 0.046  | 0.785 | 0.078         | 3.194            | 0.989   | 2.448                | 0.437                 |
|                                       | 0.975 | 0.358  | 0.224 | 0.113  | 0.856 | 0.099         | 4.501            | 0.994   | 2.614                | 1.152                 |
| Southeast Asia quantiles              | 0.025 | -0.187 | 0.255 | 0.082  | 0.526 | 0.071         | 2.178            | 0.935   | 2.585                | 0.309                 |
|                                       | 0.5   | 0.618  | 0.280 | 0.140  | 0.580 | 0.095         | 4.204            | 0.968   | 2.959                | 0.636                 |
|                                       | 0.975 | 1.423  | 0.305 | 0.198  | 0.634 | 0.120         | 6.511            | 0.979   | 3.241                | 1.178                 |
| Oceania quantiles                     | 0.025 | -0.187 | 0.255 | 0.082  | 0.526 | 0.071         | 2.178            | 0.935   | 2.585                | 0.309                 |
|                                       | 0.5   | 0.618  | 0.280 | 0.140  | 0.580 | 0.095         | 4.204            | 0.968   | 2.959                | 0.636                 |
|                                       | 0.975 | 1.423  | 0.305 | 0.198  | 0.634 | 0.120         | 6.511            | 0.979   | 3.241                | 1.178                 |
| Andean South America quantiles        | 0.025 | -0.628 | 0.272 | -0.849 | 1.440 | 0.094         | 0.926            | 0.330   | 11.577               | 1597.043              |
|                                       | 0.5   | -0.270 | 0.304 | -0.794 | 1.489 | 0.119         | 1.325            | 0.688   | 12.476               | 15224.582             |
|                                       | 0.975 | 0.089  | 0.337 | -0.738 | 1.539 | 0.145         | 1.830            | 0.861   | 13.445               | 74726.256             |
| Tropical South America quantiles      | 0.025 | -1.130 | 0.147 | -0.005 | 0.542 | 0.056         | 0.938            | 0.495   | 1130.000             | 0.087                 |
|                                       | 0.5   | -0.110 | 0.209 | 0.121  | 0.670 | 0.077         | 1.710            | 0.893   | 11800.000            | 0.270                 |
|                                       | 0.975 | 0.906  | 0.271 | 0.246  | 0.798 | 0.119         | 2.690            | 0.959   | 64600.000            | 0.676                 |

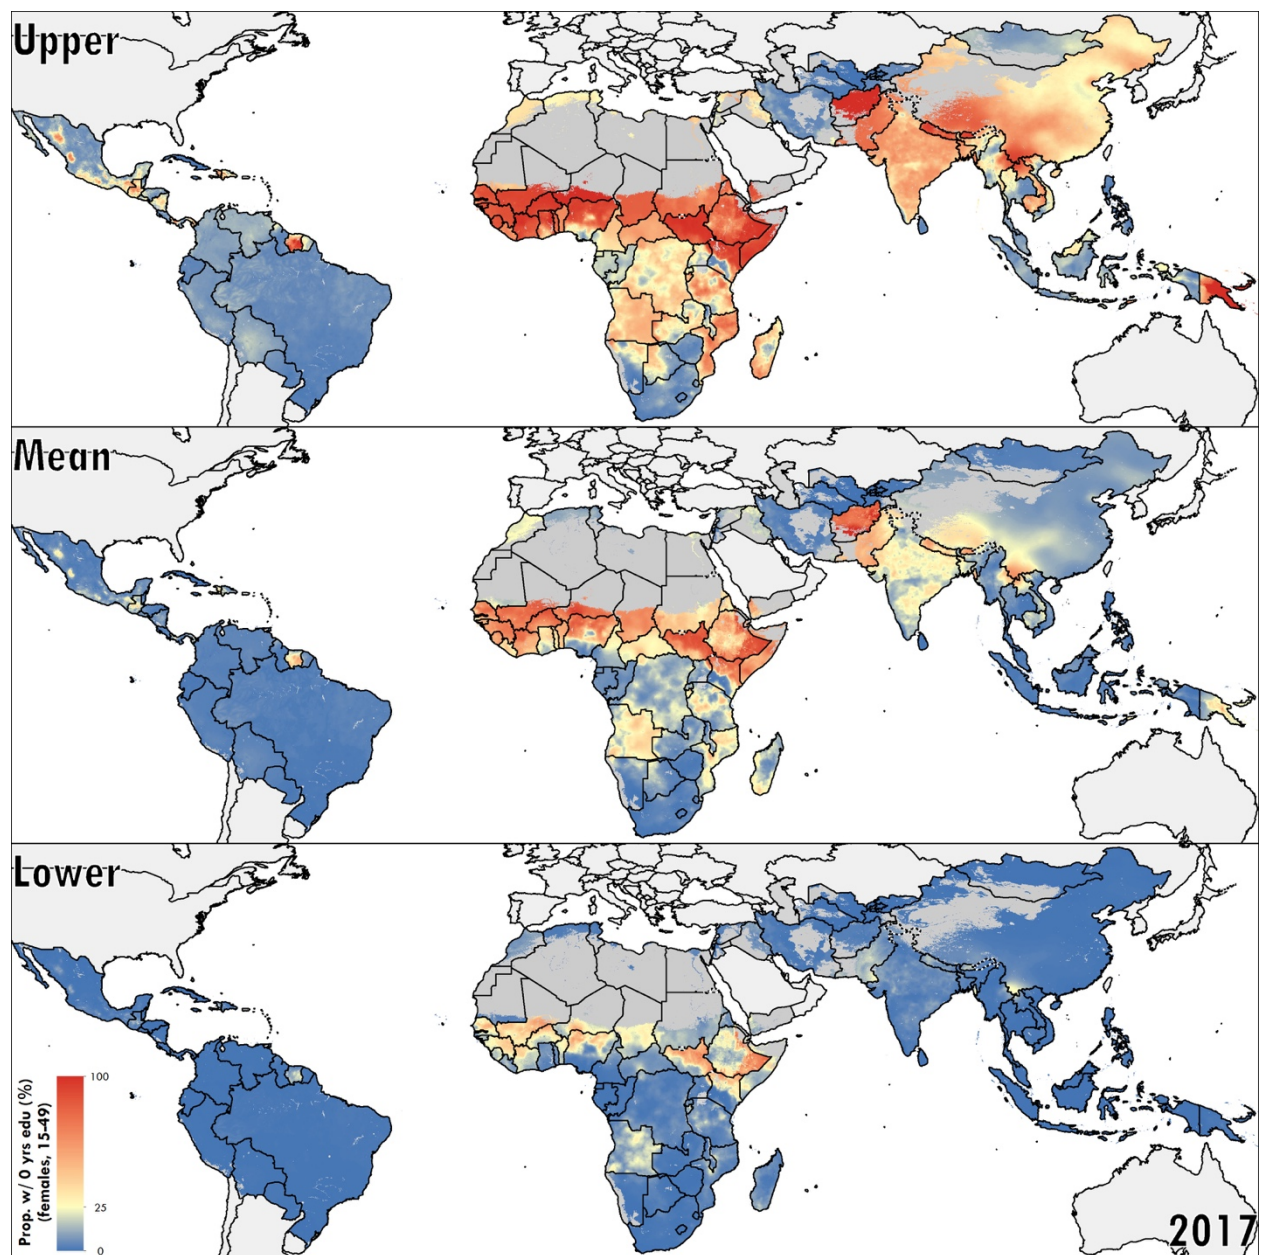

Supplementary Figure 8. Zero years, women ages 15–49 posterior means and 95% uncertainty interval, 2017

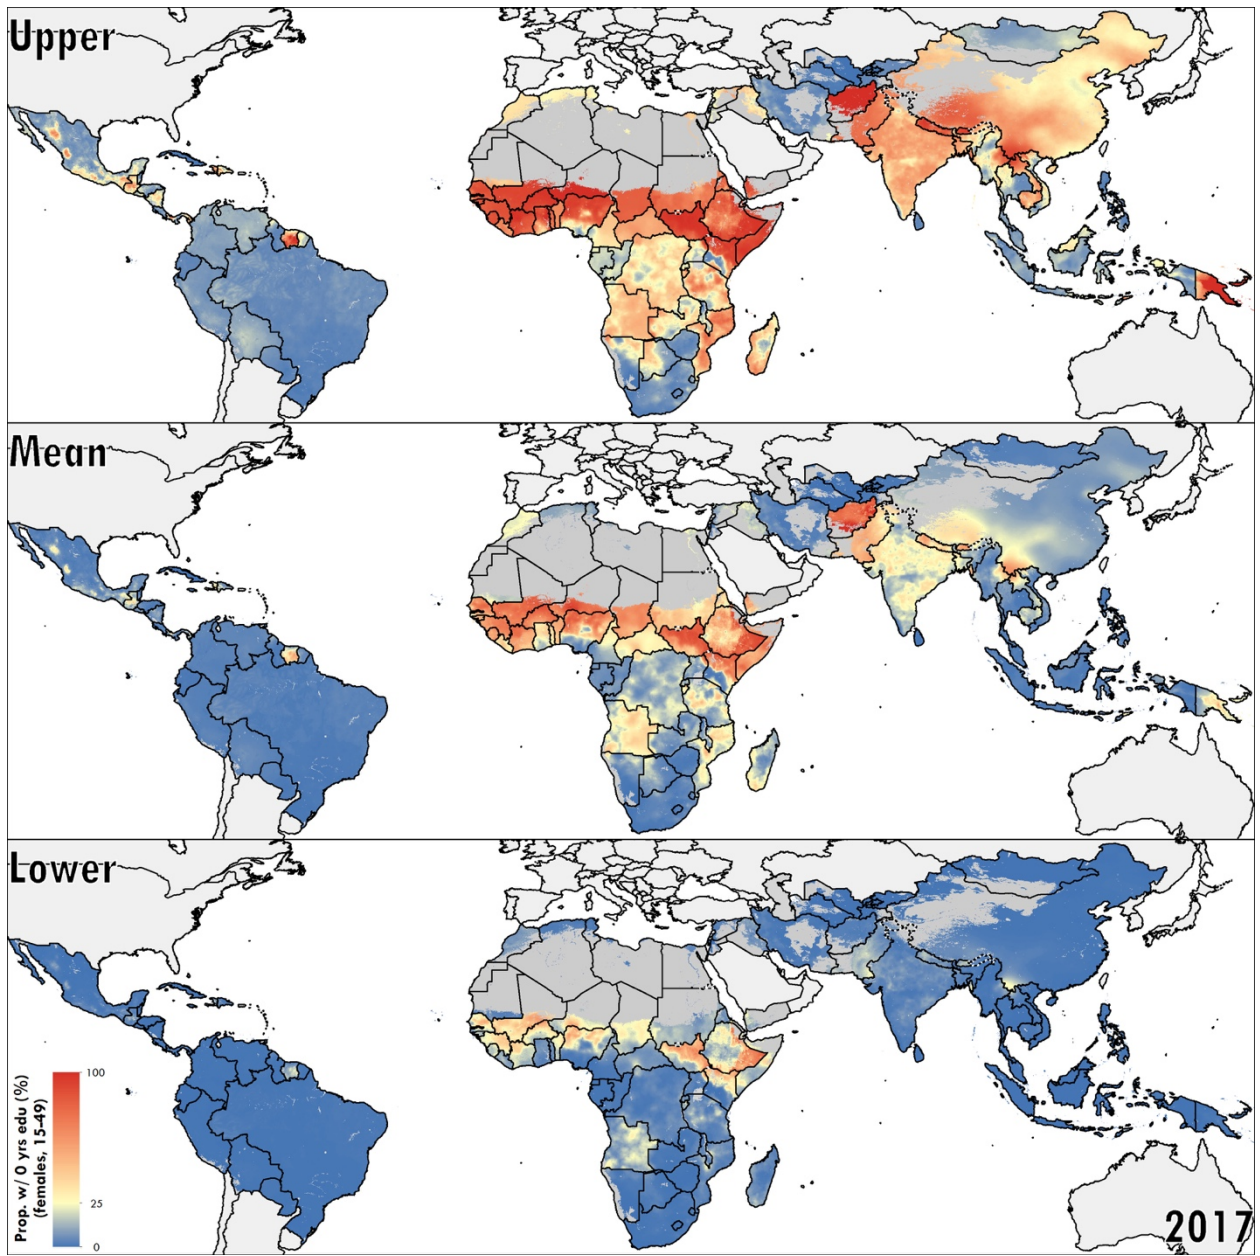

Supplementary Figure 9. Zero years, men ages 15–49 posterior means and 95% uncertainty interval, 2017



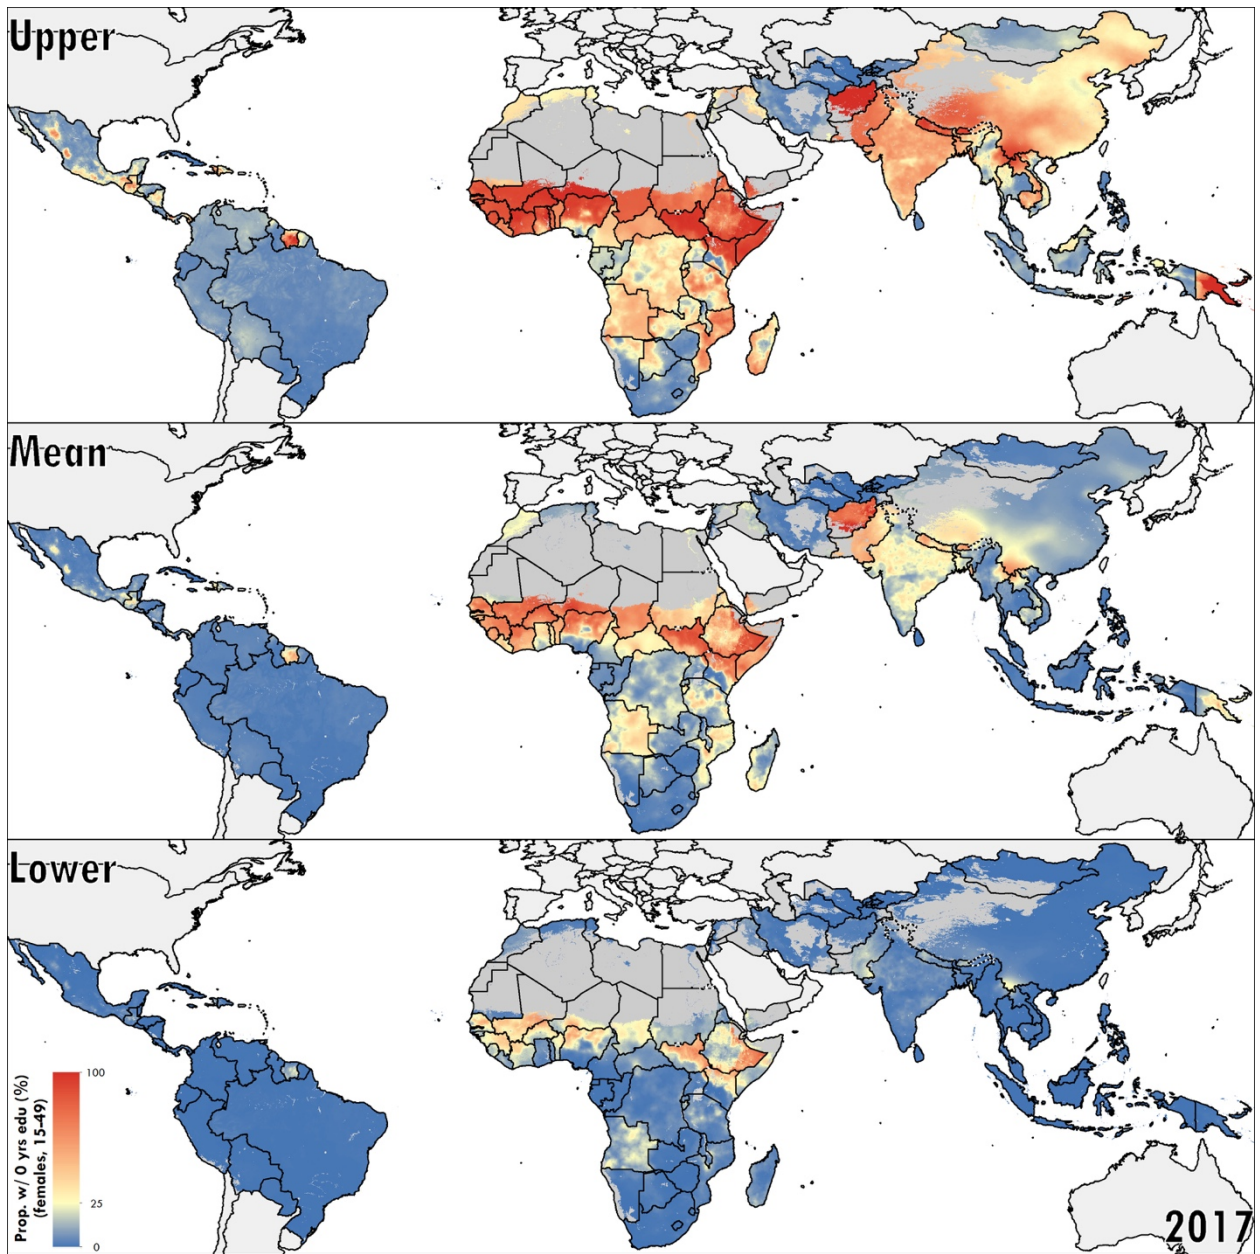

Supplementary Figure 10. Zero years, women ages 20–24 posterior means and 95% uncertainty interval, 2017



Supplementary Figure 11. Zero years, men ages 20–24 posterior means and 95% uncertainty interval, 2017

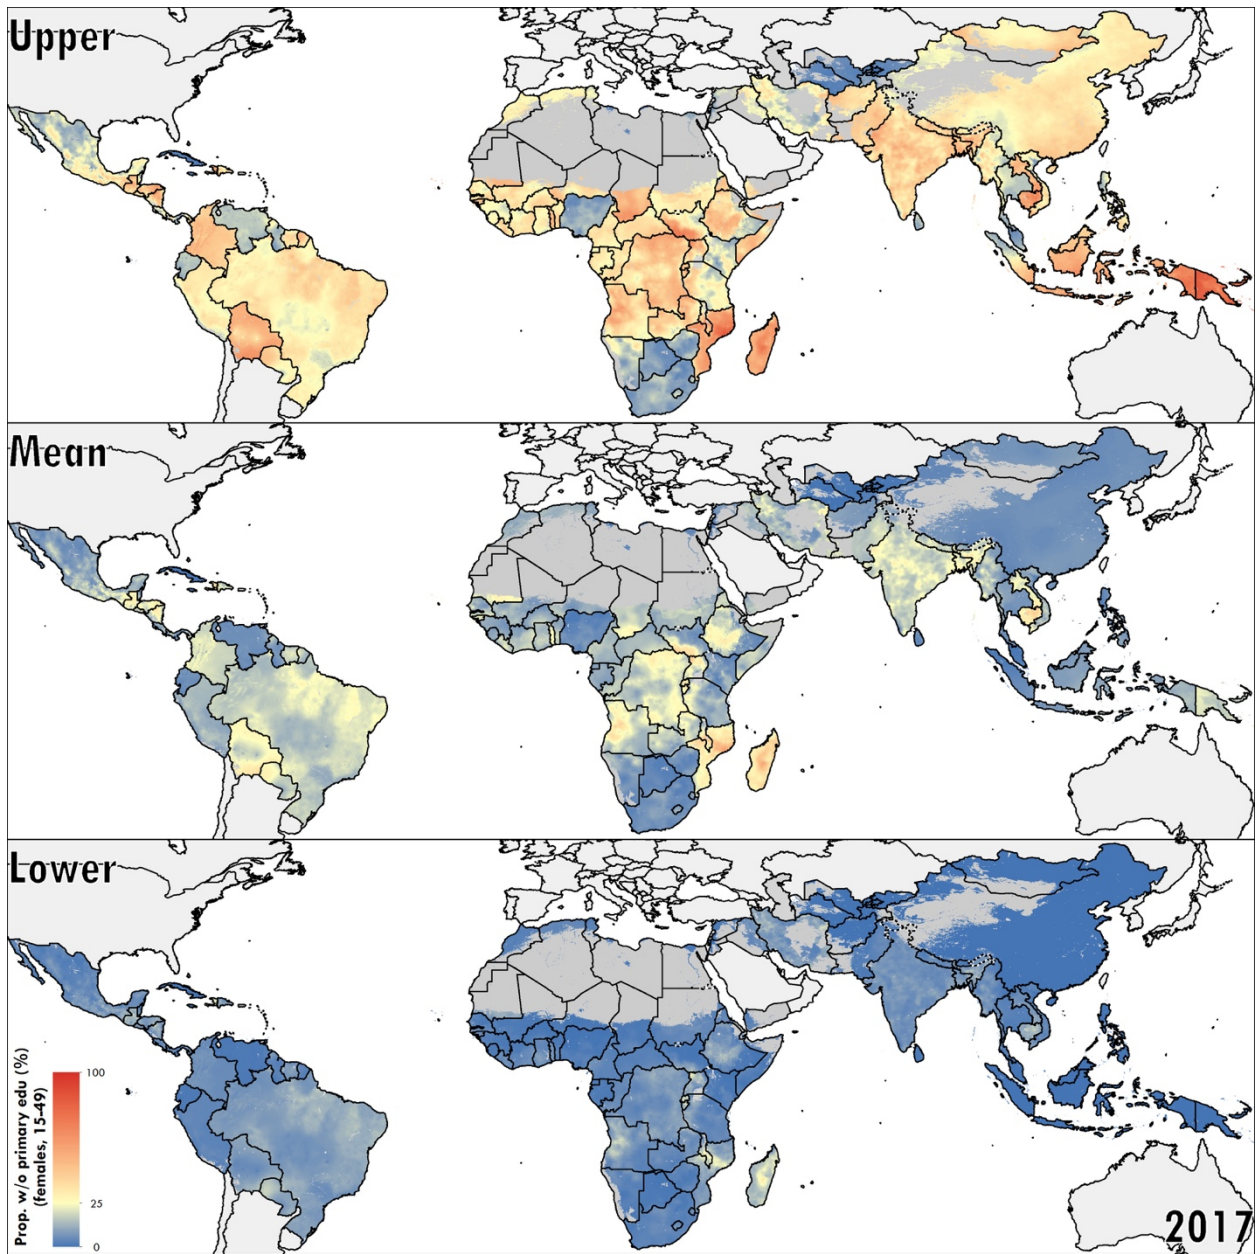

Supplementary Figure 12. 1–5 years, women ages 15–49 posterior means and 95% uncertainty interval, 2017

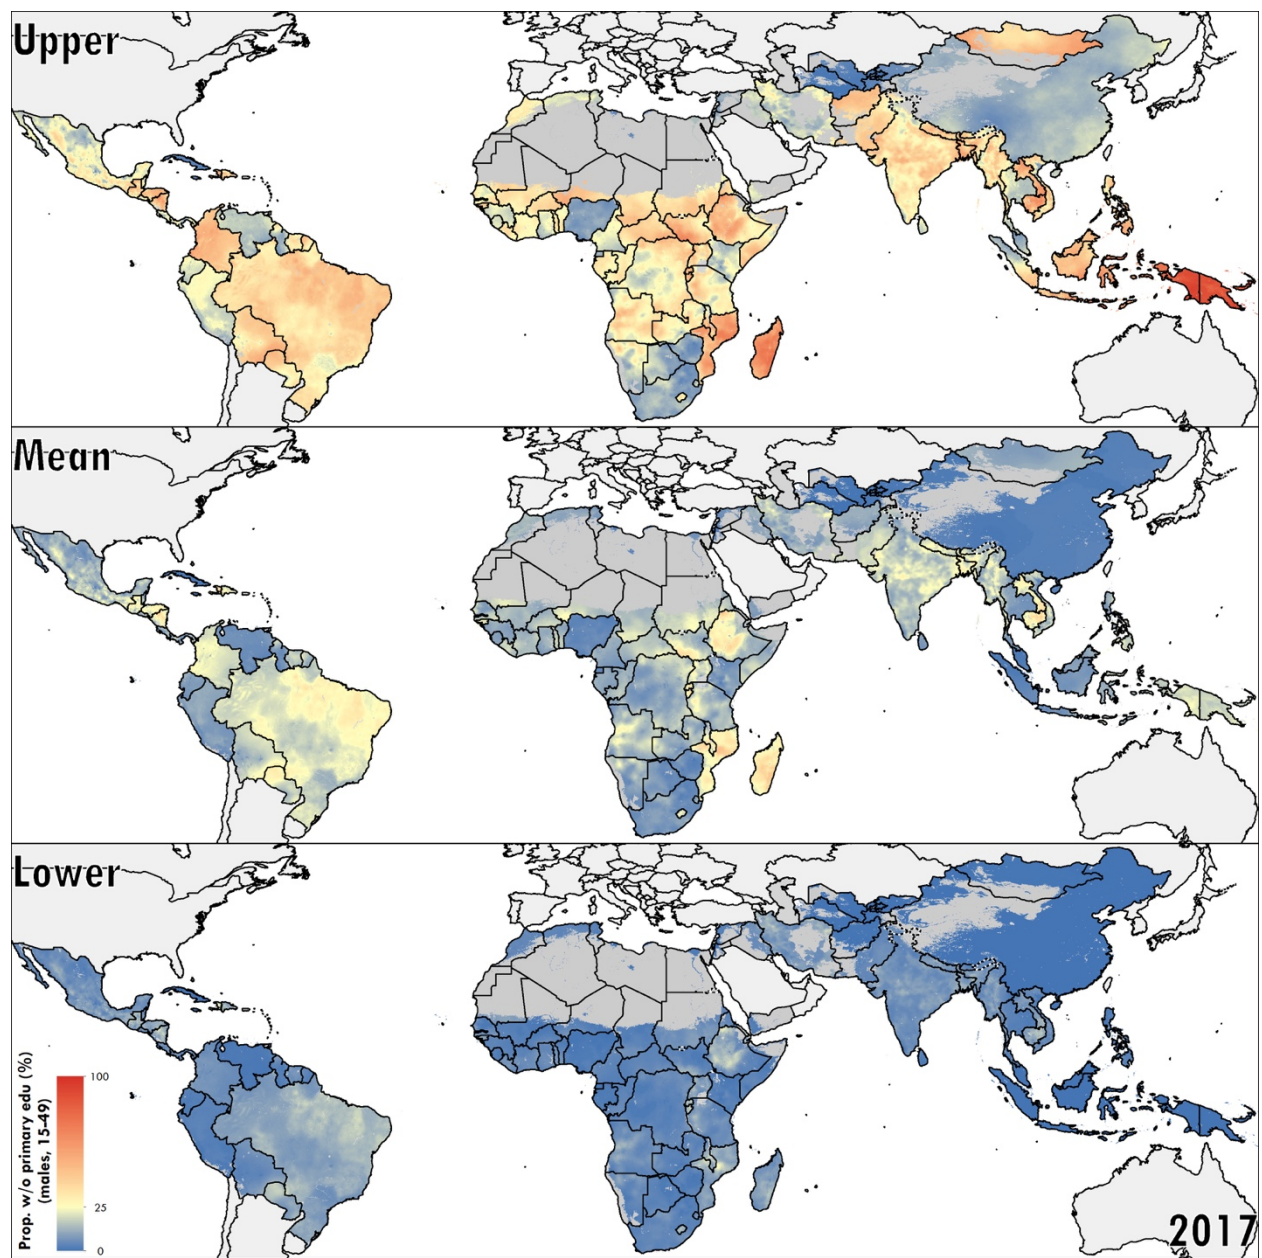

Supplementary Figure 13. 1–5 years, men ages 15–49 posterior means and 95% uncertainty interval, 2017

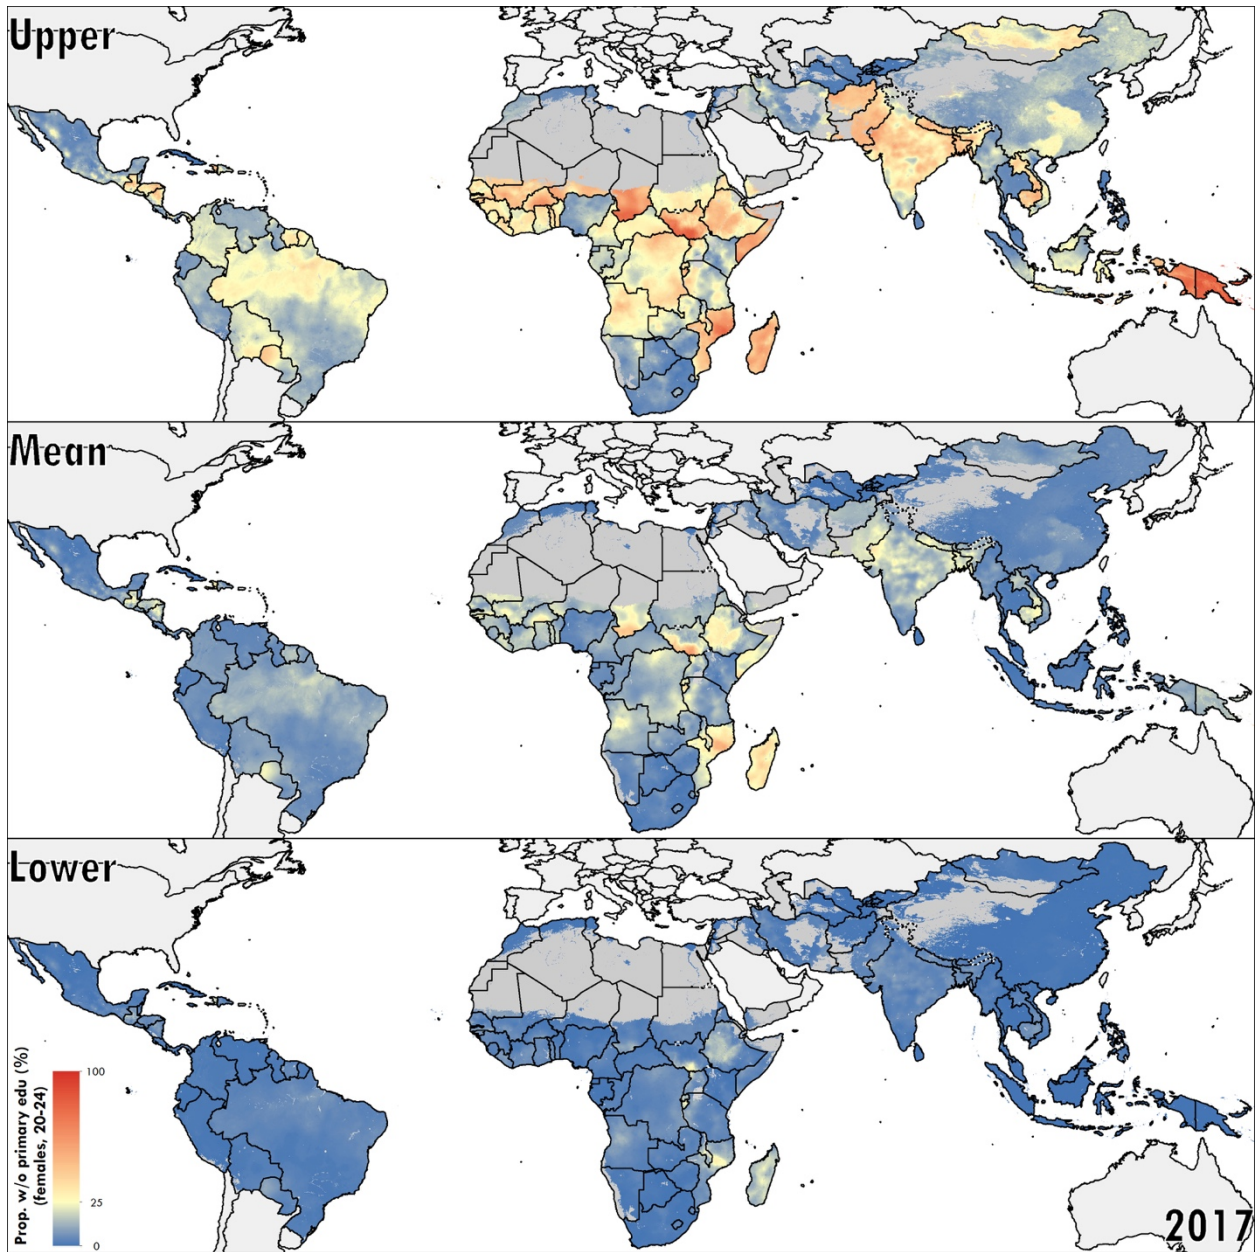

**Supplementary Figure 14. 1–5 years, women ages 20–24 posterior means and 95% uncertainty interval, 2017**

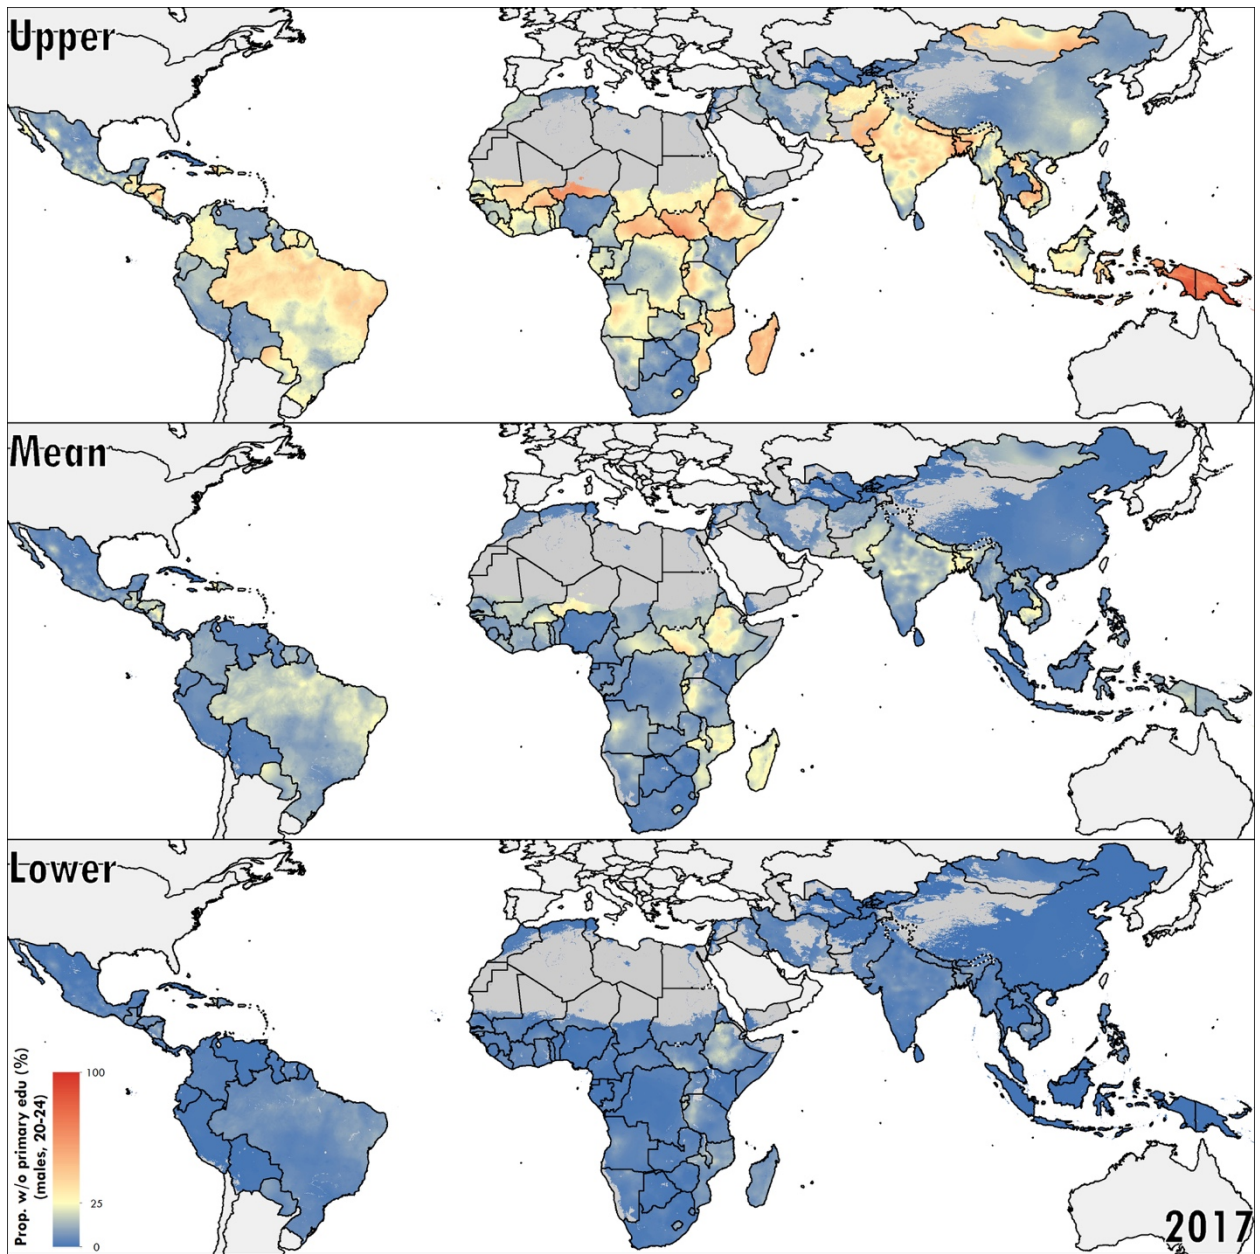

Supplementary Figure 15. 1–5 years, men ages 20–24 posterior means and 95% uncertainty interval, 2017



Supplementary Figure 16. 6–11 years, women ages 15–49 posterior means and 95% uncertainty interval, 2017



Supplementary Figure 17. 6–11 years, men ages 15–49 posterior means and 95% uncertainty interval, 2017





Supplementary Figure 18. 6–11 years, women ages 20–24 posterior means and 95% uncertainty interval, 2017

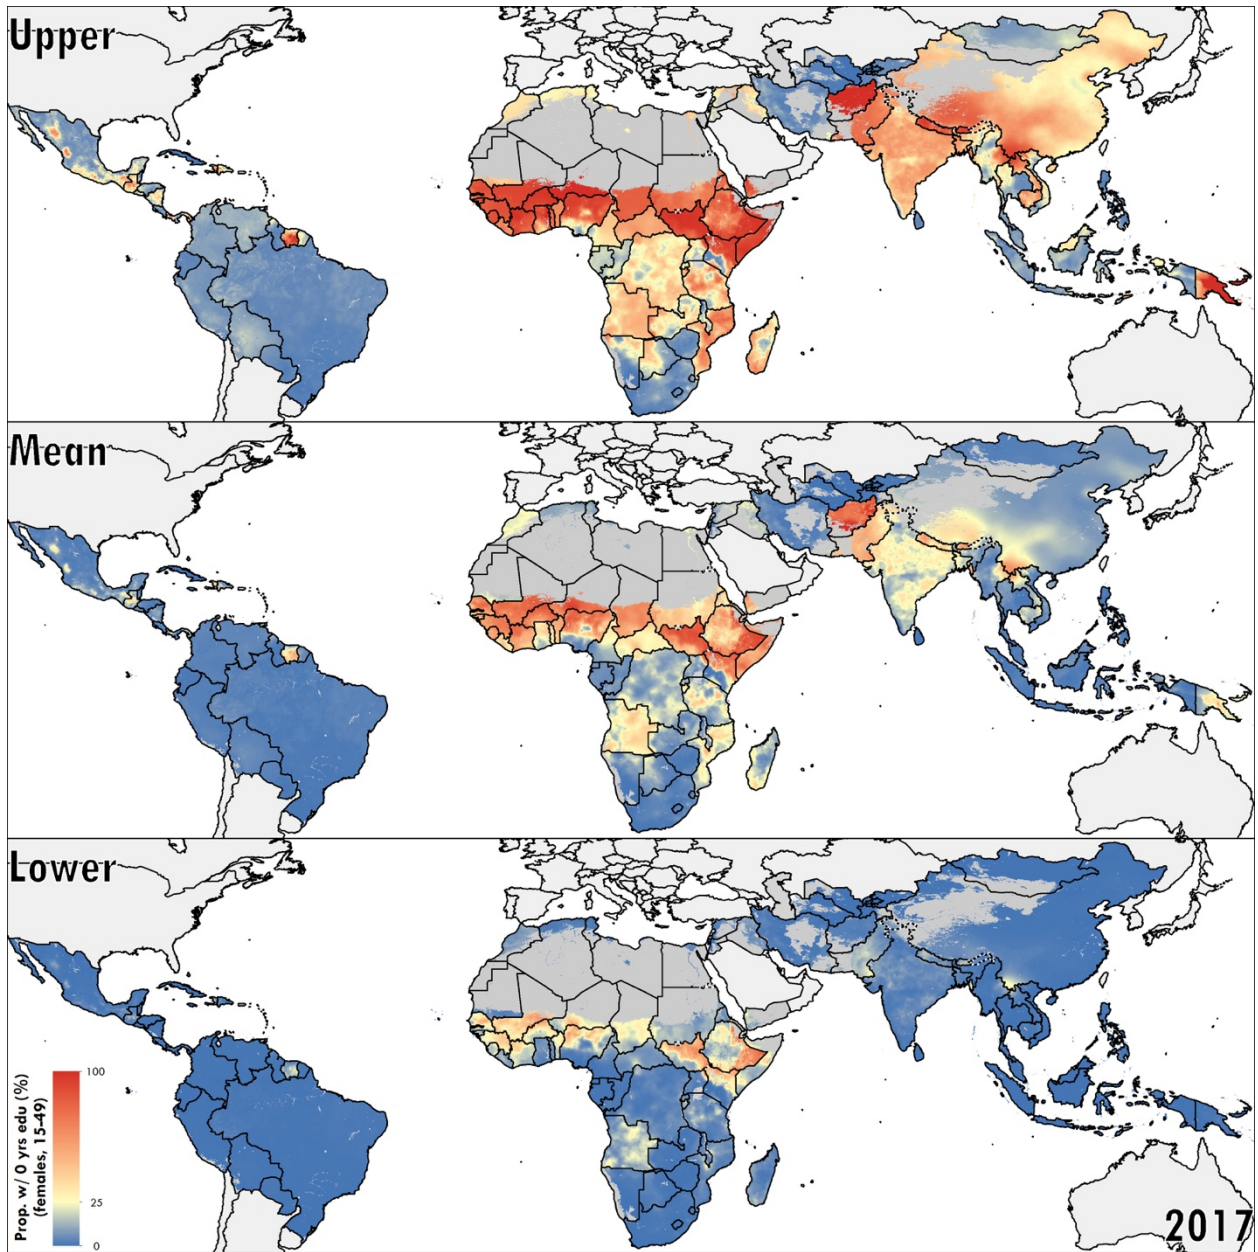

Supplementary Figure 19. 6–11 years, men ages 20–24 posterior means and 95% uncertainty interval, 2017

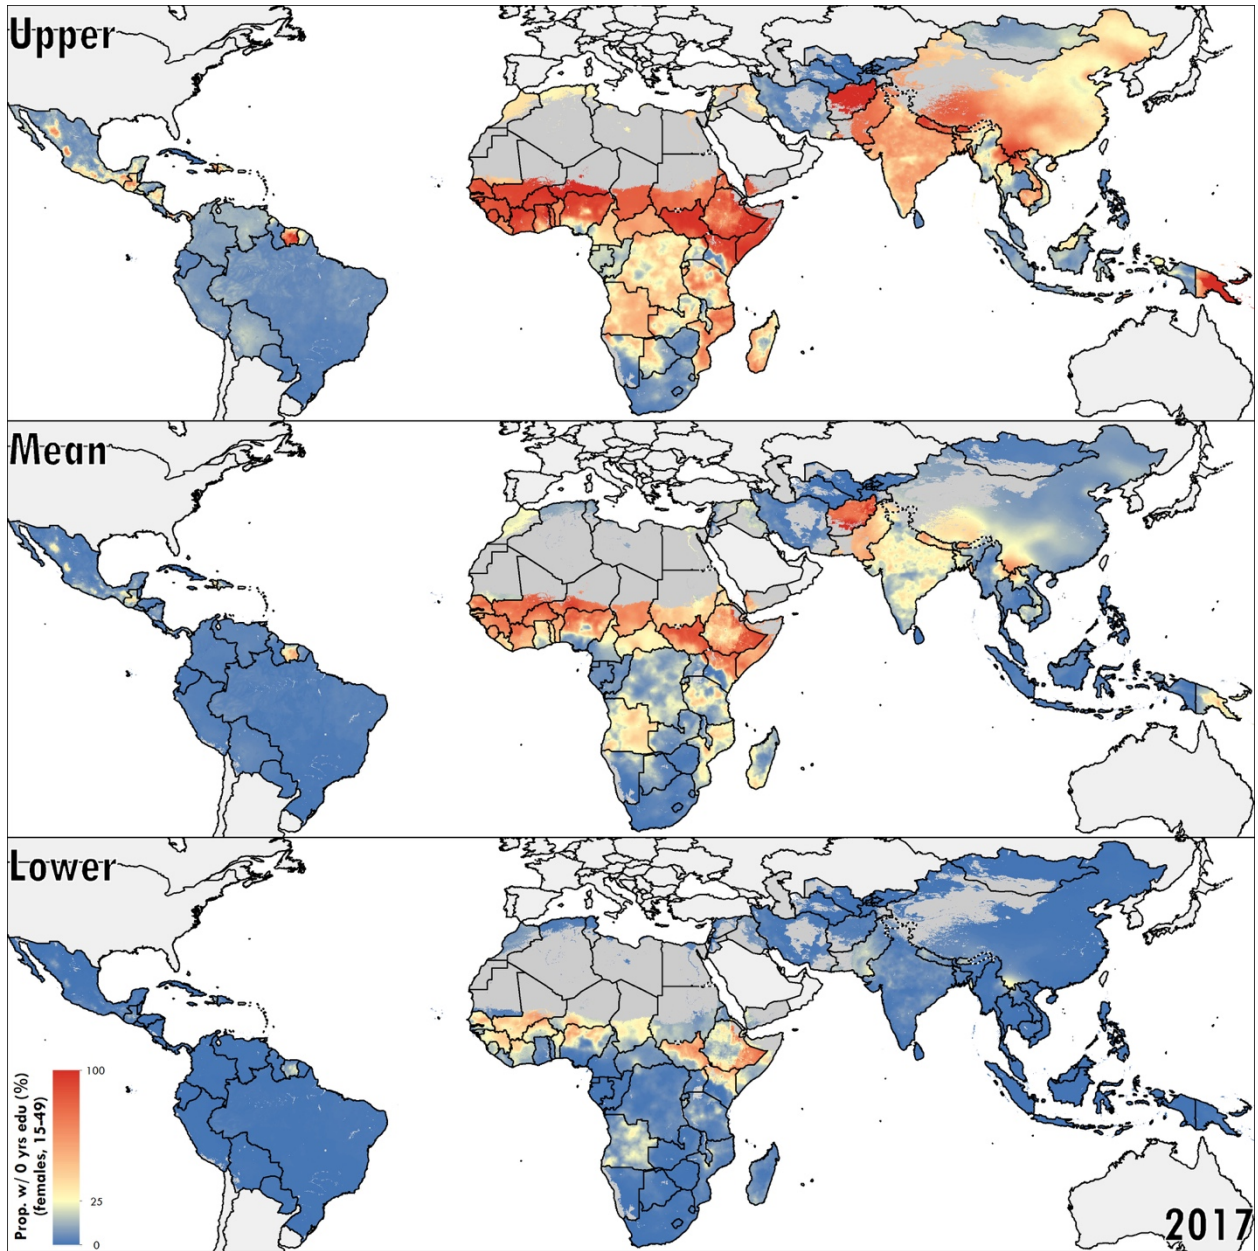

Supplementary Figure 20. 12+ years, women ages 15–49 posterior means and 95% uncertainty interval, 2017

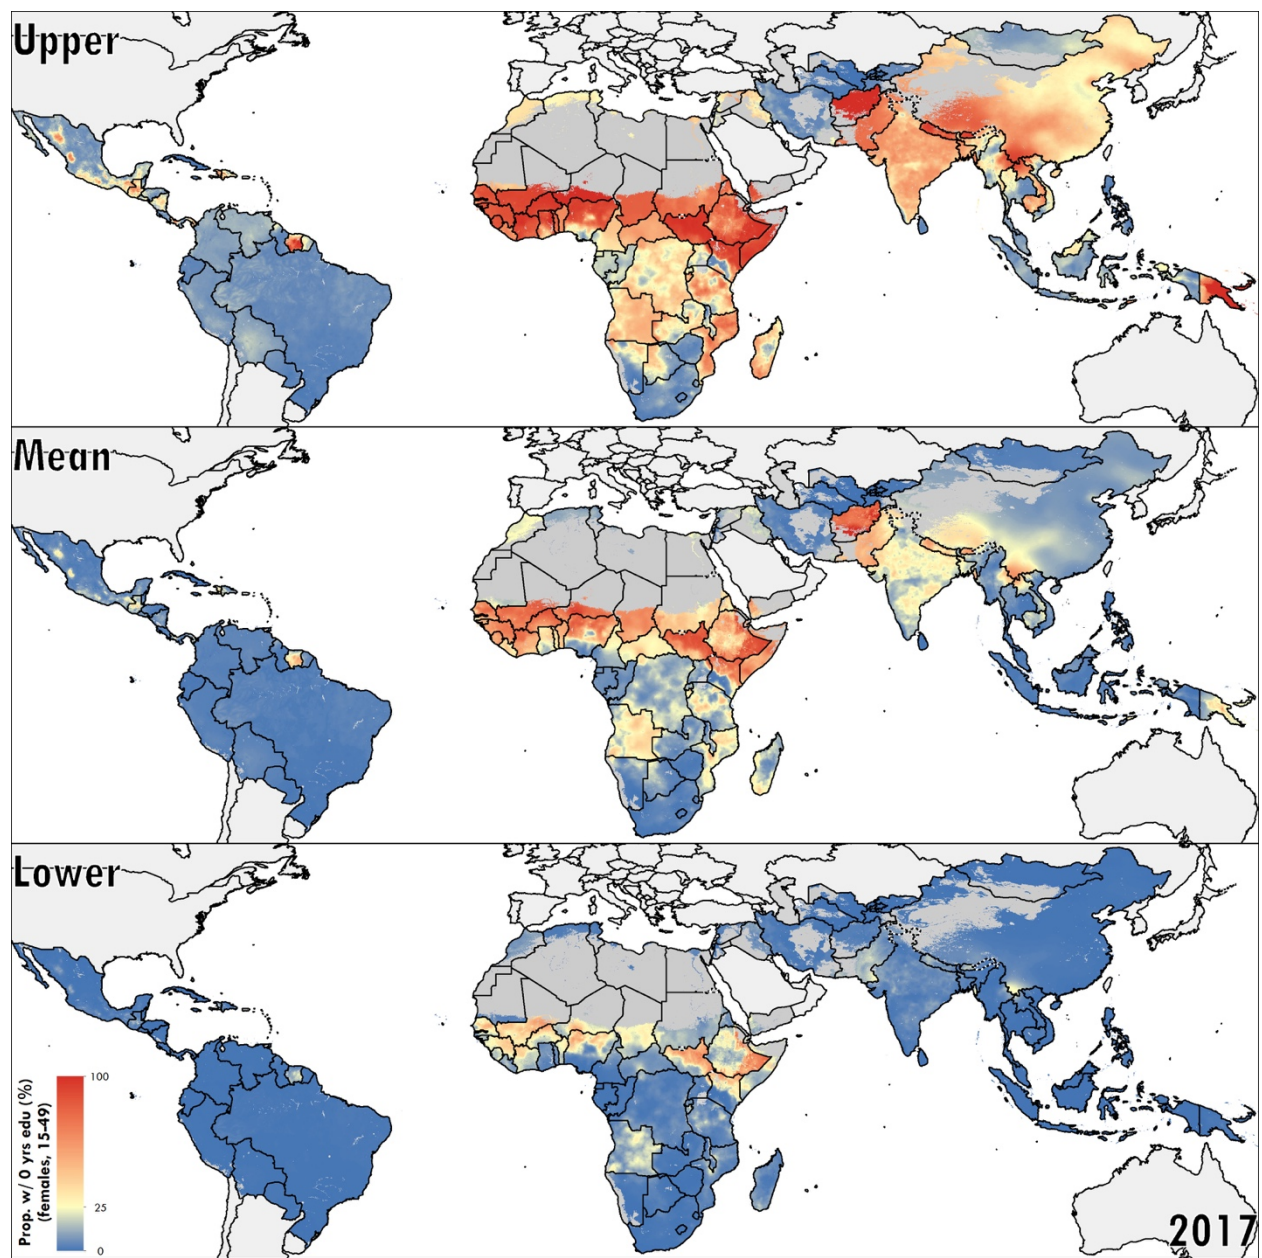

Supplementary Figure 21. 12+ years, men ages 15–49 posterior means and 95% uncertainty interval, 2017



Supplementary Figure 22. 12+ years, women ages 20–24 posterior means and 95% uncertainty interval, 2017



Supplementary Figure 23. 12+ years, men ages 20–24 posterior means and 95% uncertainty interval, 2017

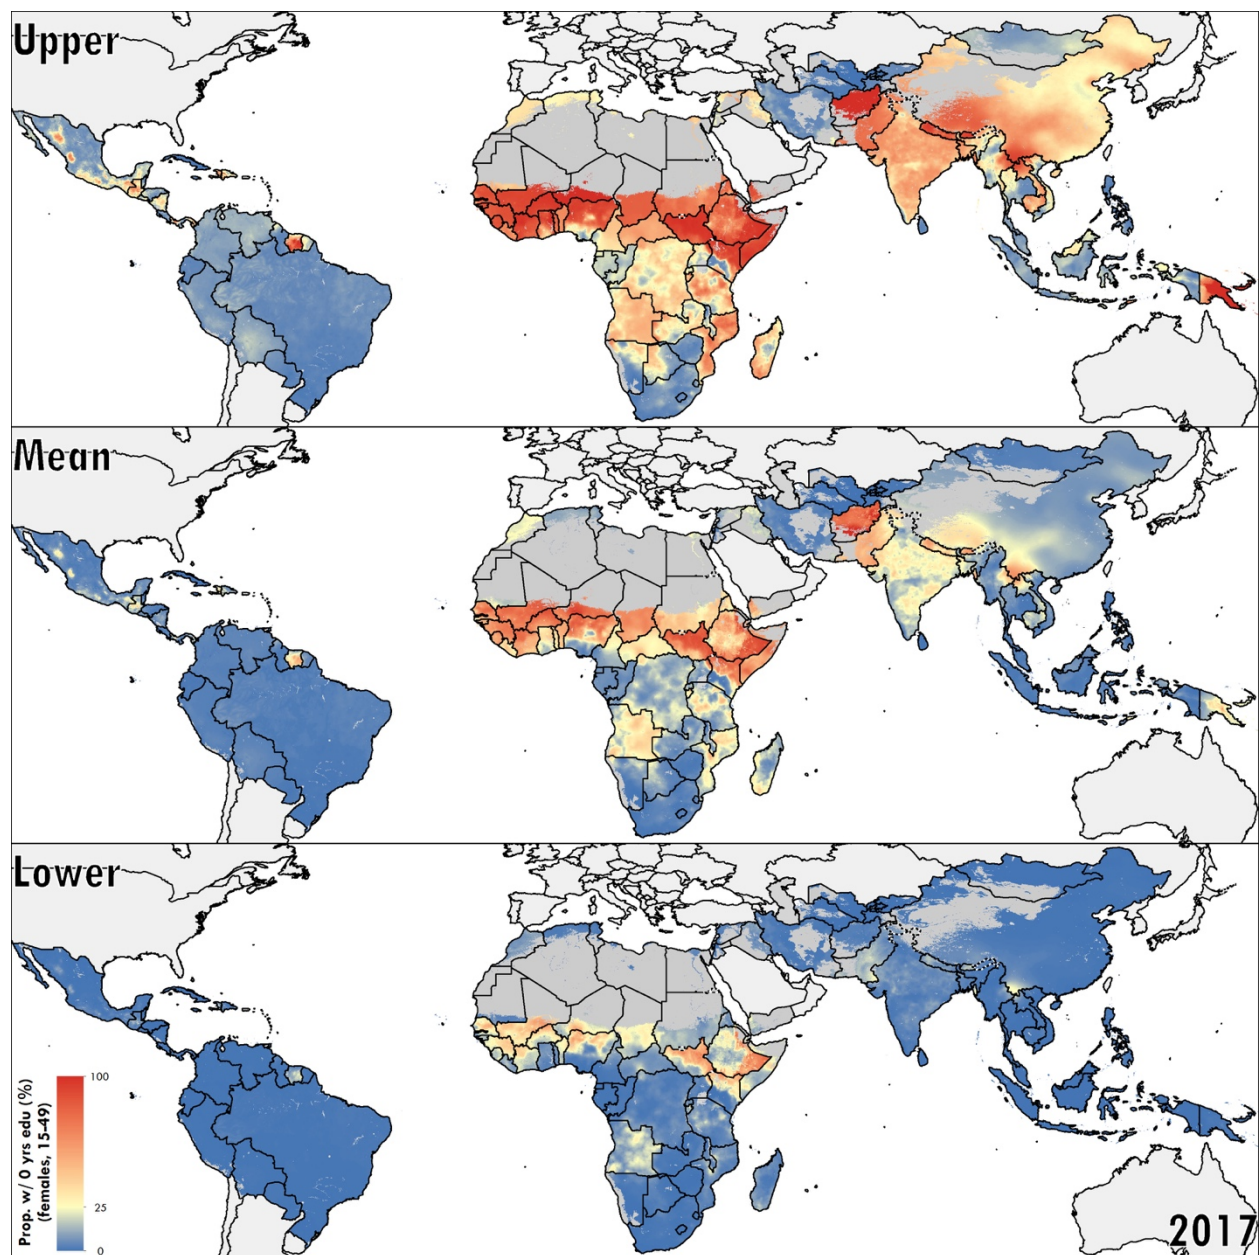

Supplementary Figure 24. Mean years, women ages 15–49 posterior means and 95% uncertainty interval

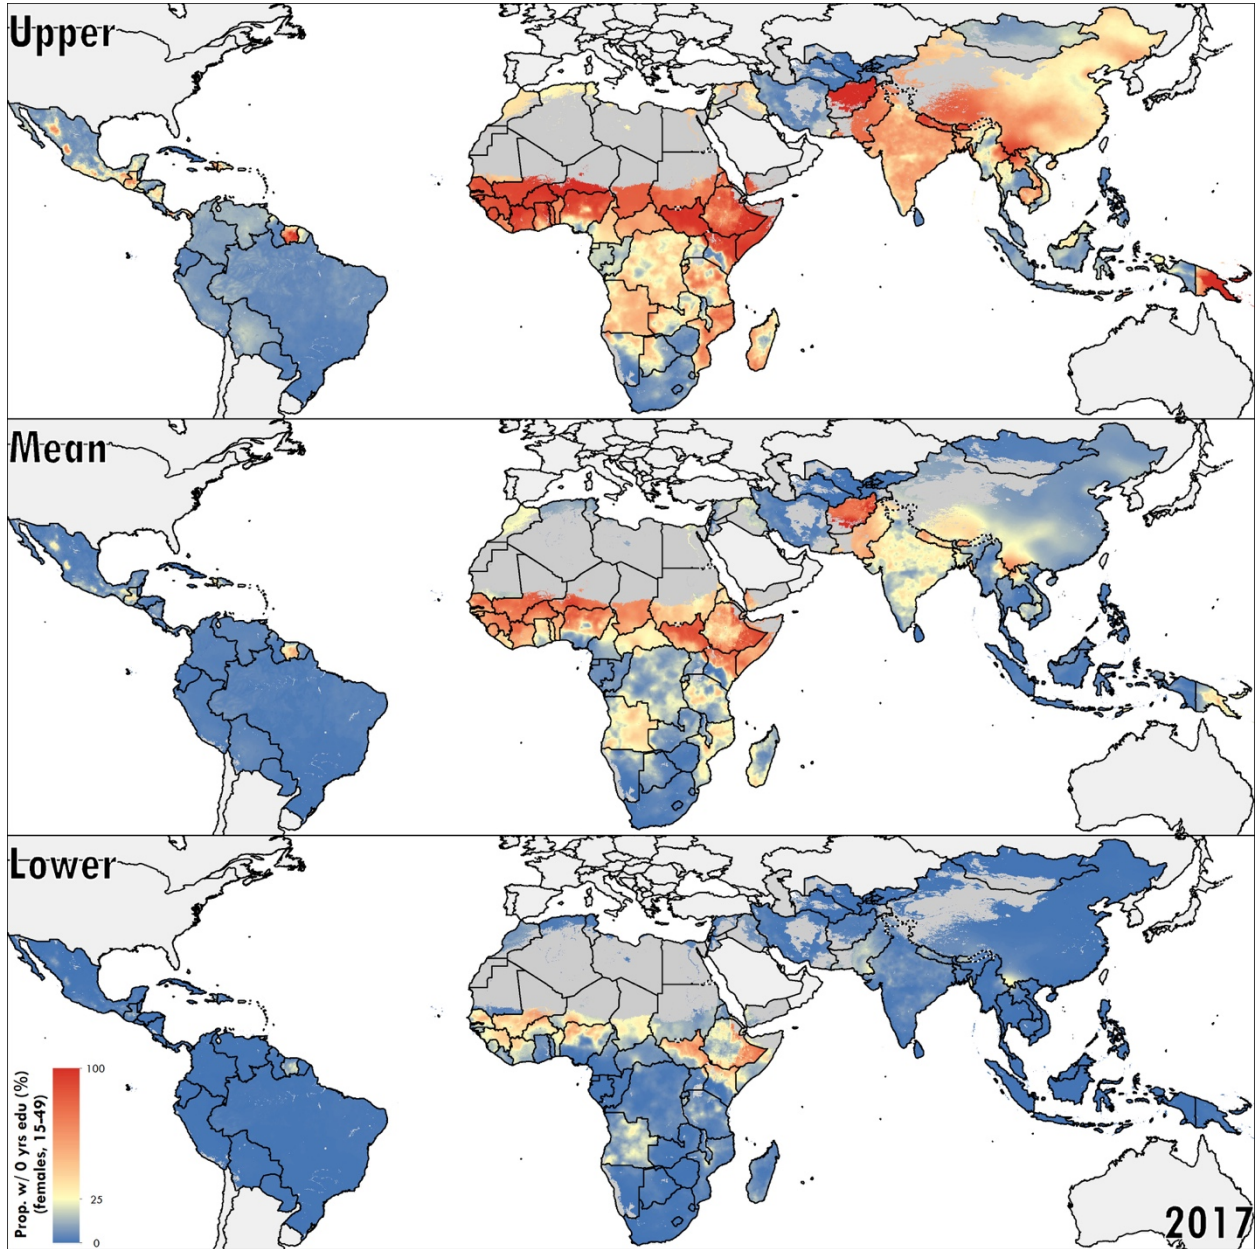

Supplementary Figure 25. Mean years, men ages 15–49 posterior means and 95% uncertainty interval





Supplementary Figure 26. Mean years, women ages 20–24 posterior means and 95% uncertainty interval



Supplementary Figure 27. Mean years, men ages 20–24 posterior means and 95% uncertainty interval

## 5.3 Model validation

### 5.3.1 In-sample metrics

For each indicator, we generated a suite of diagnostic plots for each region and country estimated, in order to assess the in-sample performance of our model and compare to national-level estimates produced by GBD.

To explore residual error over space and time, absolute error (data minus predicted posterior mean estimates at the corresponding pixels) was produced at five-year intervals (2000, 2005, 2010, and 2015) for each modelled region (see Supplementary Figs 28–75).

### 5.3.2 Metrics of predictive validity

In order to assess the predictive validity of our estimates, we validated our models using spatially stratified five-fold out-of-sample cross-validation. To do so, we first split all survey data into five groups by randomly sorting a list of unique identifiers for each survey, calculating the cumulative number of spatial points represented by the surveys in this list, and then dividing the list into five parts at the point where this number of spatial points was closest to 20%, 40%, 60%, and 80% of the total. This resulted in five groups that were approximately equal in terms of the total number of spatial points and contain entire surveys (i.e., all the data points derived from each survey were contained exclusively within only one fold). These spatial partitions were then allocated to one of five folds for cross-validation. For validation, each geostatistical model was run five times, each time holding out data from one of the folds, generating a set of out-of-sample predictions for the held-out data. For each indicator, a full suite of out-of-sample predictions over the entire dataset was generated by combining the out-of-sample predictions from the five cross-validation runs.

Using these out-of-sample predictions, we then calculated mean error (ME, or bias), root-mean-squared-error (RMSE, which summarises total variance), and 95% coverage of our predictive intervals (the proportion of observed out-of-sample data that fall within our predicted 95% credible intervals) aggregated up to different administrative levels (0, 1, and 2) as defined by FAO Global Administrative Unit Layers (GAUL). Administrative level 0 (admin 0) borders correspond to national boundaries, admin 1 borders generally correspond to regions, provinces, or state-level boundaries within a country, and admin 2 borders correspond to the next finer subdivision, often districts, within regions. These metrics are summarised in Supplementary Tables 24–43 for each indicator and are calculated across all regions. Included in the sample tables for comparison are the same metrics calculated on in-sample predictions.

**Supplementary Table 24. In sample predictive metrics for zero years of education (women, ages 15–49), aggregated to different administrative levels (admin 0, admin 1, and admin 2)**

| Aggregation | Year | Median SS  | Mean Err | RMSE   | Corr.  | 95% Cov. |
|-------------|------|------------|----------|--------|--------|----------|
| Admin 0     | 2000 | 12914.7806 | 0.0064   | 0.0113 | 0.9980 | 0.9116   |
| Admin 0     | 2005 | 15225.4068 | 0.0069   | 0.0183 | 0.9971 | 0.9505   |
| Admin 0     | 2010 | 19025.0000 | -0.0011  | 0.0020 | 0.9993 | 0.9925   |
| Admin 0     | 2015 | 13782.0000 | 0.0018   | 0.0050 | 0.9996 | 0.9574   |
| Admin 1     | 2000 | 1228.0000  | 0.0064   | 0.0162 | 0.9960 | 0.9116   |
| Admin 1     | 2005 | 750.0000   | 0.0069   | 0.0274 | 0.9942 | 0.9505   |
| Admin 1     | 2010 | 1077.8178  | -0.0011  | 0.0049 | 0.9966 | 0.9925   |
| Admin 1     | 2015 | 716.5000   | 0.0018   | 0.0126 | 0.9971 | 0.9574   |
| Admin 2     | 2000 | 114.9720   | 0.0064   | 0.0307 | 0.9858 | 0.9116   |
| Admin 2     | 2005 | 31.0000    | 0.0069   | 0.0510 | 0.9801 | 0.9505   |
| Admin 2     | 2010 | 41.1510    | -0.0011  | 0.0092 | 0.9883 | 0.9925   |
| Admin 2     | 2015 | 31.6316    | 0.0018   | 0.0308 | 0.9846 | 0.9574   |

**Supplementary Table 25. In sample predictive metrics for zero years of education (men, ages 15–49), aggregated to different administrative levels (admin 0, admin 1, and admin2)**

| Aggregation | Year | Median SS  | Mean Err | RMSE   | Corr.  | 95% Cov. |
|-------------|------|------------|----------|--------|--------|----------|
| Admin 0     | 2000 | 11706.6693 | 0.0049   | 0.0083 | 0.9975 | 0.9105   |
| Admin 0     | 2005 | 13164.3894 | 0.0050   | 0.0116 | 0.9978 | 0.9441   |
| Admin 0     | 2010 | 17541.0000 | 0.0007   | 0.0010 | 0.9996 | 0.9675   |
| Admin 0     | 2015 | 12977.0000 | 0.0016   | 0.0034 | 0.9995 | 0.9562   |
| Admin 1     | 2000 | 1126.0000  | 0.0049   | 0.0121 | 0.9955 | 0.9105   |
| Admin 1     | 2005 | 690.0000   | 0.0050   | 0.0187 | 0.9943 | 0.9441   |
| Admin 1     | 2010 | 1028.4576  | 0.0007   | 0.0022 | 0.9986 | 0.9675   |
| Admin 1     | 2015 | 671.0000   | 0.0016   | 0.0086 | 0.9962 | 0.9562   |
| Admin 2     | 2000 | 111.7156   | 0.0049   | 0.0270 | 0.9791 | 0.9105   |
| Admin 2     | 2005 | 28.8900    | 0.0050   | 0.0386 | 0.9758 | 0.9441   |
| Admin 2     | 2010 | 38.1188    | 0.0007   | 0.0047 | 0.9932 | 0.9675   |
| Admin 2     | 2015 | 30.0000    | 0.0016   | 0.0247 | 0.9732 | 0.9562   |

Validation Plot for edu\_zero\_prop\_15\_49\_female by Country  
OOS: FALSE

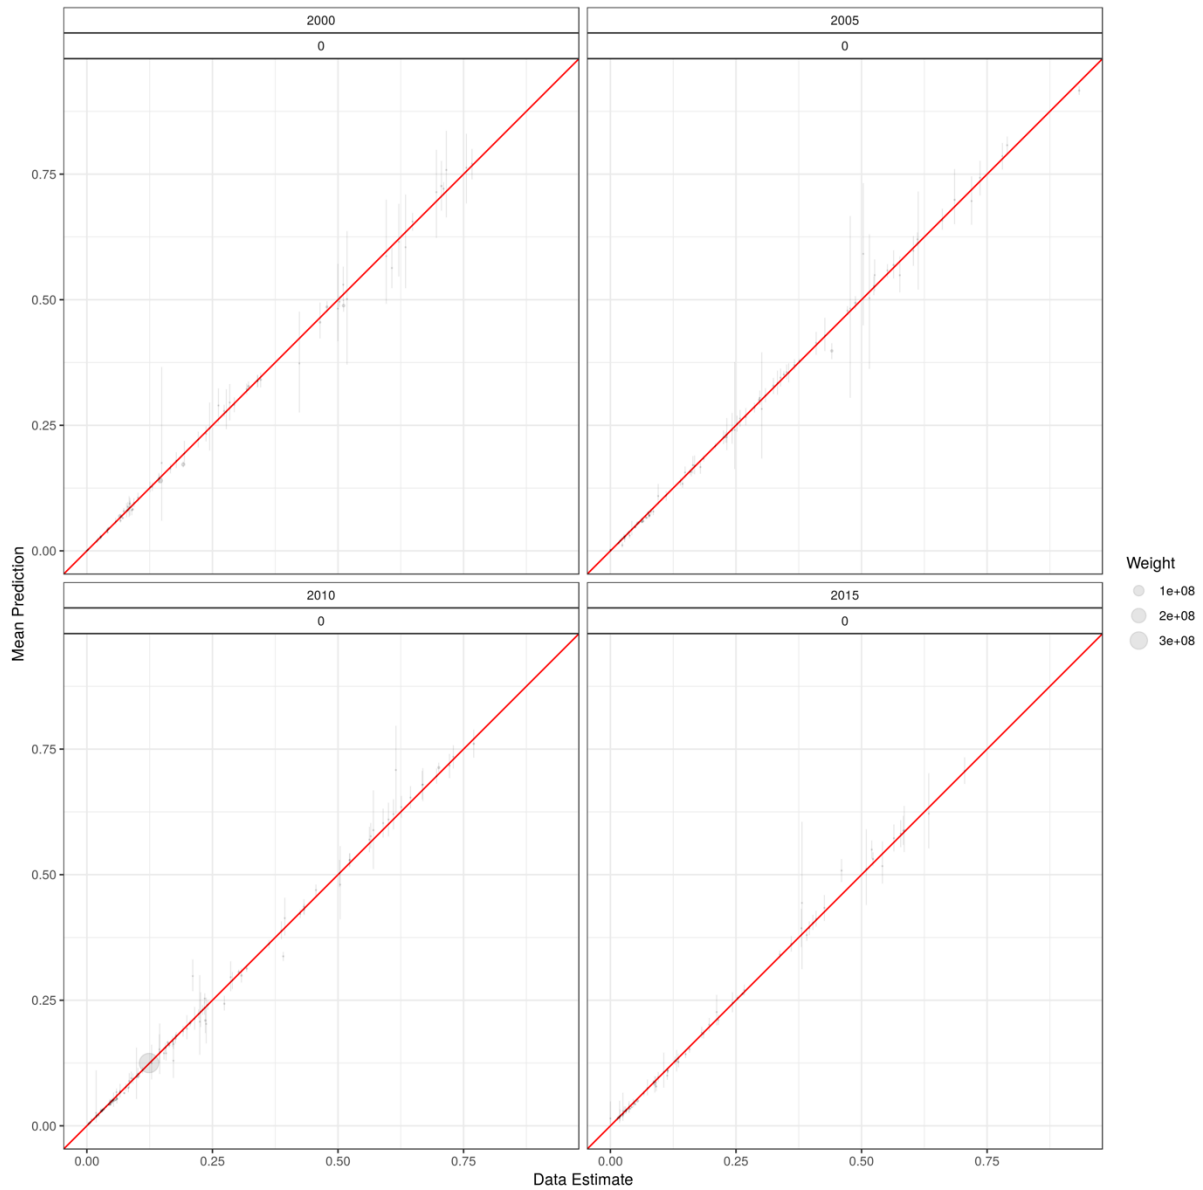

**Supplementary Figure 28. Zero years education (women, ages 15–49) admin 0 aggregation**  
Comparison of in-sample education predictions aggregated to admin 0 with 95% uncertainty intervals plotted against admin 1 aggregated data observations.

Validation Plot for edu\_zero\_prop\_15\_49\_female by Admin 1  
OOS: FALSE

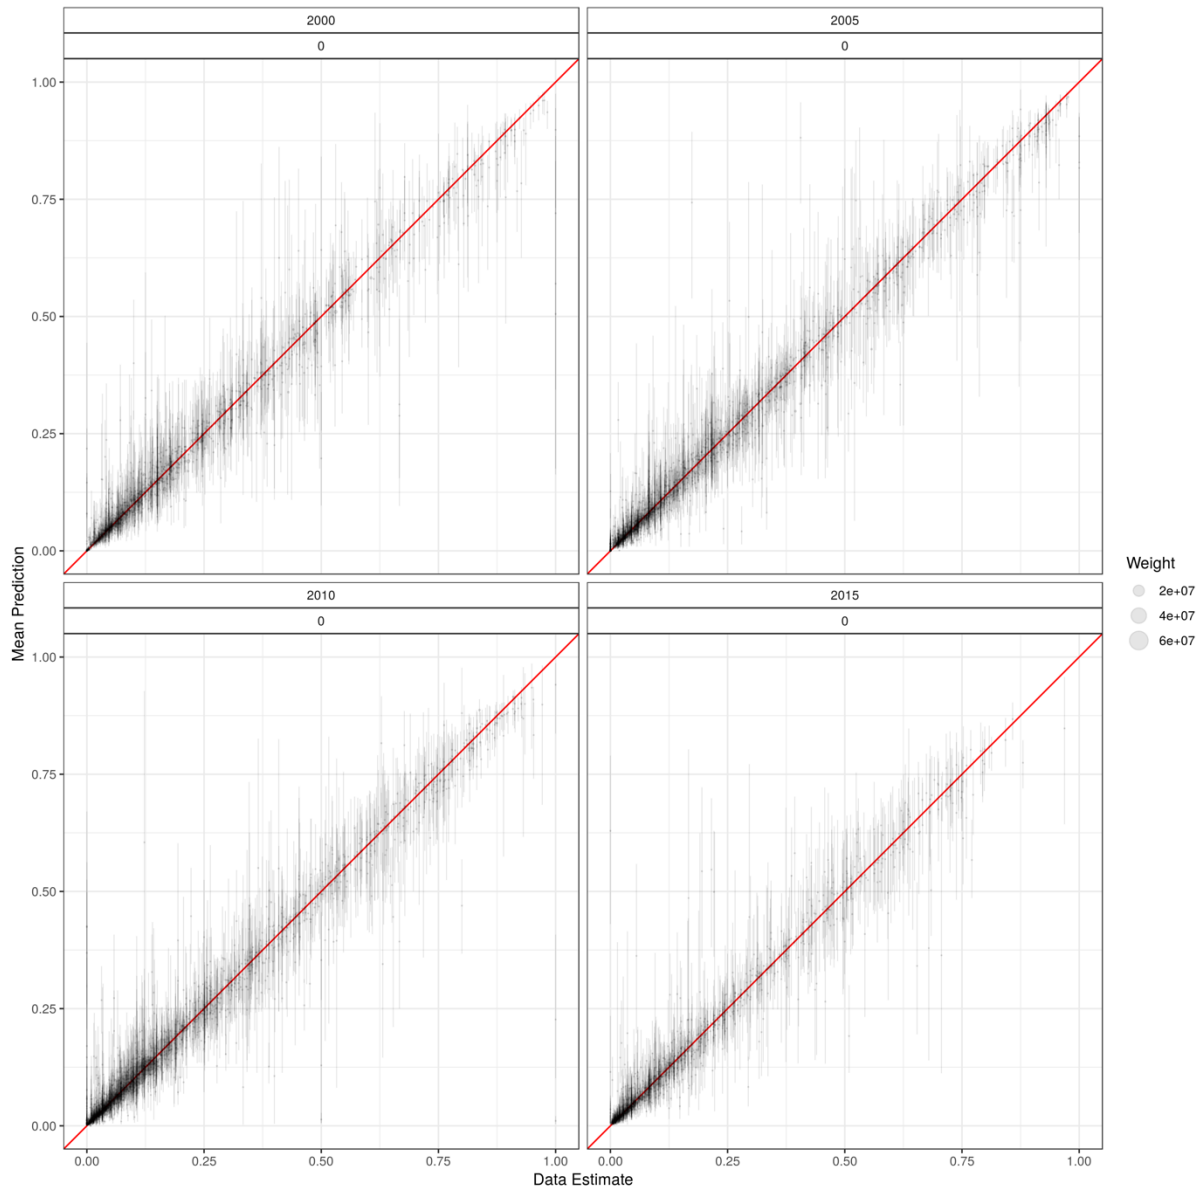

**Supplementary Figure 29. Zero years education (women, ages 15–49) admin 1 aggregation**  
Comparison of in-sample education predictions aggregated to admin 1 with 95% uncertainty intervals plotted against admin 1 aggregated data observations.

Validation Plot for edu\_zero\_prop\_15\_49\_female by Admin 2  
OOS: FALSE

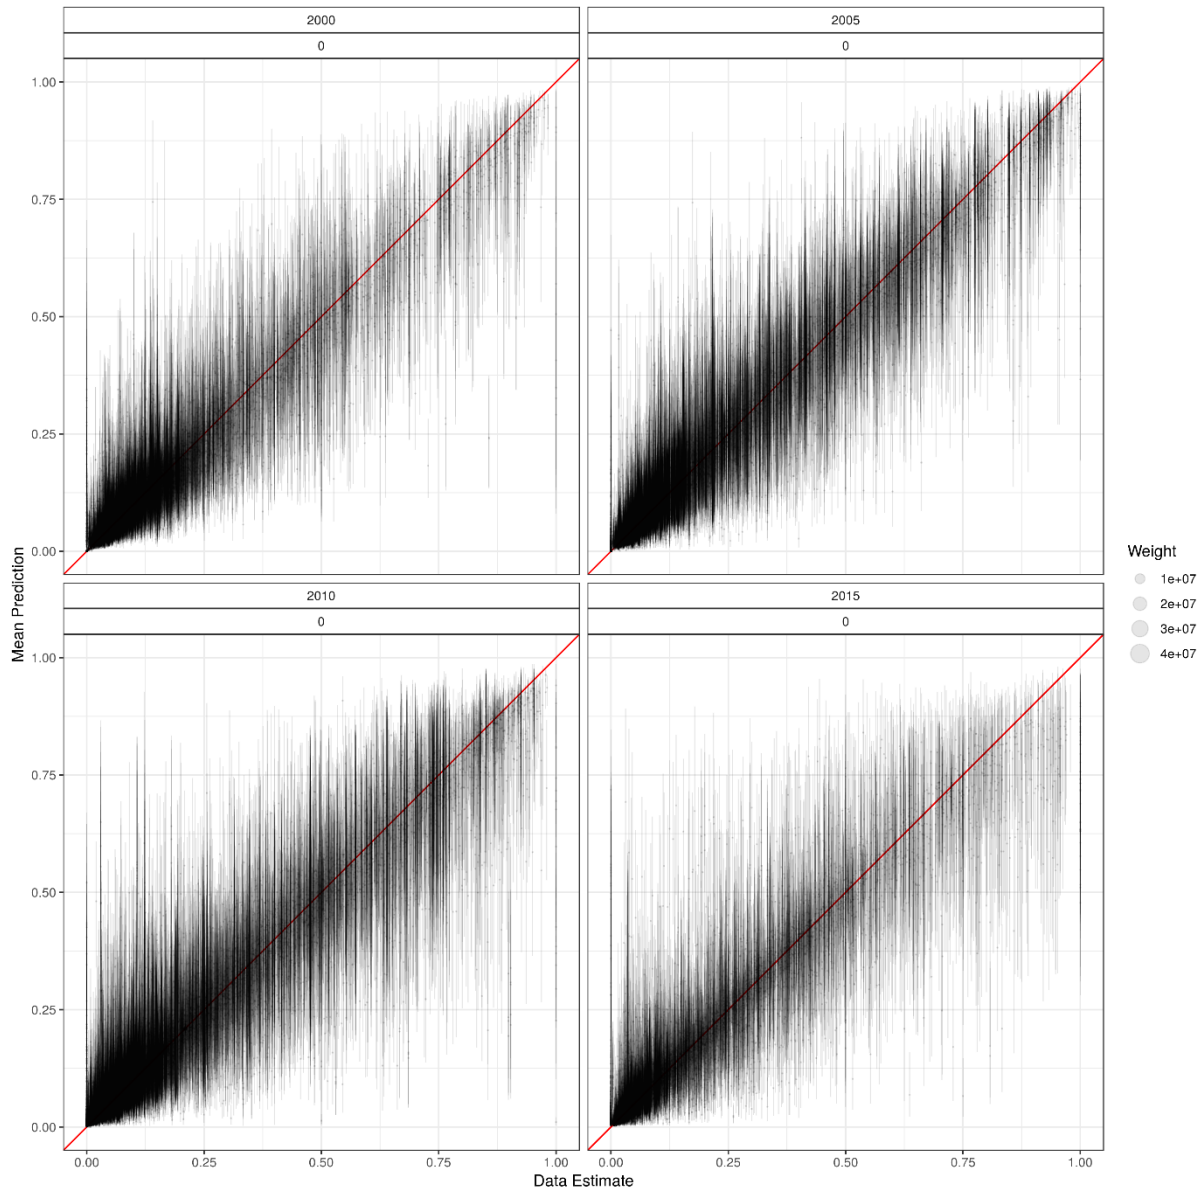

**Supplementary Figure 30. Zero years education (women, ages 15–49) admin 2 aggregation**  
Comparison of in-sample education predictions aggregated to admin 2 with 95% uncertainty intervals plotted against admin 1 aggregated data observations.

Validation Plot for edu\_zero\_prop\_15\_49\_male by Country  
OOS: FALSE

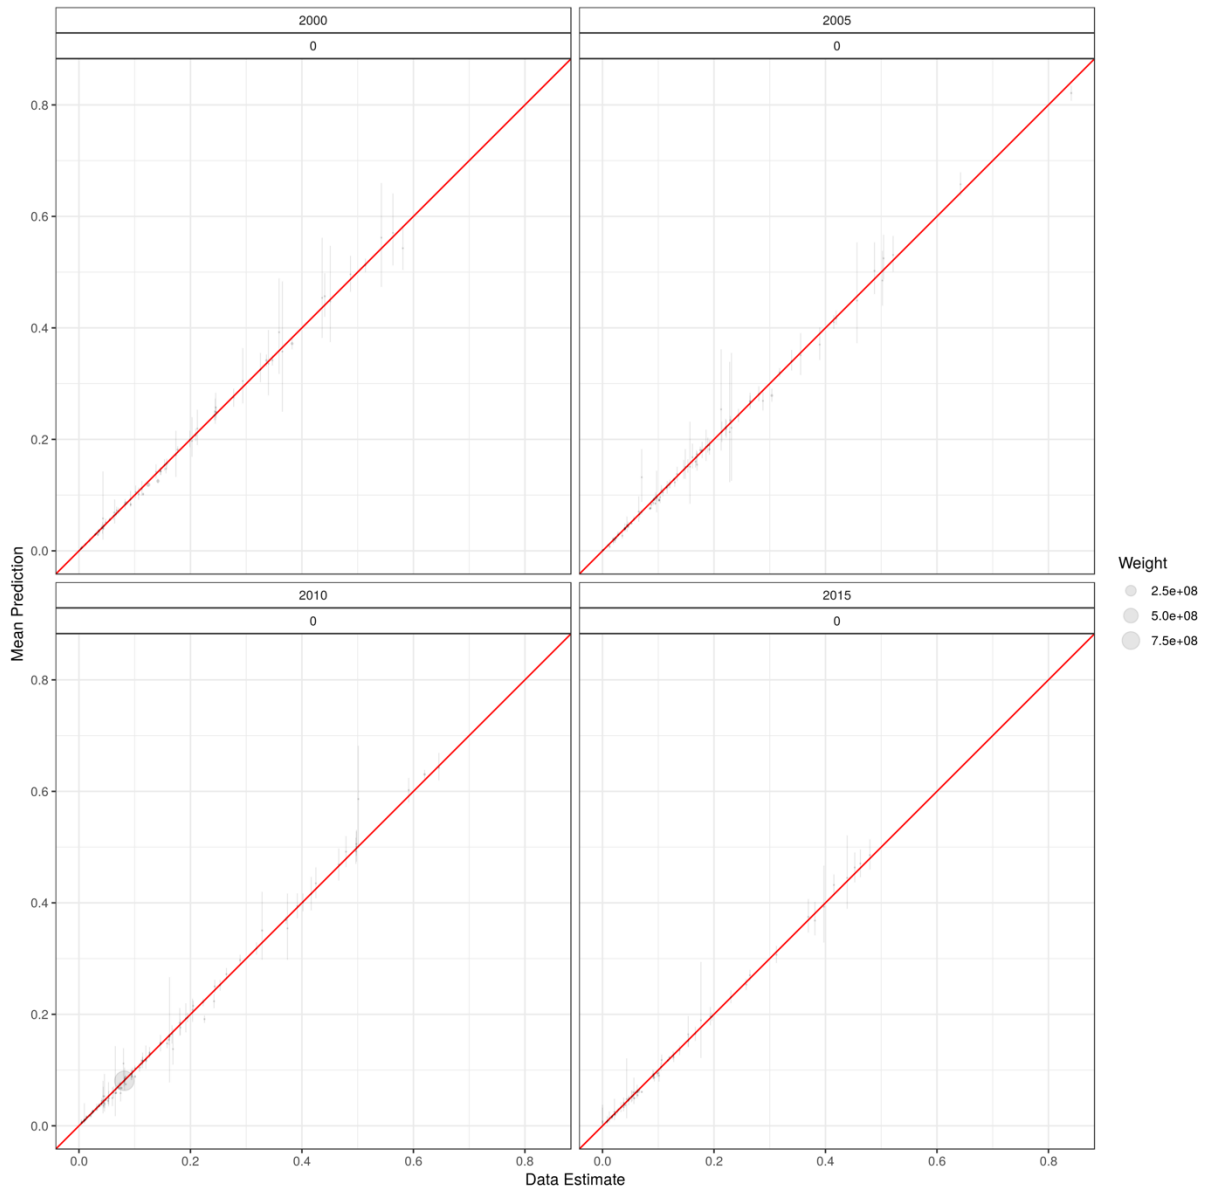

**Supplementary Figure 31. Zero years education (men, ages 15–49) admin 0 aggregation**  
Comparison of in-sample education predictions aggregated to admin 0 with 95% uncertainty intervals plotted against admin 1 aggregated data observations.



Validation Plot for edu\_zero\_prop\_15\_49\_male by Admin 1  
OOS: FALSE

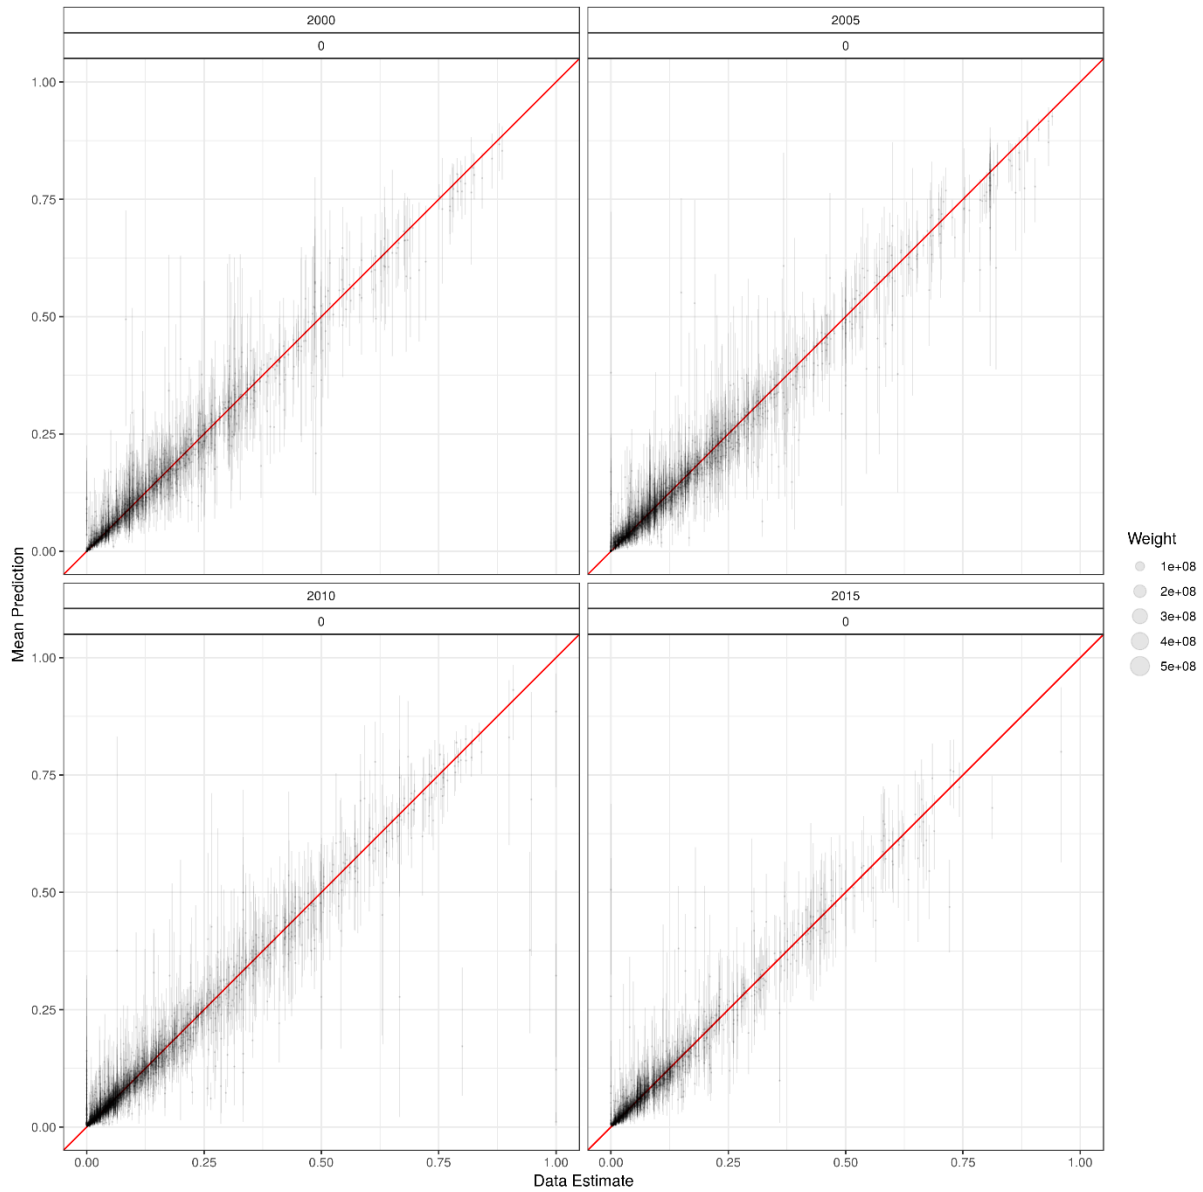

**Supplementary Figure 32. Zero years education (men, ages 15–49) admin 1 aggregation**  
Comparison of in-sample education predictions aggregated to admin 1 with 95% uncertainty intervals plotted against admin 1 aggregated data observations.

Validation Plot for edu\_zero\_prop\_15\_49\_male by Admin 2  
OOS: FALSE

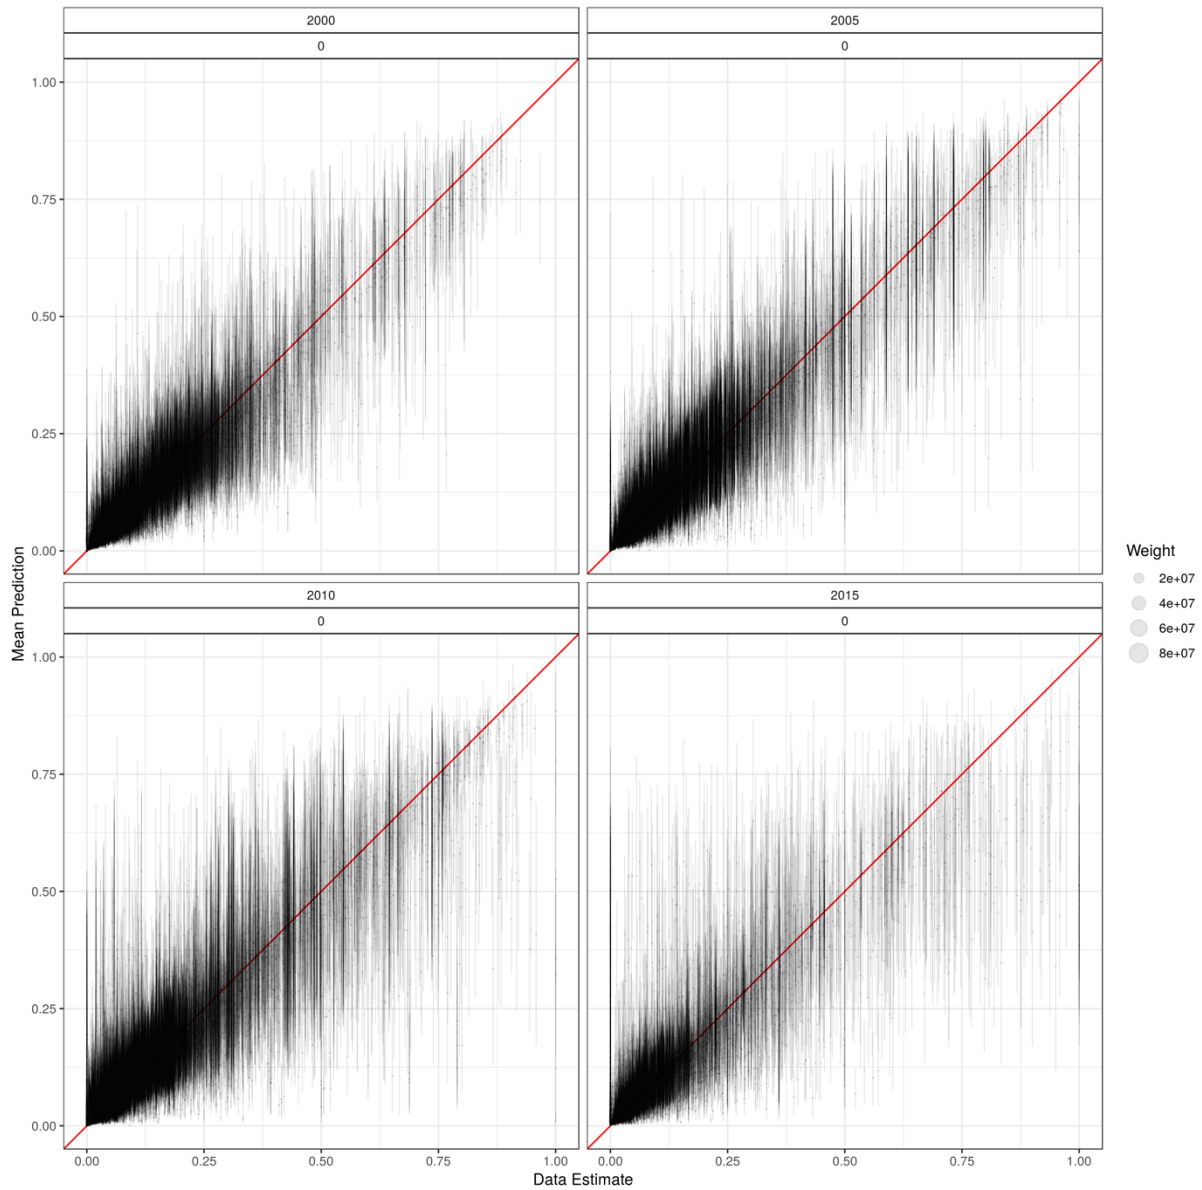

**Supplementary Figure 33. Zero years education (men, ages 15–49) admin 2 aggregation**  
Comparison of in-sample education predictions aggregated to admin 2 with 95% uncertainty intervals plotted against admin 1 aggregated data observations.

**Supplementary Table 26. In sample predictive metrics for zero years of education (women, ages 20-24), aggregated to admin 0, admin 1, and admin 2**

| Aggregation | Year | Median SS | Mean Err | RMSE   | Corr.  | 95% Cov. |
|-------------|------|-----------|----------|--------|--------|----------|
| Admin 0     | 2000 | 2528.1849 | 0.0014   | 0.0062 | 0.9991 | 0.9214   |
| Admin 0     | 2005 | 2962.2179 | 0.0034   | 0.0114 | 0.9983 | 0.9470   |
| Admin 0     | 2010 | 3493.0000 | -0.0003  | 0.0013 | 0.9998 | 0.9587   |
| Admin 0     | 2015 | 2362.0000 | -0.0007  | 0.0033 | 0.9998 | 0.9707   |
| Admin 1     | 2000 | 215.0000  | 0.0014   | 0.0108 | 0.9975 | 0.9214   |
| Admin 1     | 2005 | 138.0000  | 0.0034   | 0.0195 | 0.9961 | 0.9470   |
| Admin 1     | 2010 | 190.0000  | -0.0003  | 0.0045 | 0.9990 | 0.9587   |
| Admin 1     | 2015 | 128.0000  | -0.0007  | 0.0131 | 0.9958 | 0.9707   |
| Admin 2     | 2000 | 19.0000   | 0.0014   | 0.0238 | 0.9887 | 0.9214   |
| Admin 2     | 2005 | 5.0471    | 0.0034   | 0.0449 | 0.9808 | 0.9470   |
| Admin 2     | 2010 | 6.2313    | -0.0003  | 0.0106 | 0.9946 | 0.9587   |
| Admin 2     | 2015 | 4.8115    | -0.0007  | 0.0350 | 0.9738 | 0.9707   |

**Supplementary Table 27. In sample predictive metrics for zero years of education (men, ages 20–24), aggregated to admin 0, admin 1, and admin 2**

| Aggregation | Year | Median SS | Mean Err | RMSE   | Corr.  | 95% Cov. |
|-------------|------|-----------|----------|--------|--------|----------|
| Admin 0     | 2000 | 2141.7815 | 0.0002   | 0.0039 | 0.9990 | 0.9104   |
| Admin 0     | 2005 | 2206.0000 | 0.0027   | 0.0066 | 0.9988 | 0.9398   |
| Admin 0     | 2010 | 2828.0000 | 0.0003   | 0.0007 | 0.9998 | 0.9666   |
| Admin 0     | 2015 | 2306.0000 | -0.0001  | 0.0019 | 0.9996 | 0.9676   |
| Admin 1     | 2000 | 192.0000  | 0.0002   | 0.0084 | 0.9965 | 0.9104   |
| Admin 1     | 2005 | 119.5162  | 0.0027   | 0.0154 | 0.9942 | 0.9398   |
| Admin 1     | 2010 | 174.1984  | 0.0003   | 0.0019 | 0.9987 | 0.9666   |
| Admin 1     | 2015 | 113.0000  | -0.0001  | 0.0101 | 0.9926 | 0.9676   |
| Admin 2     | 2000 | 18.9655   | 0.0002   | 0.0228 | 0.9785 | 0.9104   |
| Admin 2     | 2005 | 4.9025    | 0.0027   | 0.0372 | 0.9691 | 0.9398   |
| Admin 2     | 2010 | 5.9620    | 0.0003   | 0.0049 | 0.9918 | 0.9666   |
| Admin 2     | 2015 | 4.3568    | -0.0001  | 0.0299 | 0.9477 | 0.9676   |

Validation Plot for edu\_zero\_prop\_20\_24\_female by Country  
OOS: FALSE

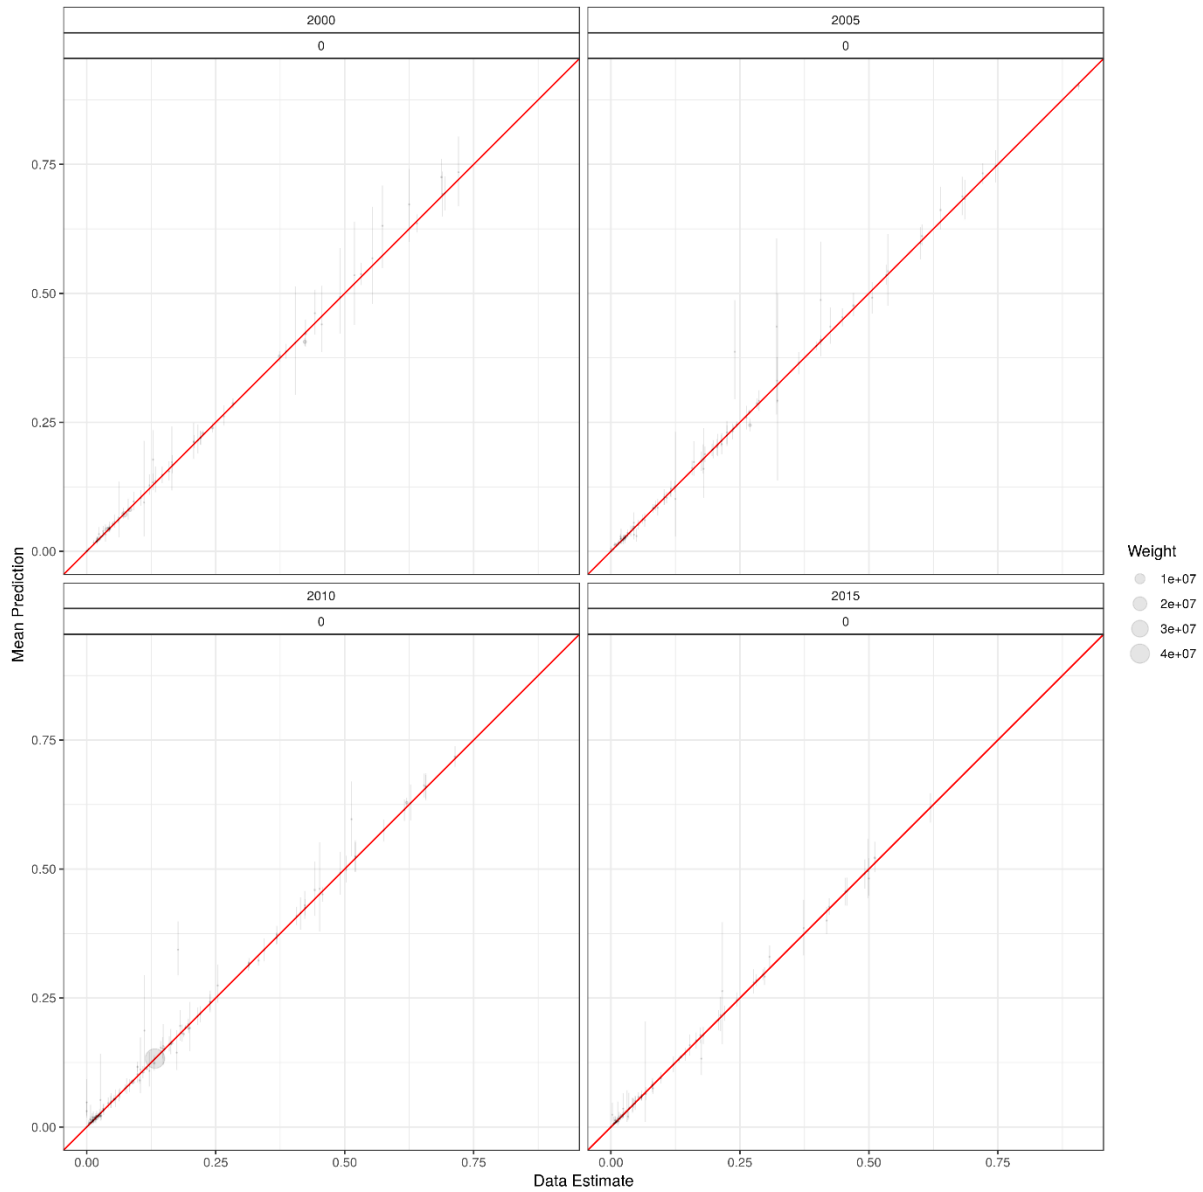

**Supplementary Figure 34. Zero years education (women, ages 20–24) admin 0 aggregation**  
Comparison of in-sample education predictions aggregated to admin 0 with 95% uncertainty intervals plotted against admin 1 aggregated data observations.

Validation Plot for edu\_zero\_prop\_20\_24\_female by Admin 1  
OOS: FALSE

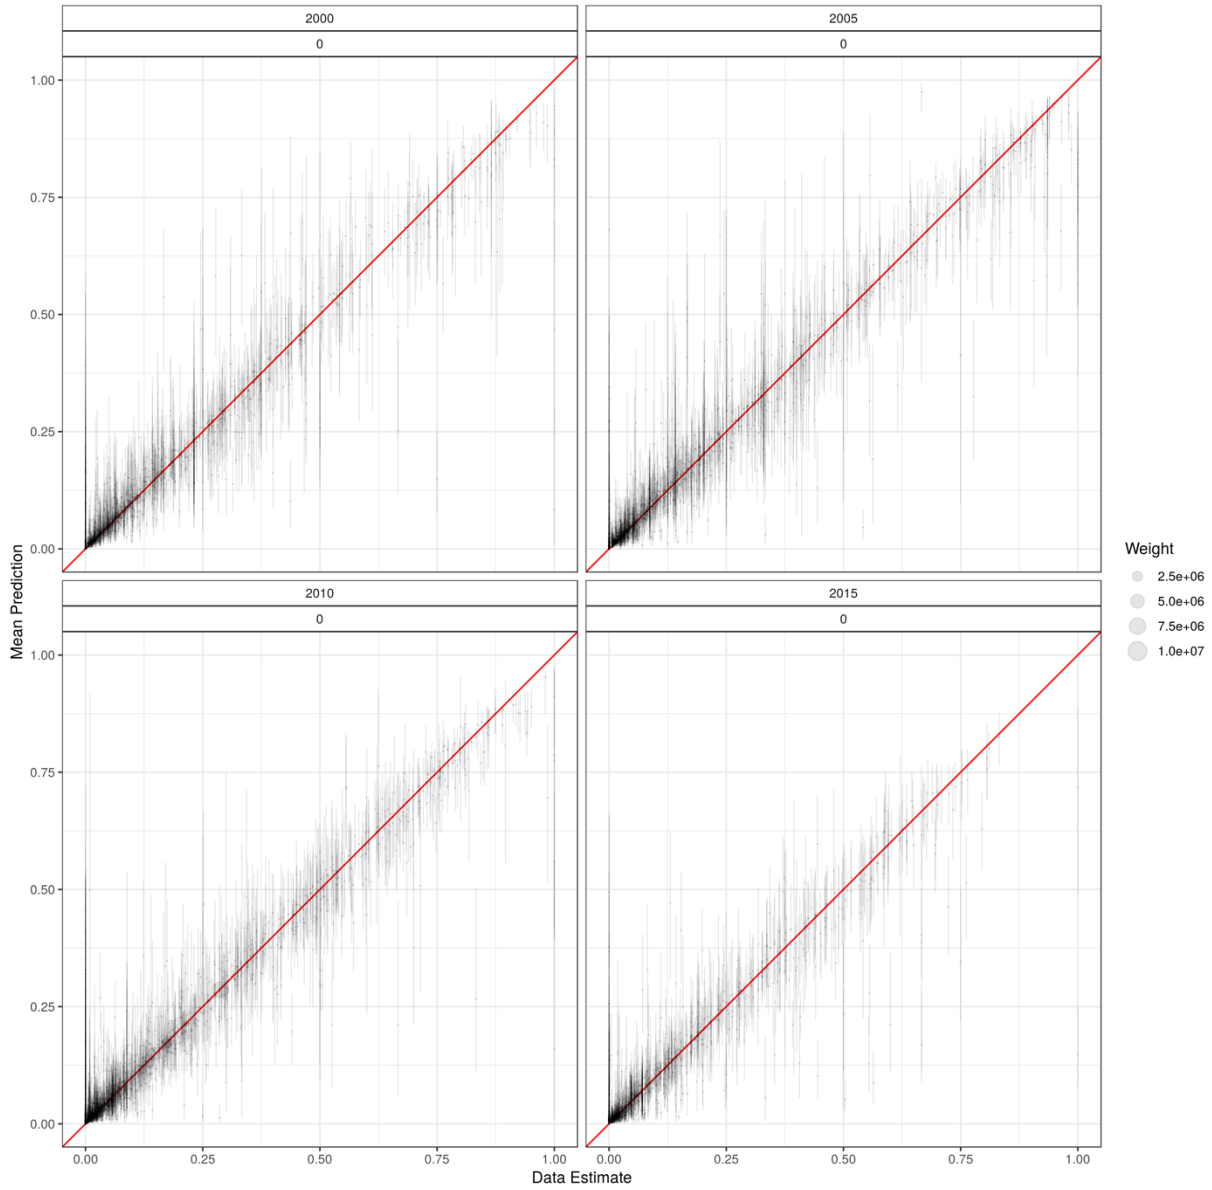

**Supplementary Figure 35. Zero years education (women, ages 20–24) admin 1 aggregation**  
Comparison of in-sample education predictions aggregated to admin 1 with 95% uncertainty intervals plotted against admin 1 aggregated data observations.

Validation Plot for edu\_zero\_prop\_20\_24\_female by Admin 2  
OOS: FALSE

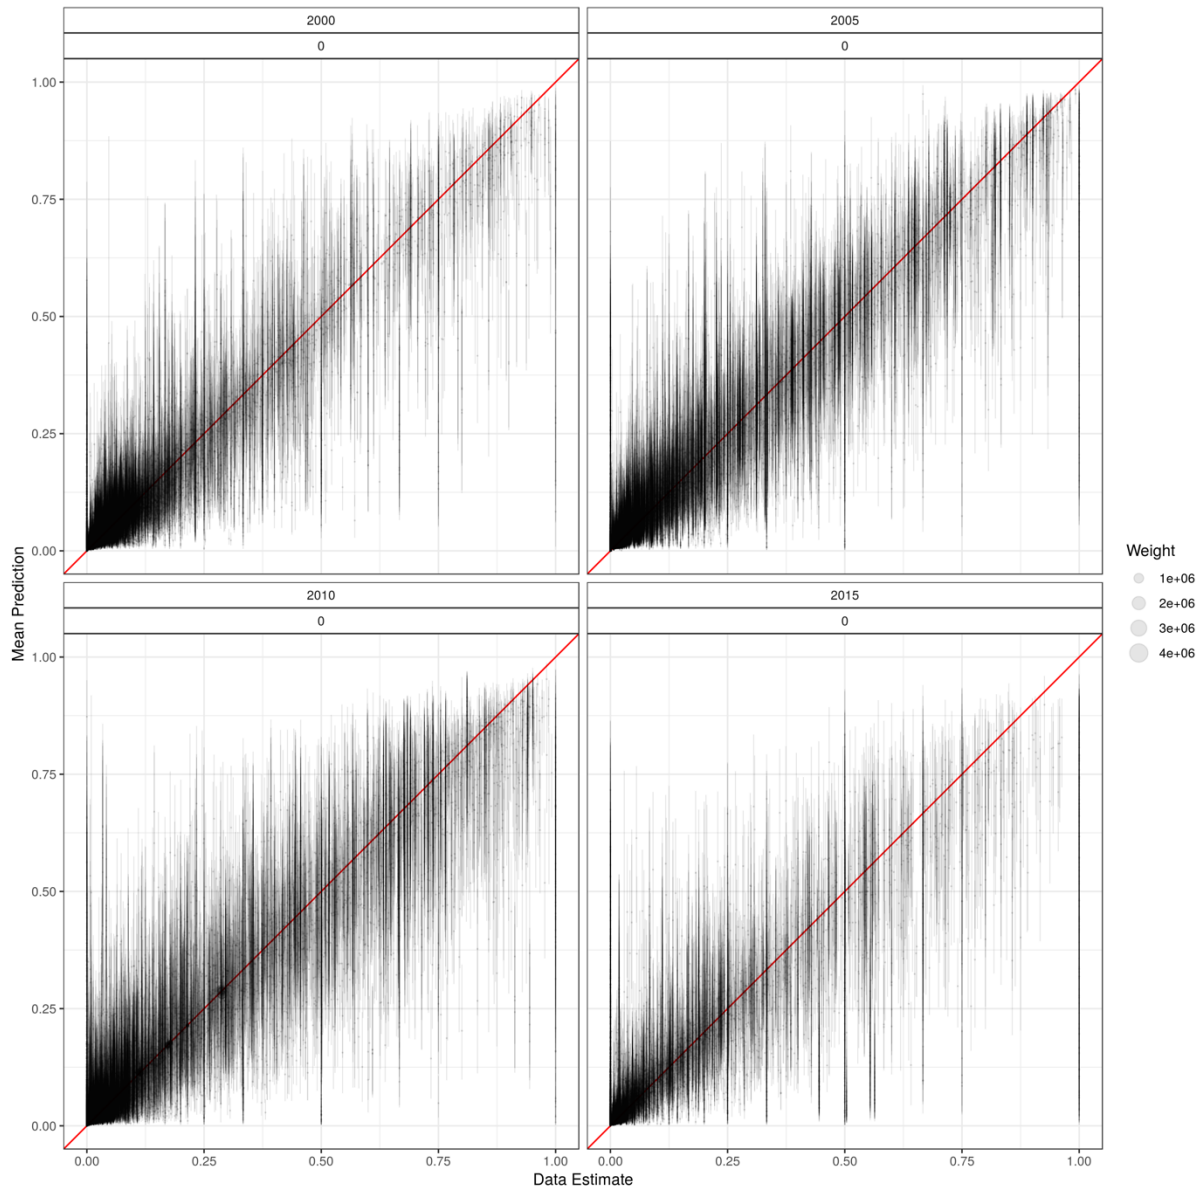

**Supplementary Figure 36. Zero years education (women, ages 20–24) admin 2 aggregation**  
Comparison of in-sample education predictions aggregated to admin 2 with 95% uncertainty intervals plotted against admin 1 aggregated data observations.

Validation Plot for edu\_zero\_prop\_20\_24\_male by Country  
OOS: FALSE

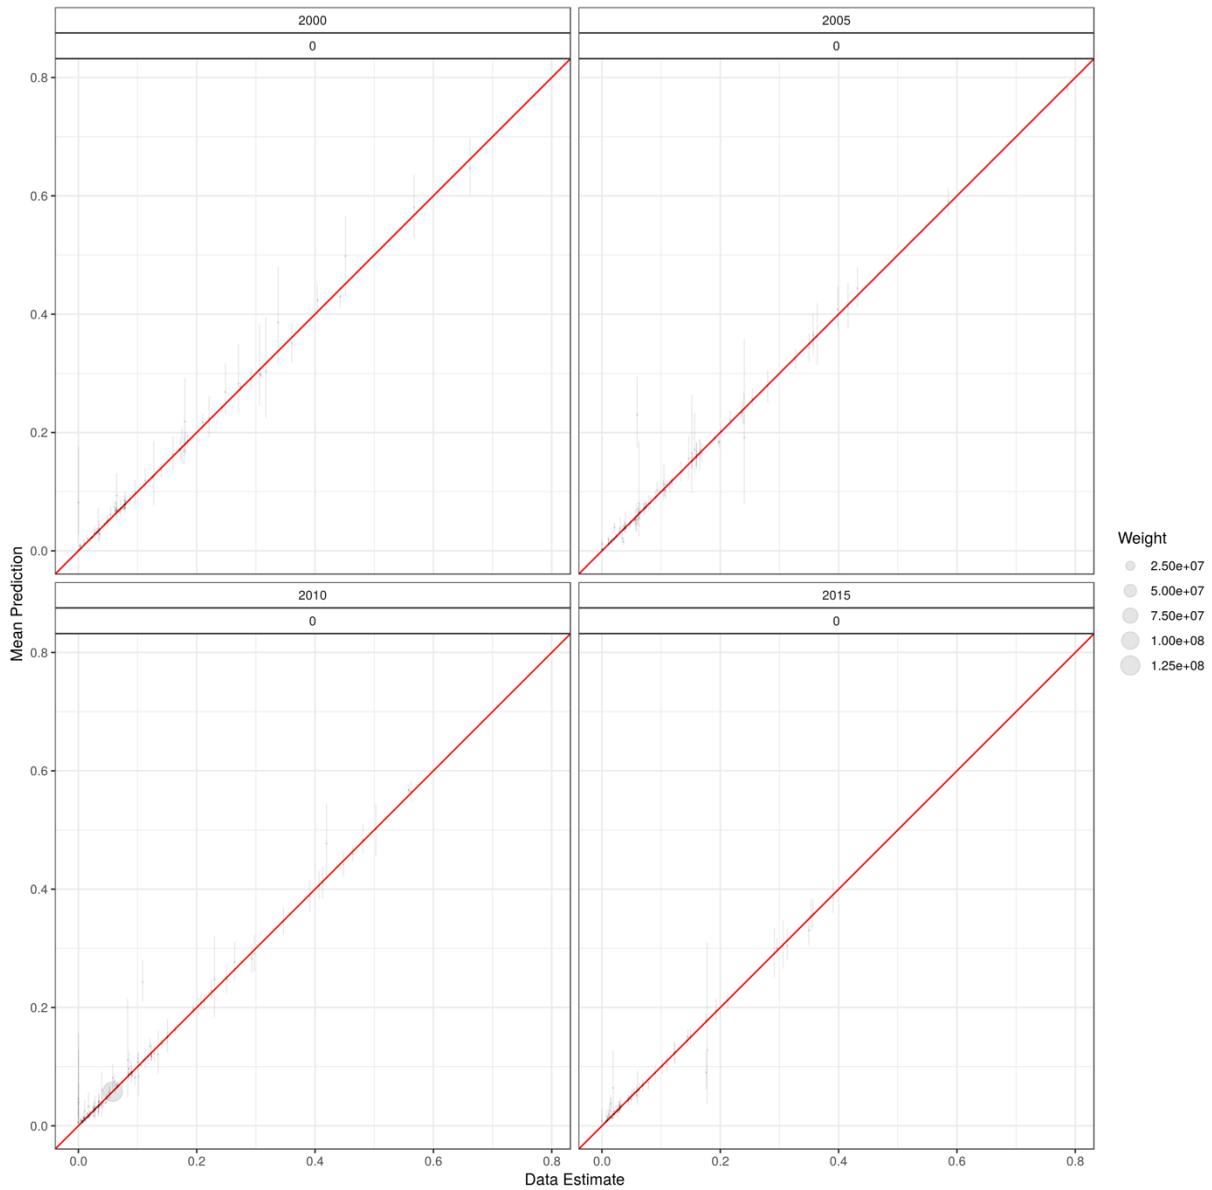

**Supplementary Figure 37. Zero years education (men, ages 20–24) admin 0 aggregation**  
Comparison of in-sample education predictions aggregated to admin 0 with 95% uncertainty intervals plotted against admin 1 aggregated data observations.

Validation Plot for edu\_zero\_prop\_20\_24\_male by Admin 1  
OOS: FALSE

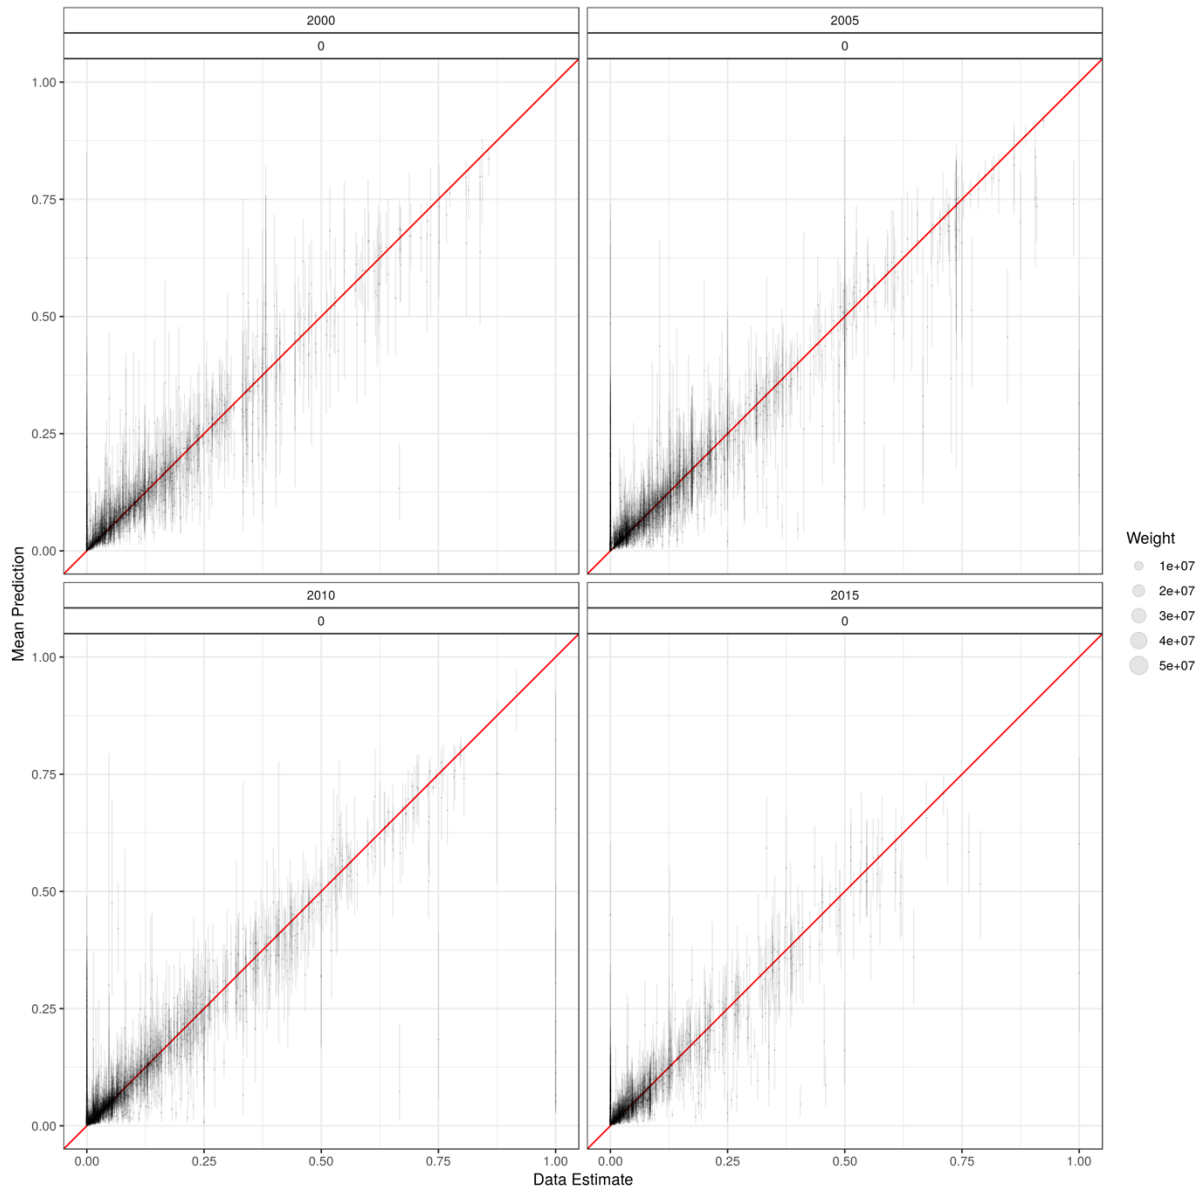

**Supplementary Figure 38. Zero years education (men, ages 20–24) admin 1 aggregation**  
Comparison of in-sample education predictions aggregated to admin 1 with 95% uncertainty intervals plotted against admin 1 aggregated data observations.



Validation Plot for edu\_zero\_prop\_20\_24\_male by Admin 2  
OOS: FALSE

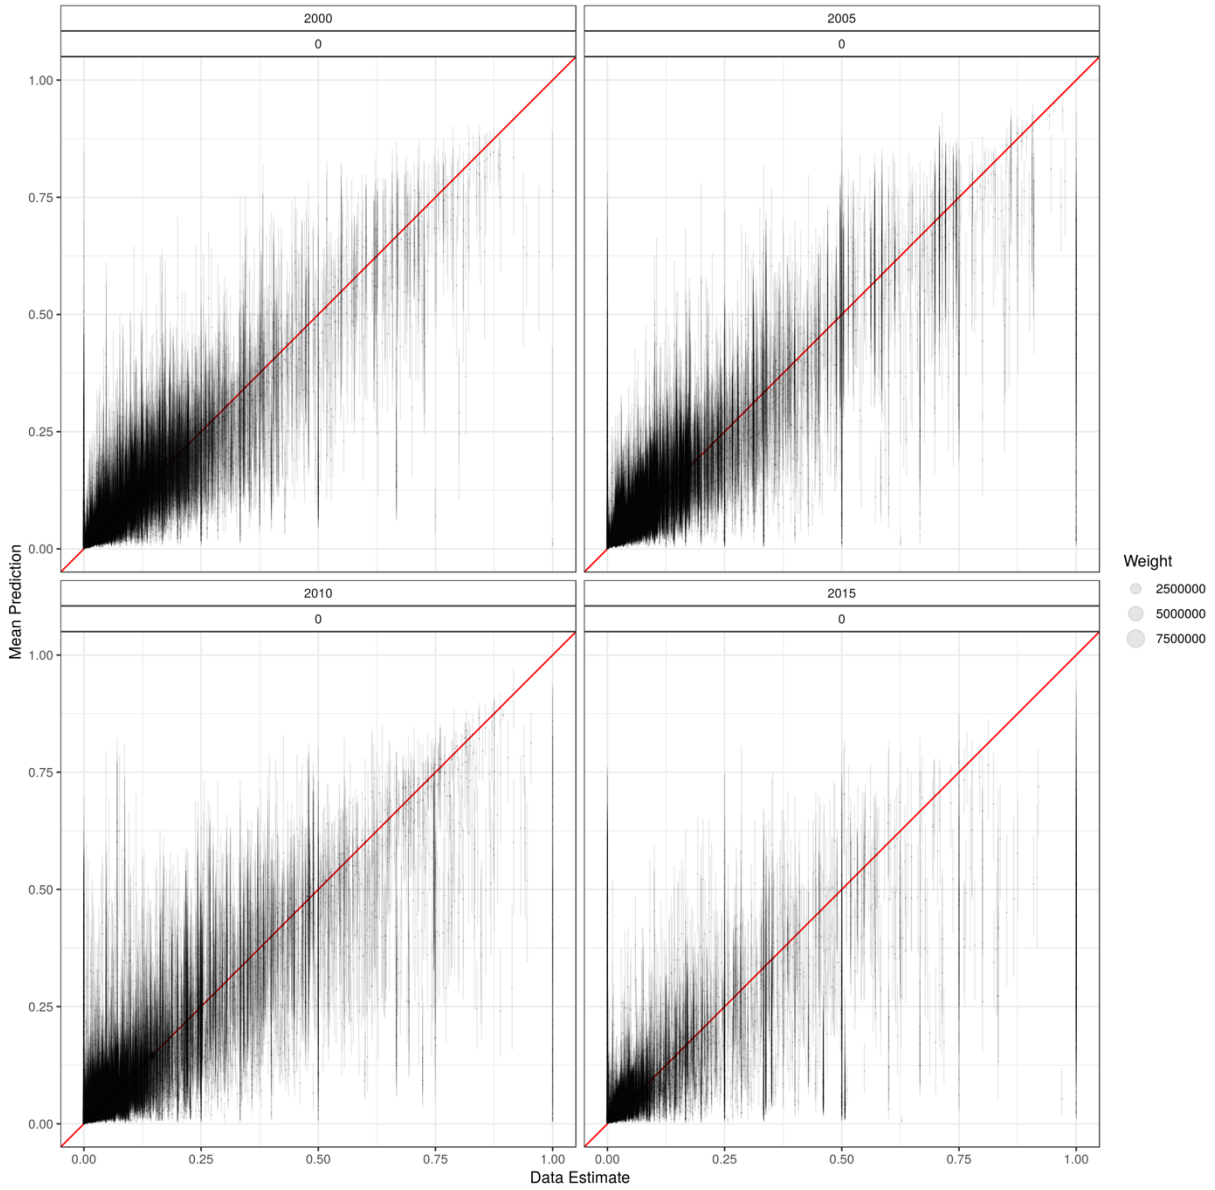

**Supplementary Figure 39. Zero years education (men, ages 20–24) admin 2 aggregation**  
Comparison of in-sample education predictions aggregated to admin 2 with 95% uncertainty intervals plotted against admin 1 aggregated data observations.

**Supplementary Table 28. In sample predictive metrics for 1–5 years of education (women, ages 15–49), aggregated to admin 0, admin 1, and admin 2**

| Aggregation | Year | Median SS  | Mean Err | RMSE   | Corr.  | 95% Cov. |
|-------------|------|------------|----------|--------|--------|----------|
| Admin 0     | 2000 | 9603.0000  | -0.0130  | 0.0244 | 0.9950 | 0.7946   |
| Admin 0     | 2005 | 11733.3631 | -0.0007  | 0.0061 | 0.9993 | 0.9291   |
| Admin 0     | 2010 | 12925.9901 | -0.0003  | 0.0027 | 0.9978 | 0.9842   |
| Admin 0     | 2015 | 11955.0000 | 0.0037   | 0.0071 | 0.9981 | 0.9422   |
| Admin 1     | 2000 | 911.0000   | -0.0130  | 0.0277 | 0.9927 | 0.7946   |
| Admin 1     | 2005 | 539.5000   | -0.0007  | 0.0132 | 0.9969 | 0.9291   |
| Admin 1     | 2010 | 821.0000   | -0.0003  | 0.0039 | 0.9963 | 0.9842   |
| Admin 1     | 2015 | 522.0000   | 0.0037   | 0.0127 | 0.9921 | 0.9422   |
| Admin 2     | 2000 | 95.0000    | -0.0130  | 0.0486 | 0.9643 | 0.7946   |
| Admin 2     | 2005 | 26.2430    | -0.0007  | 0.0319 | 0.9831 | 0.9291   |
| Admin 2     | 2010 | 34.0882    | -0.0003  | 0.0089 | 0.9824 | 0.9842   |
| Admin 2     | 2015 | 28.0000    | 0.0037   | 0.0317 | 0.9594 | 0.9422   |

**Supplementary Table 29. In sample predictive metrics for 1–5 years of education (men, ages 15–49), aggregated to admin 0, admin 1, and admin 2**

| Aggregation | Year | Median SS  | Mean Err | RMSE   | Corr.  | 95% Cov. |
|-------------|------|------------|----------|--------|--------|----------|
| Admin 0     | 2000 | 10184.9599 | -0.0137  | 0.0261 | 0.9963 | 0.7892   |
| Admin 0     | 2005 | 10867.2664 | -0.0003  | 0.0048 | 0.9996 | 0.9253   |
| Admin 0     | 2010 | 14125.0000 | 0.0000   | 0.0010 | 0.9994 | 0.9896   |
| Admin 0     | 2015 | 11661.0445 | 0.0035   | 0.0066 | 0.9959 | 0.9479   |
| Admin 1     | 2000 | 978.0000   | -0.0137  | 0.0303 | 0.9934 | 0.7892   |
| Admin 1     | 2005 | 553.6495   | -0.0003  | 0.0121 | 0.9974 | 0.9253   |
| Admin 1     | 2010 | 870.5000   | 0.0000   | 0.0020 | 0.9982 | 0.9896   |
| Admin 1     | 2015 | 569.0000   | 0.0035   | 0.0110 | 0.9898 | 0.9479   |
| Admin 2     | 2000 | 97.8408    | -0.0137  | 0.0530 | 0.9613 | 0.7892   |
| Admin 2     | 2005 | 25.7144    | -0.0003  | 0.0310 | 0.9844 | 0.9253   |
| Admin 2     | 2010 | 33.8747    | 0.0000   | 0.0053 | 0.9869 | 0.9896   |
| Admin 2     | 2015 | 27.7524    | 0.0035   | 0.0293 | 0.9465 | 0.9479   |

Validation Plot for edu\_no\_primary\_prop\_15\_49\_female by Country  
OOS: FALSE

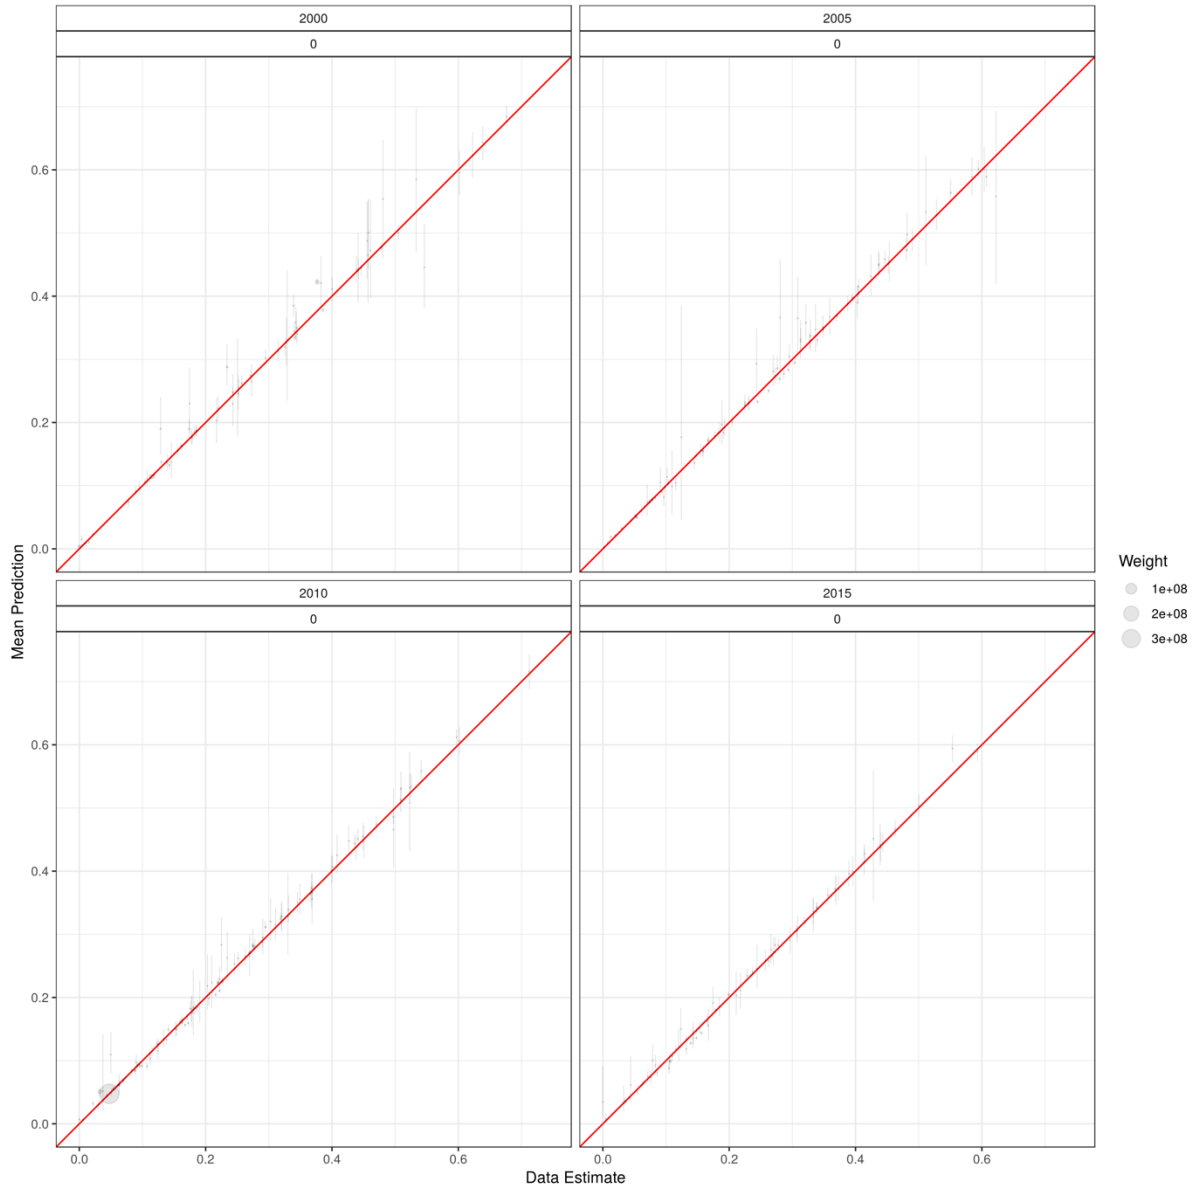

**Supplementary Figure 40. 1–5 years education (women, ages 15–49) admin 0 aggregation**  
Comparison of in-sample education predictions aggregated to admin 0 with 95% uncertainty intervals plotted against admin 1 aggregated data observations.

Validation Plot for edu\_no\_primary\_prop\_15\_49\_female by Admin 1  
OOS: FALSE

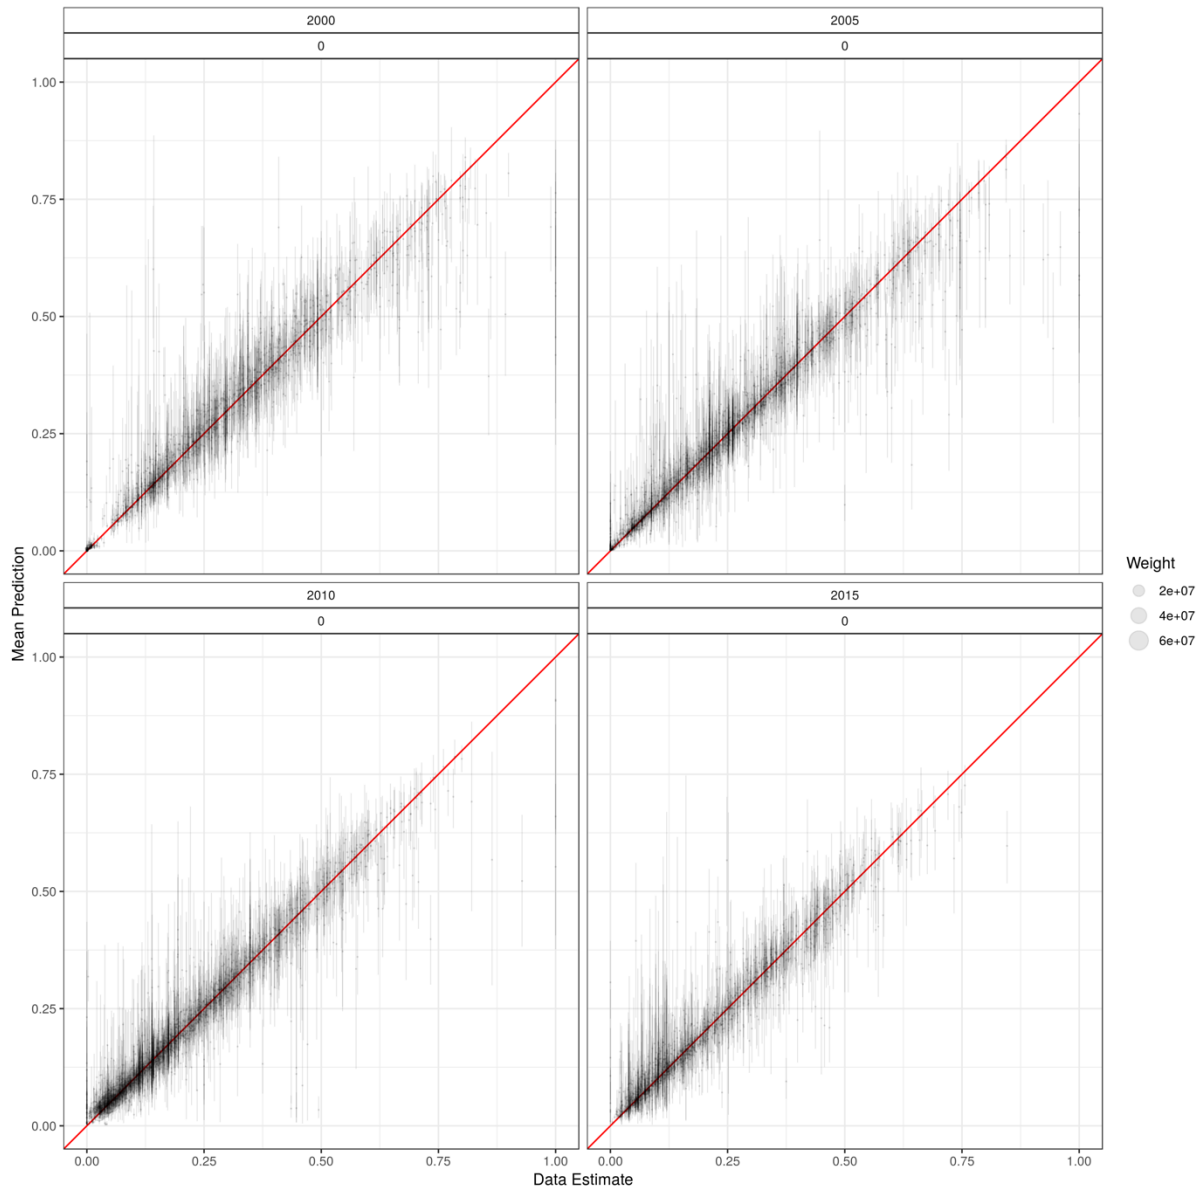

**Supplementary Figure 41. 1–5 years education (women, ages 15–49) admin 1 aggregation**  
Comparison of in-sample education predictions aggregated to admin 1 with 95% uncertainty intervals plotted against admin 1 aggregated data observations.

Validation Plot for edu\_no\_primary\_prop\_15\_49\_female by Admin 2  
OOS: FALSE

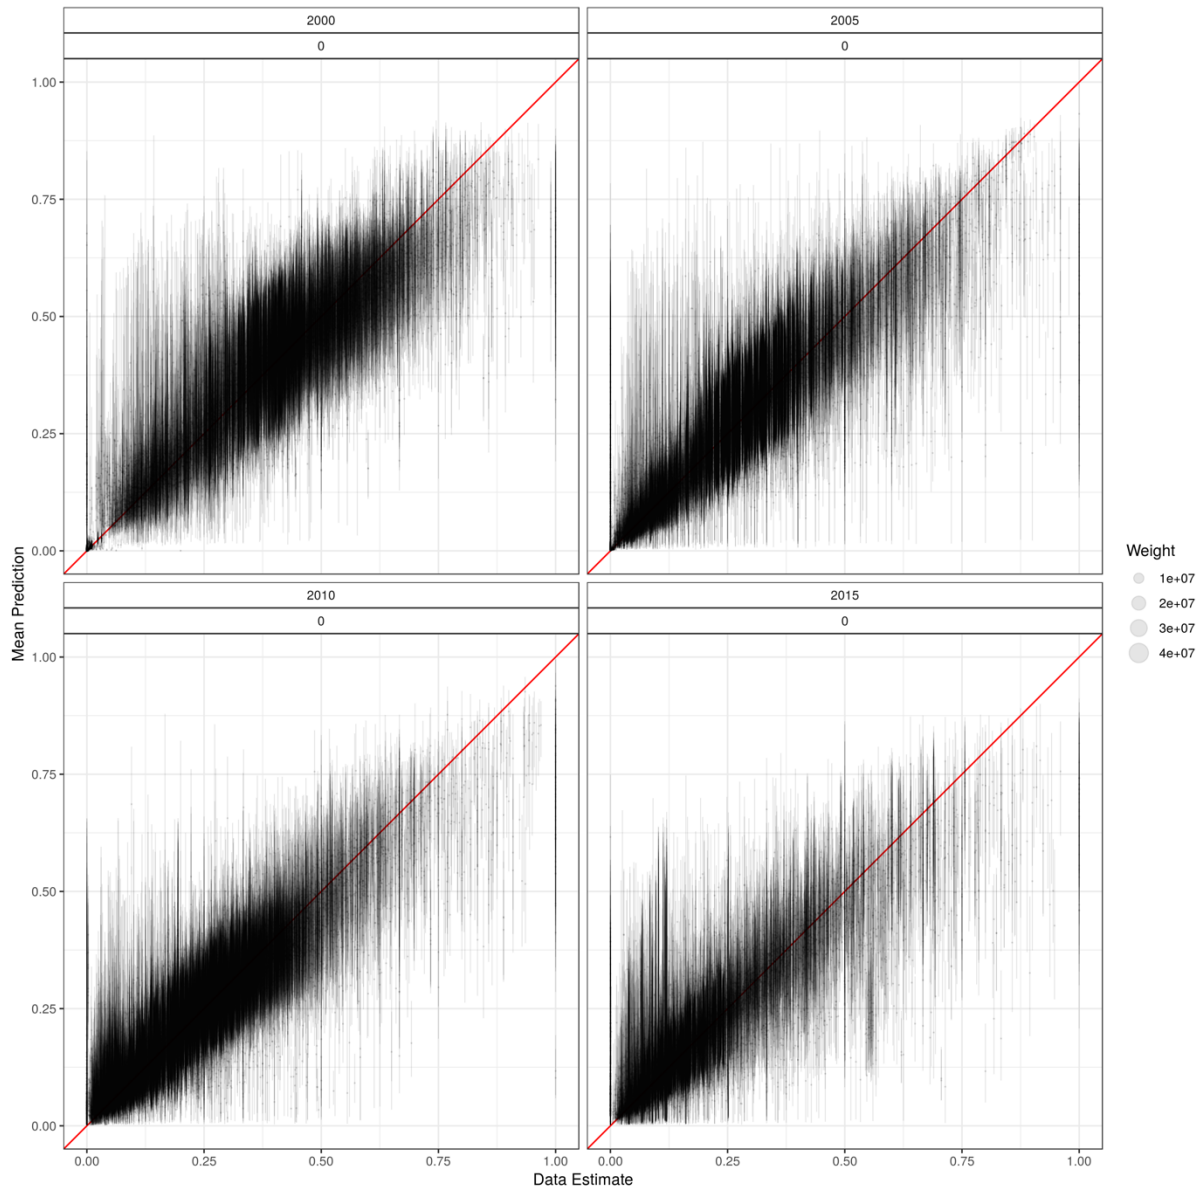

**Supplementary Figure 42. 1–5 years education (women, ages 15–49) admin 2 aggregation**  
Comparison of in-sample education predictions aggregated to admin 2 with 95% uncertainty intervals plotted against admin 1 aggregated data observations.

Validation Plot for edu\_no\_primary\_prop\_15\_49\_male by Country  
OOS: FALSE

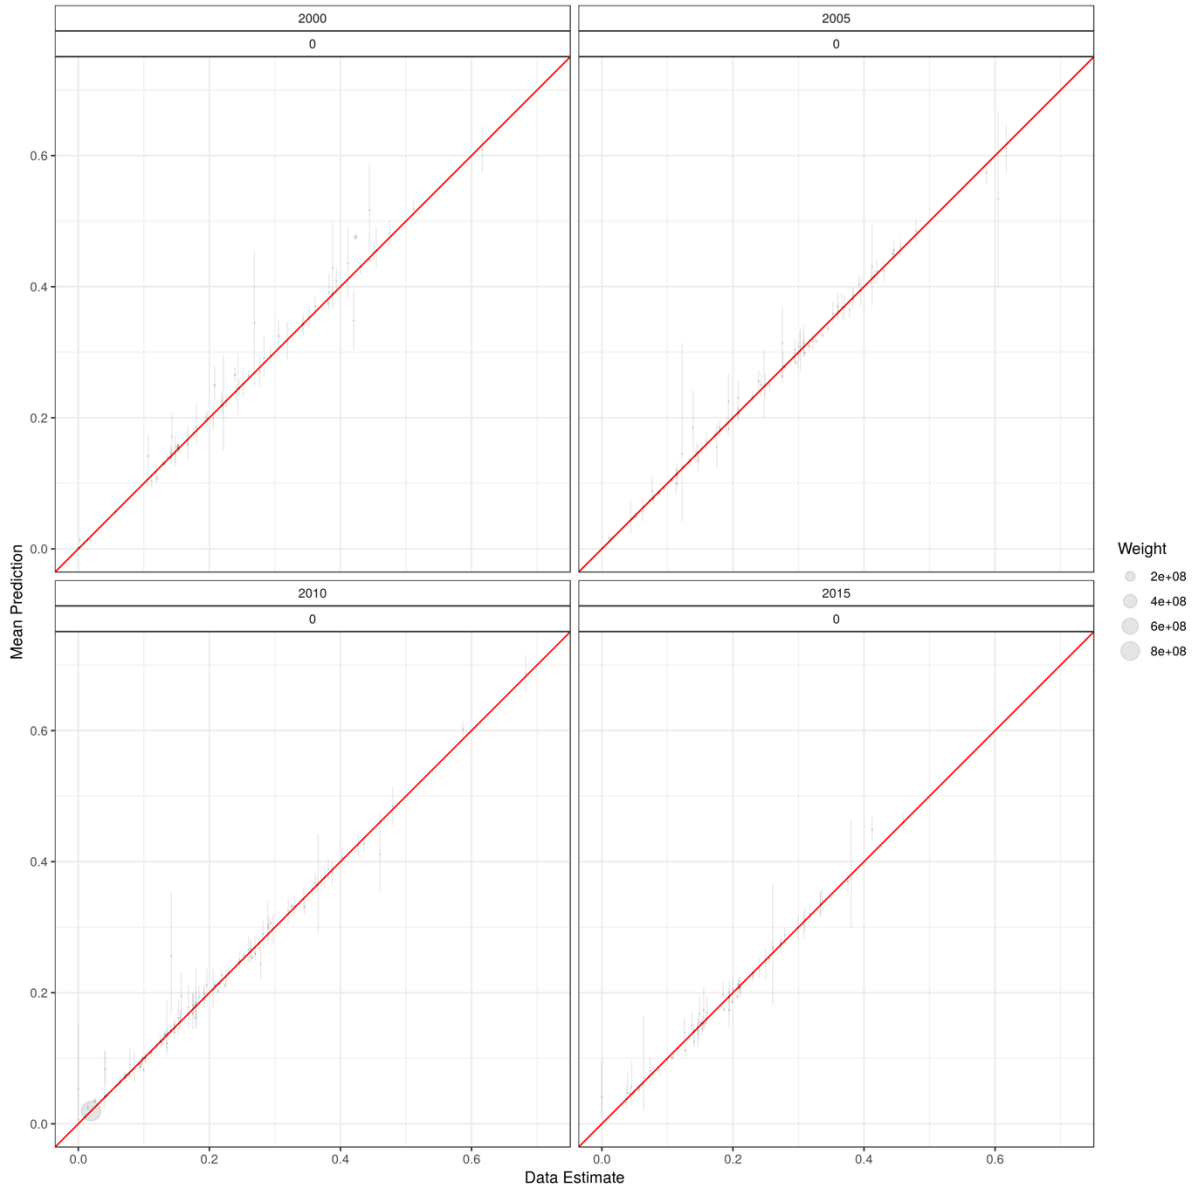

**Supplementary Figure 43. 1–5 years education (men, ages 15–49) admin 0 aggregation**  
Comparison of in-sample education predictions aggregated to admin 0 with 95% uncertainty intervals plotted against admin 1 aggregated data observations.

Validation Plot for edu\_no\_primary\_prop\_15\_49\_male by Admin 1  
OOS: FALSE

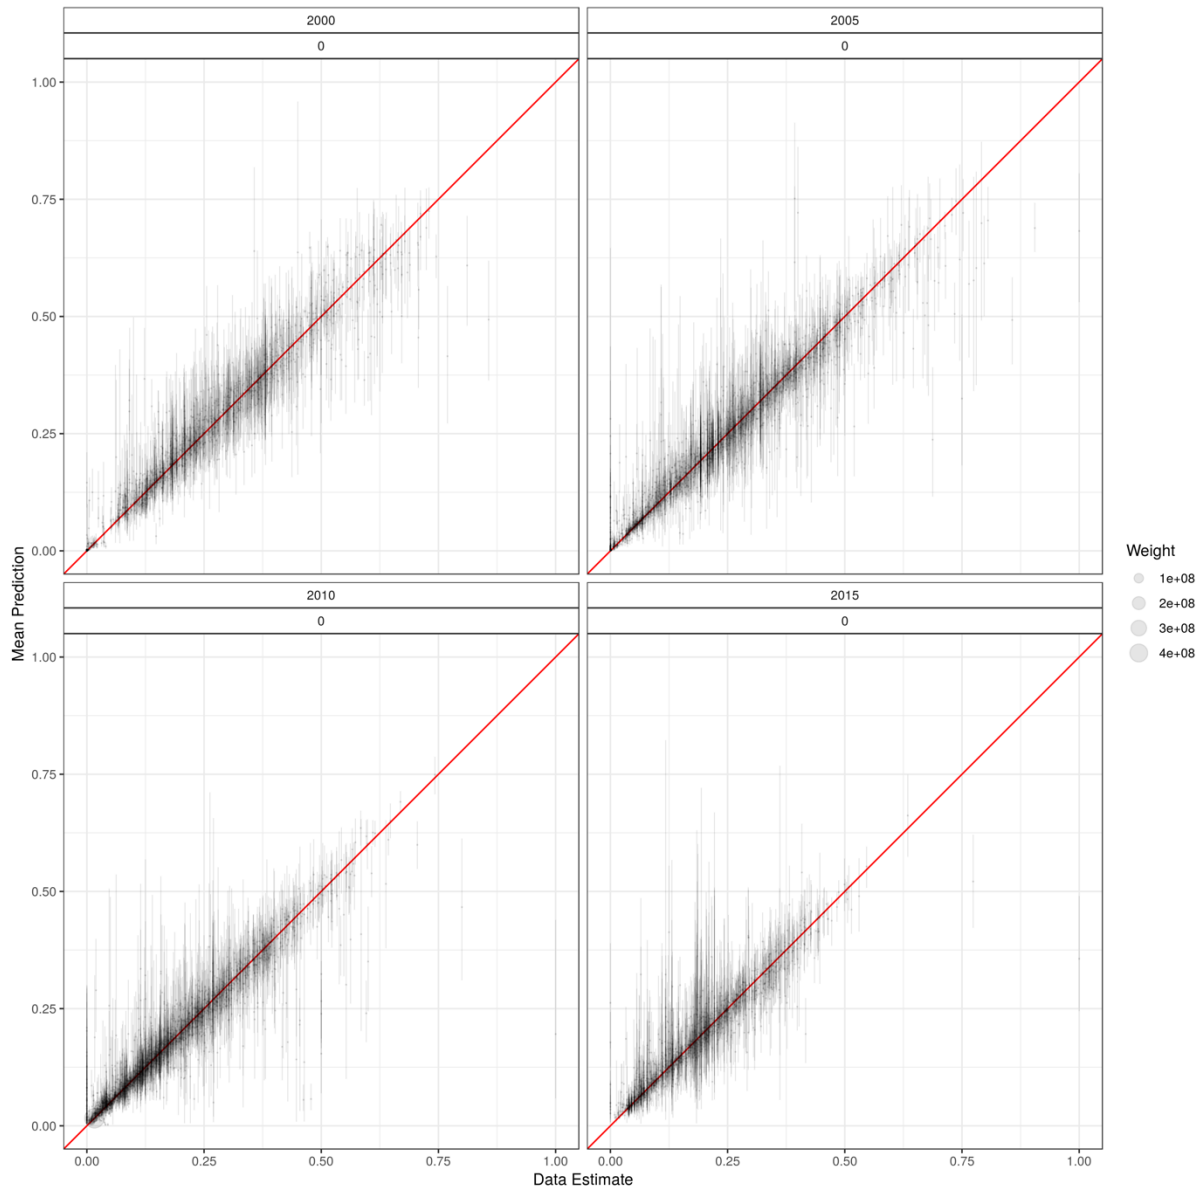

**Supplementary Figure 44. 1–5 years education (men, ages 15–49) admin 1 aggregation**  
Comparison of in-sample education predictions aggregated to admin 1 with 95% uncertainty intervals plotted against admin 1 aggregated data observations.

Validation Plot for edu\_no\_primary\_prop\_15\_49\_male by Admin 2  
OOS: FALSE

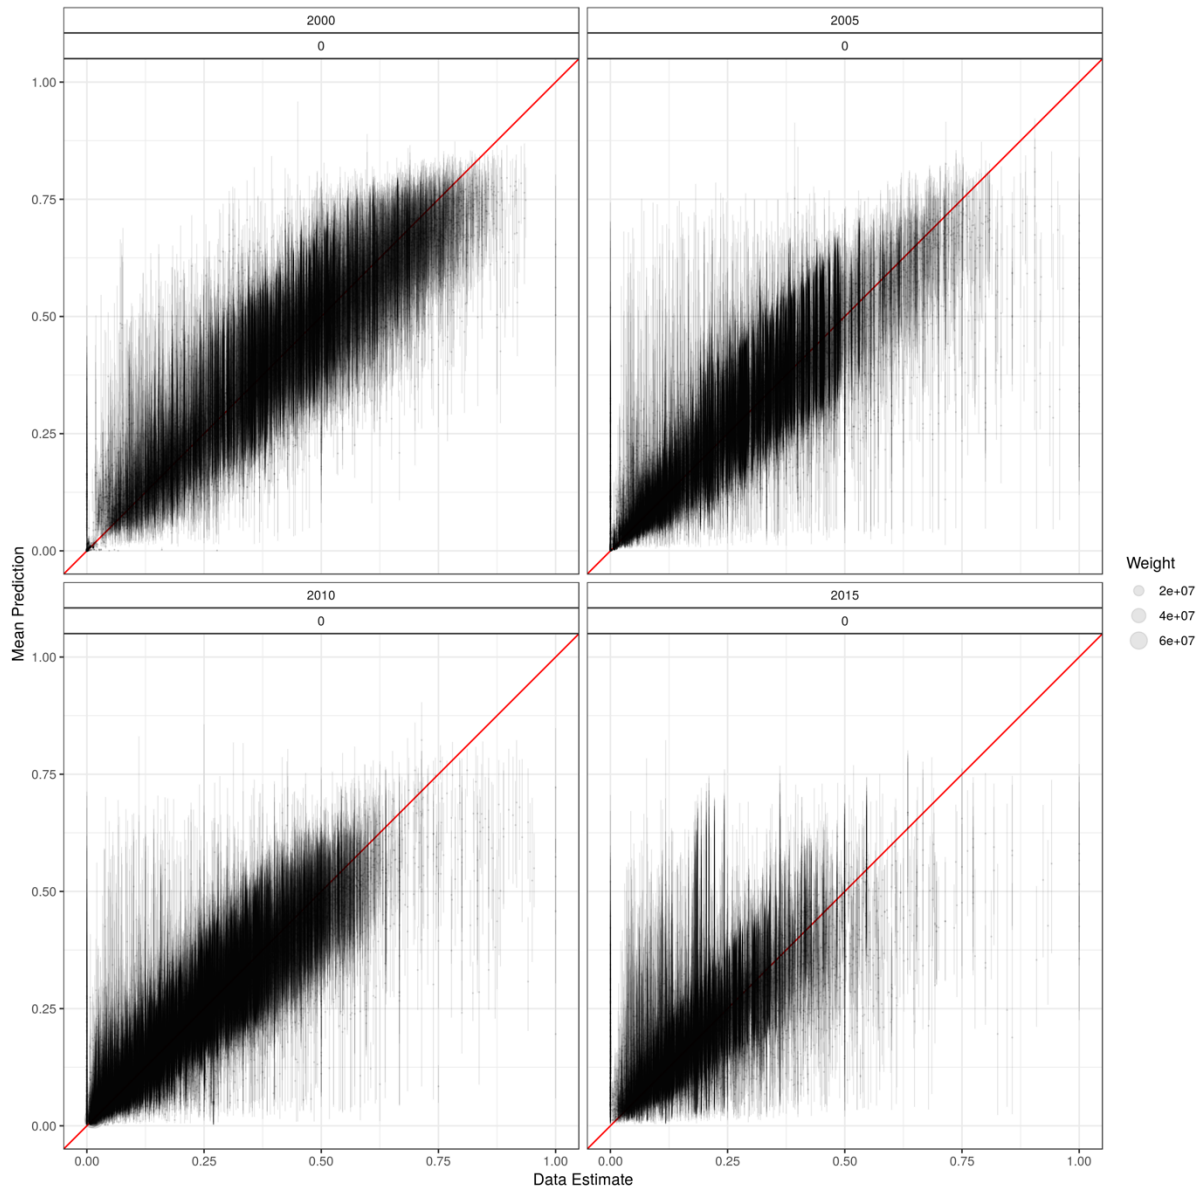

**Supplementary Figure 45. 1–5 years education (men, ages 15–49) admin 2 aggregation**  
Comparison of in-sample education predictions aggregated to admin 2 with 95% uncertainty intervals plotted against admin 1 aggregated data observations.



**Supplementary Table 30. In sample predictive metrics for 1–5 years of education (women, ages 20–24), aggregated to admin 0, admin 1, and admin 2**

| Aggregation | Year | Median SS | Mean Err | RMSE   | Corr.  | 95% Cov. |
|-------------|------|-----------|----------|--------|--------|----------|
| Admin 0     | 2000 | 1949.0000 | -0.0076  | 0.0144 | 0.9977 | 0.9188   |
| Admin 0     | 2005 | 2418.0000 | -0.0009  | 0.0045 | 0.9995 | 0.9308   |
| Admin 0     | 2010 | 2517.5000 | -0.0004  | 0.0009 | 0.9998 | 0.9696   |
| Admin 0     | 2015 | 2035.5557 | 0.0003   | 0.0025 | 0.9996 | 0.9546   |
| Admin 1     | 2000 | 175.0000  | -0.0076  | 0.0187 | 0.9951 | 0.9188   |
| Admin 1     | 2005 | 104.1411  | -0.0009  | 0.0142 | 0.9951 | 0.9308   |
| Admin 1     | 2010 | 143.0000  | -0.0004  | 0.0041 | 0.9985 | 0.9696   |
| Admin 1     | 2015 | 99.0000   | 0.0003   | 0.0148 | 0.9879 | 0.9546   |
| Admin 2     | 2000 | 17.0000   | -0.0076  | 0.0424 | 0.9654 | 0.9188   |
| Admin 2     | 2005 | 4.5759    | -0.0009  | 0.0359 | 0.9729 | 0.9308   |
| Admin 2     | 2010 | 5.4401    | -0.0004  | 0.0114 | 0.9885 | 0.9696   |
| Admin 2     | 2015 | 4.2984    | 0.0003   | 0.0383 | 0.9345 | 0.9546   |

**Supplementary Table 31. In sample predictive metrics for 1–5 years of education (men, ages 20–24), aggregated to admin 0, admin 1, and admin 2**

| Aggregation | Year | Median SS | Mean Err | RMSE   | Corr.  | 95% Cov. |
|-------------|------|-----------|----------|--------|--------|----------|
| Admin 0     | 2000 | 1899.0000 | -0.0092  | 0.0182 | 0.9981 | 0.9087   |
| Admin 0     | 2005 | 1911.0000 | -0.0006  | 0.0041 | 0.9995 | 0.9301   |
| Admin 0     | 2010 | 2453.0000 | 0.0009   | 0.0010 | 0.9999 | 0.8542   |
| Admin 0     | 2015 | 2151.7327 | 0.0007   | 0.0028 | 0.9989 | 0.9501   |
| Admin 1     | 2000 | 164.5000  | -0.0092  | 0.0227 | 0.9953 | 0.9087   |
| Admin 1     | 2005 | 100.8876  | -0.0006  | 0.0143 | 0.9945 | 0.9301   |
| Admin 1     | 2010 | 153.0000  | 0.0009   | 0.0025 | 0.9973 | 0.8542   |
| Admin 1     | 2015 | 100.5000  | 0.0007   | 0.0131 | 0.9819 | 0.9501   |
| Admin 2     | 2000 | 17.0000   | -0.0092  | 0.0486 | 0.9605 | 0.9087   |
| Admin 2     | 2005 | 4.4767    | -0.0006  | 0.0353 | 0.9712 | 0.9301   |
| Admin 2     | 2010 | 5.4210    | 0.0009   | 0.0060 | 0.9814 | 0.8542   |
| Admin 2     | 2015 | 4.0400    | 0.0007   | 0.0366 | 0.8956 | 0.9501   |

Validation Plot for edu\_no\_primary\_prop\_20\_24\_female by Country  
OOS: FALSE

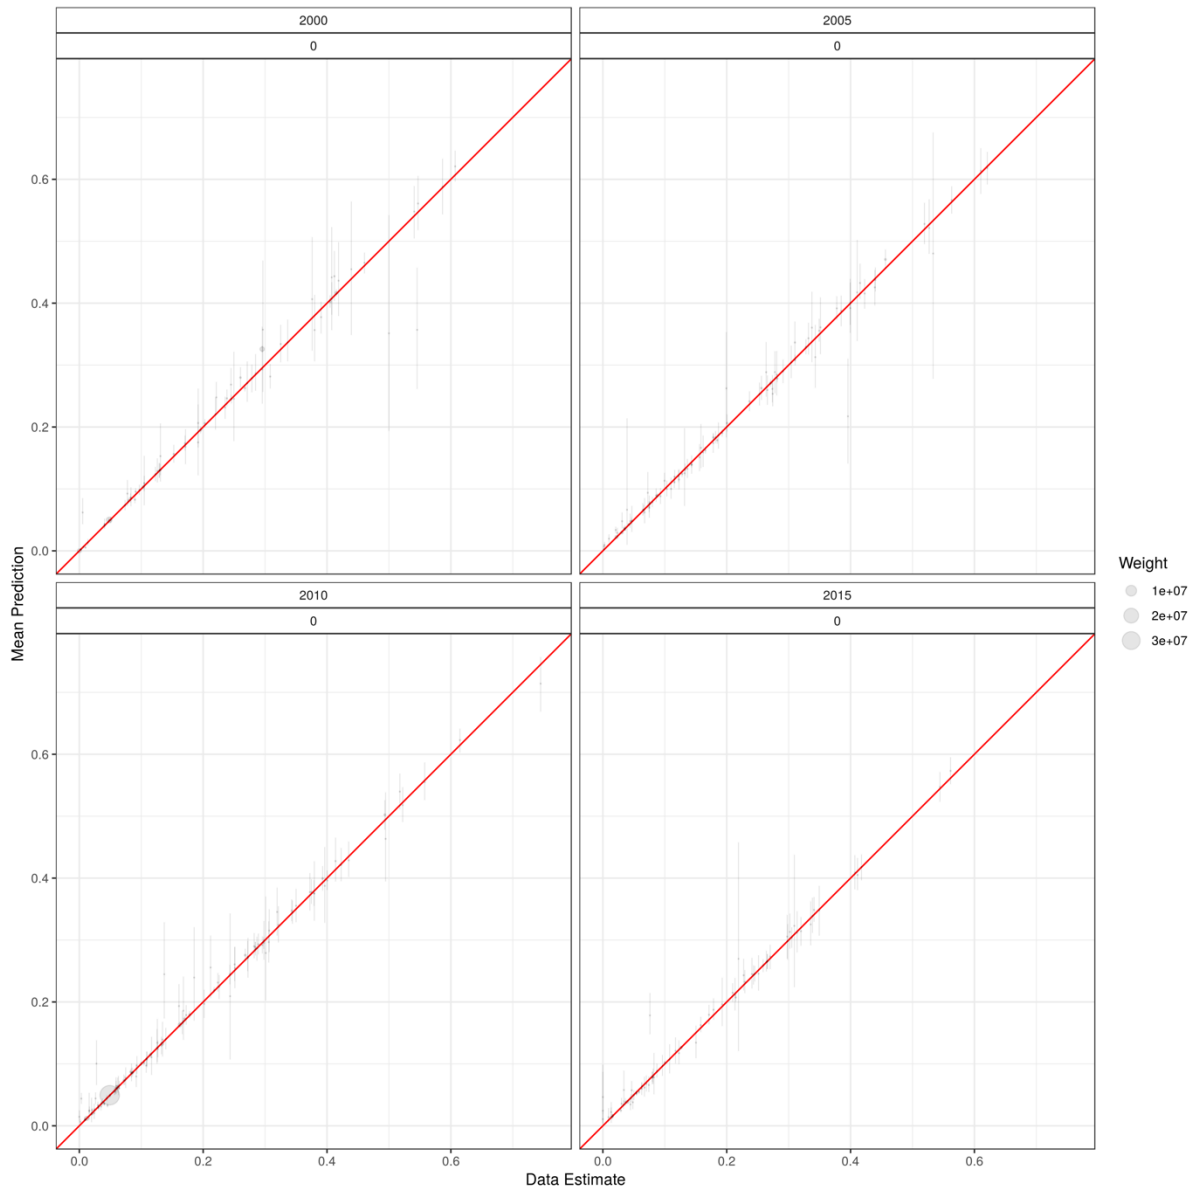

**Supplementary Figure 46. 1–5 years education (women, ages 20–24) admin 0 aggregation**  
Comparison of in-sample education predictions aggregated to admin 0 with 95% uncertainty intervals plotted against admin 1 aggregated data observations.

Validation Plot for edu\_no\_primary\_prop\_20\_24\_female by Admin 1  
OOS: FALSE

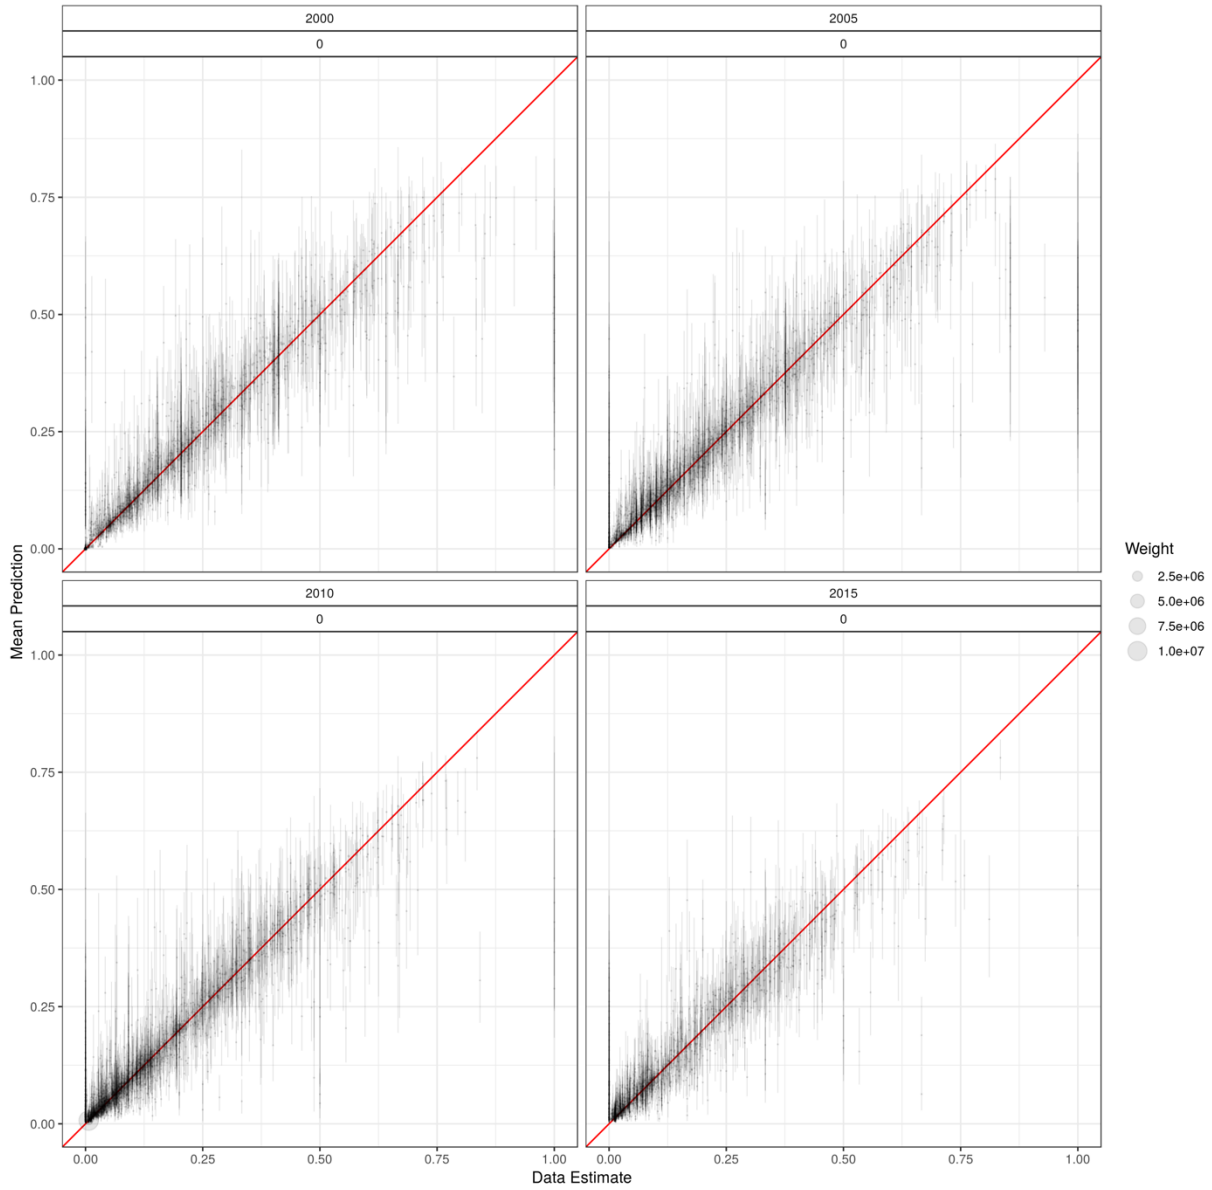

**Supplementary Figure 47. 1–5 years education (women, ages 20–24) admin 1 aggregation**  
Comparison of in-sample education predictions aggregated to admin 1 with 95% uncertainty intervals plotted against admin 1 aggregated data observations.

Validation Plot for edu\_no\_primary\_prop\_20\_24\_female by Admin 2  
OOS: FALSE

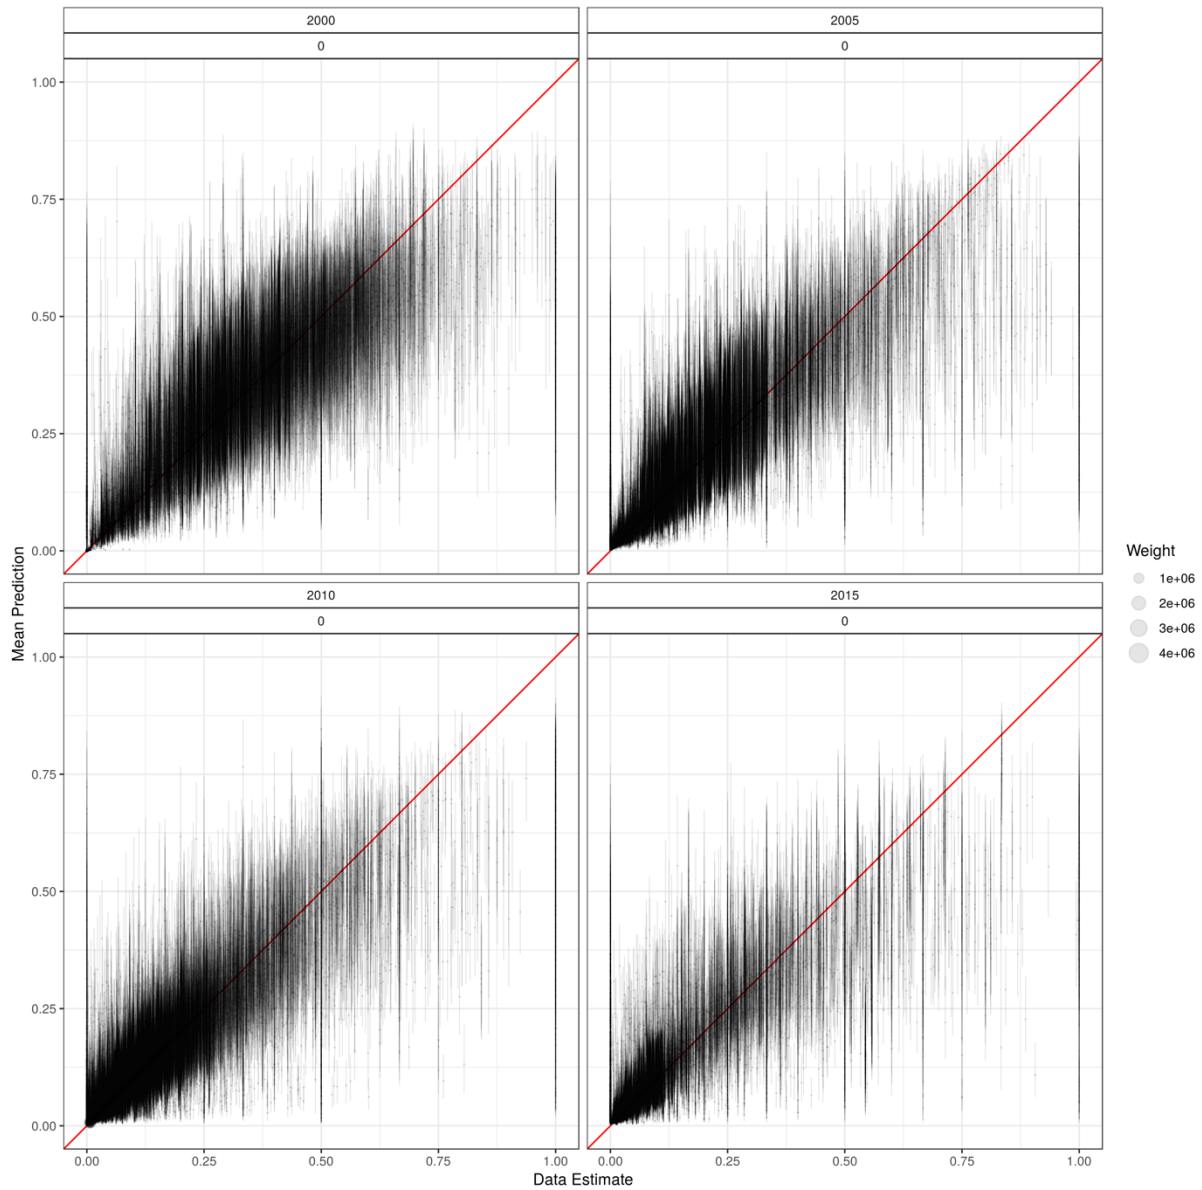

**Supplementary Figure 48. 1–5 years education (women, ages 20–24) admin 2 aggregation**  
Comparison of in-sample education predictions aggregated to admin 2 with 95% uncertainty intervals plotted against admin 1 aggregated data observations.

Validation Plot for edu\_no\_primary\_prop\_20\_24\_male by Country  
OOS: FALSE

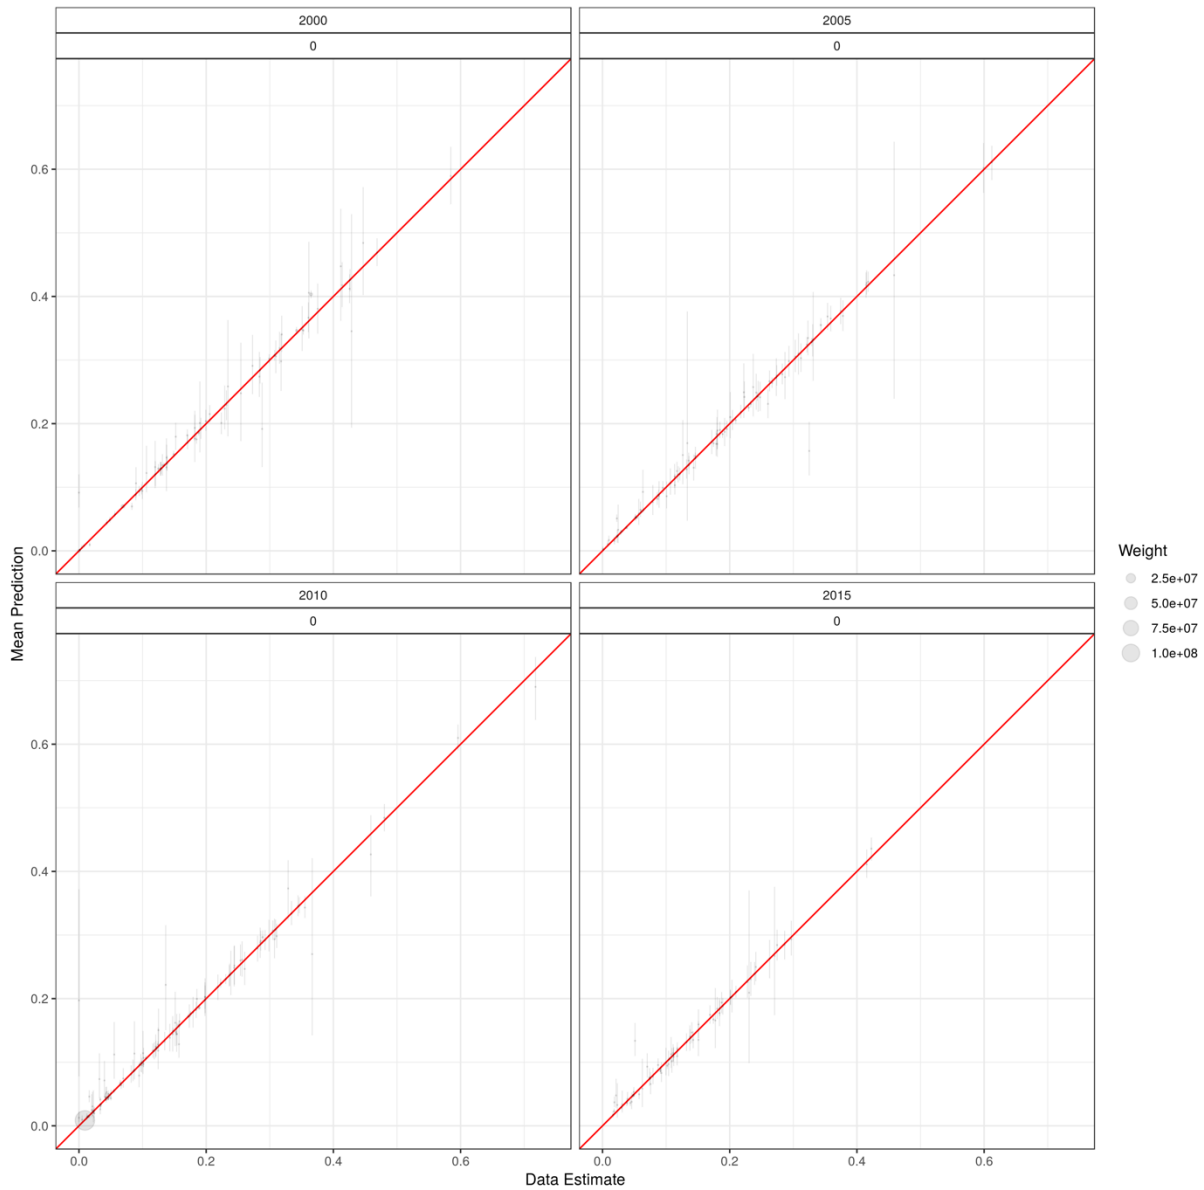

**Supplementary Figure 49. 1–5 years education (men, ages 20–24) admin 0 aggregation**  
Comparison of in-sample education predictions aggregated to admin 0 with 95% uncertainty intervals plotted against admin 1 aggregated data observations.

Validation Plot for edu\_no\_primary\_prop\_20\_24\_male by Admin 1  
OOS: FALSE

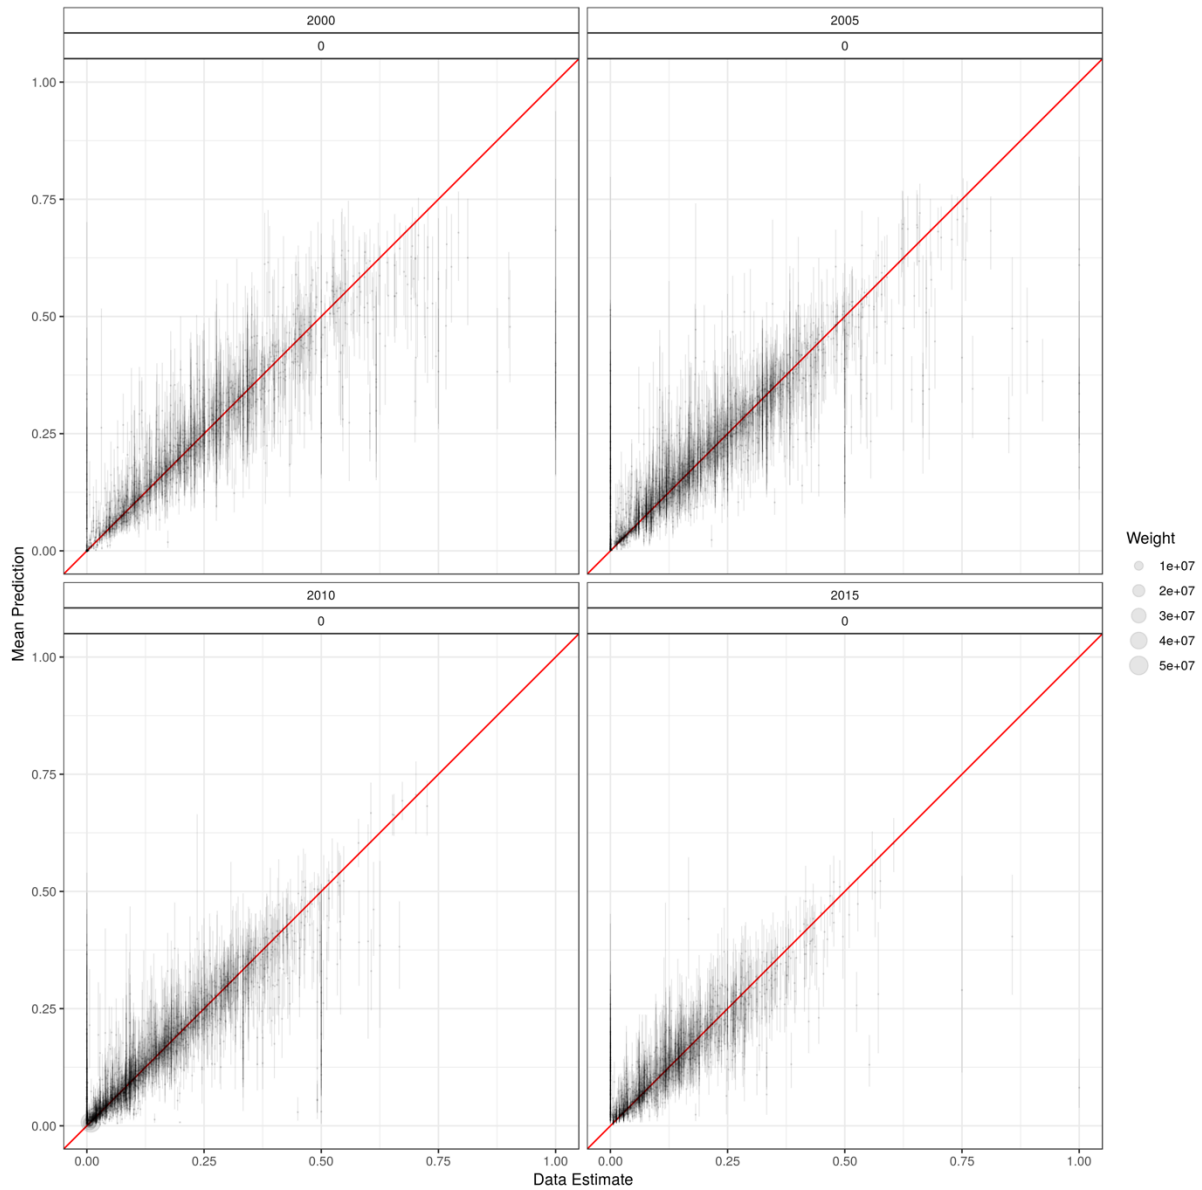

**Supplementary Figure 50. 1–5 years education (men, ages 20–24) admin 1 aggregation**

Comparison of in-sample education predictions aggregated to admin 1 with 95% uncertainty intervals plotted against admin 1 aggregated data observations.

Validation Plot for edu\_no\_primary\_prop\_20\_24\_male by Admin 2  
OOS: FALSE

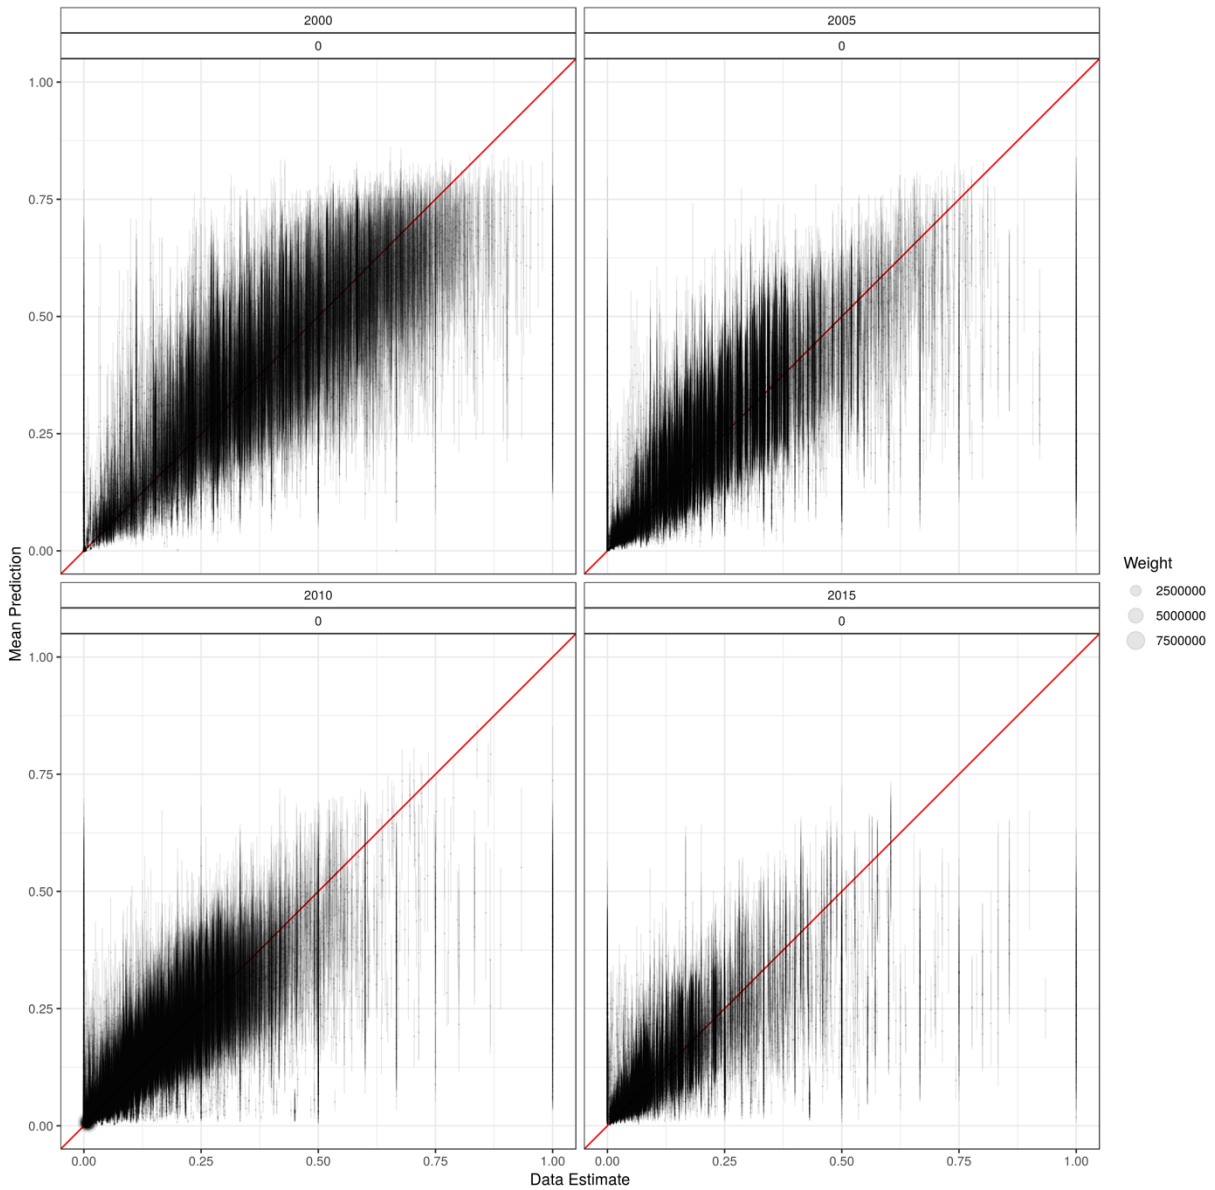

**Supplementary Figure 51. 1–5 years education (men, ages 20–24) admin 2 aggregation**  
Comparison of in-sample education predictions aggregated to admin 2 with 95% uncertainty intervals plotted against admin 1 aggregated data observations.

**Supplementary Table 32. In sample predictive metrics for 6–11 years of education (women, ages 15–49), aggregated to admin 0, admin 1, and admin 2**

| Aggregation | Year | Median SS | Mean Err | RMSE   | Corr.  | 95% Cov. |
|-------------|------|-----------|----------|--------|--------|----------|
| Admin 0     | 2000 | 8013.0000 | -0.0028  | 0.0246 | 0.9766 | 0.7954   |
| Admin 0     | 2005 | 8303.5776 | -0.0159  | 0.0229 | 0.9946 | 0.9227   |
| Admin 0     | 2010 | 9281.6587 | 0.0029   | 0.0038 | 0.9986 | 0.9863   |
| Admin 0     | 2015 | 9057.9153 | -0.0074  | 0.0091 | 0.9988 | 0.9494   |
| Admin 1     | 2000 | 689.4149  | -0.0028  | 0.0317 | 0.9679 | 0.7954   |
| Admin 1     | 2005 | 386.0000  | -0.0159  | 0.0309 | 0.9853 | 0.9227   |
| Admin 1     | 2010 | 612.0000  | 0.0029   | 0.0066 | 0.9927 | 0.9863   |
| Admin 1     | 2015 | 385.0104  | -0.0074  | 0.0157 | 0.9941 | 0.9494   |
| Admin 2     | 2000 | 60.1334   | -0.0028  | 0.0465 | 0.9405 | 0.7954   |
| Admin 2     | 2005 | 19.3895   | -0.0159  | 0.0569 | 0.9401 | 0.9227   |
| Admin 2     | 2010 | 28.0000   | 0.0029   | 0.0126 | 0.9722 | 0.9863   |
| Admin 2     | 2015 | 22.9372   | -0.0074  | 0.0495 | 0.9487 | 0.9494   |

**Supplementary Table 33. In sample predictive metrics for 6–11 years of education (men, ages 15–49), aggregated to admin 0, admin 1, and admin 2**

| Aggregation | Year | Median SS  | Mean Err | RMSE   | Corr.   | 95% Cov. |
|-------------|------|------------|----------|--------|---------|----------|
| Admin 0     | 2000 | 7186.2870  | -0.0564  | 0.0738 | 0.8947  | 0.5447   |
| Admin 0     | 2005 | 7755.3660  | -0.0758  | 0.0929 | 0.9238  | 0.5910   |
| Admin 0     | 2010 | 10720.3243 | 0.0908   | 0.0948 | -0.1162 | 0.6381   |
| Admin 0     | 2015 | 9095.5051  | -0.0616  | 0.0826 | 0.8499  | 0.6543   |
| Admin 1     | 2000 | 669.0000   | -0.0564  | 0.0948 | 0.7626  | 0.5447   |
| Admin 1     | 2005 | 347.4343   | -0.0758  | 0.1177 | 0.8029  | 0.5910   |
| Admin 1     | 2010 | 622.0000   | 0.0908   | 0.1083 | -0.1640 | 0.6381   |
| Admin 1     | 2015 | 477.9025   | -0.0616  | 0.1106 | 0.6712  | 0.6543   |
| Admin 2     | 2000 | 56.0000    | -0.0564  | 0.1179 | 0.6403  | 0.5447   |
| Admin 2     | 2005 | 18.1650    | -0.0758  | 0.1463 | 0.6816  | 0.5910   |
| Admin 2     | 2010 | 28.3070    | 0.0908   | 0.1337 | -0.0772 | 0.6381   |
| Admin 2     | 2015 | 24.0000    | -0.0616  | 0.1493 | 0.4812  | 0.6543   |



Validation Plot for edu\_primary\_prop\_15\_49\_female by Country  
OOS: FALSE

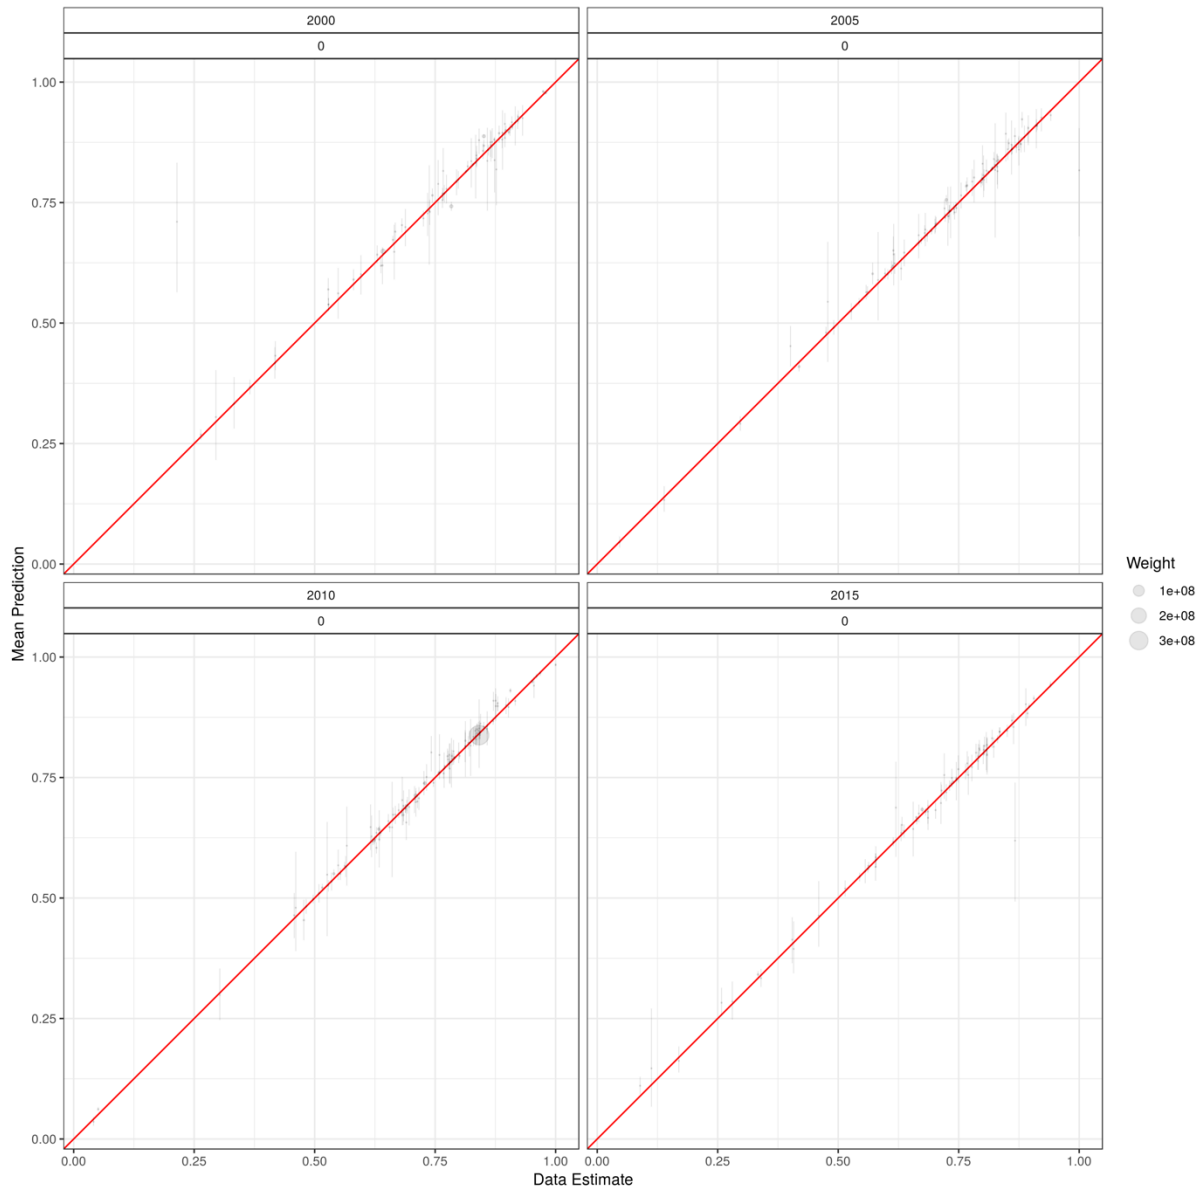

**Supplementary Figure 52. 6–11 years education (women, ages 15–49) admin 0 aggregation**  
Comparison of in-sample education predictions aggregated to admin 0 with 95% uncertainty intervals plotted against admin 1 aggregated data observations.

Validation Plot for edu\_primary\_prop\_15\_49\_female by Admin 1  
OOS: FALSE

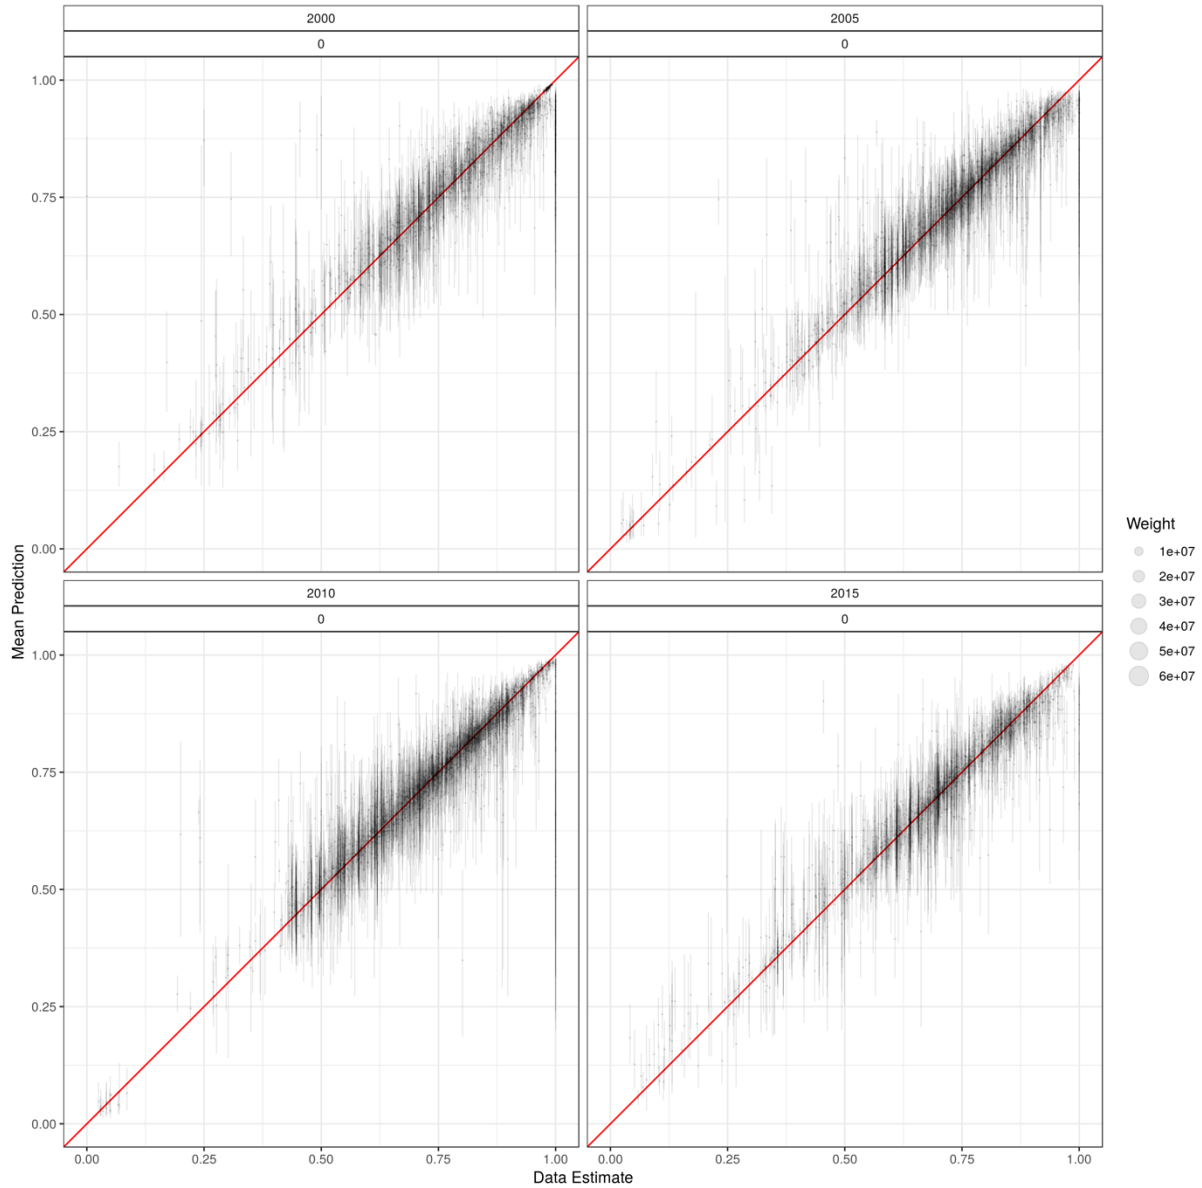

**Supplementary Figure 53. 6–11 years education (women, ages 15–49) admin 1 aggregation**  
Comparison of in-sample education predictions aggregated to admin 1 with 95% uncertainty intervals plotted against admin 1 aggregated data observations.

Validation Plot for edu\_primary\_prop\_15\_49\_female by Admin 2  
OOS: FALSE

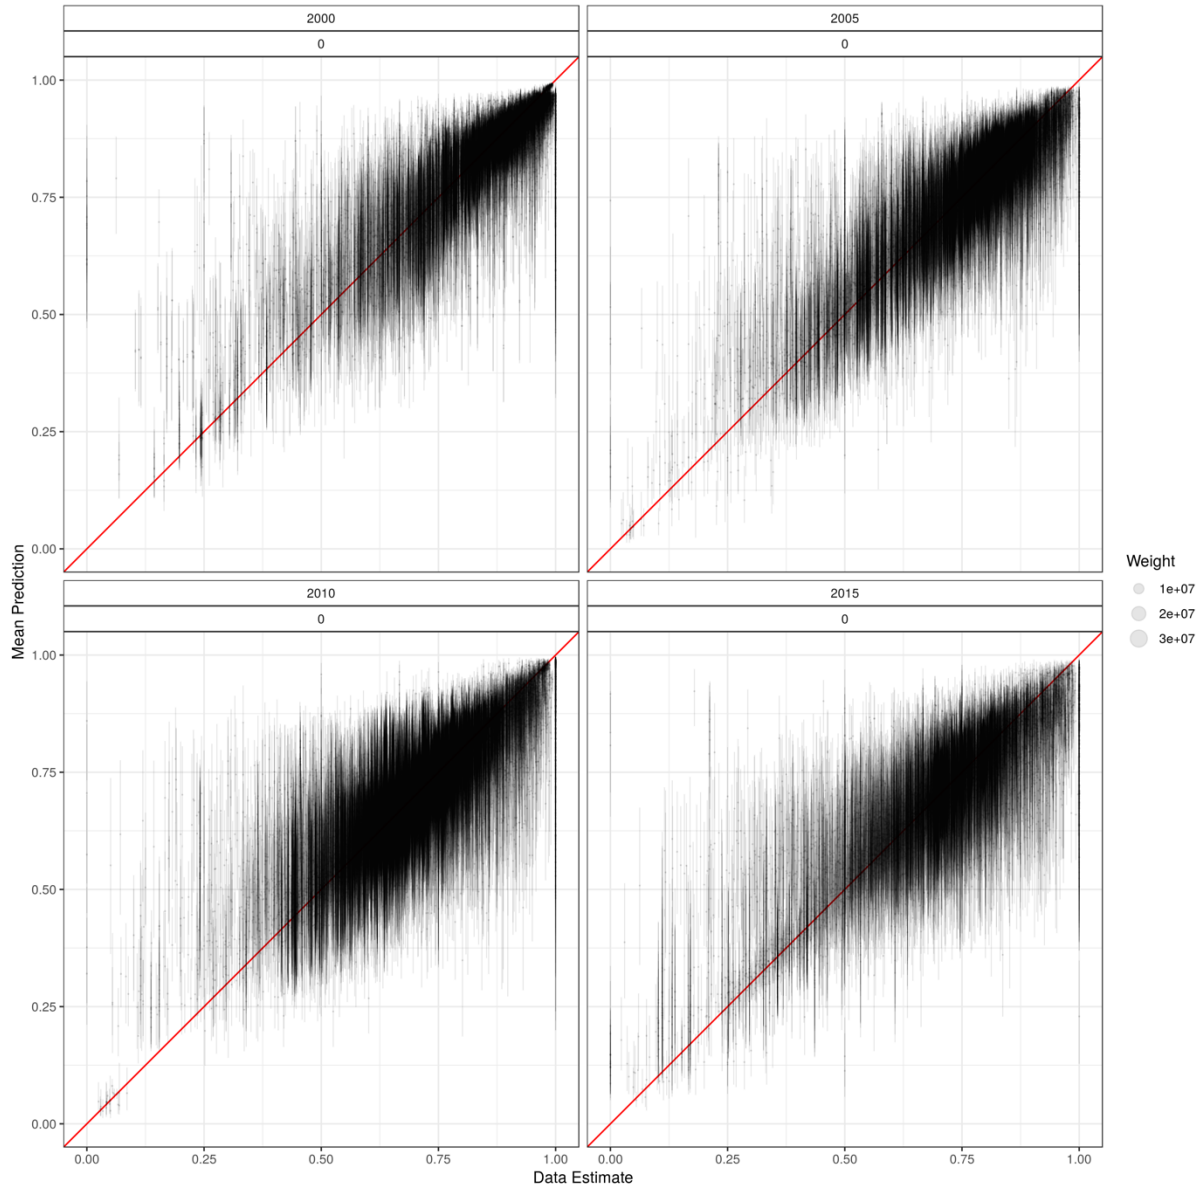

**Supplementary Figure 54. 6–11 years education (women, ages 15–49) admin 2 aggregation**  
Comparison of in-sample education predictions aggregated to admin 2 with 95% uncertainty intervals plotted against admin 1 aggregated data observations.

Validation Plot for edu\_primary\_prop\_15\_49\_male by Country  
OOS: FALSE

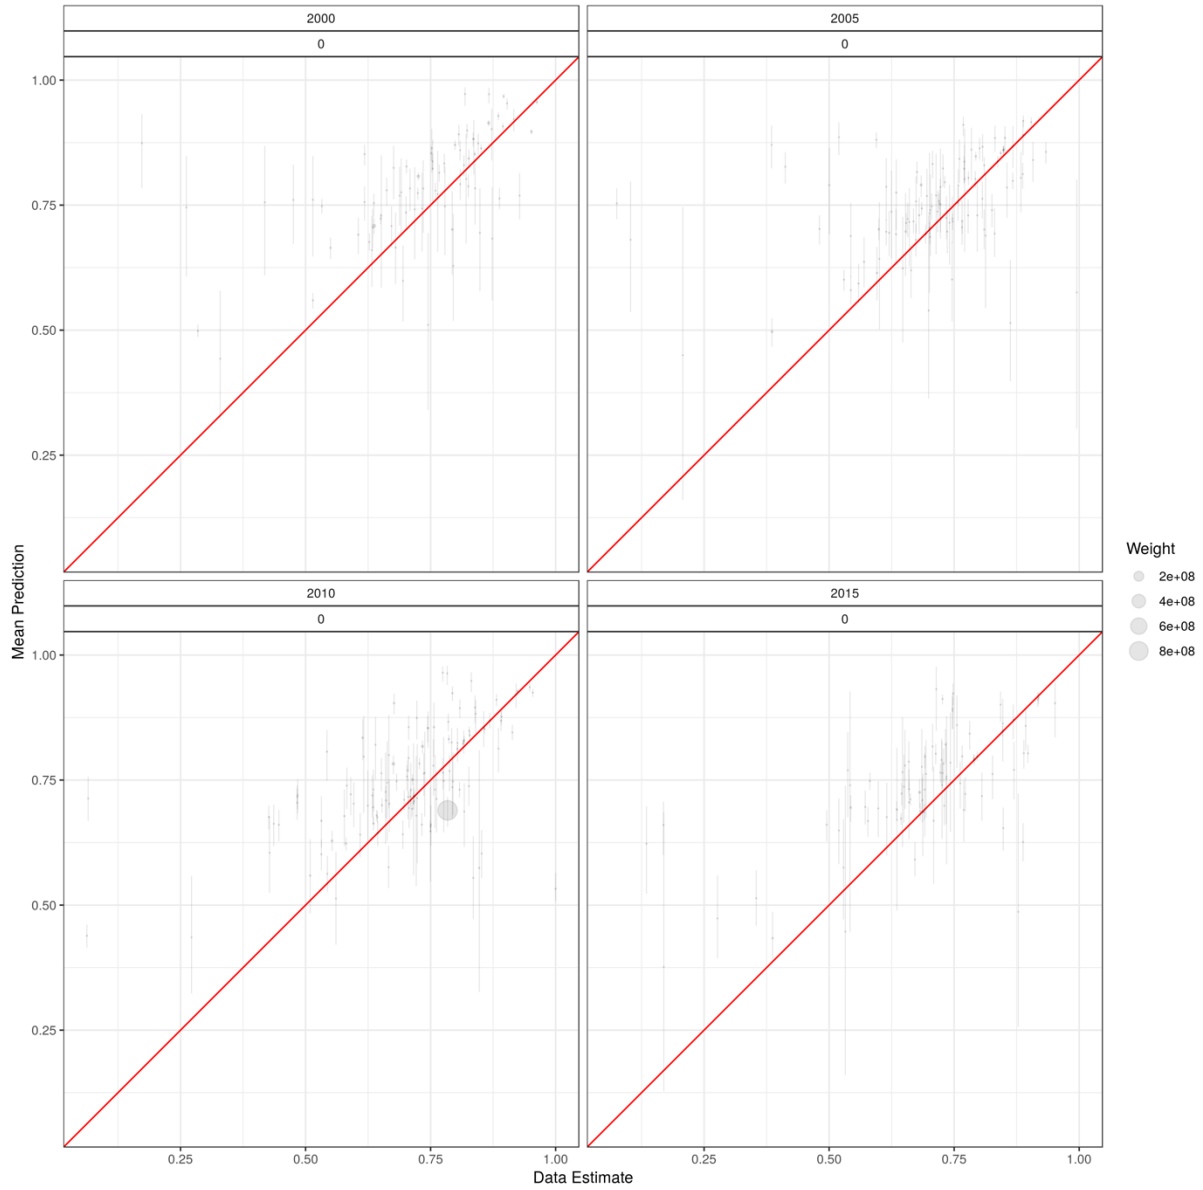

**Supplementary Figure 55. 6–11 years education (men, ages 15–49) admin 2 aggregation**  
Comparison of in-sample education predictions aggregated to admin 2 with 95% uncertainty intervals plotted against admin 1 aggregated data observations.

Validation Plot for edu\_primary\_prop\_15\_49\_male by Admin 1  
OOS: FALSE

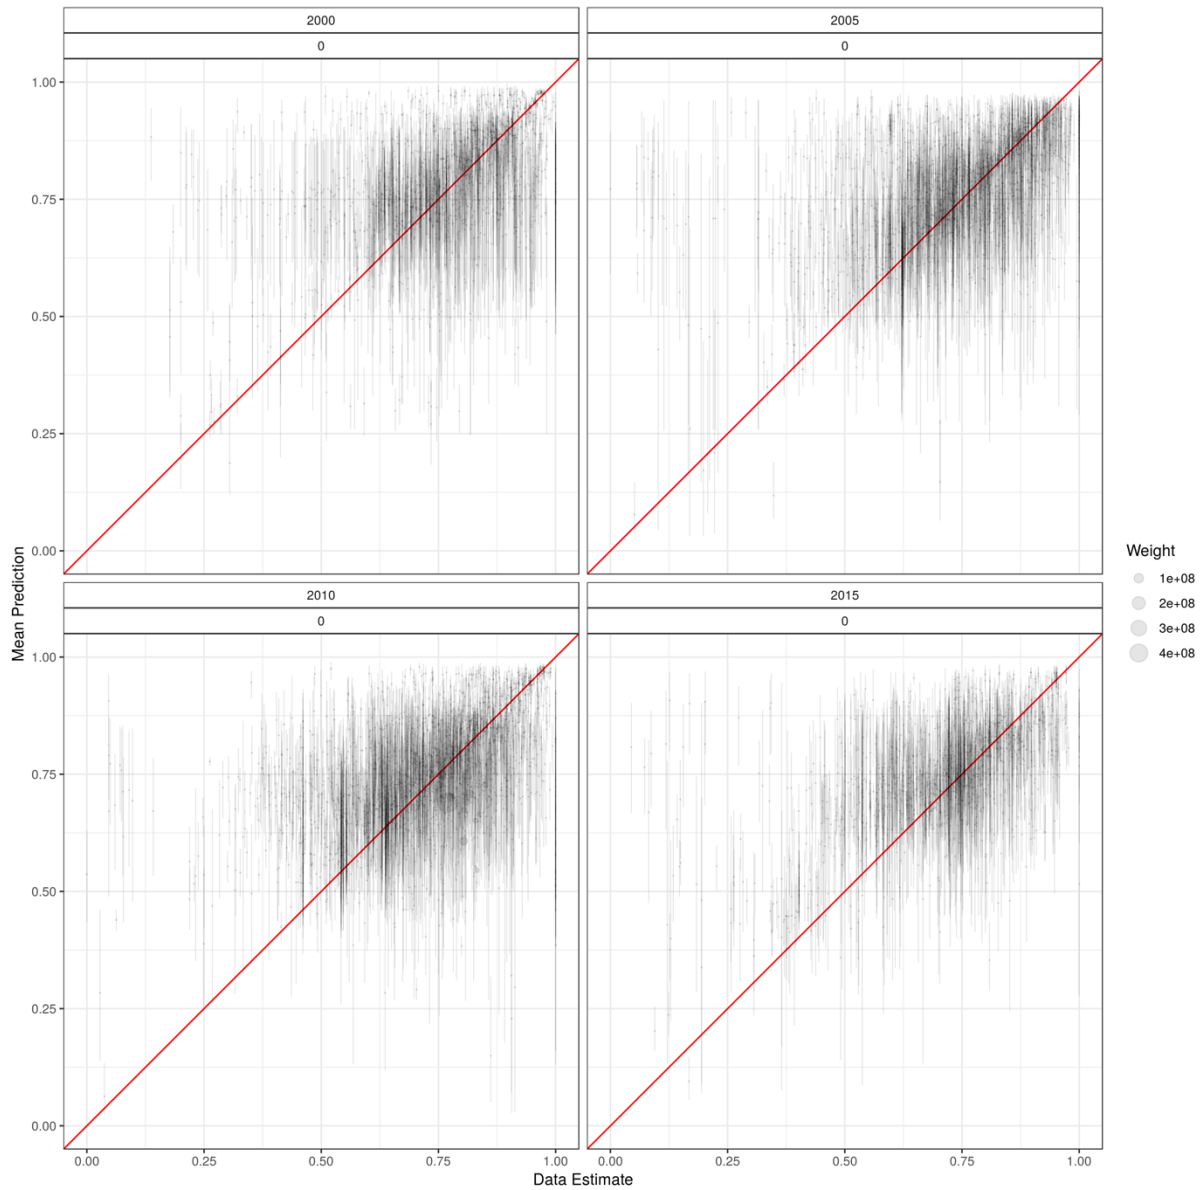

**Supplementary Figure 56. 6–11 years education (men, ages 15–49) admin 2 aggregation**  
Comparison of in-sample education predictions aggregated to admin 2 with 95% uncertainty intervals plotted against admin 1 aggregated data observations.

Validation Plot for edu\_primary\_prop\_15\_49\_male by Admin 2  
OOS: FALSE

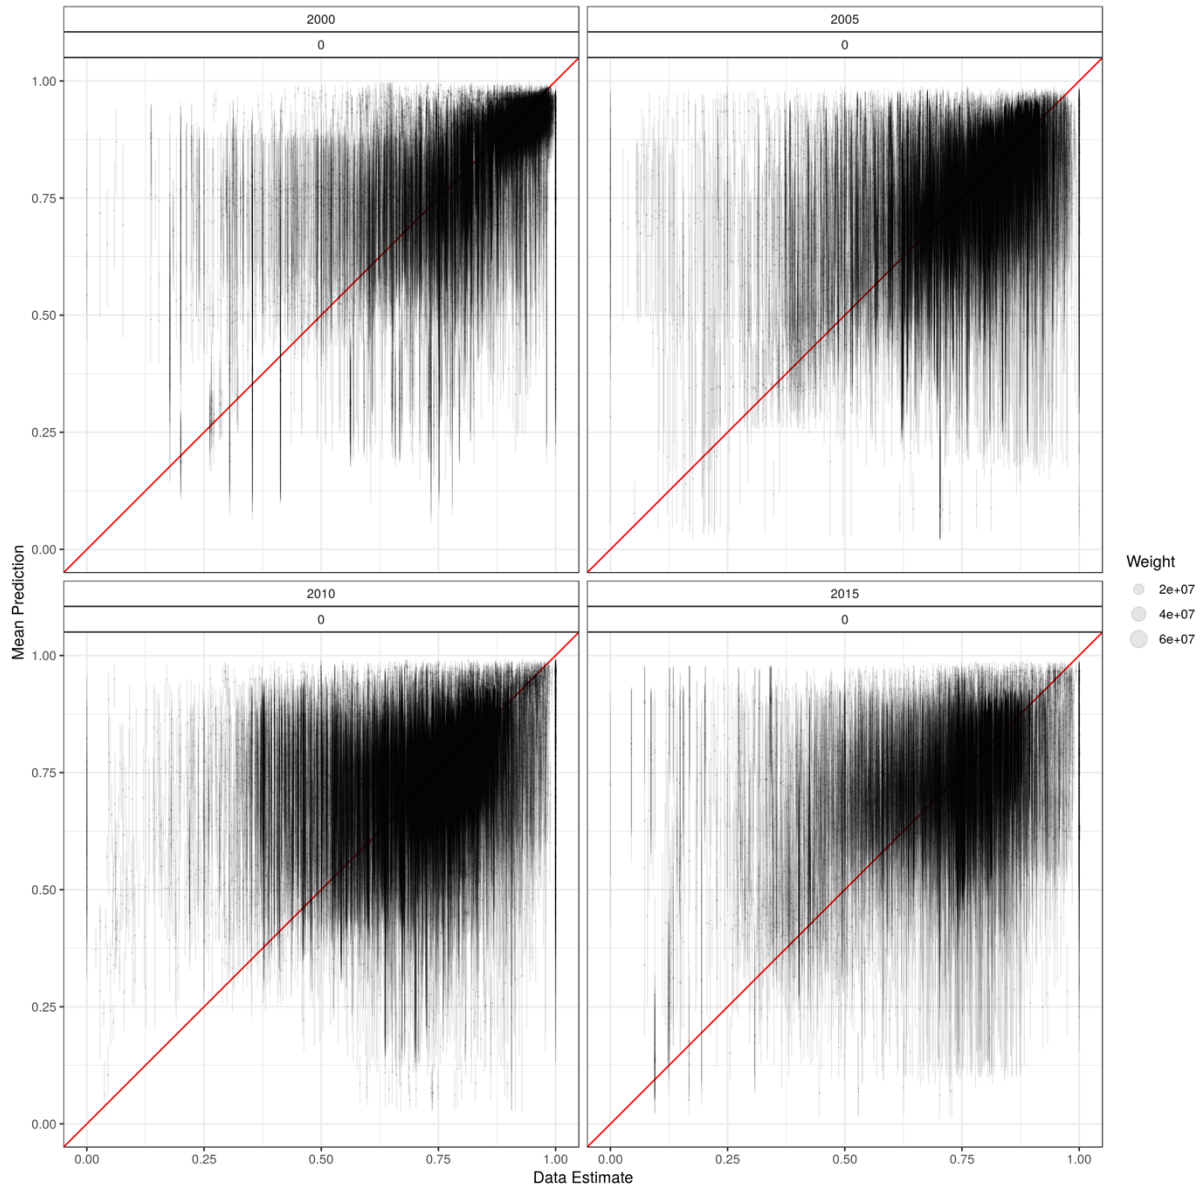

**Supplementary Figure 57. 6–11 years education (men, ages 15–49) admin 2 aggregation**  
Comparison of in-sample education predictions aggregated to admin 2 with 95% uncertainty intervals plotted against admin 1 aggregated data observations.

**Supplementary Table 34. In sample predictive metrics for 6–11 years of education (women, ages 20–24), aggregated to admin 0, admin 1, and admin 2**

| Aggregation | Year | Median SS | Mean Err | RMSE   | Corr.  | 95% Cov. |
|-------------|------|-----------|----------|--------|--------|----------|
| Admin 0     | 2000 | 1693.0779 | -0.0047  | 0.0136 | 0.9971 | 0.8695   |
| Admin 0     | 2005 | 1661.0000 | -0.0103  | 0.0163 | 0.9949 | 0.9396   |
| Admin 0     | 2010 | 1981.4157 | 0.0012   | 0.0030 | 0.9995 | 0.9536   |
| Admin 0     | 2015 | 1642.0670 | -0.0042  | 0.0079 | 0.9984 | 0.9497   |
| Admin 1     | 2000 | 147.0000  | -0.0047  | 0.0198 | 0.9939 | 0.8695   |
| Admin 1     | 2005 | 79.0000   | -0.0103  | 0.0285 | 0.9814 | 0.9396   |
| Admin 1     | 2010 | 115.5750  | 0.0012   | 0.0077 | 0.9974 | 0.9536   |
| Admin 1     | 2015 | 75.0342   | -0.0042  | 0.0195 | 0.9913 | 0.9497   |
| Admin 2     | 2000 | 12.1809   | -0.0047  | 0.0423 | 0.9738 | 0.8695   |
| Admin 2     | 2005 | 3.8181    | -0.0103  | 0.0614 | 0.9279 | 0.9396   |
| Admin 2     | 2010 | 4.9258    | 0.0012   | 0.0186 | 0.9852 | 0.9536   |
| Admin 2     | 2015 | 4.0000    | -0.0042  | 0.0639 | 0.9352 | 0.9497   |

**Supplementary Table 35. In sample predictive metrics for 6–11 years of education (men, ages 20–24), aggregated to admin 0, admin 1, and admin 2**

| Aggregation | Year | Median SS | Mean Err | RMSE   | Corr.  | 95% Cov. |
|-------------|------|-----------|----------|--------|--------|----------|
| Admin 0     | 2000 | 1481.0256 | -0.0038  | 0.0122 | 0.9978 | 0.8853   |
| Admin 0     | 2005 | 1620.1010 | -0.0100  | 0.0157 | 0.9953 | 0.9354   |
| Admin 0     | 2010 | 1764.0000 | 0.0000   | 0.0011 | 0.9992 | 0.9778   |
| Admin 0     | 2015 | 1875.0000 | -0.0038  | 0.0067 | 0.9988 | 0.9475   |
| Admin 1     | 2000 | 140.3899  | -0.0038  | 0.0183 | 0.9943 | 0.8853   |
| Admin 1     | 2005 | 81.2930   | -0.0100  | 0.0281 | 0.9801 | 0.9354   |
| Admin 1     | 2010 | 128.0000  | 0.0000   | 0.0046 | 0.9985 | 0.9778   |
| Admin 1     | 2015 | 82.0000   | -0.0038  | 0.0195 | 0.9902 | 0.9475   |
| Admin 2     | 2000 | 11.4167   | -0.0038  | 0.0396 | 0.9736 | 0.8853   |
| Admin 2     | 2005 | 3.6464    | -0.0100  | 0.0597 | 0.9245 | 0.9354   |
| Admin 2     | 2010 | 4.9080    | 0.0000   | 0.0105 | 0.9921 | 0.9778   |
| Admin 2     | 2015 | 3.7725    | -0.0038  | 0.0653 | 0.9266 | 0.9475   |

Validation Plot for edu\_primary\_prop\_20\_24\_female by Country  
OOS: FALSE

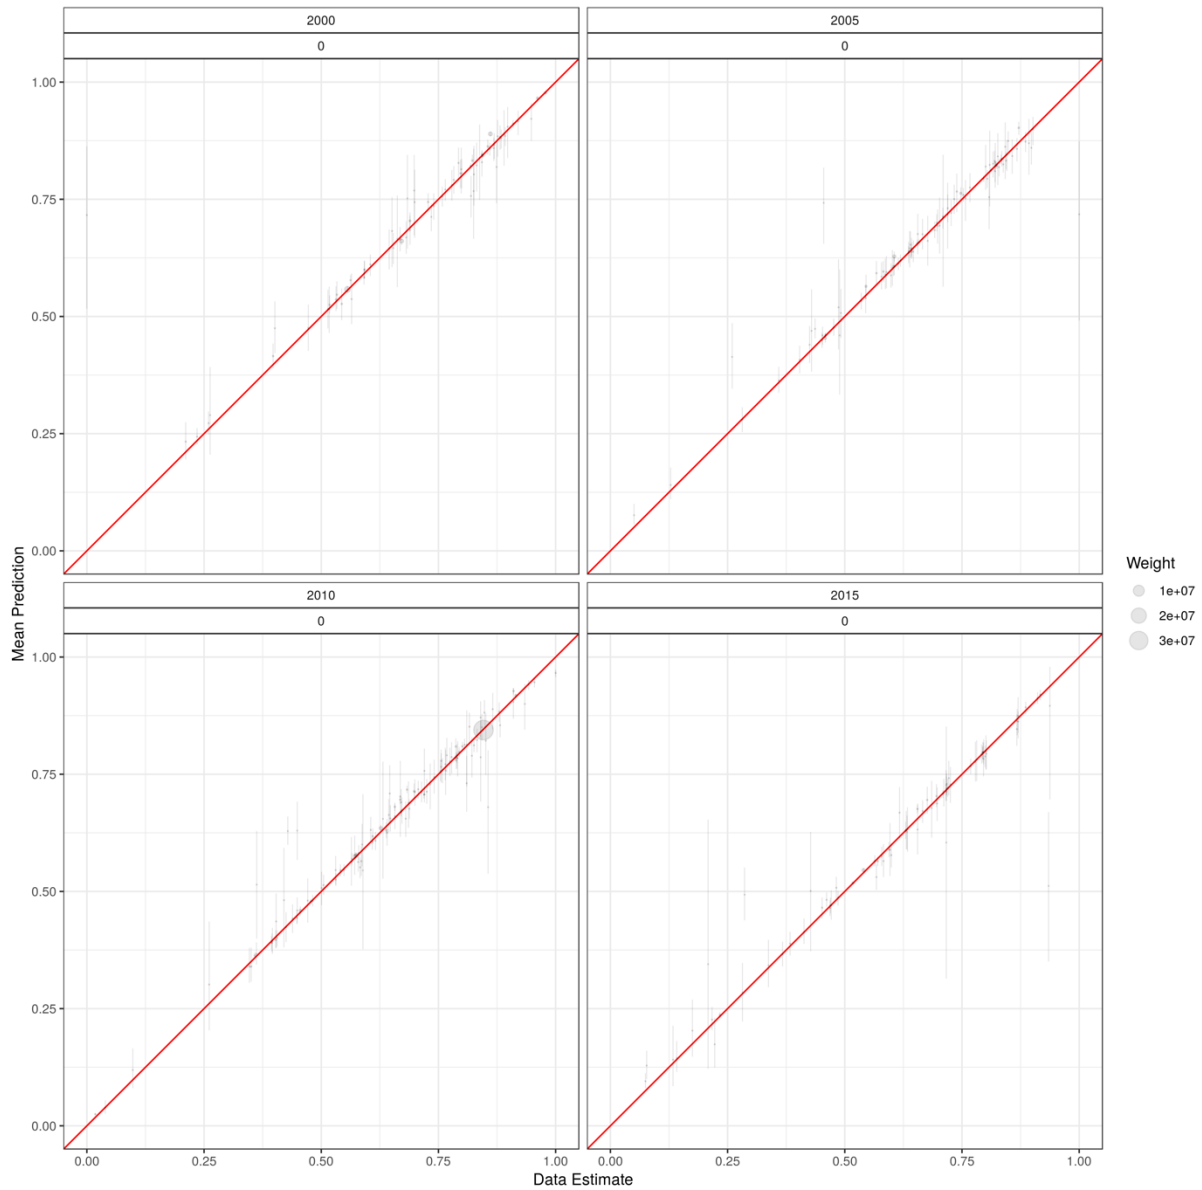

**Supplementary Figure 58. 6–11 years education (women, ages 20–24) admin 0 aggregation**  
Comparison of in-sample education predictions aggregated to admin 0 with 95% uncertainty intervals plotted against admin 1 aggregated data observations.



Validation Plot for edu\_primary\_prop\_20\_24\_female by Admin 1  
OOS: FALSE

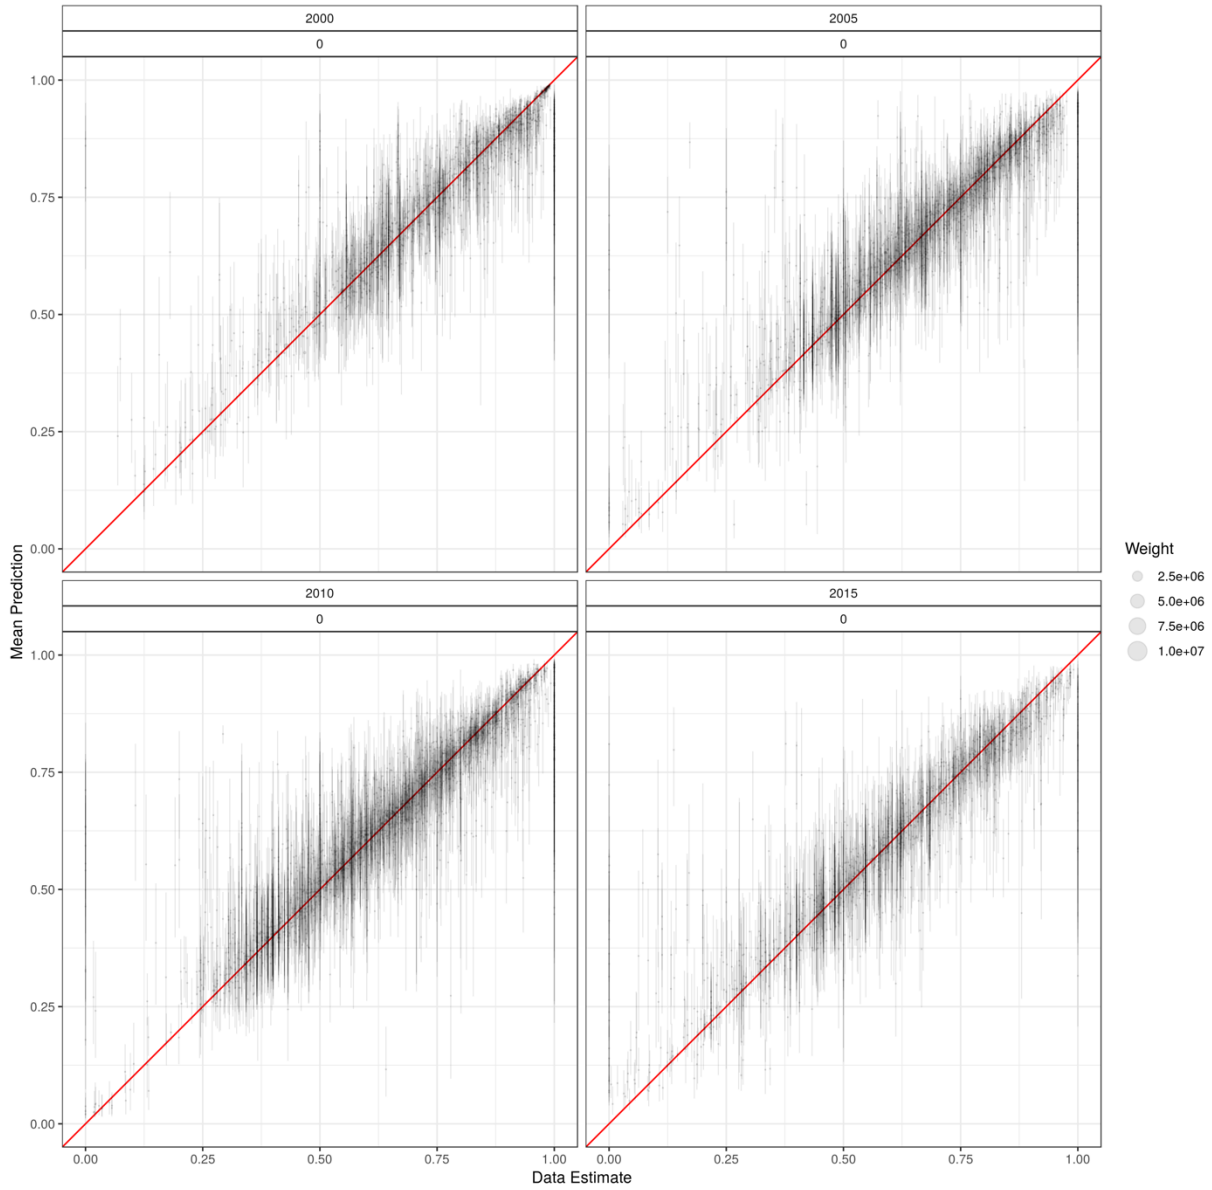

**Supplementary Figure 59. 6–11 years education (women, ages 20–24) admin 1 aggregation**  
Comparison of in-sample education predictions aggregated to admin 1 with 95% uncertainty intervals plotted against admin 1 aggregated data observations.

Validation Plot for edu\_primary\_prop\_20\_24\_female by Admin 2  
OOS: FALSE

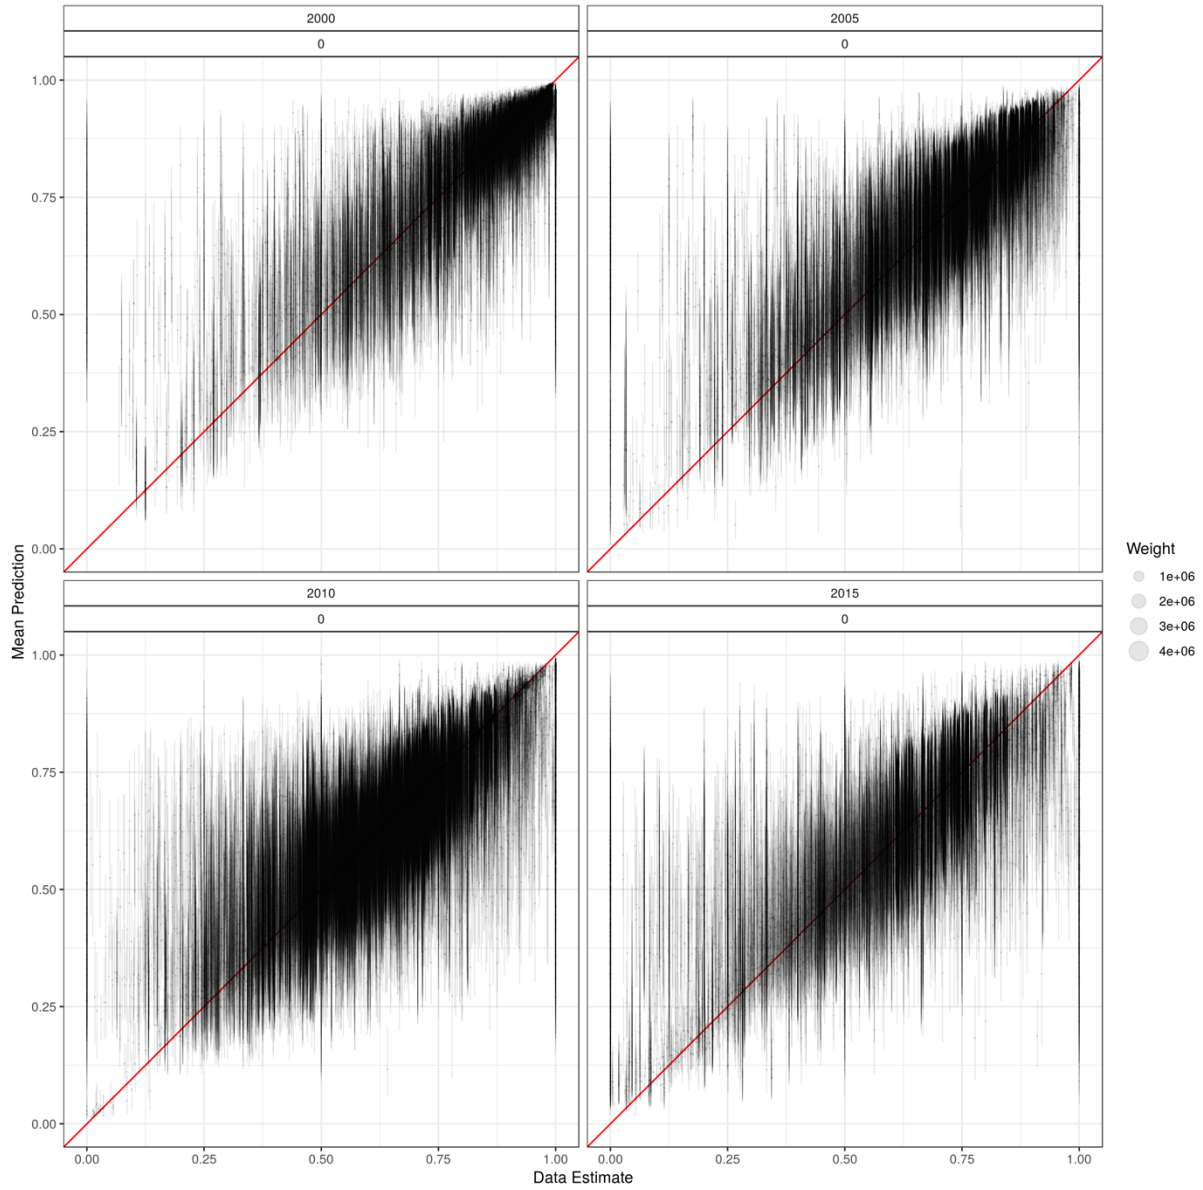

**Supplementary Figure 60. 6–11 years education (women, ages 20–24) admin 2 aggregation**  
Comparison of in-sample education predictions aggregated to admin 2 with 95% uncertainty intervals plotted against admin 1 aggregated data observations.

Validation Plot for edu\_primary\_prop\_20\_24\_male by Country  
OOS: FALSE

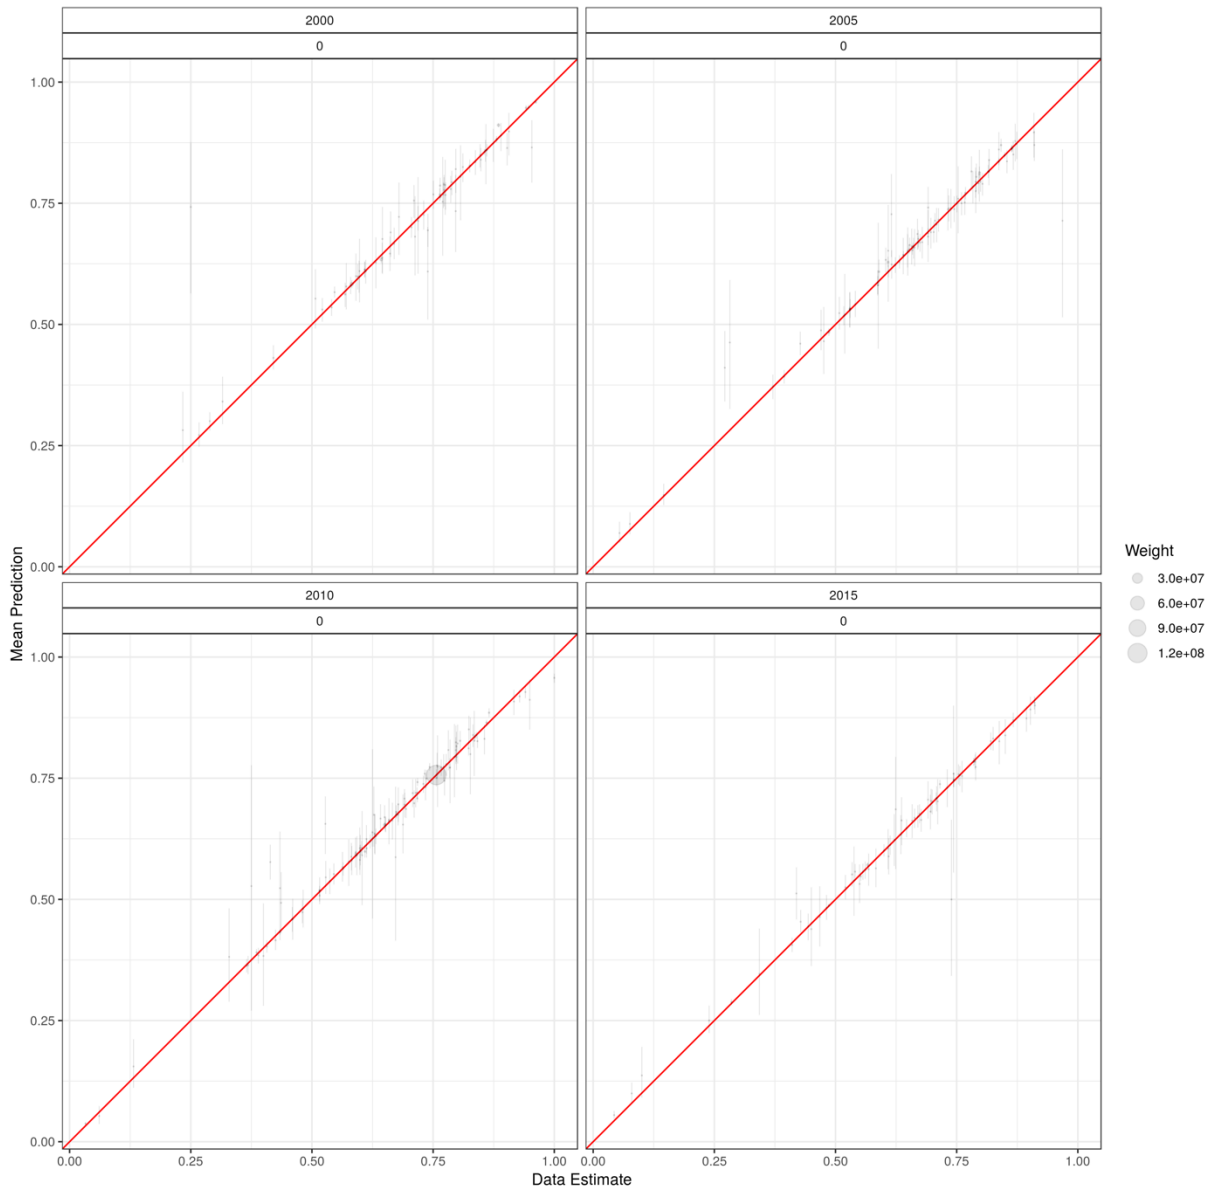

**Supplementary Figure 61. 6–11 years education (men, ages 20–24) admin 0 aggregation**  
Comparison of in-sample education predictions aggregated to admin 0 with 95% uncertainty intervals plotted against admin 1 aggregated data observations.

Validation Plot for edu\_primary\_prop\_20\_24\_male by Admin 1  
OOS: FALSE

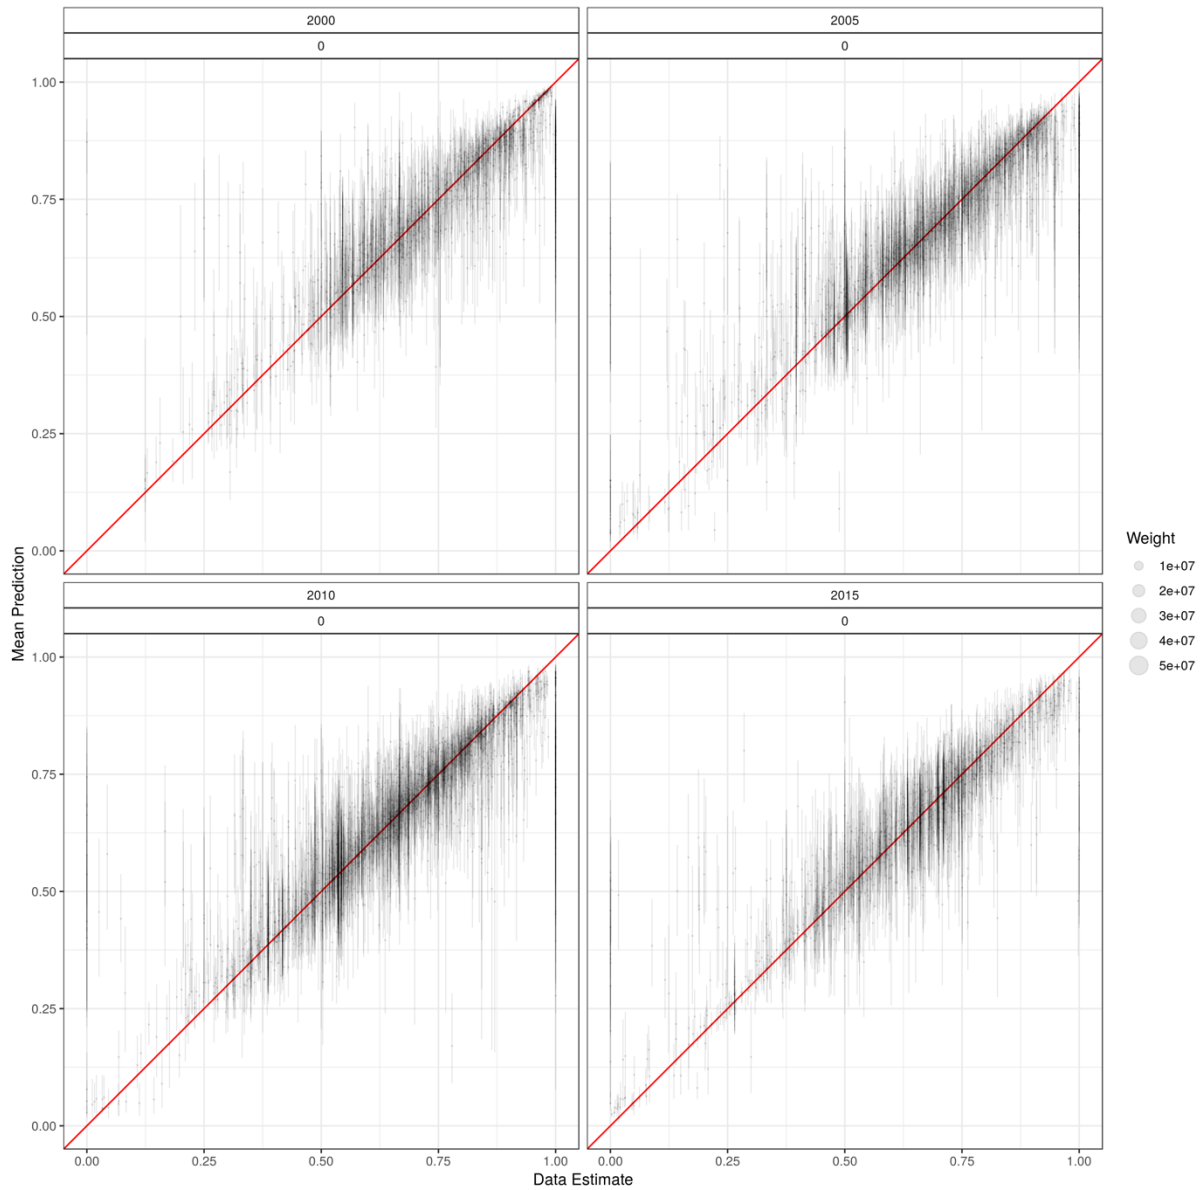

**Supplementary Figure 62. 6–11 years education (men, ages 20–24) admin 1 aggregation**  
Comparison of in-sample education predictions aggregated to admin 1 with 95% uncertainty intervals plotted against admin 1 aggregated data observations.

Validation Plot for edu\_primary\_prop\_20\_24\_male by Admin 2  
OOS: FALSE

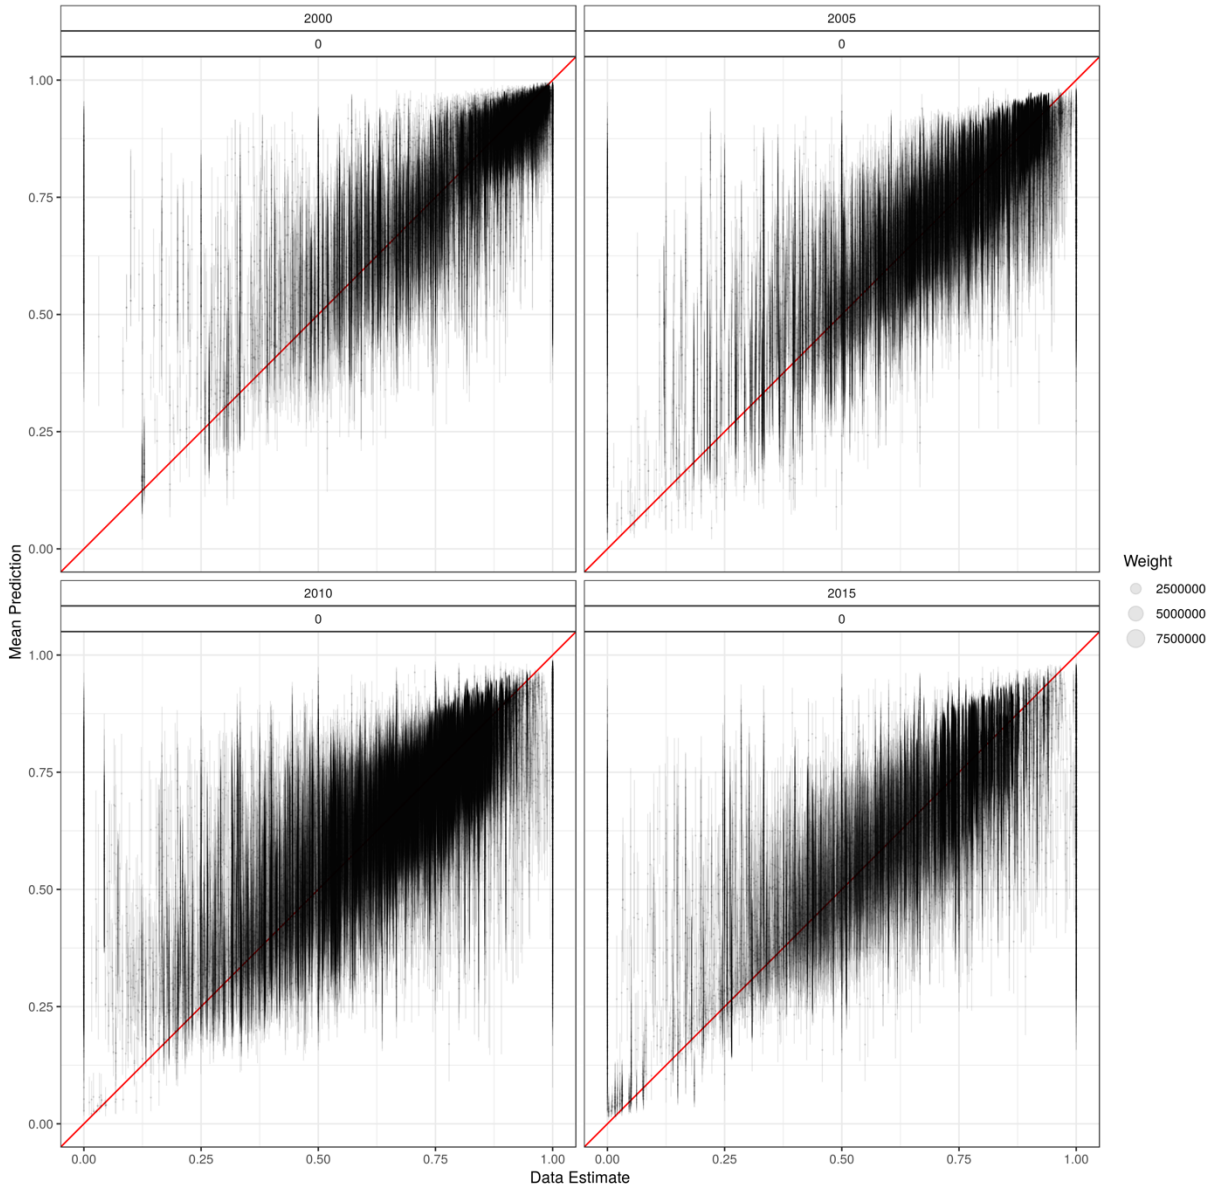

**Supplementary Figure 63. 6–11 years education (men, ages 20–24) admin 2 aggregation**  
Comparison of in-sample education predictions aggregated to admin 2 with 95% uncertainty intervals plotted against admin 1 aggregated data observations.

**Supplementary Table 36. In sample predictive metrics for mean years of education (women, ages 15–49), aggregated to admin 0, admin 1, and admin 2**

| Aggregation | Year | Median SS  | Mean Err | RMSE   | Corr.  | 95% Cov. |
|-------------|------|------------|----------|--------|--------|----------|
| Admin 0     | 2000 | 12914.7806 | -0.0131  | 0.2030 | 0.9938 | 0.9994   |
| Admin 0     | 2005 | 15225.4068 | -0.0815  | 0.1724 | 0.9977 | 0.9978   |
| Admin 0     | 2010 | 19025.0000 | -0.3599  | 0.3658 | 0.9915 | 0.9999   |
| Admin 0     | 2015 | 13782.0000 | -0.1180  | 0.2024 | 0.9952 | 0.9989   |
| Admin 1     | 2000 | 1228.0000  | -0.0131  | 0.2611 | 0.9916 | 0.9994   |
| Admin 1     | 2005 | 750.0000   | -0.0815  | 0.3053 | 0.9934 | 0.9978   |
| Admin 1     | 2010 | 1077.8178  | -0.3599  | 0.3759 | 0.9878 | 0.9999   |
| Admin 1     | 2015 | 716.5000   | -0.1180  | 0.2802 | 0.9924 | 0.9989   |
| Admin 2     | 2000 | 114.9720   | -0.0131  | 0.5549 | 0.9683 | 0.9994   |
| Admin 2     | 2005 | 31.0000    | -0.0815  | 0.7336 | 0.9654 | 0.9978   |
| Admin 2     | 2010 | 41.1510    | -0.3599  | 0.4123 | 0.9623 | 0.9999   |
| Admin 2     | 2015 | 31.6316    | -0.1180  | 0.5917 | 0.9695 | 0.9989   |

**Supplementary Table 37. In sample predictive metrics for mean years of education (men, ages 15–49), aggregated to admin 0, admin 1, and admin 2**

| Aggregation | Year | Median SS | Mean Err | RMSE     | Corr.    | 95% Cov. |
|-------------|------|-----------|----------|----------|----------|----------|
| Admin 0     | 2000 | 11706.67  | -0.01185 | 0.211605 | 0.986663 | 0.999952 |
| Admin 0     | 2005 | 13164.39  | -0.05985 | 0.154427 | 0.996391 | 0.999056 |
| Admin 0     | 2010 | 17541     | -0.41332 | 0.415926 | 0.988207 | 0.99999  |
| Admin 0     | 2015 | 12977     | -0.11687 | 0.182033 | 0.989548 | 0.999756 |
| Admin 1     | 2000 | 1126      | -0.01185 | 0.268604 | 0.986174 | 0.999952 |
| Admin 1     | 2005 | 690       | -0.05985 | 0.286045 | 0.990389 | 0.999056 |
| Admin 1     | 2010 | 1028.458  | -0.41332 | 0.41939  | 0.986606 | 0.99999  |
| Admin 1     | 2015 | 671       | -0.11687 | 0.253781 | 0.986784 | 0.999756 |
| Admin 2     | 2000 | 111.7156  | -0.01185 | 0.580402 | 0.951606 | 0.999952 |
| Admin 2     | 2005 | 28.89     | -0.05985 | 0.665189 | 0.957281 | 0.999056 |
| Admin 2     | 2010 | 38.1188   | -0.41332 | 0.432549 | 0.961373 | 0.99999  |
| Admin 2     | 2015 | 30        | -0.11687 | 0.564951 | 0.949483 | 0.999756 |

Validation Plot for edu\_mean\_15\_49\_female by Country  
OOS: FALSE

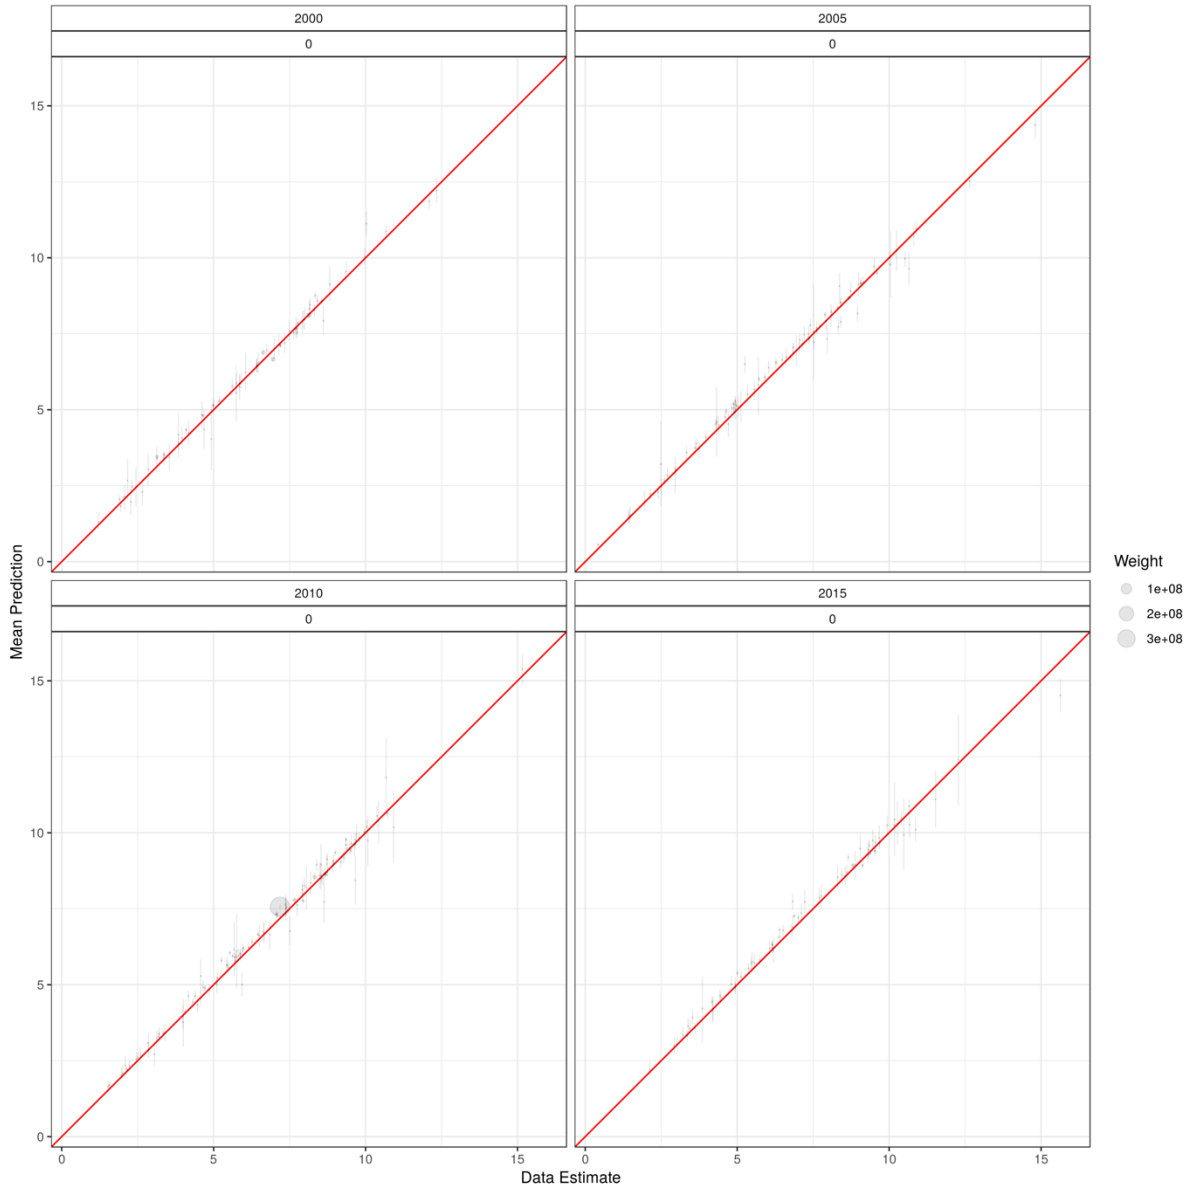

**Supplementary Figure 64. Mean years education (women, ages 15–49) admin 0 aggregation**  
Comparison of in-sample education predictions aggregated to admin 0 with 95% uncertainty intervals plotted against admin 1 aggregated data observations.

Validation Plot for edu\_mean\_15\_49\_female by Admin 1  
OOS: FALSE

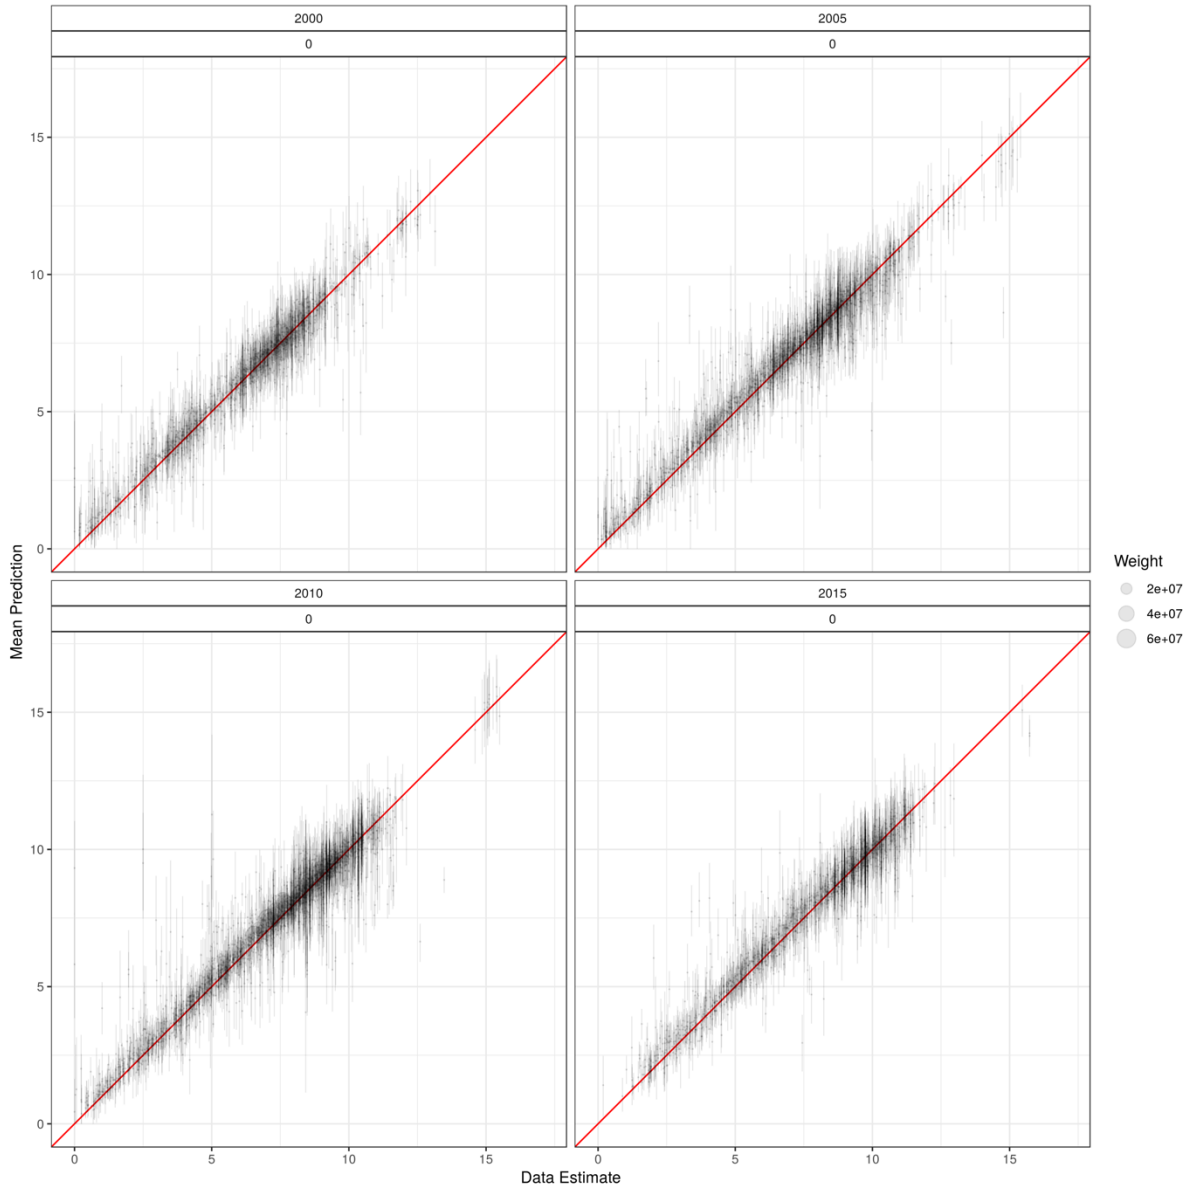

**Supplementary Figure 65. Mean years education (women, ages 15–49) admin 1 aggregation**  
Comparison of in-sample education predictions aggregated to admin 1 with 95% uncertainty intervals plotted against admin 1 aggregated data observations.



Validation Plot for edu\_mean\_15\_49\_female by Admin 2  
OOS: FALSE

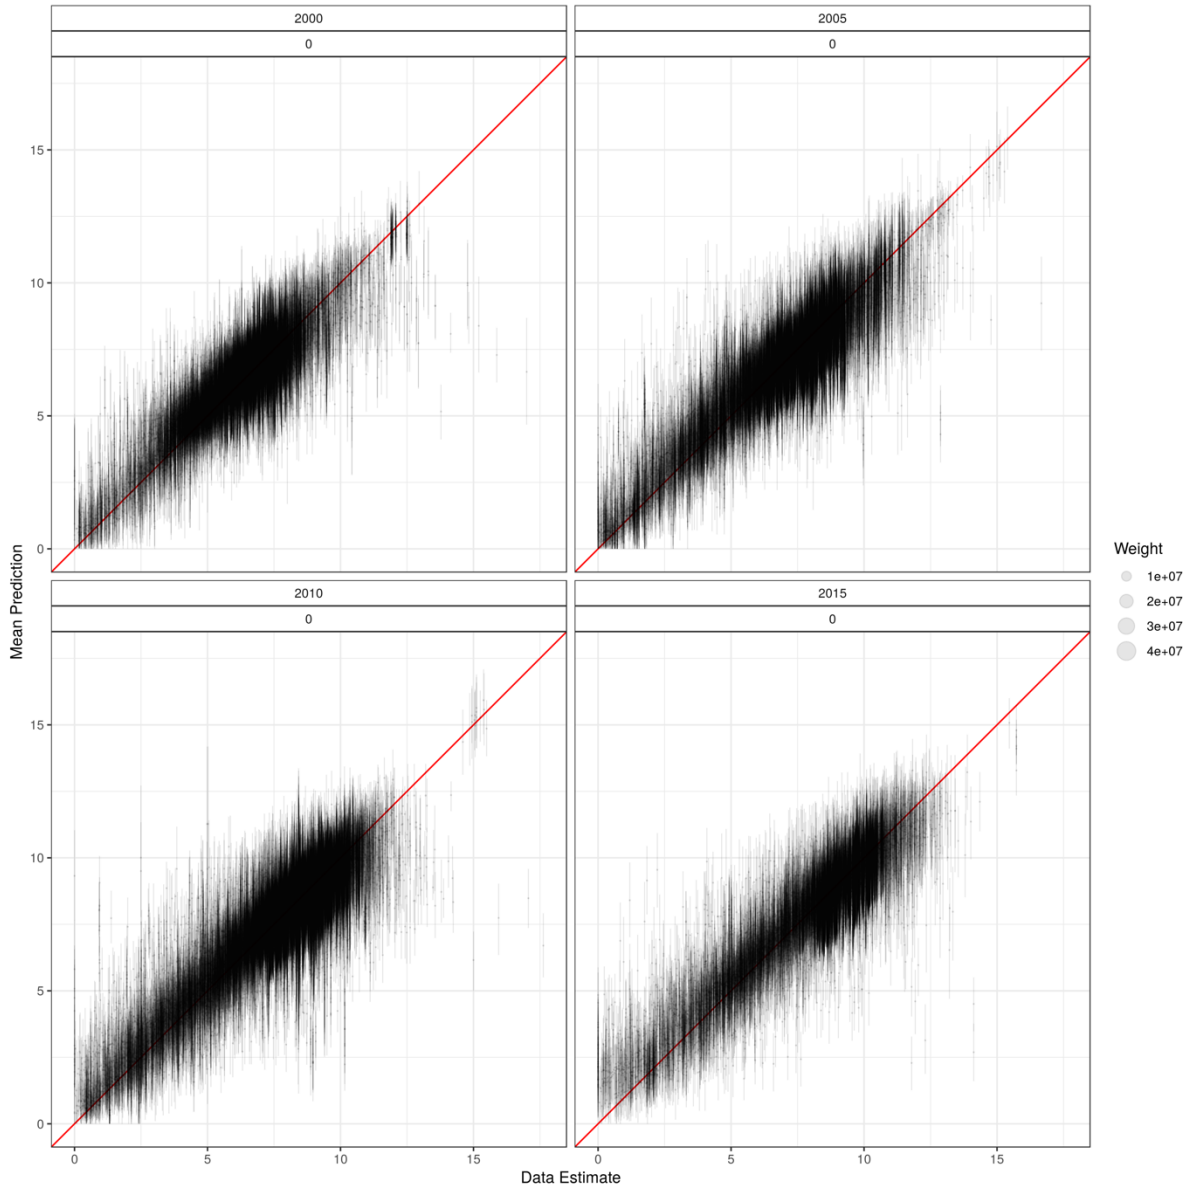

**Supplementary Figure 66. Mean years education (women, ages 15–49) admin 2 aggregation**  
Comparison of in-sample education predictions aggregated to admin 2 with 95% uncertainty intervals plotted against admin 1 aggregated data observations.

Validation Plot for edu\_mean\_15\_49\_male by Country  
OOS: FALSE

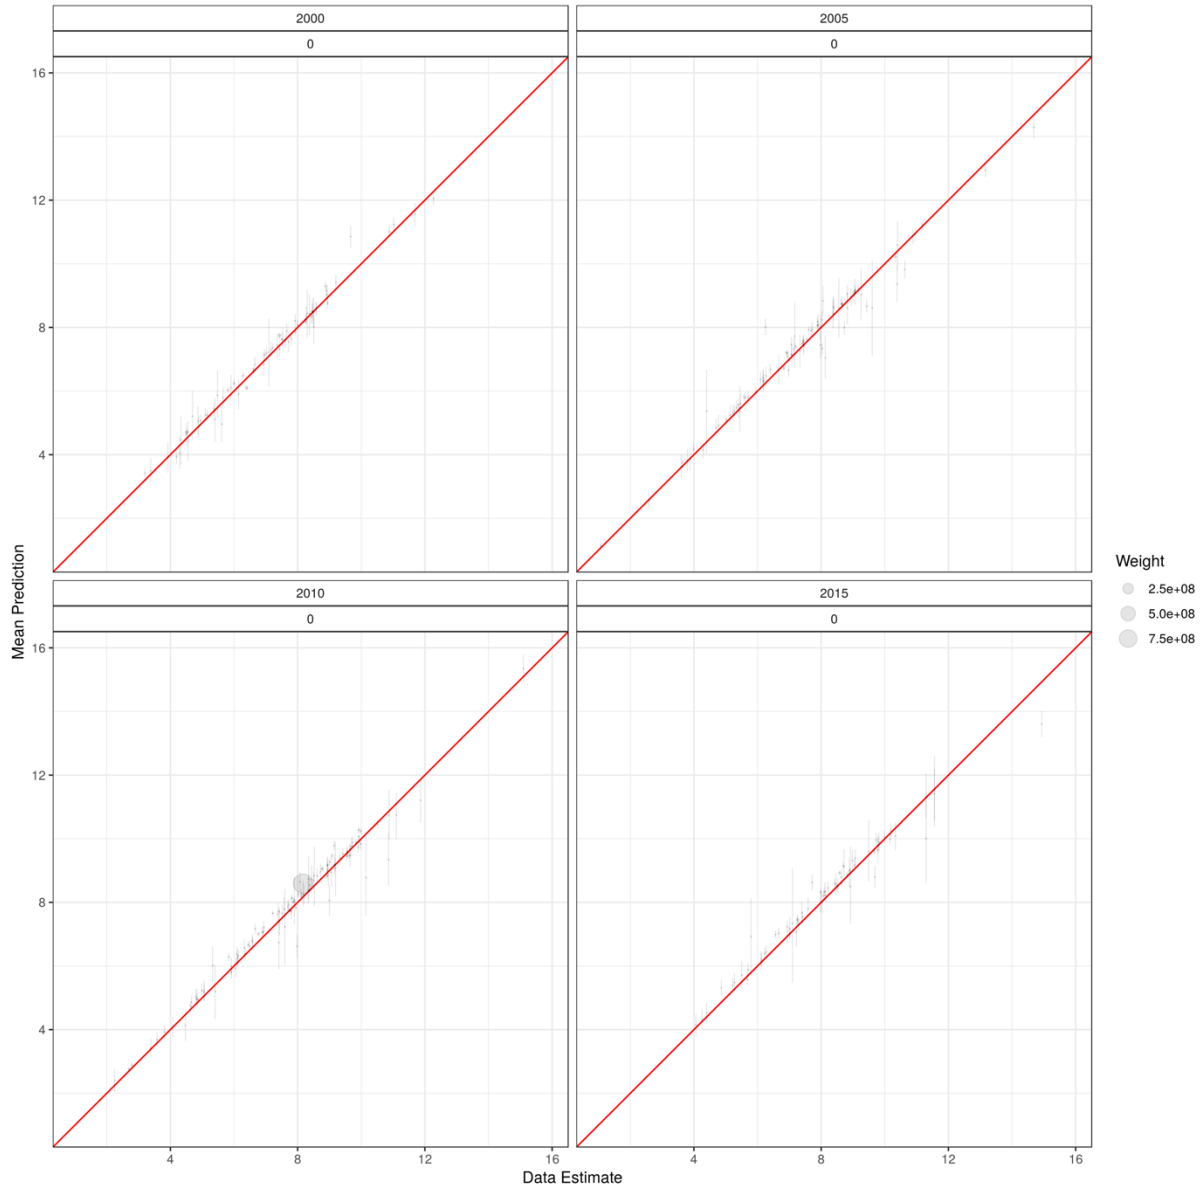

**Supplementary Figure 67. Mean years education (men, ages 15–49) admin 0 aggregation**  
Comparison of in-sample education predictions aggregated to admin 0 with 95% uncertainty intervals plotted against admin 1 aggregated data observations.

Validation Plot for edu\_mean\_15\_49\_male by Admin 1  
OOS: FALSE

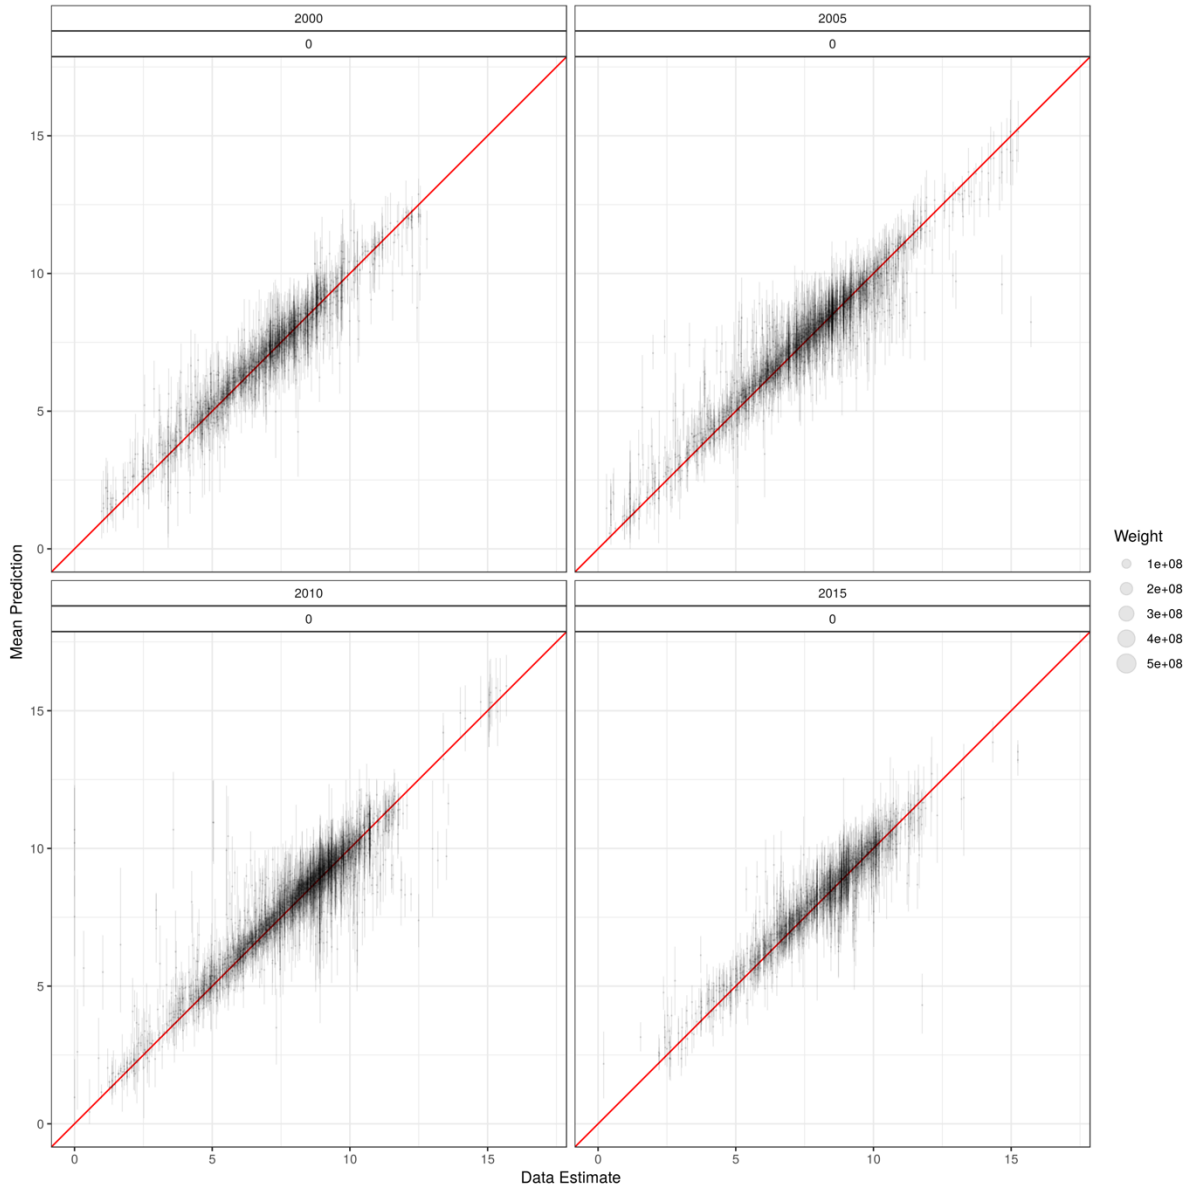

**Supplementary Figure 68. Mean years education (men, ages 15–49) admin 1 aggregation**  
Comparison of in-sample education predictions aggregated to admin 1 with 95% uncertainty intervals plotted against admin 1 aggregated data observations.

Validation Plot for edu\_mean\_15\_49\_male by Admin 2  
OOS: FALSE

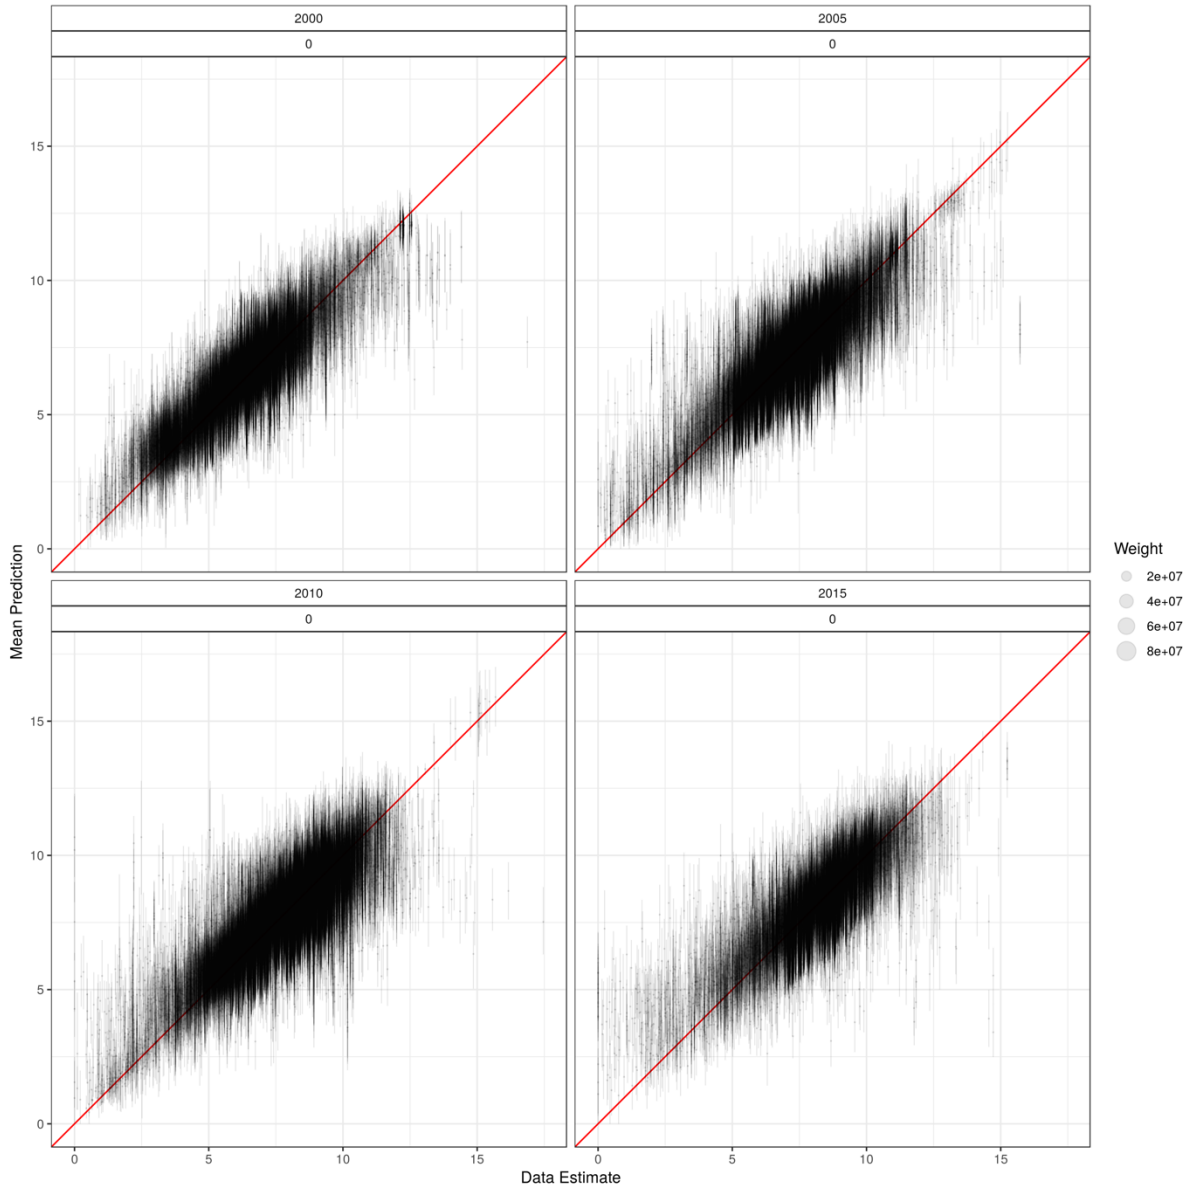

**Supplementary Figure 69. Mean years education (men, ages 15–49) admin 2 aggregation**  
Comparison of in-sample education predictions aggregated to admin 2 with 95% uncertainty intervals plotted against admin 1 aggregated data observations.

**Supplementary Table 38. In sample predictive metrics for mean years of education (women, ages 20–24), aggregated to admin 0, admin 1, and admin 2**

| Aggregation | Year | Median SS | Mean Err | RMSE   | Corr.  | 95% Cov. |
|-------------|------|-----------|----------|--------|--------|----------|
| Admin 0     | 2000 | 2528.1849 | -0.0236  | 0.1506 | 0.9976 | 0.9997   |
| Admin 0     | 2005 | 2962.2179 | -0.0589  | 0.1409 | 0.9984 | 0.9973   |
| Admin 0     | 2010 | 3493.0000 | -0.3365  | 0.3448 | 0.9958 | 0.9999   |
| Admin 0     | 2015 | 2362.0000 | -0.1001  | 0.1591 | 0.9975 | 0.9987   |
| Admin 1     | 2000 | 215.0000  | -0.0236  | 0.2148 | 0.9954 | 0.9997   |
| Admin 1     | 2005 | 138.0000  | -0.0589  | 0.2860 | 0.9946 | 0.9973   |
| Admin 1     | 2010 | 190.0000  | -0.3365  | 0.3528 | 0.9971 | 0.9999   |
| Admin 1     | 2015 | 128.0000  | -0.1001  | 0.2658 | 0.9930 | 0.9987   |
| Admin 2     | 2000 | 19.0000   | -0.0236  | 0.5171 | 0.9760 | 0.9997   |
| Admin 2     | 2005 | 5.0471    | -0.0589  | 0.7262 | 0.9688 | 0.9973   |
| Admin 2     | 2010 | 6.2313    | -0.3365  | 0.4070 | 0.9870 | 0.9999   |
| Admin 2     | 2015 | 4.8115    | -0.1001  | 0.6210 | 0.9659 | 0.9987   |

**Supplementary Table 39. In sample predictive metrics for mean years of education (men, ages 20–24), aggregated to admin 0, admin 1, and admin 2**

| Aggregation | Year | Median SS | Mean Err | RMSE     | Corr.    | 95% Cov. |
|-------------|------|-----------|----------|----------|----------|----------|
| Admin 0     | 2000 | 2141.782  | 0.014528 | 0.140889 | 0.995687 | 0.999944 |
| Admin 0     | 2005 | 2206      | -0.03624 | 0.106466 | 0.998316 | 0.999445 |
| Admin 0     | 2010 | 2828      | -0.31648 | 0.31901  | 0.99316  | 0.999985 |
| Admin 0     | 2015 | 2306      | -0.07158 | 0.122757 | 0.995043 | 0.999774 |
| Admin 1     | 2000 | 192       | 0.014528 | 0.206854 | 0.993133 | 0.999944 |
| Admin 1     | 2005 | 119.5162  | -0.03624 | 0.27403  | 0.990543 | 0.999445 |
| Admin 1     | 2010 | 174.1984  | -0.31648 | 0.322961 | 0.99581  | 0.999985 |
| Admin 1     | 2015 | 113       | -0.07158 | 0.233732 | 0.986468 | 0.999774 |
| Admin 2     | 2000 | 18.9655   | 0.014528 | 0.524231 | 0.963966 | 0.999944 |
| Admin 2     | 2005 | 4.9025    | -0.03624 | 0.655556 | 0.95533  | 0.999445 |
| Admin 2     | 2010 | 5.962     | -0.31648 | 0.341078 | 0.984378 | 0.999985 |
| Admin 2     | 2015 | 4.3568    | -0.07158 | 0.622937 | 0.929952 | 0.999774 |

Validation Plot for edu\_mean\_20\_24\_female by Country  
OOS: FALSE

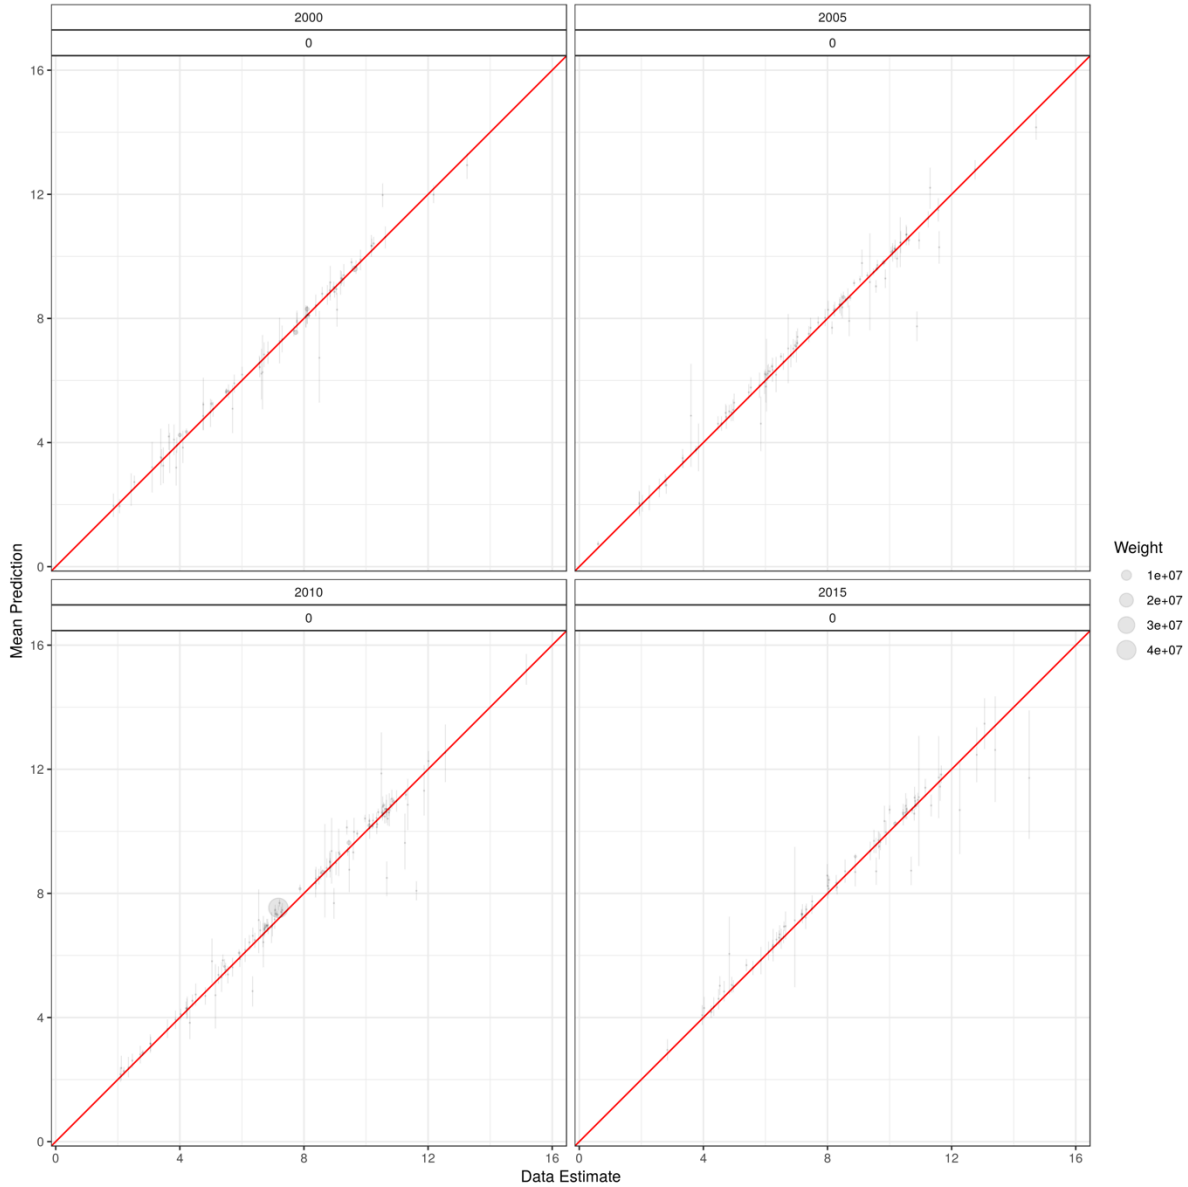

**Supplementary Figure 70. Mean years education (women, ages 20–24) admin 0 aggregation**  
Comparison of in-sample education predictions aggregated to admin 0 with 95% uncertainty intervals plotted against admin 1 aggregated data observations.

Validation Plot for edu\_mean\_20\_24\_female by Admin 1  
OOS: FALSE

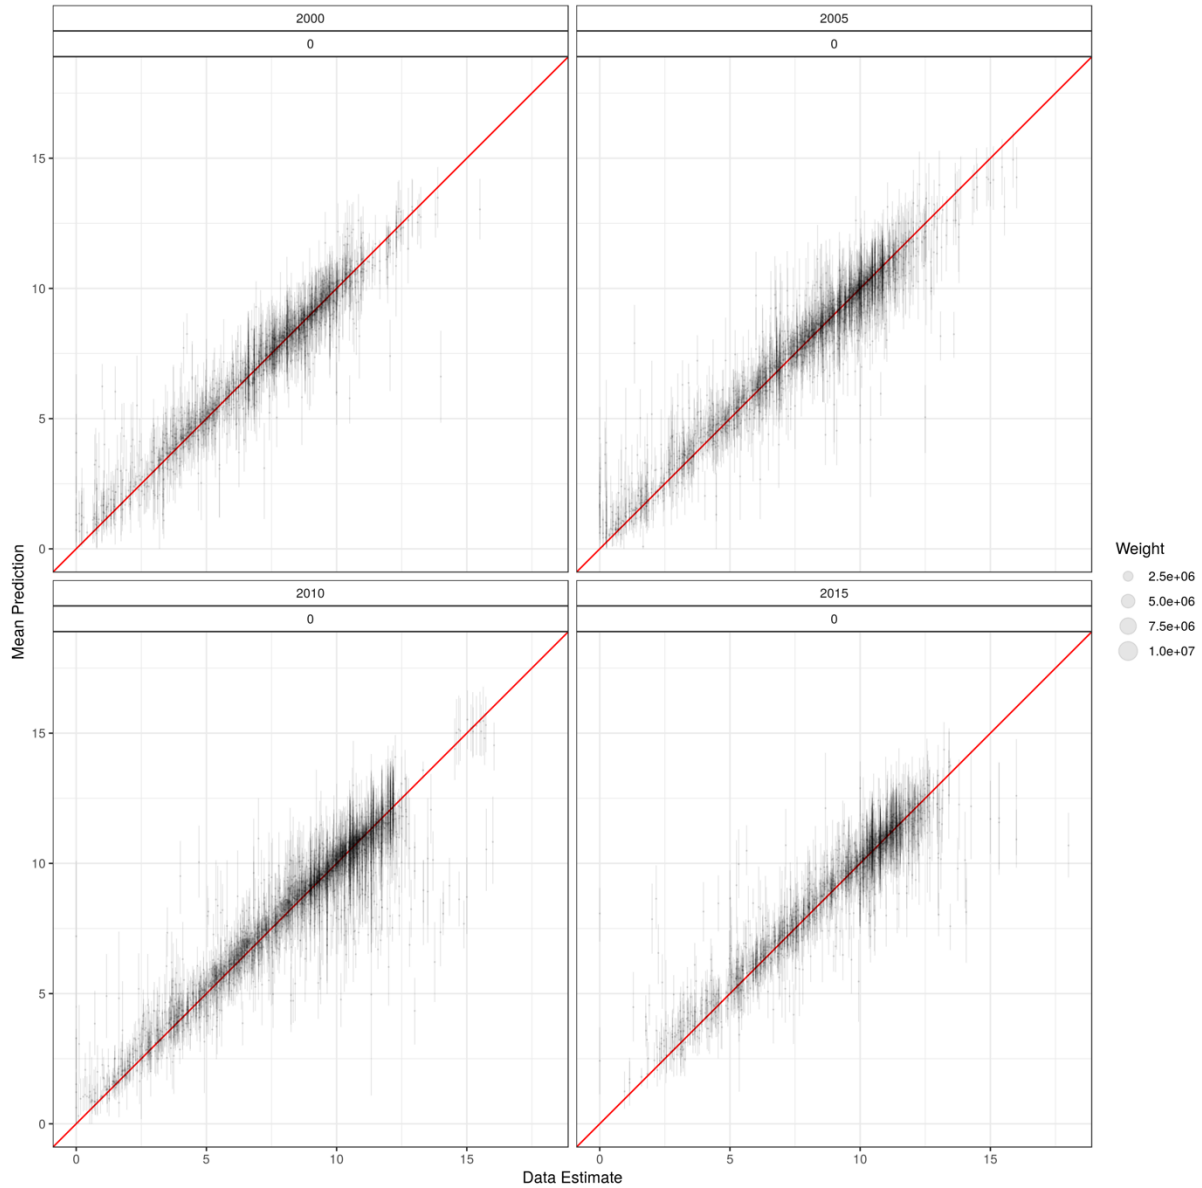

**Supplementary Figure 71. Mean years education (women, ages 20–24) admin 1 aggregation**  
Comparison of in-sample education predictions aggregated to admin 1 with 95% uncertainty intervals plotted against admin 1 aggregated data observations.

Validation Plot for edu\_mean\_20\_24\_female by Admin 2  
OOS: FALSE

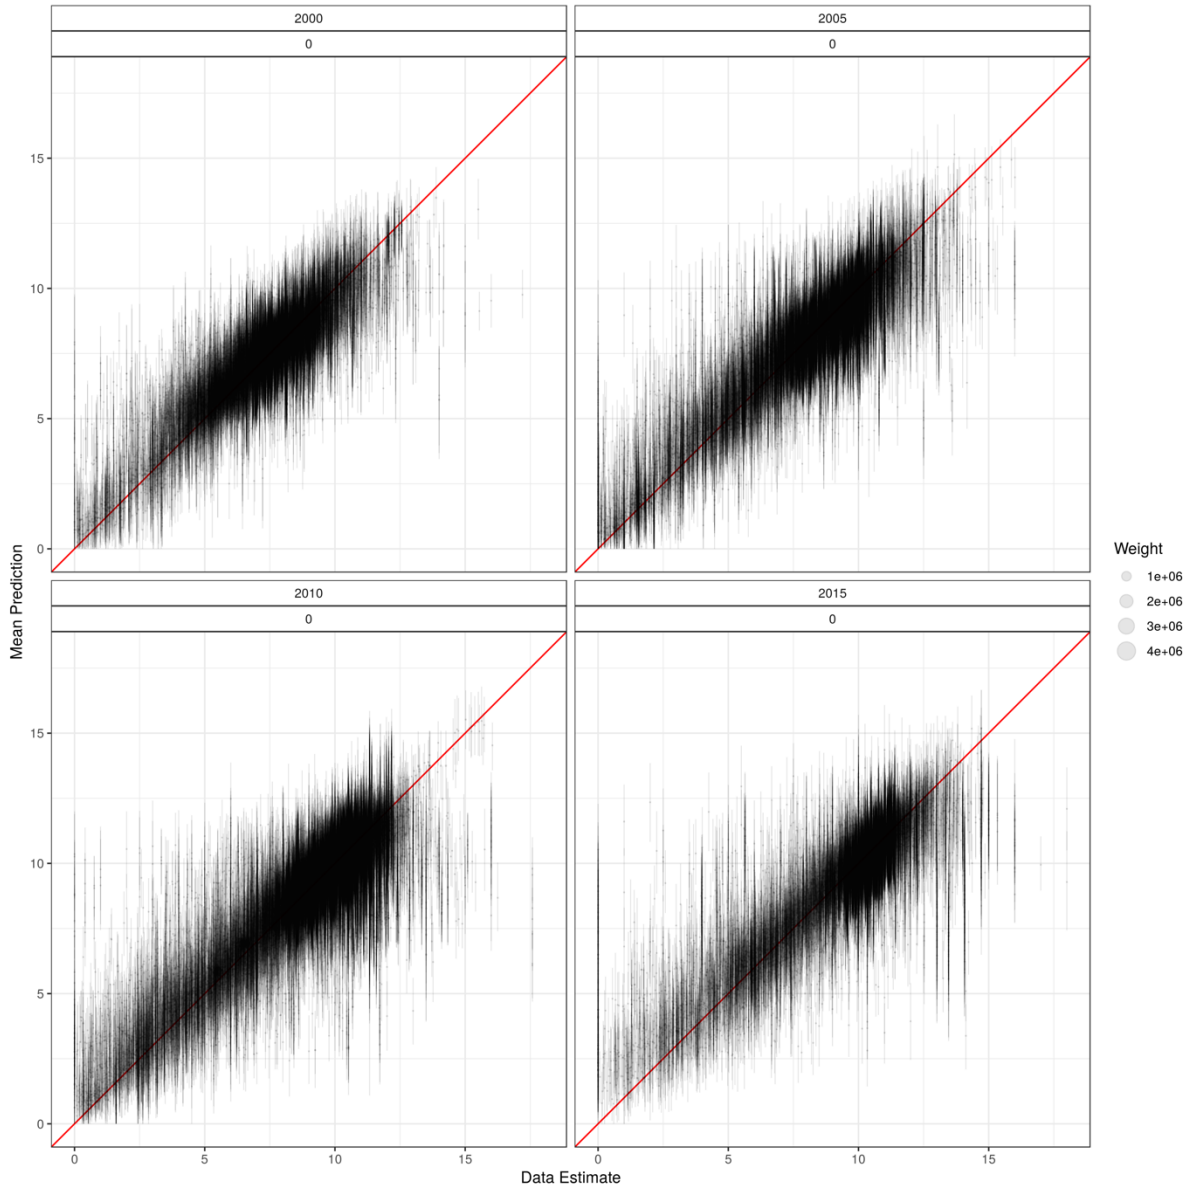

**Supplementary Figure 72. Mean years education (women, ages 20–24) admin 2 aggregation**  
Comparison of in-sample education predictions aggregated to admin 2 with 95% uncertainty intervals plotted against admin 1 aggregated data observations.



Validation Plot for edu\_mean\_20\_24\_male by Country  
OOS: FALSE

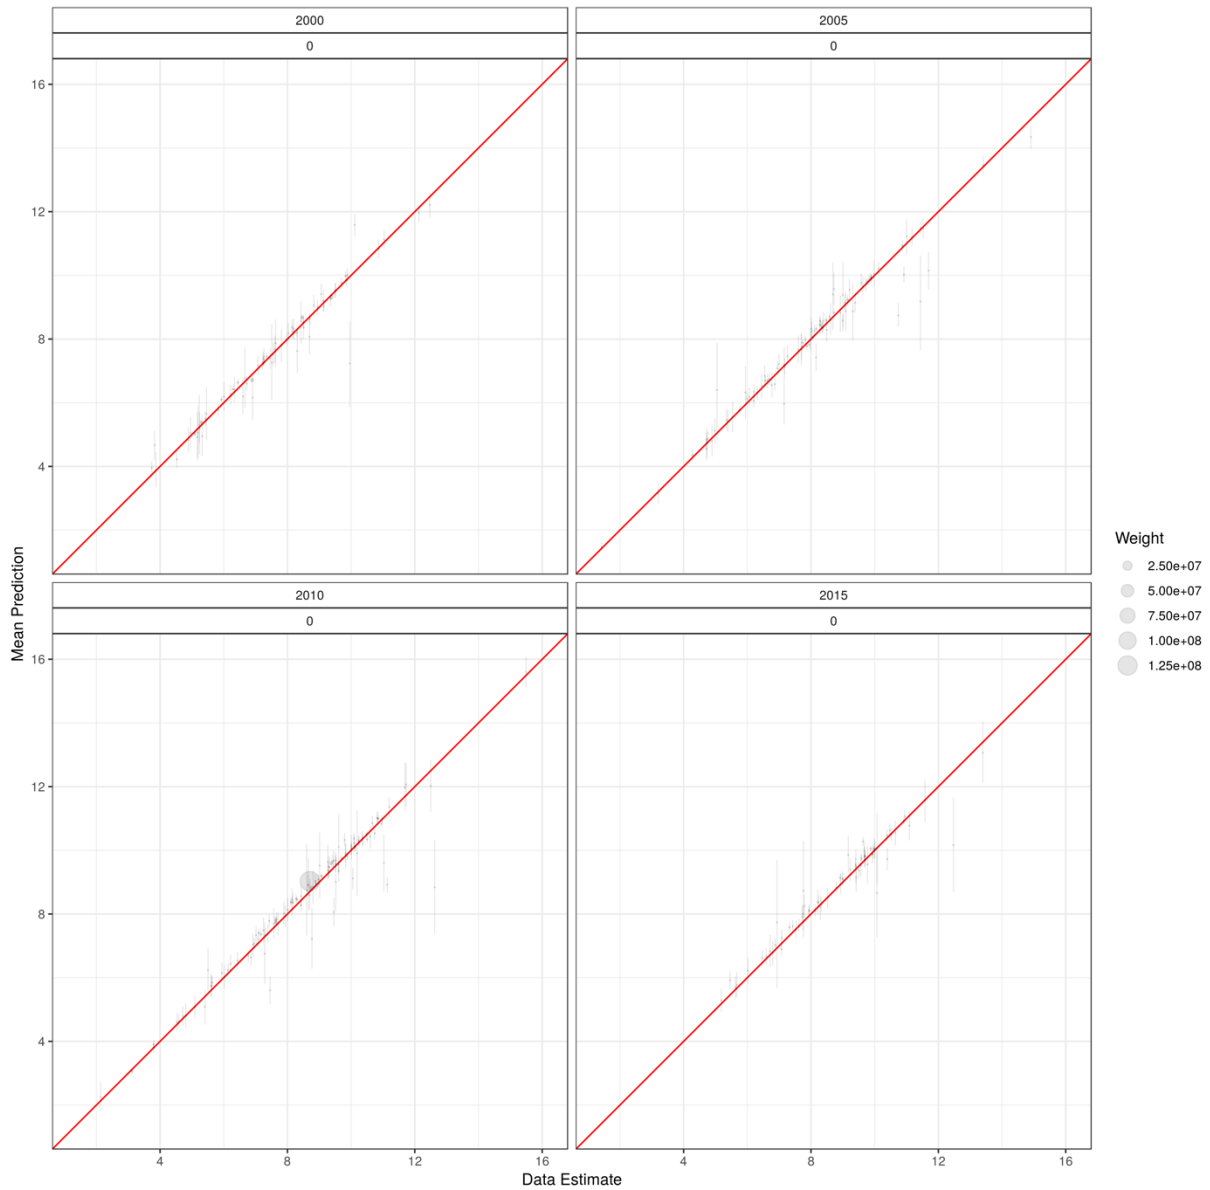

**Supplementary Figure 73. Mean years education (men, ages 20–24) admin 0 aggregation**  
Comparison of in-sample education predictions aggregated to admin 0 with 95% uncertainty intervals plotted against admin 1 aggregated data observations.

Validation Plot for edu\_mean\_20\_24\_male by Admin 1  
OOS: FALSE

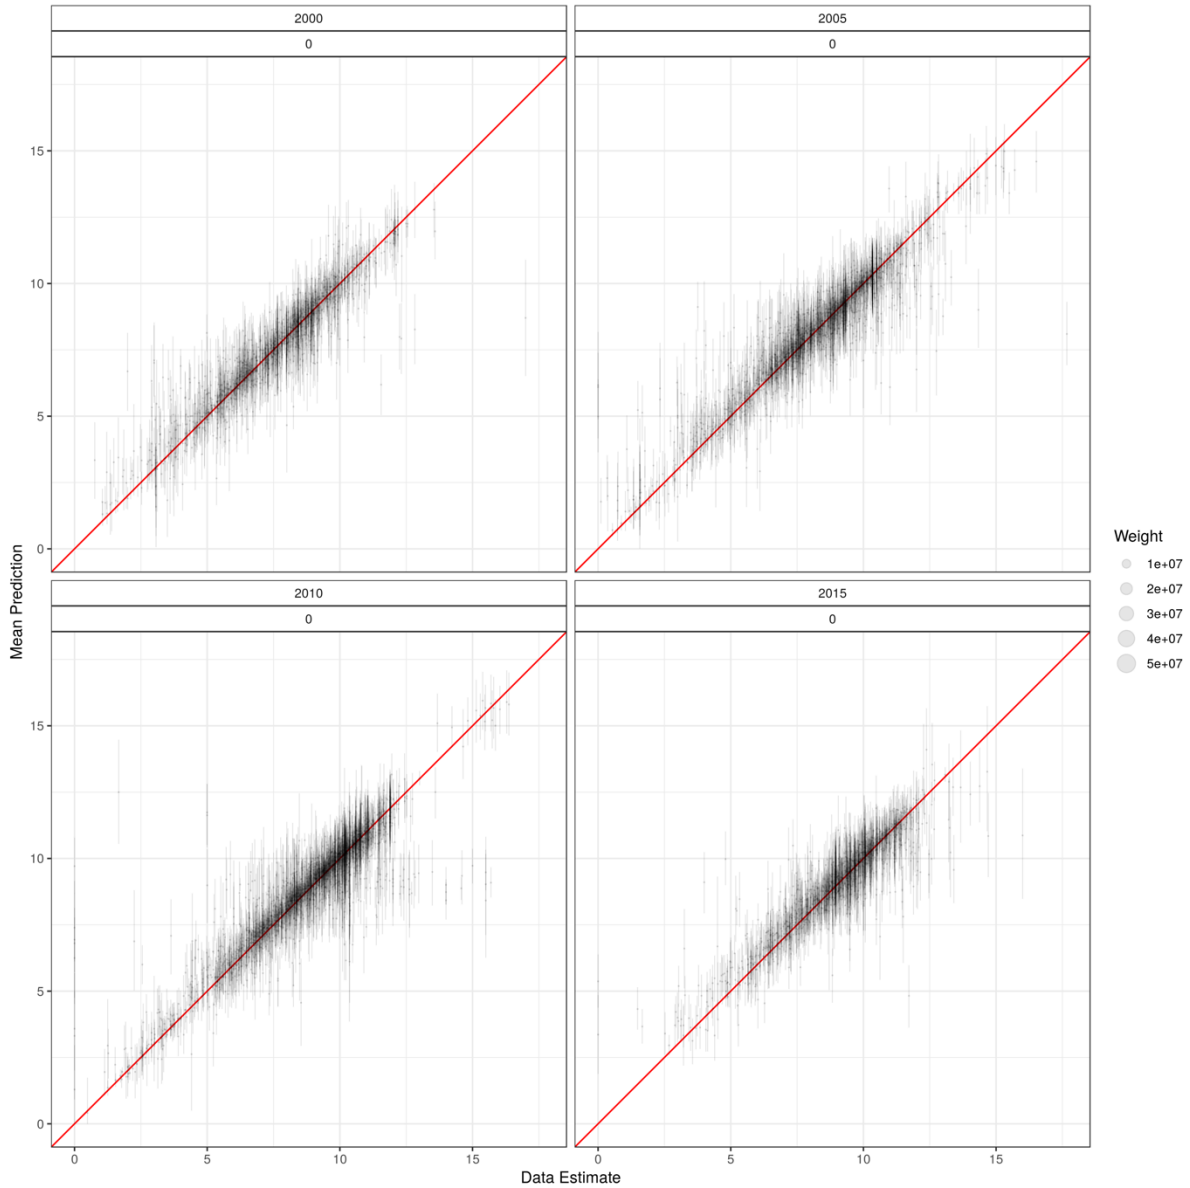

**Supplementary Figure 74. Mean years education (men, ages 20–24) admin 1 aggregation**  
Comparison of in-sample education predictions aggregated to admin 1 with 95% uncertainty intervals plotted against admin 1 aggregated data observations.

Validation Plot for edu\_mean\_20\_24\_male by Admin 2  
OOS: FALSE

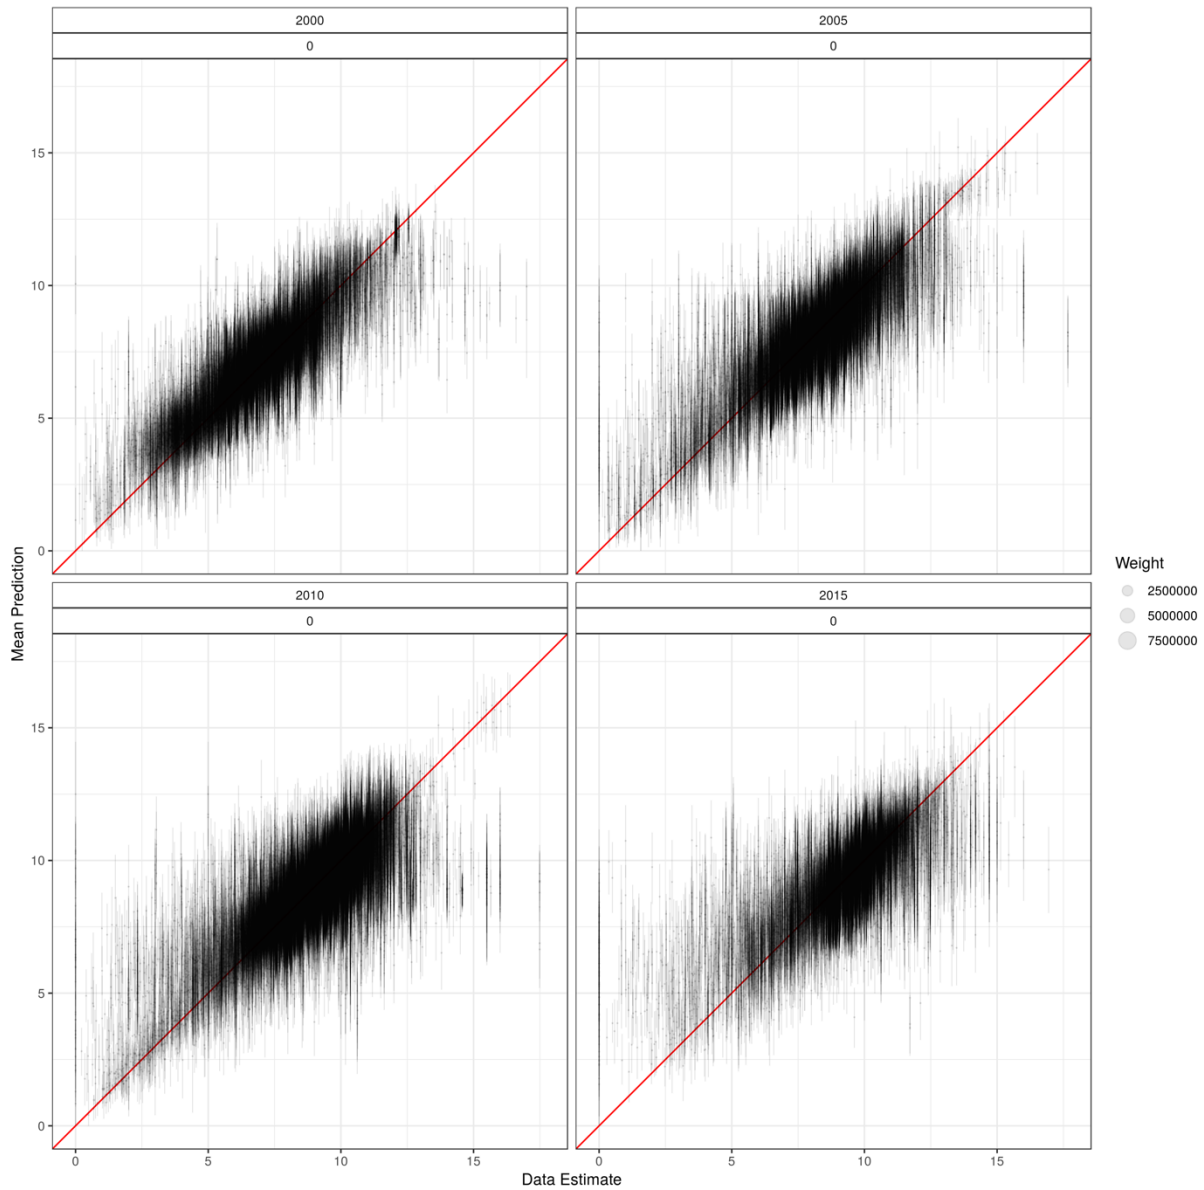

**Supplementary Figure 75. Mean years education (men, ages 20–24) admin 2 aggregation**  
Comparison of in-sample education predictions aggregated to admin 2 with 95% uncertainty intervals plotted against admin 1 aggregated data observations.

**Supplementary Table 40. Out of sample predictive metrics for zero years of education (women, ages 15–49), aggregated by fold to admin 0, admin 1, and admin 2**

| Aggregation | Year | Median SS | Mean Err | RMSE     | Corr.    | 95% Cov. |
|-------------|------|-----------|----------|----------|----------|----------|
| Admin 0     | 2000 | 13964     | 0.021816 | 0.073398 | 0.886468 | 0.733808 |
| Admin 0     | 2005 | 12507     | 0.043129 | 0.113146 | 0.874571 | 0.784065 |
| Admin 0     | 2010 | 16512     | -0.03541 | 0.07606  | 0.399688 | 0.600605 |
| Admin 0     | 2015 | 13780     | -0.00459 | 0.047058 | 0.951426 | 0.97231  |
| Admin 1     | 2000 | 1317.03   | 0.021816 | 0.084249 | 0.873736 | 0.733808 |
| Admin 1     | 2005 | 710       | 0.043129 | 0.123481 | 0.875769 | 0.784065 |
| Admin 1     | 2010 | 1059      | -0.03541 | 0.100874 | 0.372317 | 0.600605 |
| Admin 1     | 2015 | 802       | -0.00459 | 0.059673 | 0.930041 | 0.97231  |
| Admin 2     | 2000 | 149.0875  | 0.021816 | 0.098344 | 0.843907 | 0.733808 |
| Admin 2     | 2005 | 33.0365   | 0.043129 | 0.138161 | 0.852629 | 0.784065 |
| Admin 2     | 2010 | 53.91765  | -0.03541 | 0.10243  | 0.371169 | 0.600605 |
| Admin 2     | 2015 | 36.1915   | -0.00459 | 0.077226 | 0.889754 | 0.97231  |

**Supplementary Table 41. Out of sample predictive metrics for zero years of education (women, ages 20–24), aggregated by fold to admin 0, admin 1, and admin 2**

| Aggregation | Year | Median SS | Mean Err | RMSE     | Corr.    | 95% Cov. |
|-------------|------|-----------|----------|----------|----------|----------|
| Admin 0     | 2000 | 2582      | 0.028997 | 0.06382  | 0.903345 | 0.58698  |
| Admin 0     | 2005 | 2409      | -0.00012 | 0.090847 | 0.878222 | 0.712959 |
| Admin 0     | 2010 | 2751      | -0.09621 | 0.104118 | 0.73513  | 0.449646 |
| Admin 0     | 2015 | 2554      | -0.00825 | 0.045658 | 0.939149 | 0.928603 |
| Admin 1     | 2000 | 228.5     | 0.028997 | 0.081401 | 0.856628 | 0.58698  |
| Admin 1     | 2005 | 112.7412  | -0.00012 | 0.113385 | 0.850773 | 0.712959 |
| Admin 1     | 2010 | 185.178   | -0.09621 | 0.169225 | 0.187396 | 0.449646 |
| Admin 1     | 2015 | 141       | -0.00825 | 0.069204 | 0.867662 | 0.928603 |
| Admin 2     | 2000 | 24        | 0.028997 | 0.099093 | 0.798014 | 0.58698  |
| Admin 2     | 2005 | 5.5618    | -0.00012 | 0.134105 | 0.809085 | 0.712959 |
| Admin 2     | 2010 | 8.32155   | -0.09621 | 0.184387 | 0.162311 | 0.449646 |
| Admin 2     | 2015 | 6         | -0.00825 | 0.089893 | 0.793993 | 0.928603 |

**Supplementary Table 42. Out of sample predictive metrics for mean years of education (women, ages 15–49), aggregated by fold to admin 0, admin 1, and admin 2**

| Aggregation | Year | Median SS | Mean Err | RMSE     | Corr.    | 95% Cov. |
|-------------|------|-----------|----------|----------|----------|----------|
| Admin 0     | 2000 | 13966     | -0.21718 | 0.454815 | 0.978911 | 0.998792 |
| Admin 0     | 2005 | 13247     | -0.49357 | 0.807787 | 0.955519 | 0.99595  |
| Admin 0     | 2010 | 16821     | -0.45568 | 0.864634 | 0.942702 | 0.998226 |
| Admin 0     | 2015 | 13894     | 0.129772 | 1.100053 | 0.825949 | 0.995274 |
| Admin 1     | 2000 | 1136.5    | -0.21718 | 0.540983 | 0.97335  | 0.998792 |
| Admin 1     | 2005 | 666.0305  | -0.49357 | 0.907992 | 0.954133 | 0.99595  |
| Admin 1     | 2010 | 1008      | -0.45568 | 0.990256 | 0.941877 | 0.998226 |
| Admin 1     | 2015 | 779       | 0.129772 | 1.181919 | 0.849278 | 0.995274 |
| Admin 2     | 2000 | 147       | -0.21718 | 0.855615 | 0.932814 | 0.998792 |
| Admin 2     | 2005 | 30.9308   | -0.49357 | 1.220395 | 0.917461 | 0.99595  |
| Admin 2     | 2010 | 45.9816   | -0.45568 | 1.265249 | 0.904898 | 0.998226 |
| Admin 2     | 2015 | 39        | 0.129772 | 1.382121 | 0.828785 | 0.995274 |

**Supplementary Table 43. Out of sample predictive metrics for mean years of education (women, ages 20–24), aggregated by fold to admin 0, admin 1, and admin 2**

| Aggregation | Year | Median SS | Mean Err | RMSE     | Corr.    | 95% Cov. |
|-------------|------|-----------|----------|----------|----------|----------|
| Admin 0     | 2000 | 2582      | -0.61007 | 1.506197 | 0.814281 | 0.995982 |
| Admin 0     | 2005 | 2472.404  | 0.738274 | 1.490048 | 0.821111 | 0.946285 |
| Admin 0     | 2010 | 2940      | 0.007172 | 1.755524 | 0.709886 | 0.97415  |
| Admin 0     | 2015 | 2554      | 0.842747 | 1.107054 | 0.887816 | 0.987735 |
| Admin 1     | 2000 | 224       | -0.61007 | 1.589455 | 0.813813 | 0.995982 |
| Admin 1     | 2005 | 119       | 0.738274 | 1.930784 | 0.75304  | 0.946285 |
| Admin 1     | 2010 | 193       | 0.007172 | 2.209842 | 0.651887 | 0.97415  |
| Admin 1     | 2015 | 138.11    | 0.842747 | 1.441946 | 0.785729 | 0.987735 |
| Admin 2     | 2000 | 24.1623   | -0.61007 | 1.780478 | 0.778246 | 0.995982 |
| Admin 2     | 2005 | 5.5624    | 0.738274 | 2.293885 | 0.686054 | 0.946285 |
| Admin 2     | 2010 | 8.897     | 0.007172 | 2.423214 | 0.627152 | 0.97415  |
| Admin 2     | 2015 | 5.7339    | 0.842747 | 1.873254 | 0.652194 | 0.987735 |

### 5.3.3 Post estimation calibration to national estimates

In order to leverage national-level data included in GBD 2017<sup>41</sup>, but outside the scope of our current geospatial modelling framework, and to ensure perfect calibration between our estimates and GBD 2017 national-level estimates, we performed a post hoc calibration to each of our 1,000 candidate maps. For each posterior draw we calculated population-weighted pixel aggregations to a national level and compared these country-year estimates to the GBD 2017 country-years. We defined the raking factor to be the ratio between the GBD 2017 estimate and our current estimates. Finally, we multiplied each of our pixels in a country-year by its associated raking factor. This ensured a perfect calibration between our geospatial estimates and GBD 2017 national-level estimates, while preserving our estimated within-country geospatial and temporal variation.

To allow comparison between our modelled estimates and the GBD 2017 national-level estimates to which they were calibrated, Supplementary Figs 76–91 plot mean uncalibrated estimates from the model-based geostatistics (MBG) process aggregated to the national-level (“MBG mean”) as compared to the GBD national estimates (“GBD mean”) for all modelled years.

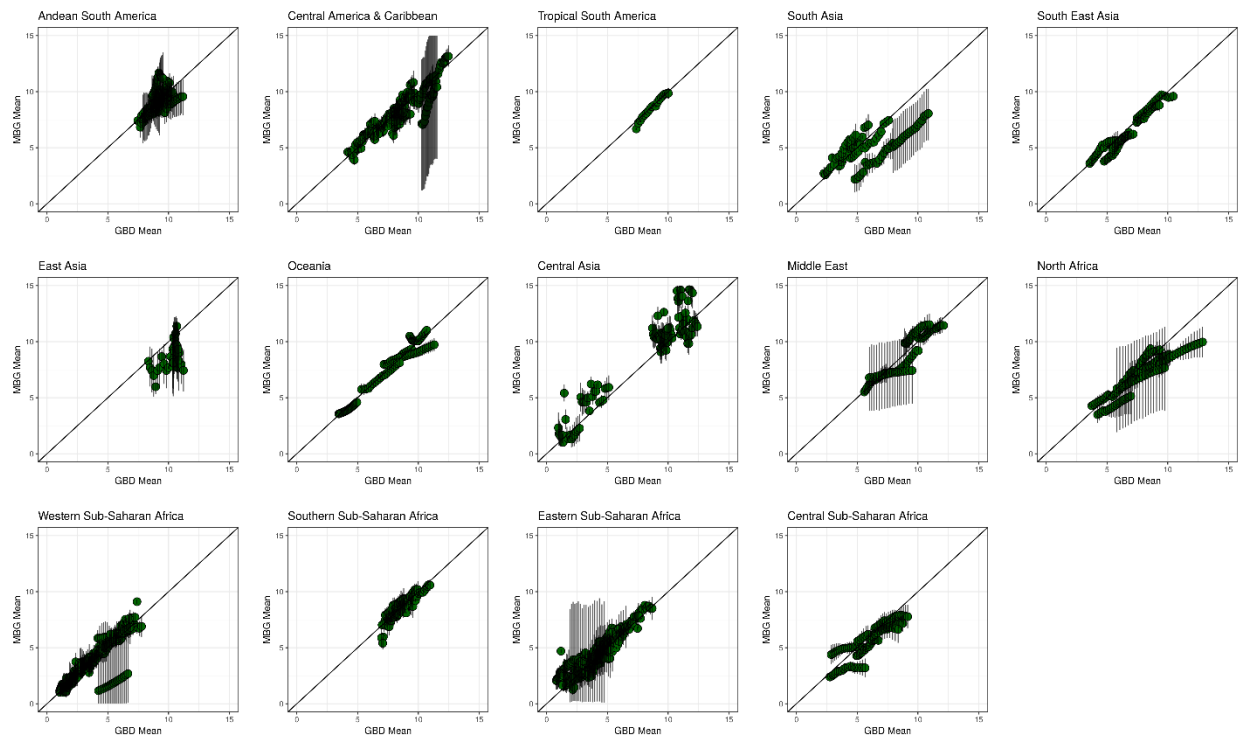

**Supplementary Figure 76. Mean years education (women, ages 15–49) comparison to GBD national estimates.**

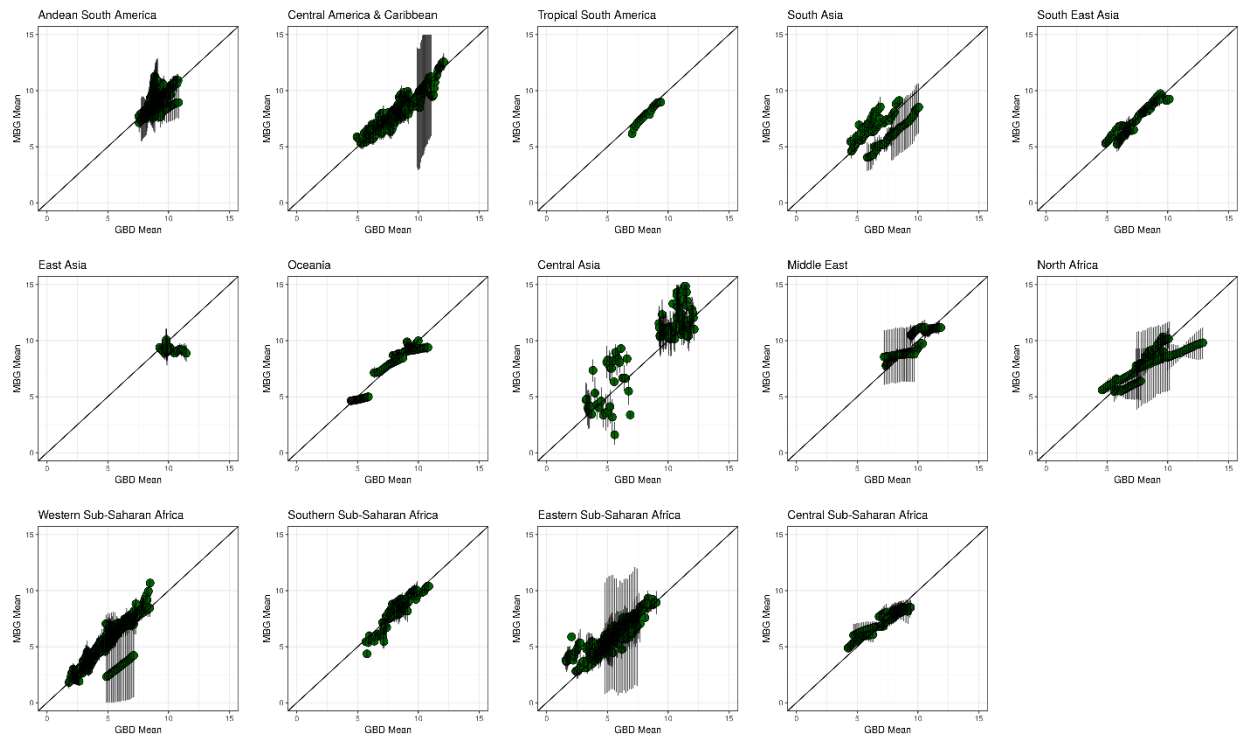

**Supplementary Figure 77. Mean years education (men, ages 15–49) comparison to GBD national estimates.**

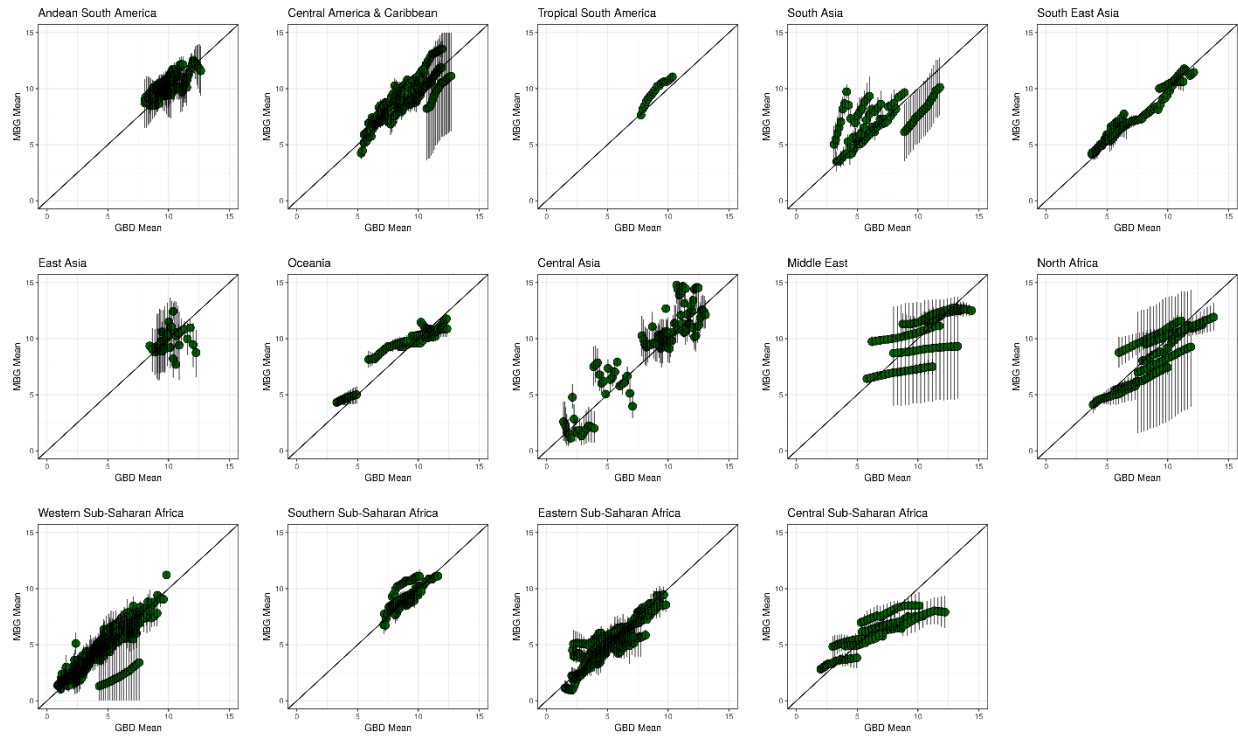

**Supplementary Figure 78. Mean years education (women, ages 20–24) comparison to GBD national estimates.**



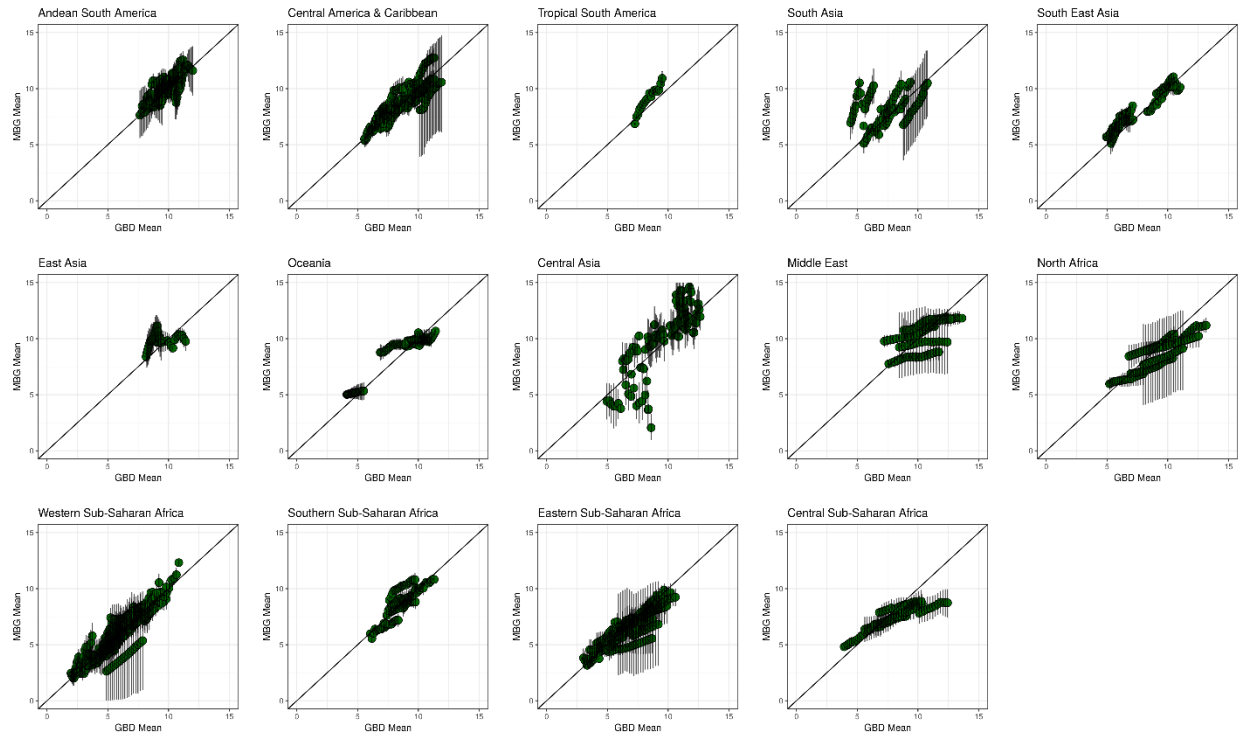

**Supplementary Figure 79. Mean years education (men, ages 20–24) comparison to GBD national estimates.**

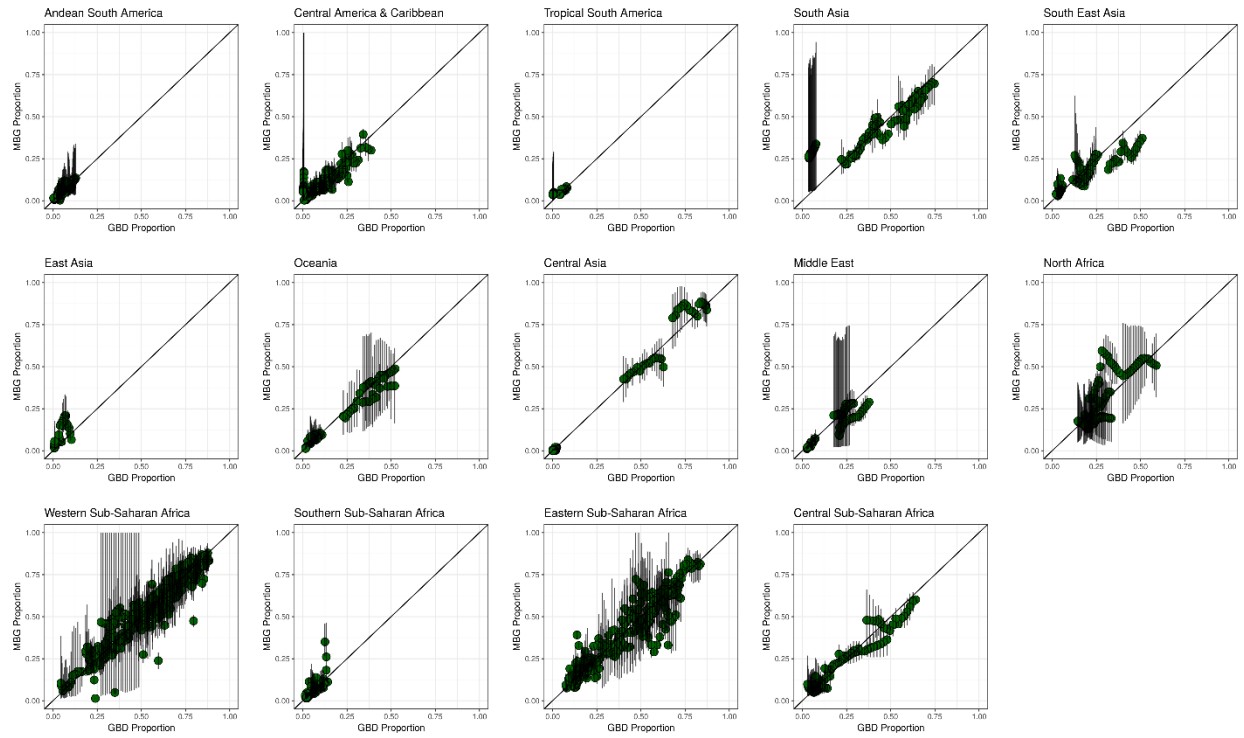

**Supplementary Figure 80. Zero years of education (women, ages 15–49) comparison to GBD national estimates.**

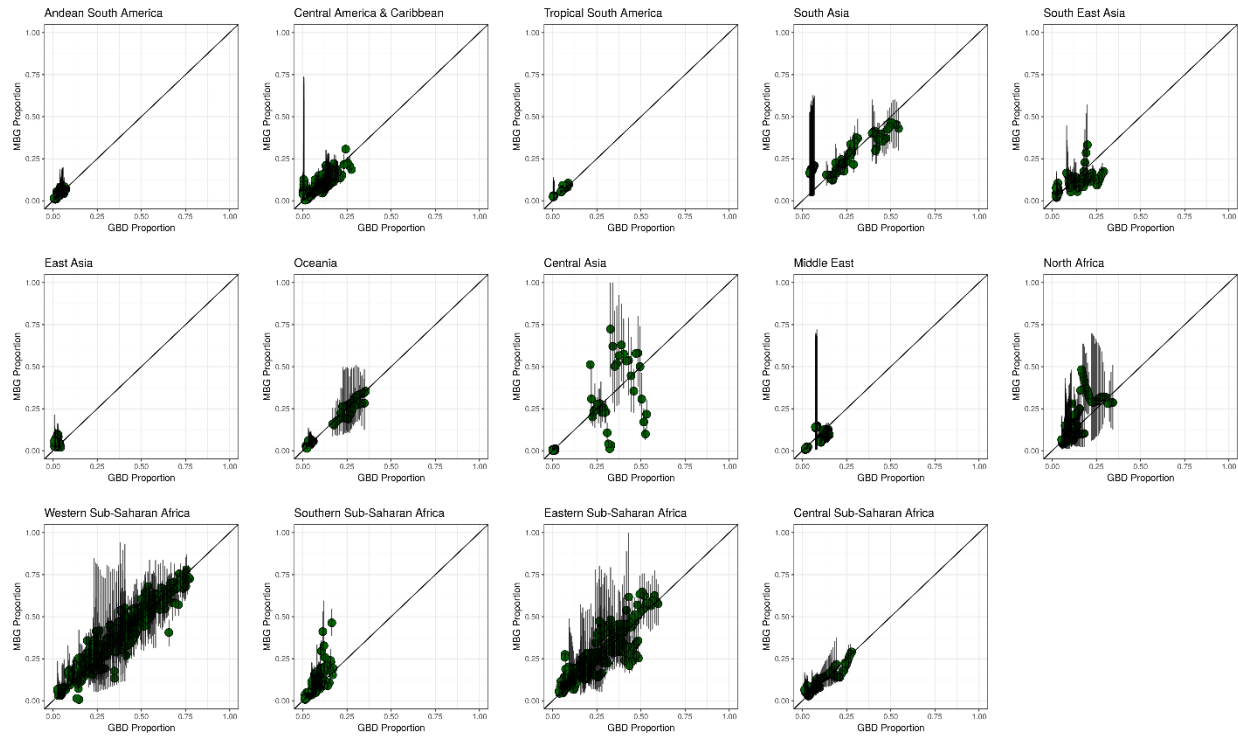

**Supplementary Figure 81. Zero years of education (men, ages 15–49) comparison to GBD national estimates.**

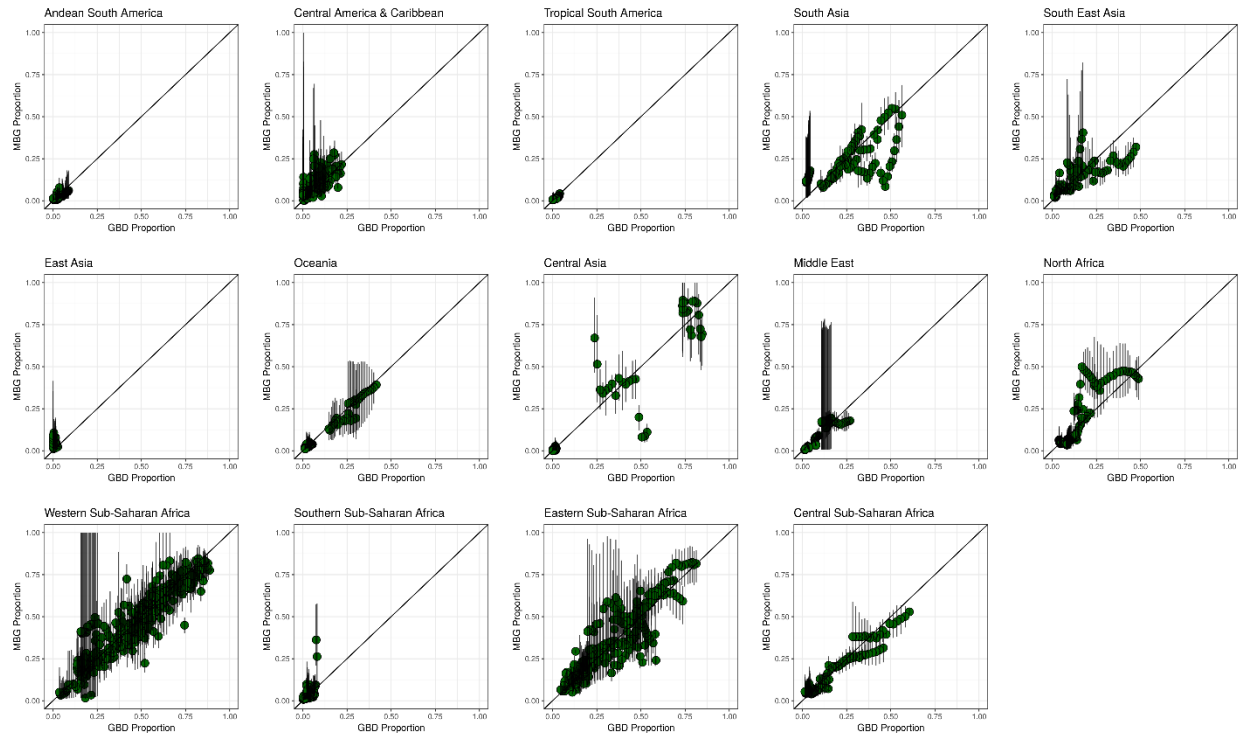

**Supplementary Figure 82. Zero years of education (women, ages 20–24) comparison to GBD national estimates.**

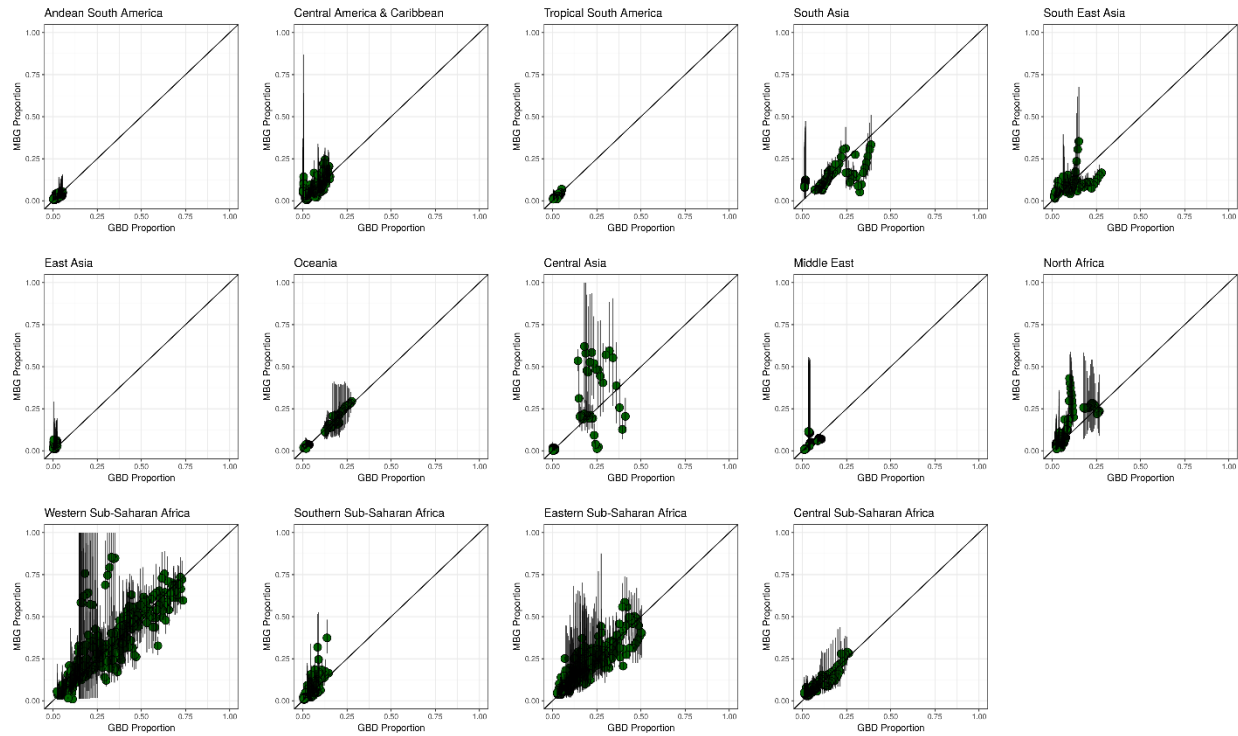

**Supplementary Figure 83. Zero years of education (men, ages 20–24) comparison to GBD national estimates.**

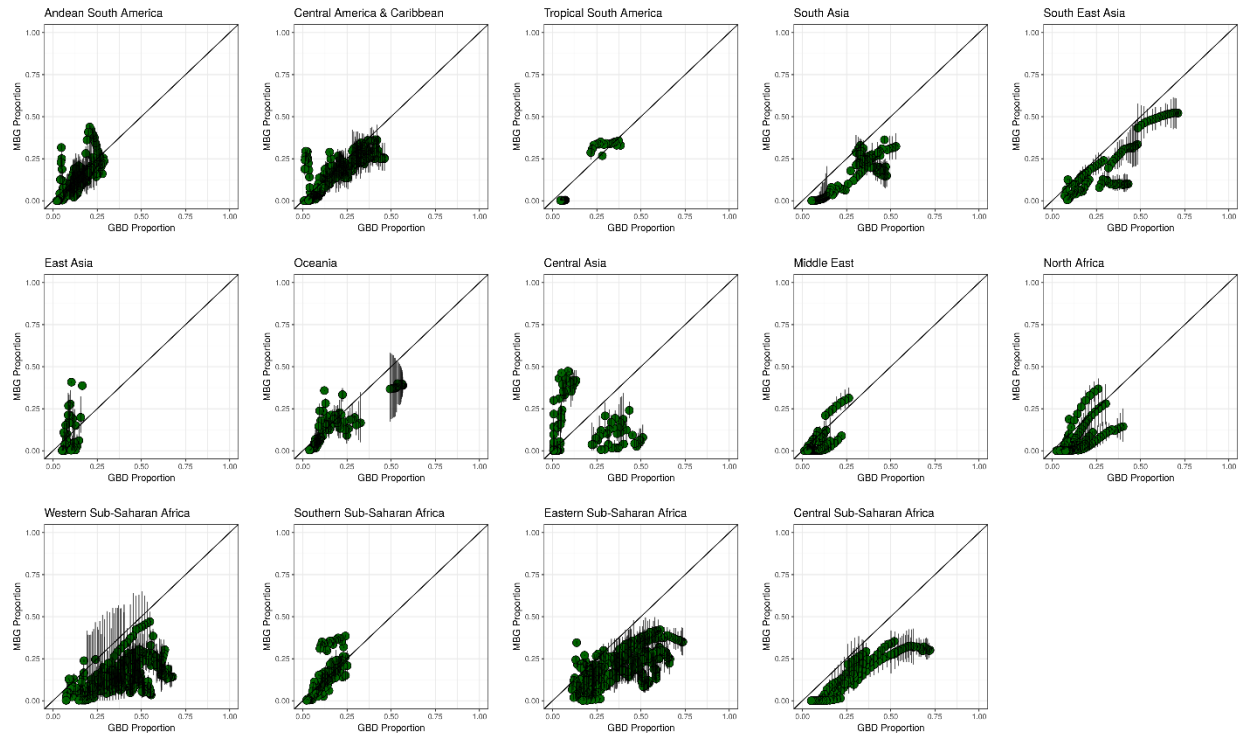

**Supplementary Figure 84. 1–6 years of education (women, ages 15–49) comparison to GBD national estimates.**

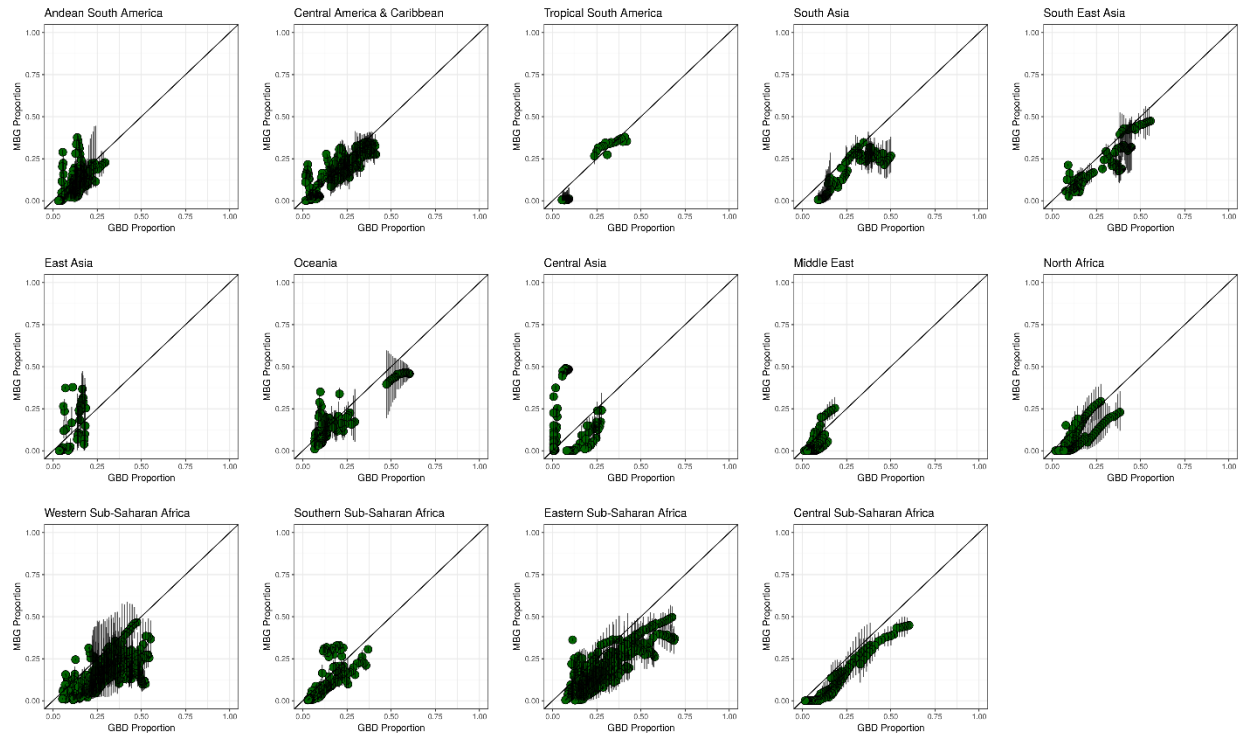

**Supplementary Figure 85. 1–6 years of education (men, ages 15–49) comparison to GBD national estimates.**

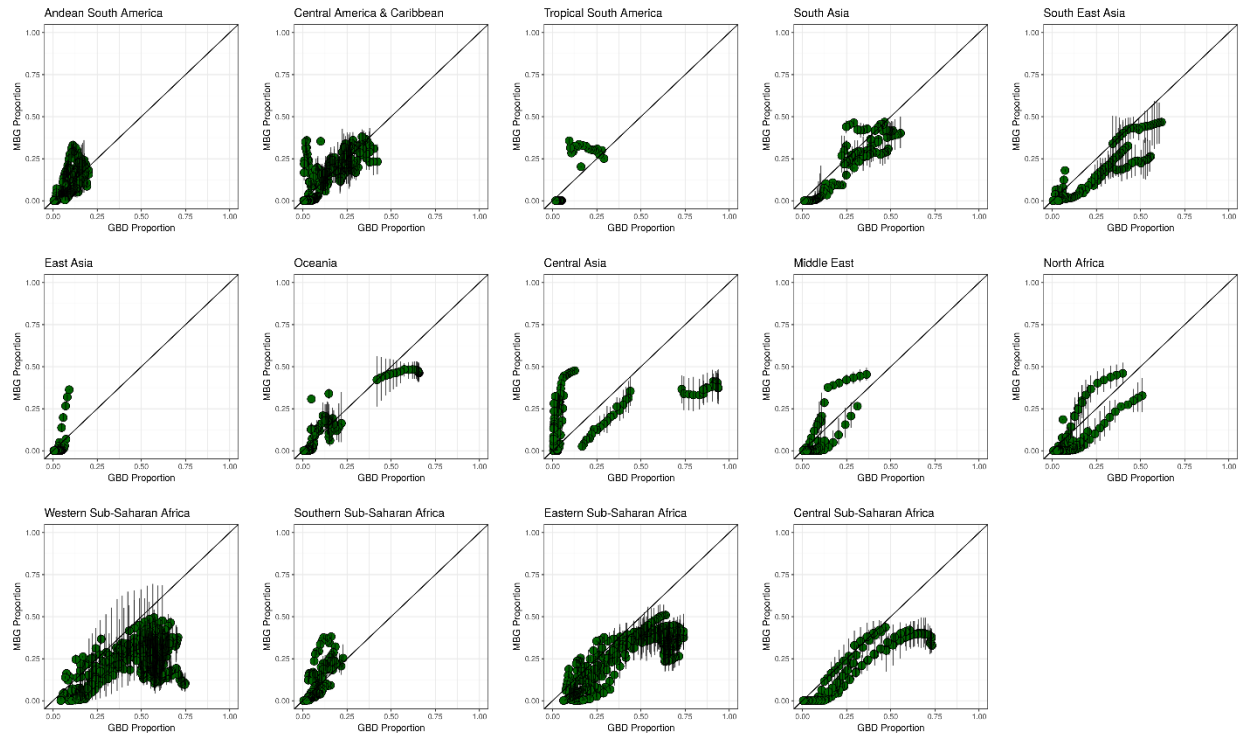

**Supplementary Figure 86. 1–6 years of education (women, ages 20–24) comparison to GBD national estimates.**



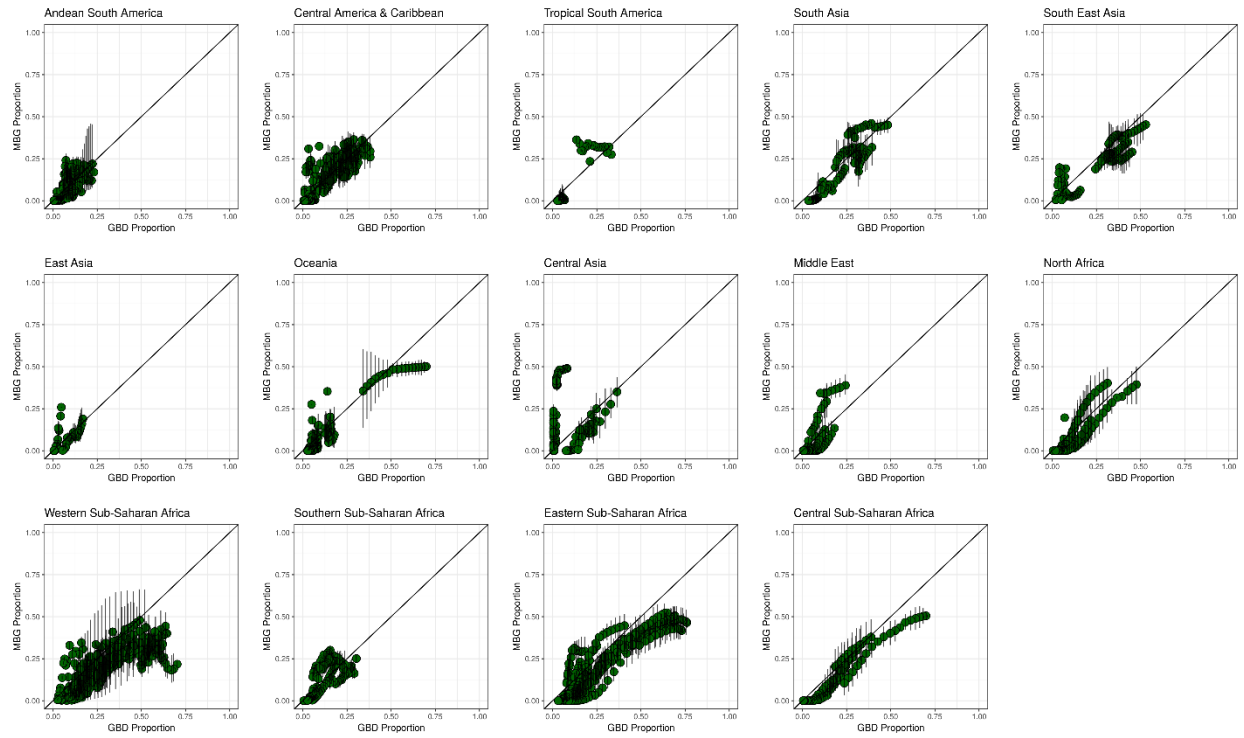

**Supplementary Figure 87. 1–6 years of education (men, ages 20–24) comparison to GBD national estimates.**

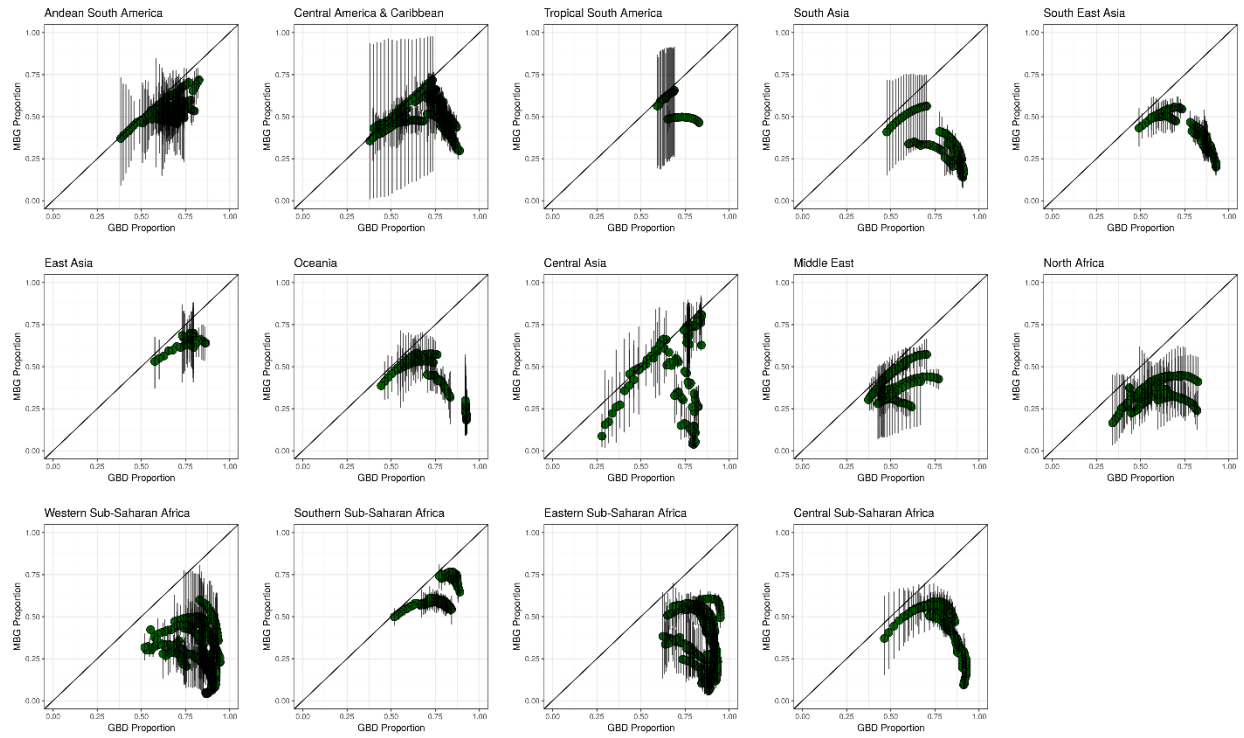

**Supplementary Figure 88. 6–11 years of education (women, ages 15–49) comparison to GBD national estimates.**

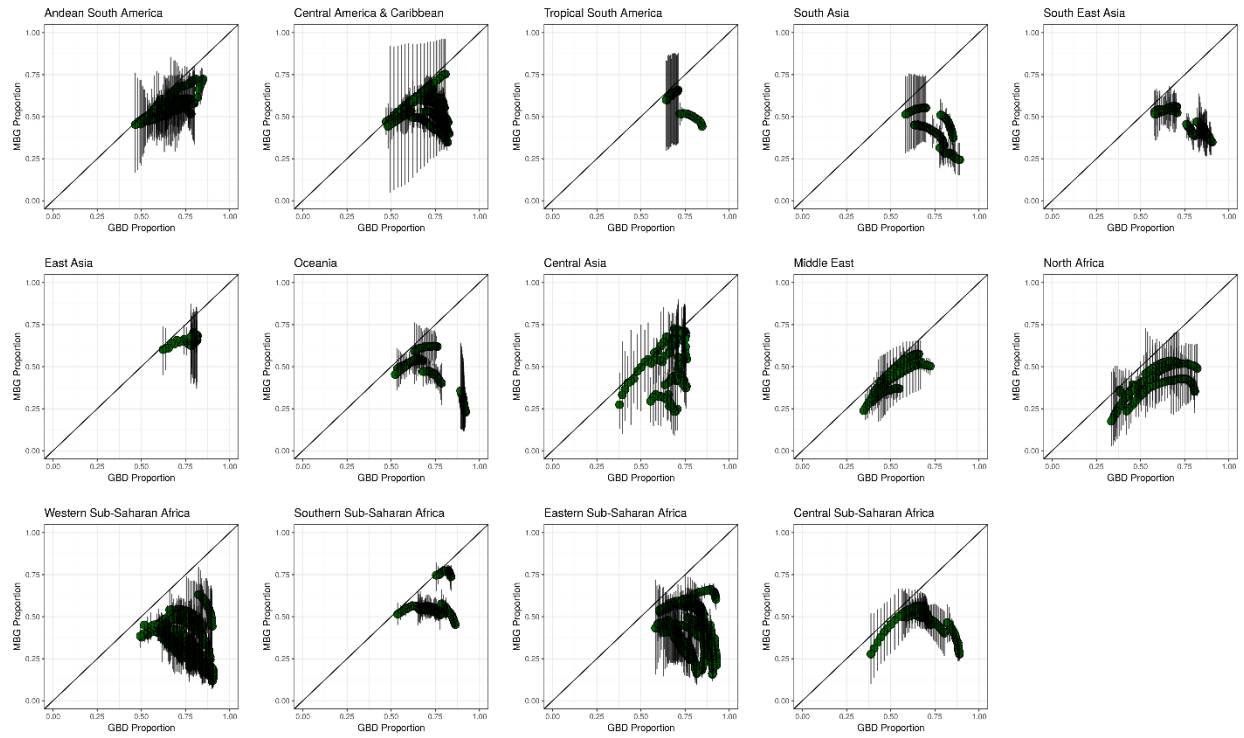

**Supplementary Figure 89. 6–11 years of education (men, ages 15–49) comparison to GBD national estimates.**

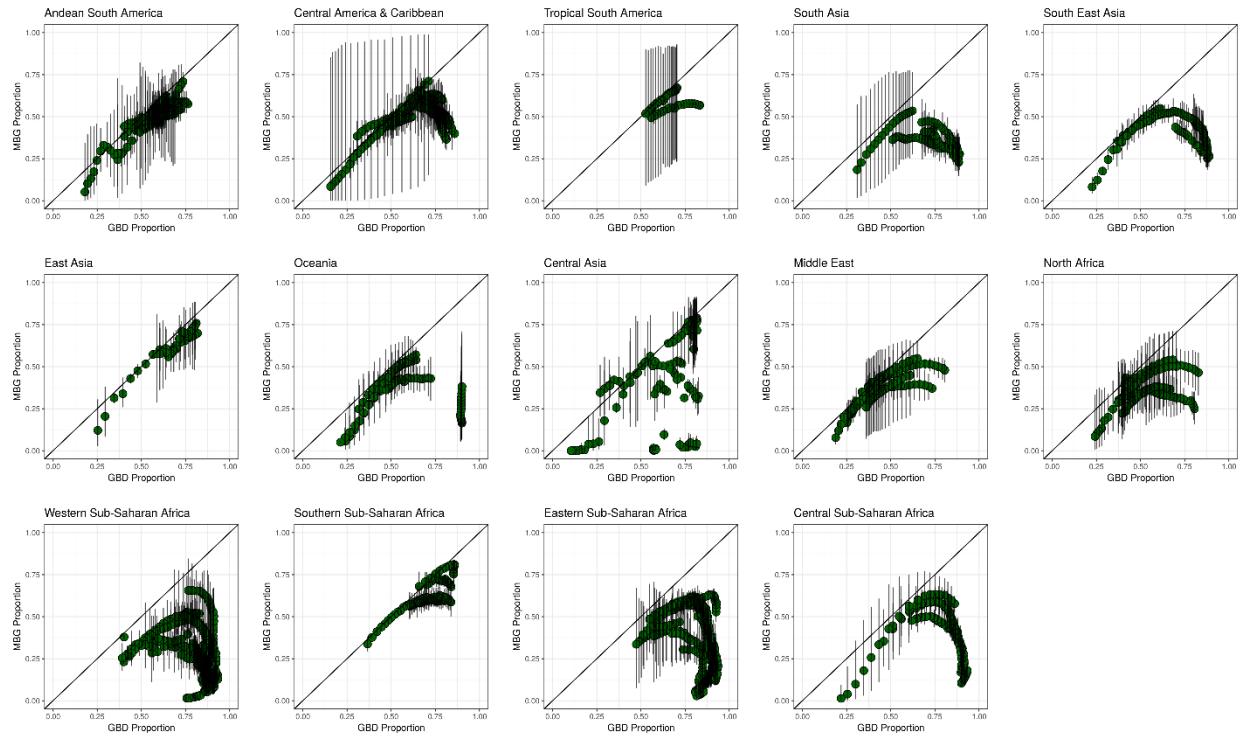

**Supplementary Figure 90. 6–11 years of education (women, ages 20–24) comparison to GBD national estimates.**

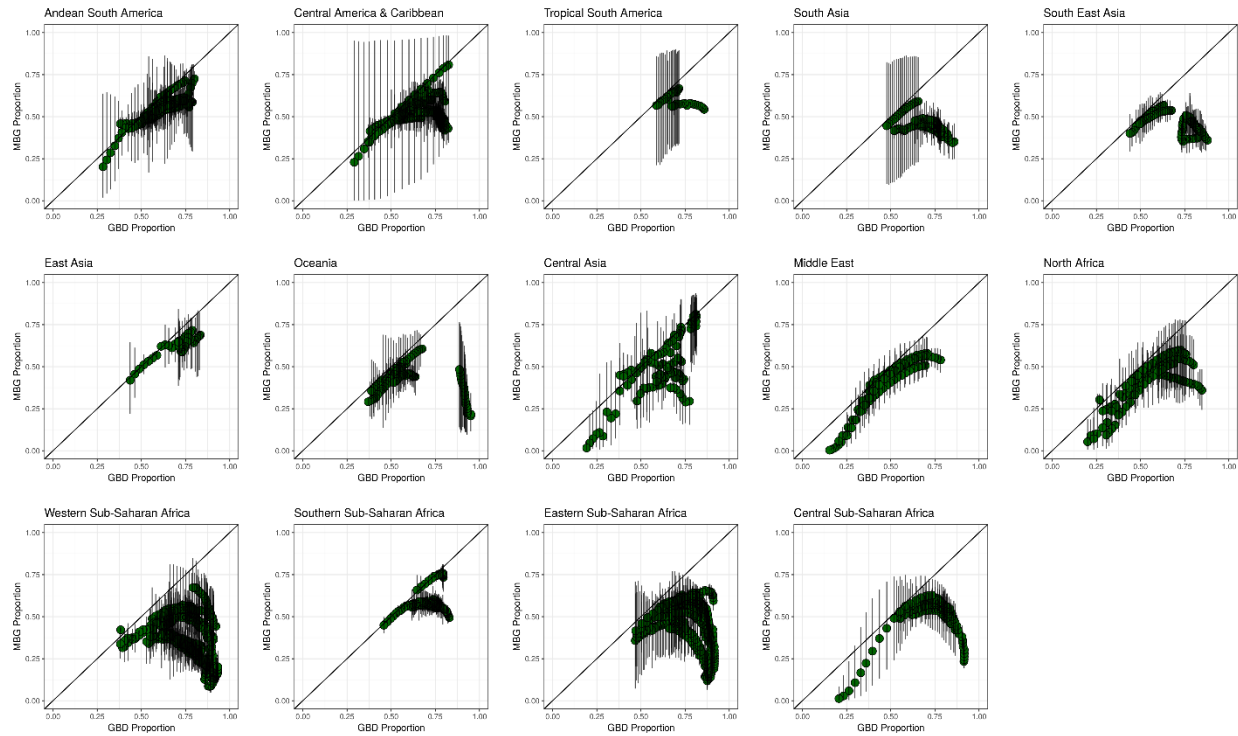

**Supplementary Figure 91. 6–11 years of education (men, ages 20–24) comparison to GBD national estimates.**

**Supplementary Table 44. Quartiles for raking factors (RF) from MBG to GBD estimates for all indicators**

| Indicator                | 1 <sup>st</sup> Quartile RF | Median RF | 3 <sup>rd</sup> Quartile RF |
|--------------------------|-----------------------------|-----------|-----------------------------|
| Mean years, 15–49 male   | 0.917                       | 0.998     | 1.084                       |
| Mean years, 15–49 female | 0.888                       | 0.977     | 1.047                       |
| Mean years, 20–24 female | 0.961                       | 1.030     | 1.100                       |
| Mean years, 20–24 male   | 0.953                       | 1.026     | 1.113                       |
| Zero years, 15–49 female | 0.751                       | 1.120     | 1.144                       |
| Zero years, 15–49 male   | 0.701                       | 0.932     | 1.154                       |
| Zero years, 20–24 female | 0.681                       | 0.913     | 1.189                       |
| Zero years, 20–24 male   | 0.786                       | 1.001     | 1.257                       |
| 1–5 years, 15–49 female  | 0.755                       | 0.930     | 1.123                       |
| 1–5 years, 15–49 male    | 0.731                       | 1.055     | 1.115                       |
| 1–5 years, 20–24 female  | 0.694                       | 0.981     | 1.278                       |
| 1–5 years, 20–24 male    | 0.672                       | 0.904     | 1.162                       |
| 6–11 years, 15–49 female | 0.9312                      | 0.996     | 1.072                       |
| 6–11 years, 15–49 male   | 0.941                       | 0.983     | 1.078                       |
| 6–11 years, 20–24 female | 0.890                       | 1.086     | 1.107                       |
| 6–11 years, 20–24 male   | 0.879                       | 1.091     | 1.066                       |

#### 5.3.4 Aggregation to first- and second-level administrative subdivisions

In addition to estimates of educational attainment on a grid, we also constructed estimates of attainment for first- and second-level administrative subdivisions. These estimates were derived by calculating population-weighted averages of each indicator for each grid cell or fractional grid cell within a given first- or second-level administrative subdivision. Grid cell fractions were assigned through intersection as described above and this process utilized the calibrated population estimates and prevalence draws also described above. This was carried out for each of the 1,000 posterior draws at the grid cell level, generating 1,000 posterior draws for each administrative subdivision. Final point estimates and uncertainty intervals for each subdivision at each level of the administrative hierarchy were derived from the mean, 2.5<sup>th</sup> percentile, and 97.5<sup>th</sup> percentile of these draws, respectively.

#### 5.3.5 Calculating people with zero years of education

We estimated the number of people with zero education in each grid cell and year by combining estimated population and proportion of population with zero education after calibration to GBD as described above. Specifically, for each cell and fractional cell, we multiplied the estimated population by each of the 1,000 prevalence draws to generate 1,000 draws of people with zero education. Final point estimates and uncertainty intervals for people with zero education were calculated as the mean, 2.5<sup>th</sup> percentile, and 97.5<sup>th</sup> percentile of these draws, respectively.

## 6.0 Supplementary references

1. UNESCO. Meeting our commitments to gender equality in education. *Glob. Educ. Monit. Rep.* (2018).
2. Nilsson, M., Griggs, D. & Visbeck, M. Policy: Map the interactions between Sustainable Development Goals. *Nature* **534**, 320 (2016).
3. The World Bank. *Abolishing School Fees in Africa*. [https://www.unicef.org/publications/files/Abolishing\\_School\\_Fees\\_in\\_Africa.pdf](https://www.unicef.org/publications/files/Abolishing_School_Fees_in_Africa.pdf) (2009).
4. UNESCO. *Is real progress being made in the equitable provision of education? #PISAresults*. (2017).
5. DiGirolamo, A. M., Stansbery, P. & Lung'aho, M. Advantages and challenges of integration: opportunities for integrating early childhood development and nutrition programming. *Ann. N. Y. Acad. Sci.* **1308**, 46–53 (2014).
6. Caldwell, J. C. How is greater maternal education translated into lower child mortality? *Source Health Transit. Rev.* **4**, 224–229 (1994).
7. Caldwell, J. C. Education as a Factor in Mortality Decline An Examination of Nigerian Data. *Popul. Stud.* **33**, 395 (1979).
8. Gakidou, E., Cowling, K., Lozano, R. & Murray, C. J. L. Increased educational attainment and its effect on child mortality in 175 countries between 1970 and 2009: a systematic analysis. *The Lancet* **376**, 959–974 (2010).
9. Jejeebhoy, S. J. *Women's education, autonomy, and reproductive behaviour : experience from developing countries*. (Clarendon Press, 1995).
10. Desai, S. & Alva, S. Maternal Education and Child Health: Is There a Strong Causal Relationship? *Demography* **35**, 71 (1998).
11. Basu, A. M. & Stephenson, R. Low levels of maternal education and the proximate determinants of childhood mortality: a little learning is not a dangerous thing. *Soc. Sci. Med.* **60**, 2011–2023 (2005).
12. LeVine, R. A., LeVine, S., Schnell-Anzola, B., Rowe, M. L. & Dexter, E. *Literacy and Mothering How Women's Schooling Changes the Lives of the World's Children*. (Oxford University Press, 2012). doi:10.1093/acprof:oso/9780195309829.001.0001.
13. Ruel, M. T. & Alderman, H. Nutrition-sensitive interventions and programmes: how can they help to accelerate progress in improving maternal and child nutrition? *The Lancet* **382**, 536–551 (2013).
14. Pamuk, E., Fuchs, R. & Lutz, W. Comparing Relative Effects of Education and Economic Resources on Infant Mortality in Developing Countries. *Popul. Dev. Rev.* **37**, 637–664 (2011).
15. Klasen, S. Does Gender Inequality Reduce Growth and Development? Evidence from Cross-Country Regressions. (2000).
16. Klasen, S. Low Schooling for Girls, Slower Growth for All? Cross-Country Evidence on the Effect of Gender Inequality in Education on Economic Development. *World Bank Econ. Rev.* **16**, 345–373 (2002).

17. Klasen, S. & Lamanna, F. The Impact of Gender Inequality in Education and Employment on Economic Growth: New Evidence for a Panel of Countries. *Fem. Econ.* **15**, 91–132 (2009).
18. Nations, U. Transforming our world: The 2030 agenda for sustainable development. *Resolut. Adopt. Gen. Assem.* (2015).
19. Horton, R. & Lo, S. Nutrition: a quintessential sustainable development goal. *The Lancet* **382**, 371–372 (2013).
20. Osgood-Zimmerman, A. *et al.* Mapping child growth failure in Africa between 2000 and 2015. *Nature* **555**, 41–47 (2018).
21. Golding, N. *et al.* Mapping under-5 and neonatal mortality in Africa, 2000–15: a baseline analysis for the Sustainable Development Goals. *The Lancet* **390**, 2171–2182 (2017).
22. Annan, K. Data can help to end malnutrition across Africa. *Nature* **555**, 7 (2018).
23. Horton, R. Offline: In defence of precision public health. *The Lancet* **392**, 1504 (2018).
24. Dowell, S. F., Blazes, D. & Desmond-Hellmann, S. Four steps to precision public health. *Nature* **540**, 181–191 (2016).
25. Barro, R. J. & Lee, J. W. A new data set of educational attainment in the world, 1950–2010. *J. Dev. Econ.* **104**, 184–198 (2013).
26. Friedman, J., Graetz, N. & Gakidou, E. Improving the estimation of educational attainment: New methods for assessing average years of schooling from binned data. *PLOS ONE* **13**, e0208019 (2018).
27. UNESCO. ISCED Mappings. <http://uis.unesco.org/en/isced-mappings> (2016).
28. Thomas Lumley. Survey analysis in R. <http://r-survey.r-forge.r-project.org/survey/> (2014).
29. Lumley, T. Simple and Stratified Sampling. in *Complex Surveys* 17–37 (John Wiley & Sons, Inc., 2010).
30. Tatem, A. J. WorldPop, open data for spatial demography. *Sci. Data* **4**, 170004 (2017).
31. Bhatt, S. *et al.* Improved prediction accuracy for disease risk mapping using Gaussian Process stacked generalisation. *J. R. Soc. Interface* **14**, (2017).
32. Murray, C. J. *et al.* GBD 2010: design, definitions, and metrics. *The Lancet* **380**, 2063–2066 (2012).
33. Hosmer DW, Lemeshow S, S. R. Ordinal Logistic Regression Models. in *Applied logistic regression* 289–305 (Wiley, 2013).
34. Stein, M. L. *Interpolation of Spatial Data*. (Springer New York, 1999).
35. Diggle, P. & Ribeiro, P. J. *Model-based Geostatistics*. (Springer-Verlag New York, 2007).
36. Rue, H. *et al.* INLA: Functions Which Allow to Perform Full Bayesian Analysis of Latent Gaussian Models Using Integrated Nested Laplace Approximation. (2014).
37. Blangiardo, M., Cameletti, M., Baio, G. & Rue, H. *et al.* Spatial and spatio-temporal models with R-INLA. *Spat. Spatio-Temporal Epidemiol.* **7**, 39–55 (2013).
38. Cameletti, M., Lindgren, F., Simpson, D. & Rue, H. *et al.* Spatio-temporal modeling of particulate matter concentration through the SPDE approach. *AStA Adv. Stat. Anal.* **97**, 109–131 (2013).
39. Alegana, V. A. *et al.* Fine resolution mapping of population age-structures for health and development applications. *J. R. Soc. Interface* **12**, 20150073–20150073 (2015).



40. Patil, A. P., Gething, P. W., Piel, F. B. & Hay, S. I. Bayesian geostatistics in health cartography: the perspective of malaria. *Trends Parasitol.* **27**, 246–253 (2011).
41. Gakidou, E. *et al.* Global, regional, and national comparative risk assessment of 84 behavioural, environmental and occupational, and metabolic risks or clusters of risks, 1990–2016: a systematic analysis for the Global Burden of Disease Study 2016. *The Lancet* **390**, 1345–1422 (2017).

## 7.0 Authors' contributions

Managing the estimation or publications process

Amber Sligar and Aubrey J Levine.

Writing the first draft of the manuscript

Nicholas Graetz, Lauren Woyczynski, and Simon I Hay.

Primary responsibility for this manuscript focused on: applying analytical methods to produce estimates

Lauren Woyczynski, Nicholas Graetz, Michael Collison, Nathaniel J Henry, Roy Burstein, Laura Dwyer-Lindgren, Ani Deshpande, Damaris Kinyoki, and Jon Mosser.

Primary responsibility for this manuscript focused on: seeking, cataloguing, extracting, or cleaning data; designing or coding figures and tables

Kate F Wilson, Jason B Hall, John C Wilkinson, and Lucas Earl.

Managing the overall research enterprise

Farah Daoud, Aubrey J Levine, George Mensah, Ali H Mokdad, Christopher J L Murray, Benn Sartorius, Megan F Schipp, Amber Sligar, Emmanuela Gakidou, and Simon I Hay.

Providing data or critical feedback on data sources

Jason B Hall, Kalkidan Hassen Abate, Foad Abd-Allah, Oladimeji Adebayo, Fares Alahdab, Mehran Alijanzadeh, Khalid Altirkawi, Catalina Liliana Andrei, Mina Anjomshoa, Jalal Arabloo, Olatunde Aremu, Bahram Armoon, Marcel Ausloos, Ashish Awasthi, Beatriz Paulina Ayala Quintanilla, Samad Azari, Neeraj Bedi, Somayah Bohlouli, Gabrielle Britton, Roy Burstein, Zahid Butt, Luis Cámara, Carlos Castañeda-Orjuela, Franz Castro, Cyrus Cooper, Aso Darwesh, Rajat Das Gupta, Jan-Walter De Neve, Kebede Deribe, Manisha Dubey, Lucas Earl, Ziad El-Khatib, Anwar Faraj, Mohammad Fareed, Andre Faro, Irina Filip, Takeshi Fukumoto, Sameer Gopalani, Ayman Grada, Hamid Y Hassen, Claudiu Herteliu, Long Hoang Nguyen, Michael Hole, Mehdi Hosseinzadeh, Guoqing Hu, Sheikh Mohammed Shariful Islam, Nader Jafaribalalami, Mihajlo Jakovljevic, John Ji, Jost B Jonas, Jacek Jozwiak, Tanuj Kanchan, Amir Kasaeian, Amir Kasaeian, Peter Keiyoro, Yousef Khader, Morteza Abdullatif Khafaie, Ali Kiadaliri, Yun Jin Kim, Adnan Kisa, Kewal Krishan, Barthelemy Kuate Defo, Pushpendra Kumar, Paul Lee, Yu Liao, Lee-Ling Lim, Jaifred Christian Lopez, Francisco Rogerlândio Martins-Melo, Anthony Masaka, Benjamin Massenburg, Benjamin Mayala, Walter Mendoza, Tuomo Meretoja, Ted R Miller, Erkin Mirrakhimov, Babak Moazen, Dara Mohammad, Naser Mohammad Gholi Mezerji, Shafiu Mohammed, Ali Mokdad, Lorenzo Monasta, Maziar Moradi-Lakeh, Seyyed Meysam Mousavi, Christopher J L Murray, Ghulam Mustafa, Seyed Sina Naghibi Irvani, Ionut Negoii, Josephine Ngunjiri, Malihe Nourollahpour Shiadeh, Felix Ogbo, Andrew T Olagunju, Bolajoko Olusanya, Jacob Olusanya, Obinna Onwujekwe, Eduardo Ortiz-Panozo, Mahesh P A, Adrian Pana, Songhomitra Panda-Jonas, Sanghamitra Pati, Maarten Postma, Mostafa Qorbani, Amir Radfar, Fakher Rahim, Fatemeh Rajati, Chhabi Lal Ranabhat, David Rawaf, Salman Rawaf, Carlos Rios-González, Leonardo Roever, Gholamreza Roshandel, Ali Rostami, Enrico Rubagotti, Ehsan Sadeghi, Rajesh Sagar, Nasir Salam, Payman Salamati, Hamideh Salimzadeh, Abdallah M Samy, Juan Sanabria, David C Schwebel, Masood Ali Shaikh, Mehran Shams-Beyranvand, Morteza Shamsizadeh, Mehdi Sharif, Soraya Siabani, Dhirendra Narain Sinha, Ireneous Soyiri, Chandrashekhar T Sreeramareddy, Agus Sudaryanto, Cuong Tat Nguyen, Mohamad-Hani Temsah, Abdullah Terkawi, Zemenu Tessema, Giang Thu

Vu, Marcos Roberto Tovani-Palone, Bach Tran, Irfan Ullah, Pascual Valdez, Yousef Veisani, Vasiliy Vlassov, Yasir Waheed, John Wilkinson, Charles Wolfe, Tomohide Yamada, Alex Yeshaneh, Naohiro Yonemoto, Mustafa Younis, Chuanhua Yu, Yunquan Zhang, Sanjay Zodpey, Emmanuela Gakidou, and Simon I Hay.

#### Development of methods or computational machinery

Katherine F Wilson, Jason B Hall, Samad Azari, Roy Burstein, Michael Collison, Michael A Cork, Aso Darwesh, Aniruddha Deshpande, Lucas Earl, Anwar Faraj, Nathaniel Henry, Mehdi Hosseinzadeh, Nader Jafaribalalami, Adnan Kisa, Ali Mokdad, Jonathan Mosser, Christopher J L Murray, Chhabi Lal Ranabhat, Robert Reiner, Carlos Rios-González, Abdallah M Samy, Mehdi Sharif, Emmanuela Gakidou, and Simon I Hay.

#### Providing critical feedback on methods or results

Jason B Hall, Kalkidan Hassen Abate, Foad Abd-Allah, Oladimeji Adebayo, Victor Adekanmbi, Mahdi Afshari, Fares Alahdab, Ziyad Al-Aly, Jacqueline Alcalde Rabanal, Vahid Alipour, Khalid Altirkawi, Nahla Anber, Catalina Liliana Andrei, Mina Anjomshoa, Carl Abelardo T Antonio, Jalal Arabloo, Olatunde Aremu, Suleman Atique, Marcel Ausloos, Ashish Awasthi, Beatriz Paulina Ayala Quintanilla, Samad Azari, Alaa Badawi, Joseph Banoub, Suzanne Barker-Collo, Derrick Bennett, Natalia Bhattacharjee, Krittika Bhattacharyya, Suraj Bhattarai, Ali Bijani, Boris Bikbov, Somayeh Bohlouli, Gabrielle Britton, Roy Burstein, Zahid Butt, Luis Cámara, Rosario Cárdenas, Félix Carvalho, Franz Castro, Ester Cerin, Jung-Chen Chang, Cyrus Cooper, Michael A Cork, Farah Daoud, Aso Darwesh, Rajat Das Gupta, Jan-Walter De Neve, Kebede Deribe, Beruk Desalegn, Aniruddha Deshpande, Melaku Desta, Daniel Diaz, Shirin Djalalinia, Manisha Dubey, Andre Duraes, Mohammad Ebrahimi Kalan, Ziad El-Khatib, Anwar Faraj, Mahbobeh Faramarzi, Mohammad Fareed, Andre Faro, Seyed-Mohammad Fereshtehnejad, Eduarda Fernandes, Irina Filip, Florian Fischer, Takeshi Fukumoto, Paramjit Gill, Philimon Gona, Sameer Gopalani, Ayman Grada, Yuming Guo, Rajeev Gupta, Vipin Gupta, Arvin Haj-Mirzaian, Arya Haj-Mirzaian, Samer Hamidi, Mehedi Hasan, Hamid Y Hassen, Delia Hendrie, Nathaniel Henry, Bernardo Hernandez, Claudiu Herteliu, Long Hoang Nguyen, Michael Hole, Naznin Hossain, Mehdi Hosseinzadeh, Guoqing Hu, Olayinka Ilesanmi, Sheikh Mohammed Shariful Islam, Neda Izadi, Nader Jafaribalalami, Mihajlo Jakovljevic, Ravi Prakash Jha, John Ji, Jost B Jonas, Zahra Jorjoran Shushtari, Jacek Jozwiak, Tanuj Kanchan, Amir Kasaeian, Amir Kasaeian, Peter Keiyoro, Yousef Khader, Morteza Abdullatif Khafaie, Ejaz Khan, Mona Khater, Ali Kiadaliri, Yun Jin Kim, Ruth Kimokoti, Damaris Kinyoki, Adnan Kisa, Hamidreza Komaki, Ai Koyanagi, Kewal Krishan, Barthelemy Kuate Defo, Manasi Kumar, Pushpendra Kumar, Faris Lami, Shanshan Li, Yu Liao, Lee-Ling Lim, Stefan Listl, Jaifred Christian Lopez, Reza Malekzadeh, Mohammad Ali Mansournia, Francisco Rogerlândio Martins-Melo, Anthony Masaka, Benjamin Massenburg, Benjamin Mayala, Kala M Mehta, Walter Mendoza, George Mensah, Tuomo Meretoja, Ted R Miller, Gk Mini, Erkin Mirrakhimov, Babak Moazen, Dara Mohammad, Naser Mohammad Gholi Mezerji, Shafiu Mohammed, Farnam Mohebi, Ali Mokdad, Lorenzo Monasta, Yoshan Moodley, Mahmood Moosazadeh, Ghobad Moradi, Maziar Moradi-Lakeh, Paula Moraga, Lidia Morawska, Shane Morrison, Jonathan Mosser, Seyyed Meysam Mousavi, Christopher J L Murray, Ghulam Mustafa, Seyed Sina Naghibi Irvani, Farid Najafi, Duduzile Ndwandwe, Ionut Negoj, Ruxandra Irina Negoj, Josephine Ngunjiri, Dina Nur Anggraini Ningrum, Malihe Nourollahpour Shiadeh, Felix Ogbo, Andrew T Olagunju, Bolajoko Olusanya, Jacob Olusanya, Obinna Onwujekwe, Doris V Ortega-Altamirano, Eduardo Ortiz-Panozo, Simon Øverland, Mahesh P A, Adrian Pana, Songhomitra Panda-Jonas, Sanghamitra Pati, George Patton, Norberto Perico, David Pigott, Meghdad Pirsaeheb, Maarten Postma, Akram Pourshams, Mostafa Qorbani, Amir Radfar,

Fakher Rahim, Vafa Rahimi-Movaghar, Chhabi Lal Ranabhat, David Rawaf, Salman Rawaf, Robert Reiner, Giuseppe Remuzzi, Andre Renzaho, Aziz Rezapour, Carlos Rios-González, Leonardo Roever, Gholamreza Roshandel, Ali Rostami, Enrico Rubagotti, Ehsan Sadeghi, Yahya Safari, Roya Safari-Faramani, Rajesh Sagar, Payman Salamati, Yahya Salimi, Hamideh Salimzadeh, Abdallah M Samy, Juan Sanabria , Milena Santric-Milicevic, Benn Sartorius, Brijesh Sathian, Lauren Schaeffer, David C Schwebel, Sadaf Sepanlou, Masood Ali Shaikh, Mehran Shams-Beyranvand, Morteza Shamsizadeh, Kiomars Sharafi, Mehdi Sharif, Rajesh Sharma, Aziz Sheikh, Mika Shigematsu, Soraya Siabani, Jasvinder Singh, Dharendra Narain Sinha, Joan B Soriano, Ireneous Soyiri, Chandrashekhar T Sreeramareddy, Agus Sudaryanto, Muawiyah Babale Sufiyan, Ipsita Sutradhar , Pn Sylaja, Rafael Tabarés-Seisdedos, Birkneh Tilahun Tadesse, Cuong Tat Nguyen, Zemenu Tessema, Giang Thu Vu, Marcos Roberto Tovani-Palone, Bach Tran, Lorainne Tudor Car, Irfan Ullah, Pascual Valdez, Vasiliy Vlassov, Sebastian Vollmer, Yasir Waheed, Yuan-Pang Wang, Andrea Winkler, Tomohide Yamada, Alex Yeshaneh, Paul Yip, Engida Yisma, Naohiro Yonemoto, Mustafa Younis, Chuanhua Yu, Sojib Bin Zaman, Yunquan Zhang, Sanjay Zodpey, Emmanuela Gakidou, and Simon I Hay.

#### [Drafting the manuscript or revising is critically for important intellectual content](#)

Foad Abd-Allah, Oladimeji Adebayo, Victor Adekanmbi, Fares Alahdab, Jacqueline Alcalde, Mehran Alijanzadeh, Nahla Anber, Catalina Liliana Andrei, Carl Abelardo T Antonio, Jalal Arabloo, Olatunde Aremu, Mehran Asadi, Marcel Ausloos, Ashish Awasthi, Suzanne Barker-Collo, Anthony Barnett, Neeraj Bedi, Kritika Bhattacharyya, Zahid Butt, Félix Carvalho, Carlos Castañeda-Orjuela, Franz Castro, Ester Cerin, Cyrus Cooper, Aso Darwesh, Rajat Das Gupta, Jan-Walter De Neve, Kebede Deribe, Beruk Desalegn, melaku desta, Daniel Diaz, Manisha Dubey, Laura Dwyer-Lindgren, Lucas Earl, Anwar Faraj, Andre Faro, Seyed-Mohammad Fereshtehnejad, Eduarda Fernandes, Irina Filip, Florian Fischer, Takeshi Fukumoto, Tiffany K Gill, Philimon Gona, Sameer Gopalani, Ayman Grada, Yuming Guo, Rajeev Gupta, Randah Hamadeh, Mehdi Hasan, Hamid Y. Hassen, Claudiu Herteliu, Long Hoang Nguyen, Michael Hole, Naznin Hossain, Mehdi Hosseinzadeh, Olayinka Ilesanmi, Sheikh Mohammed Shariful Islam, Nader Jafaribalalami , Mihajlo Jakovljevic, Ravi Prakash Jha, Jost B. Jonas, Jacek Jozwiak, Amir Kasaeian, Amir Kasaeian, Peter Keiyoro, Chandrasekharan Nair Kesavachandran, Yousef Khader, morteza abdullatif khafaie, Ejaz Khan, Mona Khater, Ali Kiadaliri, Hamidreza Komaki, Ai Koyanagi, Barthelemy Kuate Defo, Manasi Kumar, Paul Lee, Shanshan Li, Lee-Ling Lim, Stefan Listl, Jaifred Christian Lopez, Azeem Majeed, Reza Malekzadeh, Francisco Rogerlândio Martins-Melo, Anthony Masaka, Benjamin Massenburg, Walter Mendoza, Tuomo Meretoja, Tomislav Mestrovic, Ted R Miller, Babak Moazen, Dara Mohammad, Shafiu Mohammed, Farnam Mohebi, Ali Mokdad, Lorenzo Monasta, Ghobad Moradi, Maziar Moradi-Lakeh, Paula Moraga, Shane Morrison, Jonathan Mosser, Christopher J L Murray, Seyed Sina Naghibi Irvani, Azin Nahvijou, Ionut Negoii, Ruxandra Irina Negoii, Josephine Ngunjiri, Felix Ogbo, Andrew T. Olagunju, Bolajoko Olusanya, Jacob Olusanya, Obinna Onwujekwe , Doris V. Ortega-Altamirano, Eduardo Ortiz-Panozo, Simon Øverland, Mahesh P A, Adrian Pana, Songhomitra Panda-Jonas, Sanghamitra Pati, George Patton, David Pigott, Maarten Postma, Mostafa Qorbani, Amir Radfar, Fakher Rahim, VAFA RAHIMI-MOVAGHAR, Chhabi Lal Ranabhat, Carlos Rios-González, Leonardo Roever, Enrico Rubagotti, Nasir Salam, Hamideh Salimzadeh, Abdallah M. Samy, Juan Sanabria , Milena Santric-Milicevic, David C Schwebel, Sadaf Sepanlou, Masood Ali Shaikh, Mehdi Sharif, Mika Shigematsu, jasvinder singh, Dharendra Narain Sinha, Joan B Soriano, Ireneous Soyiri, chandrashekhar T sreeramareddy, Muawiyah Babale Sufiyan, Ipsita Sutradhar , Cuong Tat Nguyen, Mohamad-Hani Temsah, Zemenu Tessema, Giang Thu Vu, Marcos Roberto Tovani-Palone, Bach Tran, Irfan Ullah, Francesco S Violante, Vasiliy Vlassov,

Yuan-Pang Wang, Andrea Winkler, Alex Yeshaneh, Sojib Bin Zaman, Jianrong Zhang, Emmanuela Gakidou, and Simon I Hay.
